# Supplementary material
Source: PubMed Central journal article supplement (PMC3321128)

## Supporting Information (Part I) for the Article entitled

### Access to “Friedel-Crafts-restricted” *tert*-alkyl aromatics by activation/methylation of tertiary benzylic alcohols

Joshua A. Hartsel, Derek T. Craft, Qiao-Hong Chen, Ming Ma, and Paul R. Carlier\*

*Department of Chemistry, Virginia Tech, Blacksburg, Virginia 24061*

[pcarlier@vt.edu](mailto:pcarlier@vt.edu)

#### Table of Contents

| Item                                                      | Page |
|-----------------------------------------------------------|------|
| <sup>1</sup> H NMR spectrum of <b>2b</b>                  | S2   |
| <sup>1</sup> H NMR spectrum of <b>2c</b>                  | S3   |
| <sup>1</sup> H NMR spectrum of <b>2d</b>                  | S4   |
| <sup>1</sup> H & <sup>13</sup> C NMR spectra of <b>2e</b> | S5   |
| <sup>1</sup> H NMR spectrum of <b>2f</b>                  | S7   |
| <sup>1</sup> H & <sup>13</sup> C NMR spectra of <b>2g</b> | S8   |
| <sup>1</sup> H & <sup>13</sup> C NMR spectra of <b>2h</b> | S10  |
| <sup>1</sup> H NMR spectrum of <b>2i</b>                  | S12  |
| <sup>1</sup> H & <sup>13</sup> C NMR spectra of <b>2j</b> | S13  |
| <sup>1</sup> H & <sup>13</sup> C NMR spectra of <b>2k</b> | S15  |
| <sup>1</sup> H NMR spectrum of <b>2l</b>                  | S17  |
| <sup>1</sup> H NMR spectrum of <b>4b</b>                  | S18  |
| <sup>1</sup> H & <sup>13</sup> C NMR spectra of <b>4c</b> | S19  |
| <sup>1</sup> H NMR spectrum of <b>4d</b>                  | S21  |
| <sup>1</sup> H & <sup>13</sup> C NMR spectra of <b>4f</b> | S22  |
| <sup>1</sup> H & <sup>13</sup> C NMR spectra of <b>4h</b> | S24  |
| <sup>1</sup> H & <sup>13</sup> C NMR spectra of <b>4i</b> | S26  |
| <sup>1</sup> H & <sup>13</sup> C NMR spectra of <b>5c</b> | S28  |
| <sup>1</sup> H & <sup>13</sup> C NMR spectra of <b>5d</b> | S30  |
| <sup>1</sup> H & <sup>13</sup> C NMR spectra of <b>5f</b> | S32  |
| <sup>1</sup> H & <sup>13</sup> C NMR spectra of <b>5g</b> | S34  |
| <sup>1</sup> H & <sup>13</sup> C NMR spectra of <b>5h</b> | S36  |
| <sup>1</sup> H & <sup>13</sup> C NMR spectra of <b>6b</b> | S38  |
| <sup>1</sup> H & <sup>13</sup> C NMR spectra of <b>6d</b> | S40  |
| <sup>1</sup> H & <sup>13</sup> C NMR spectra of <b>6g</b> | S42  |
| <sup>1</sup> H & <sup>13</sup> C NMR spectra of <b>6j</b> | S44  |
| <sup>1</sup> H & <sup>13</sup> C NMR spectra of <b>6k</b> | S46  |
| <sup>1</sup> H & <sup>13</sup> C NMR spectra of <b>7d</b> | S48  |
| <sup>1</sup> H & <sup>13</sup> C NMR spectra of <b>7i</b> | S50  |

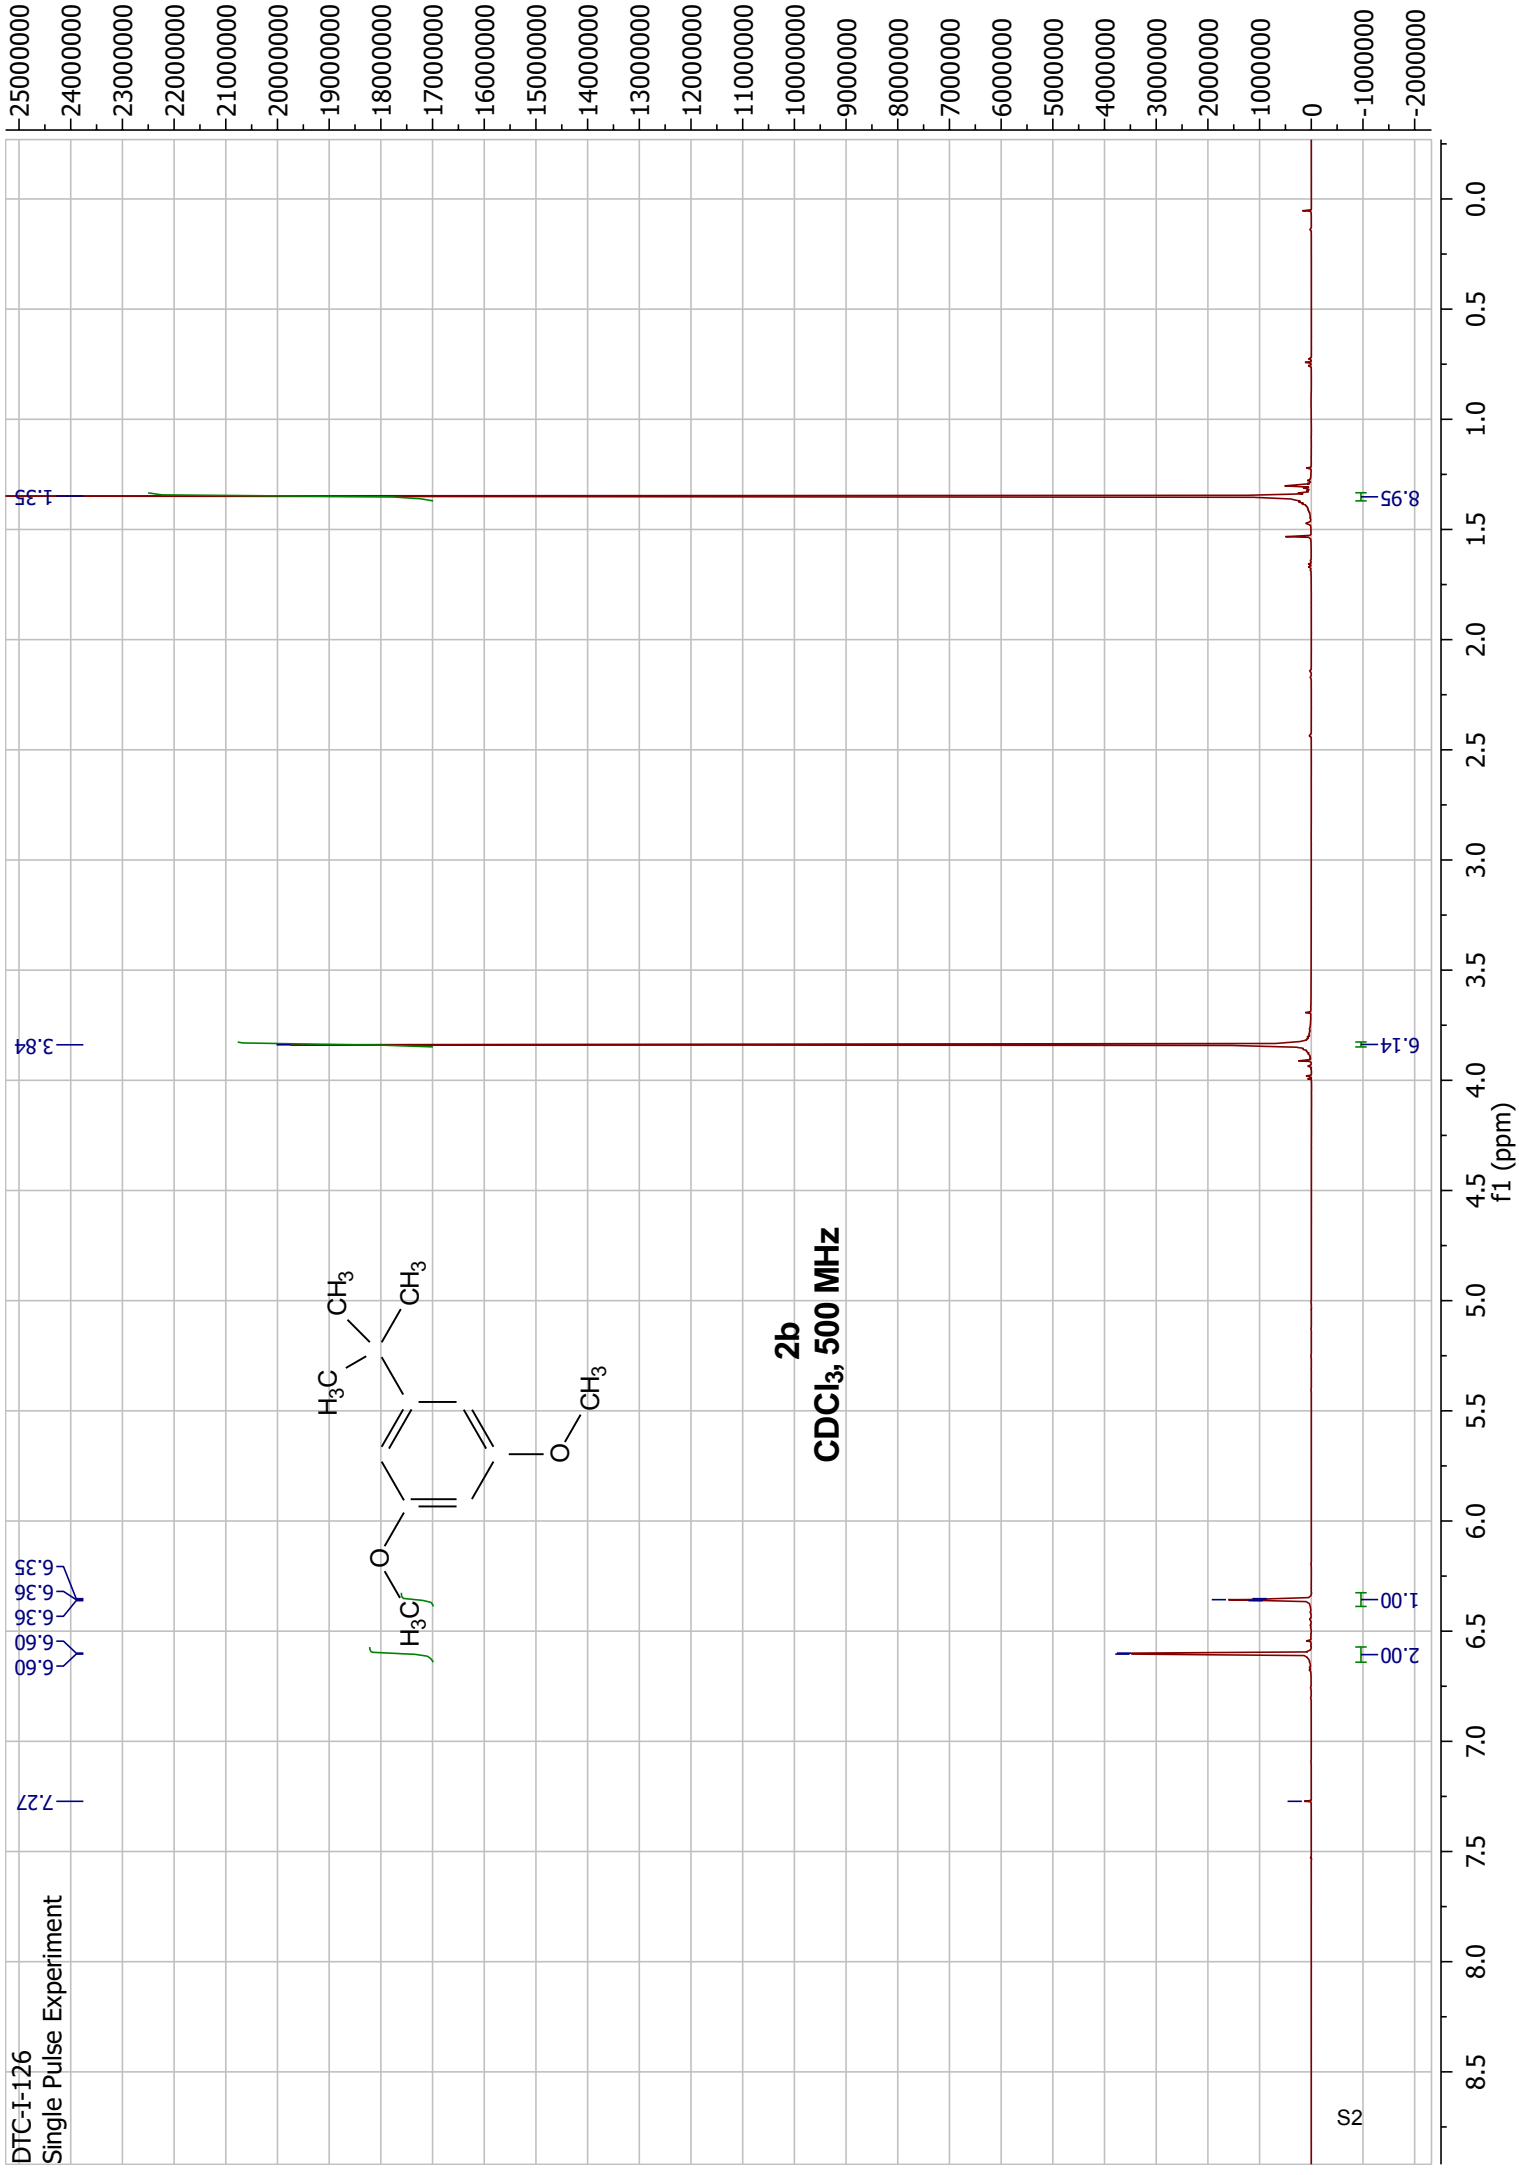

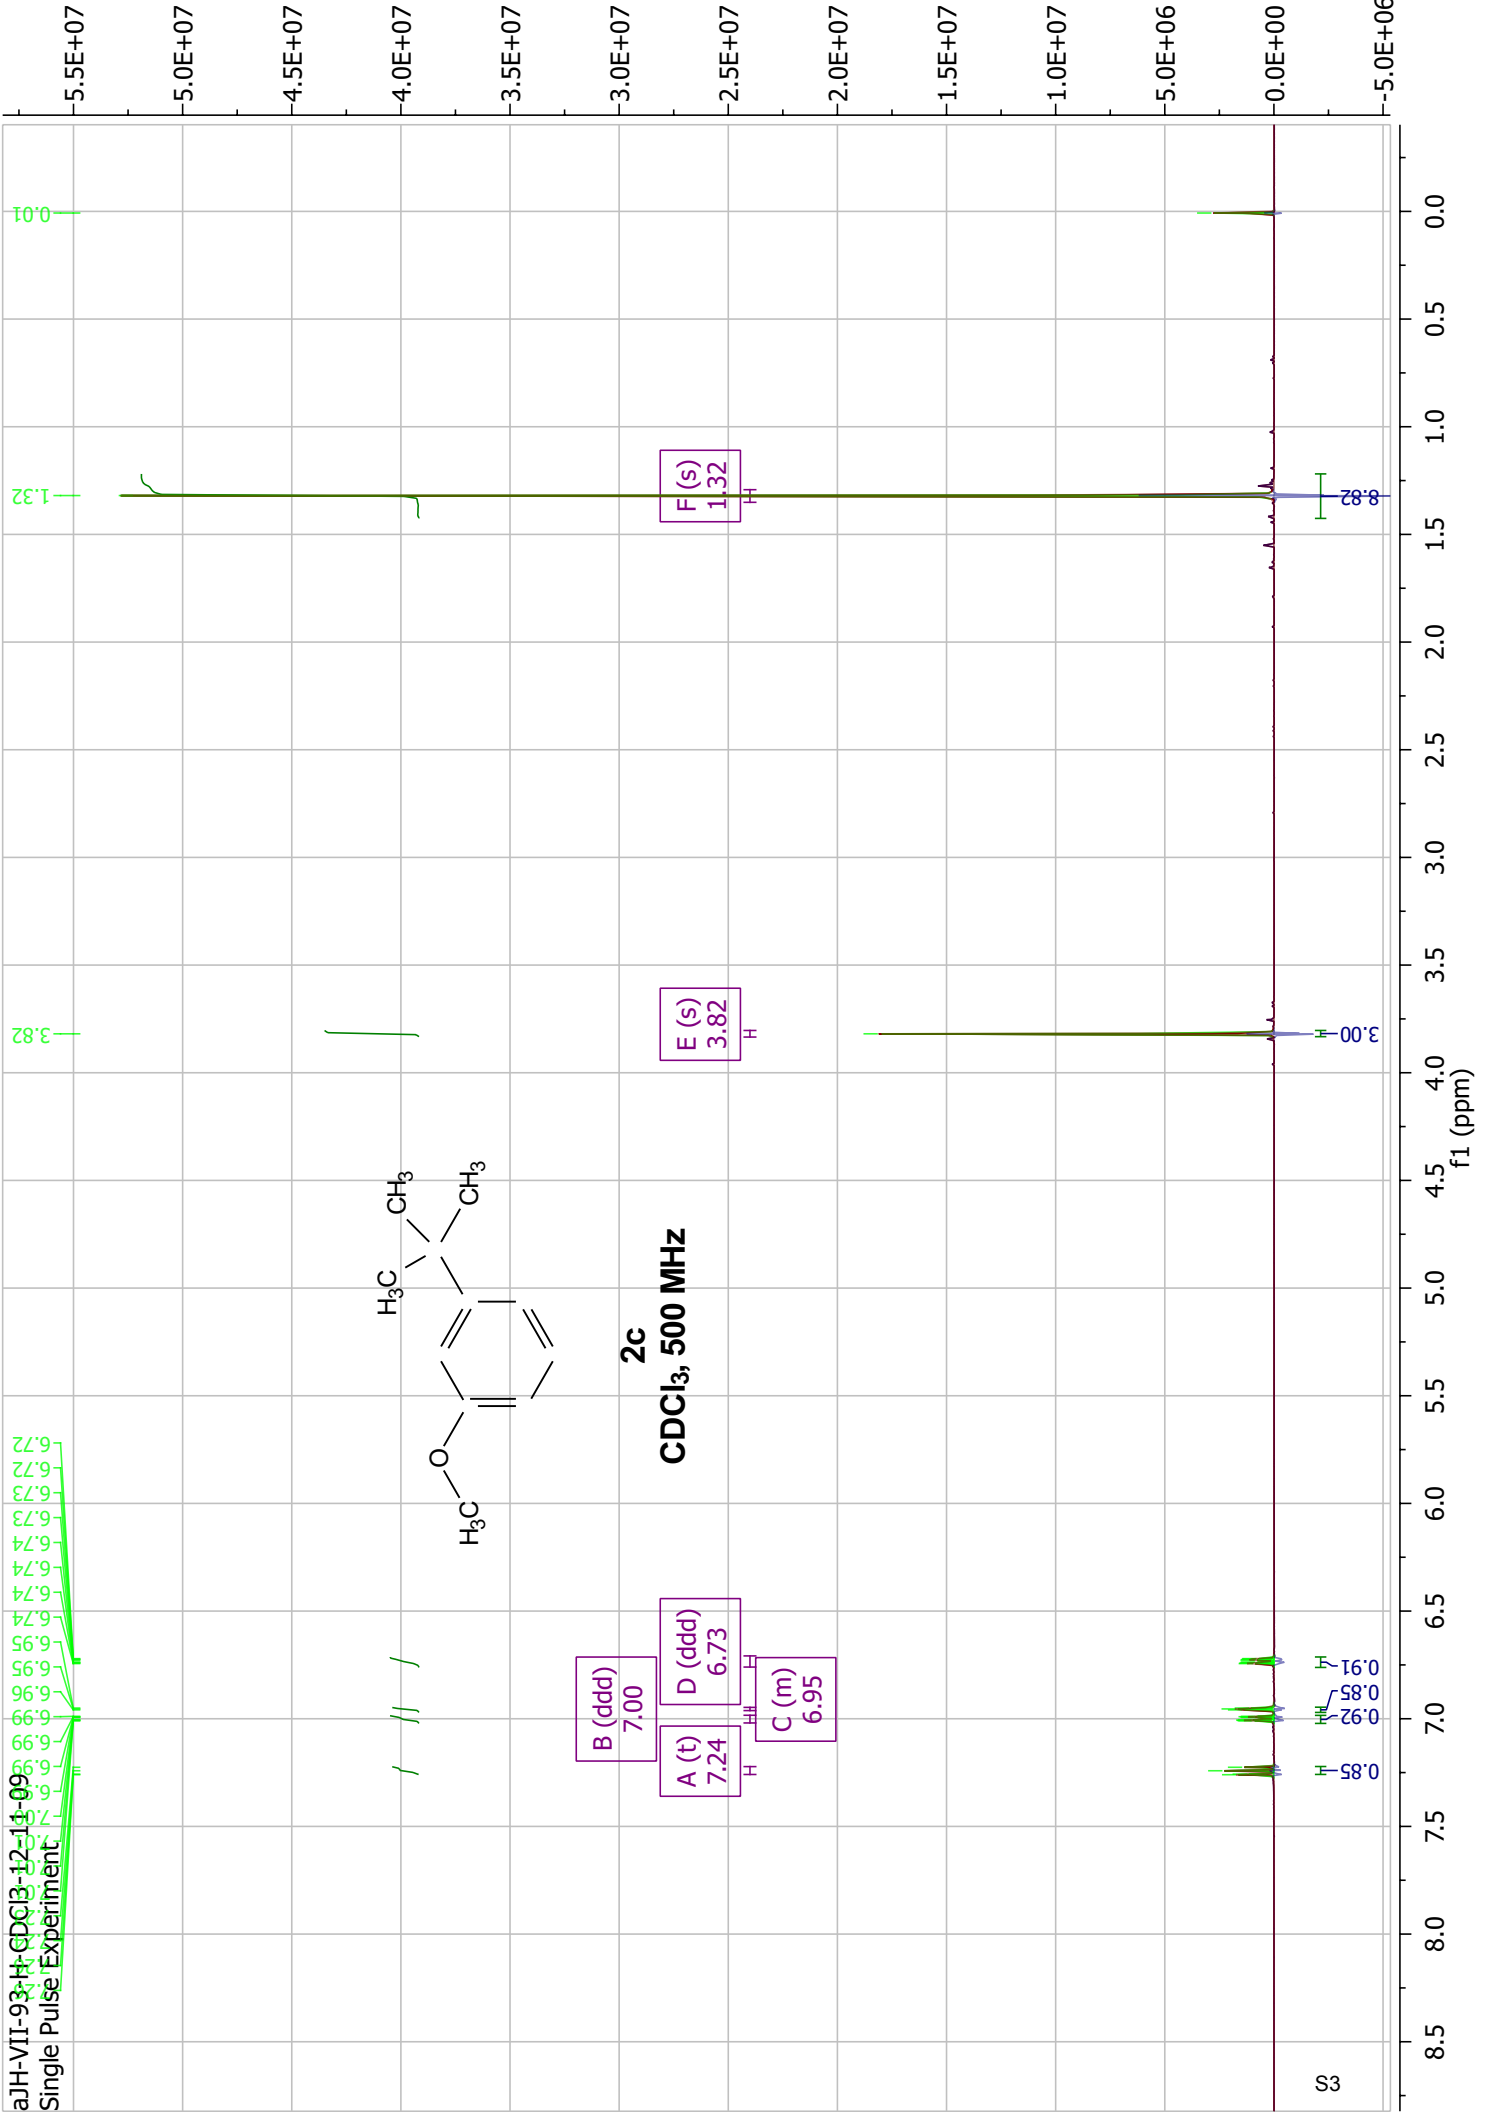

aJH-VII-93-H-GDCB-12-16-09  
Single Pulse Experiment

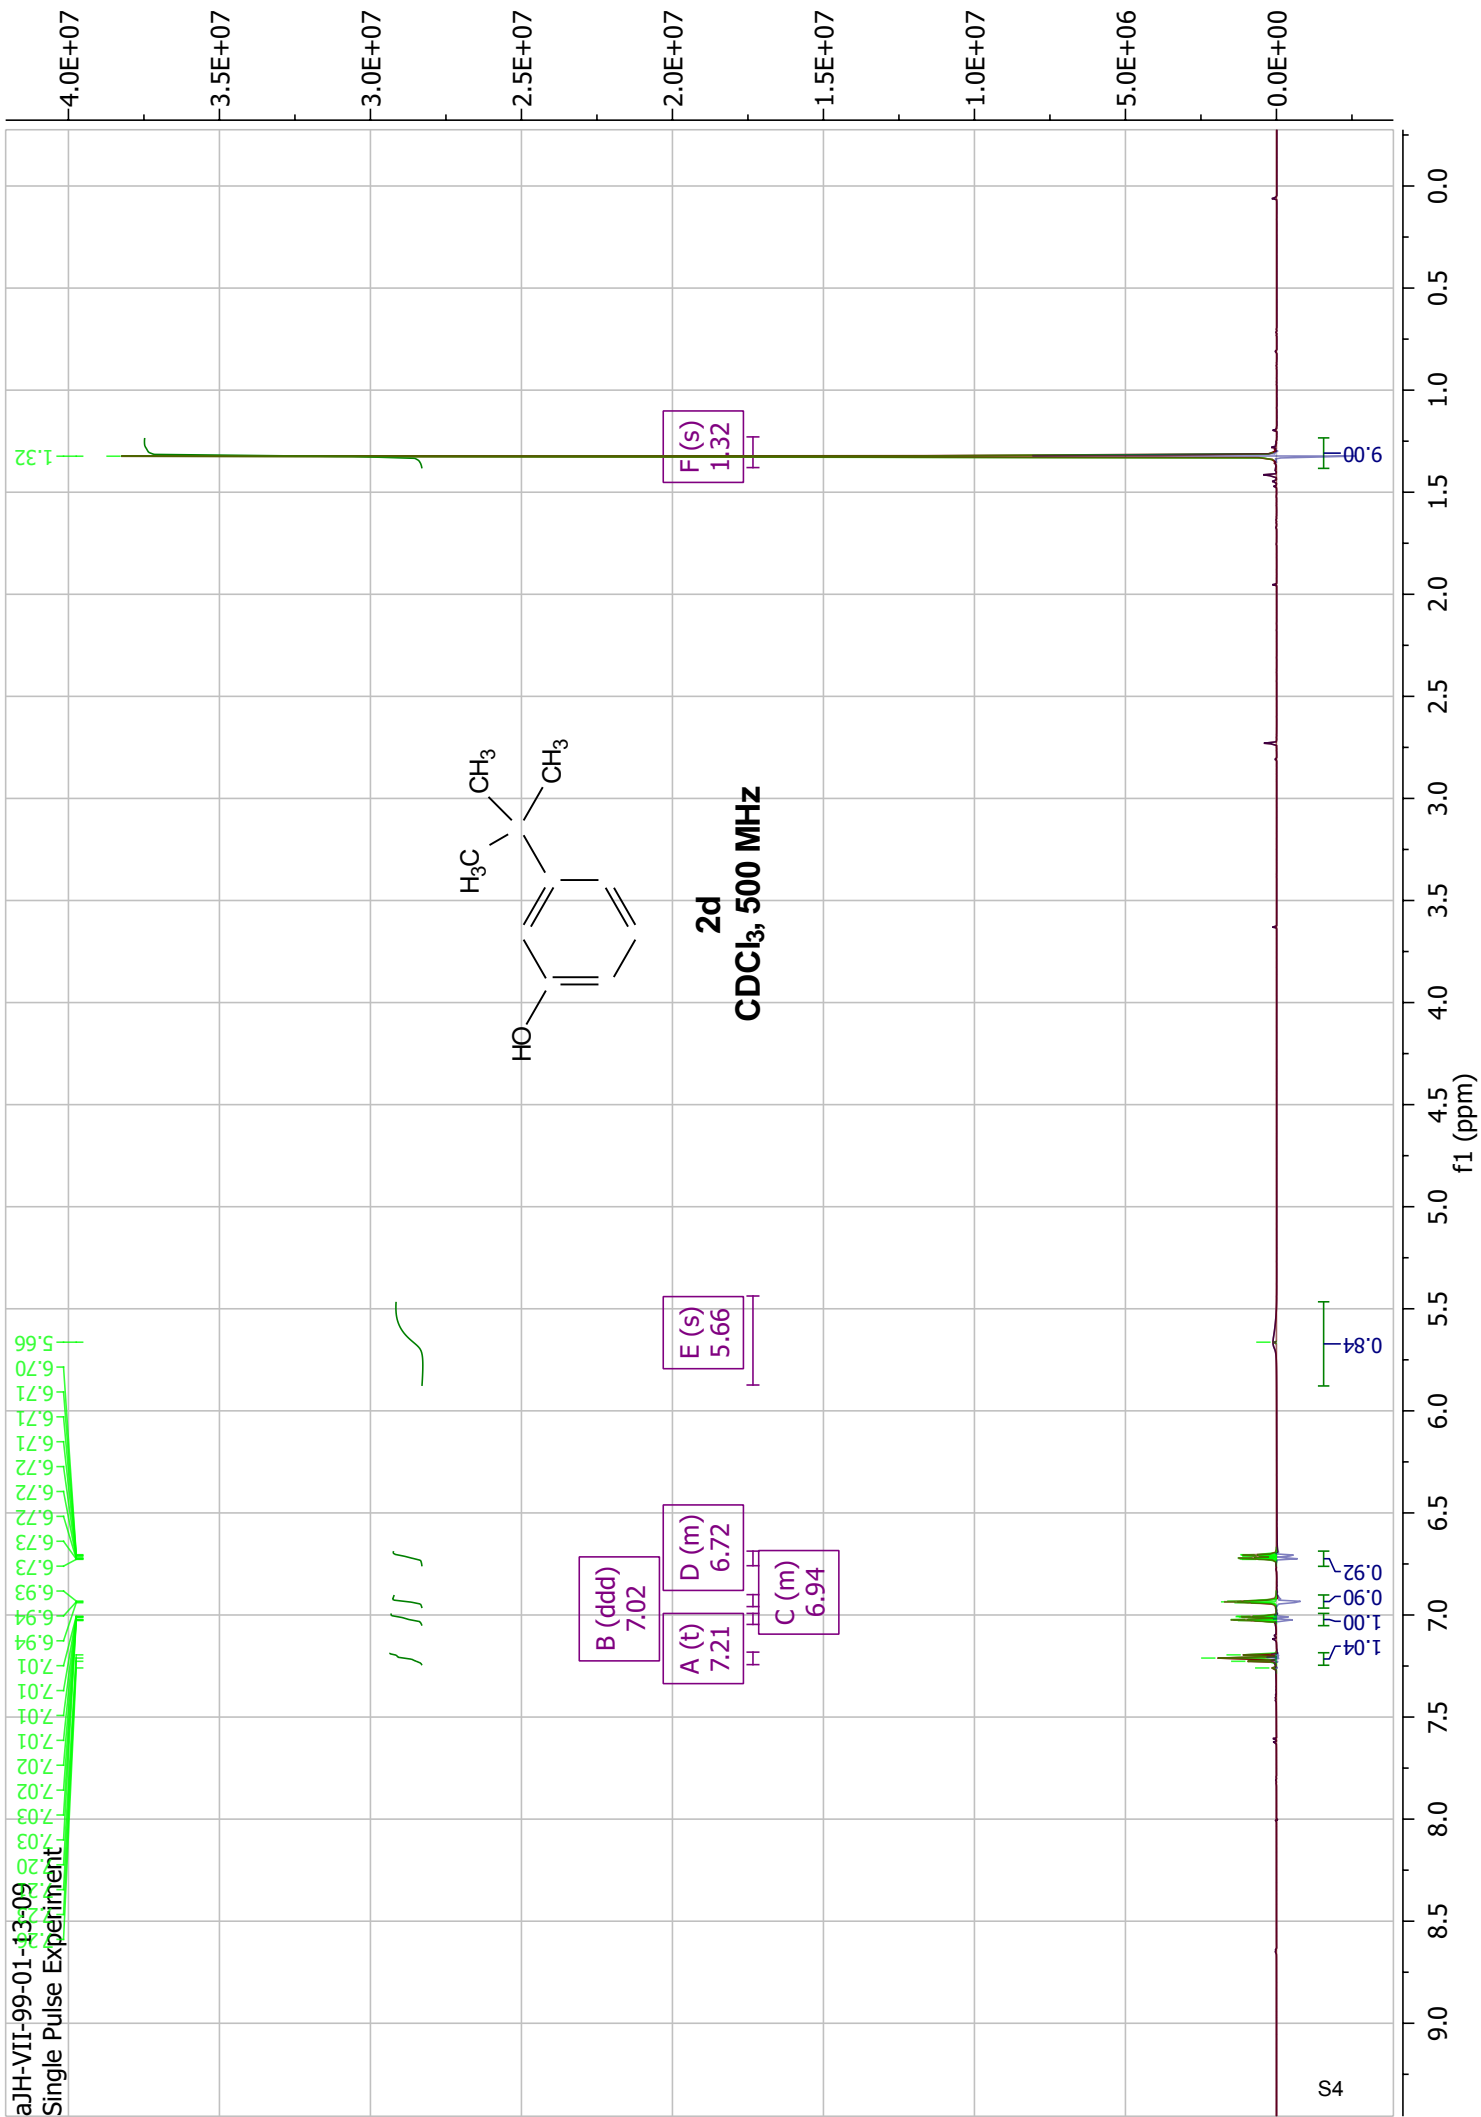

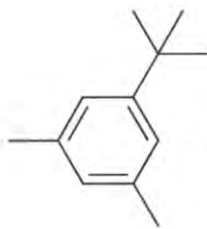

**2e**

**CDCl<sub>3</sub>, 500 MHz**

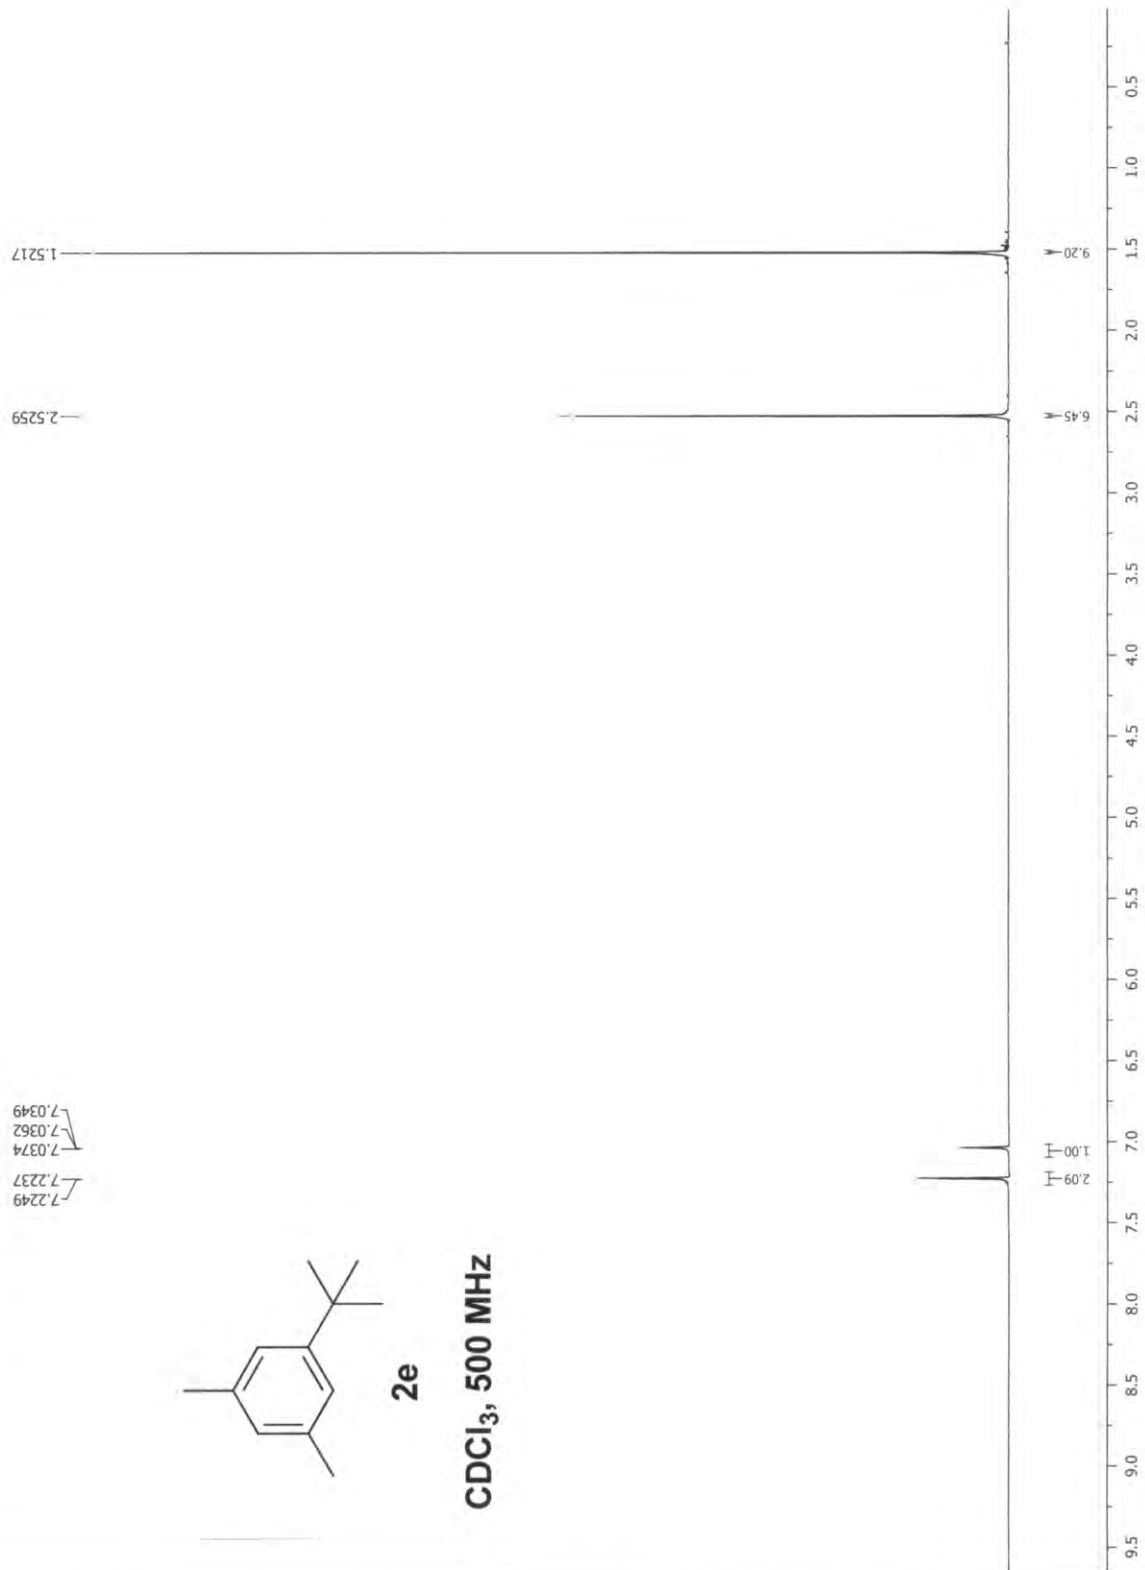

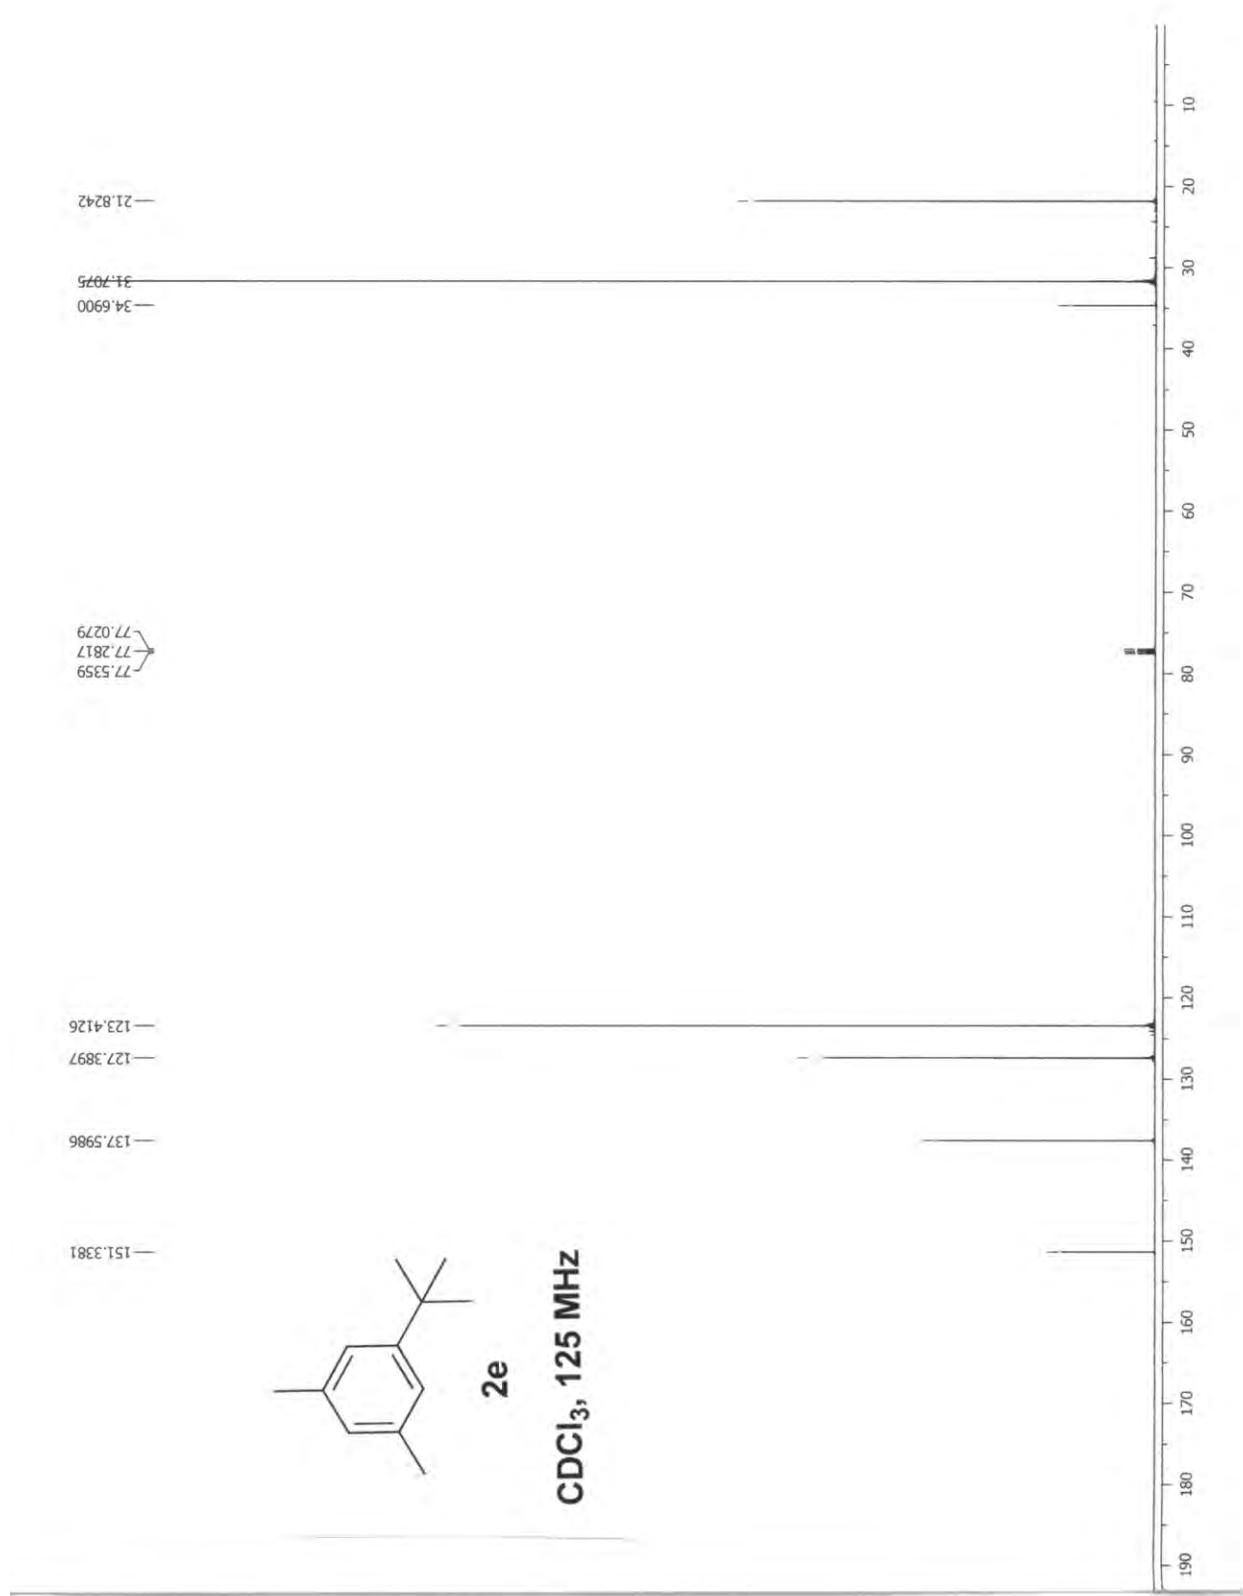

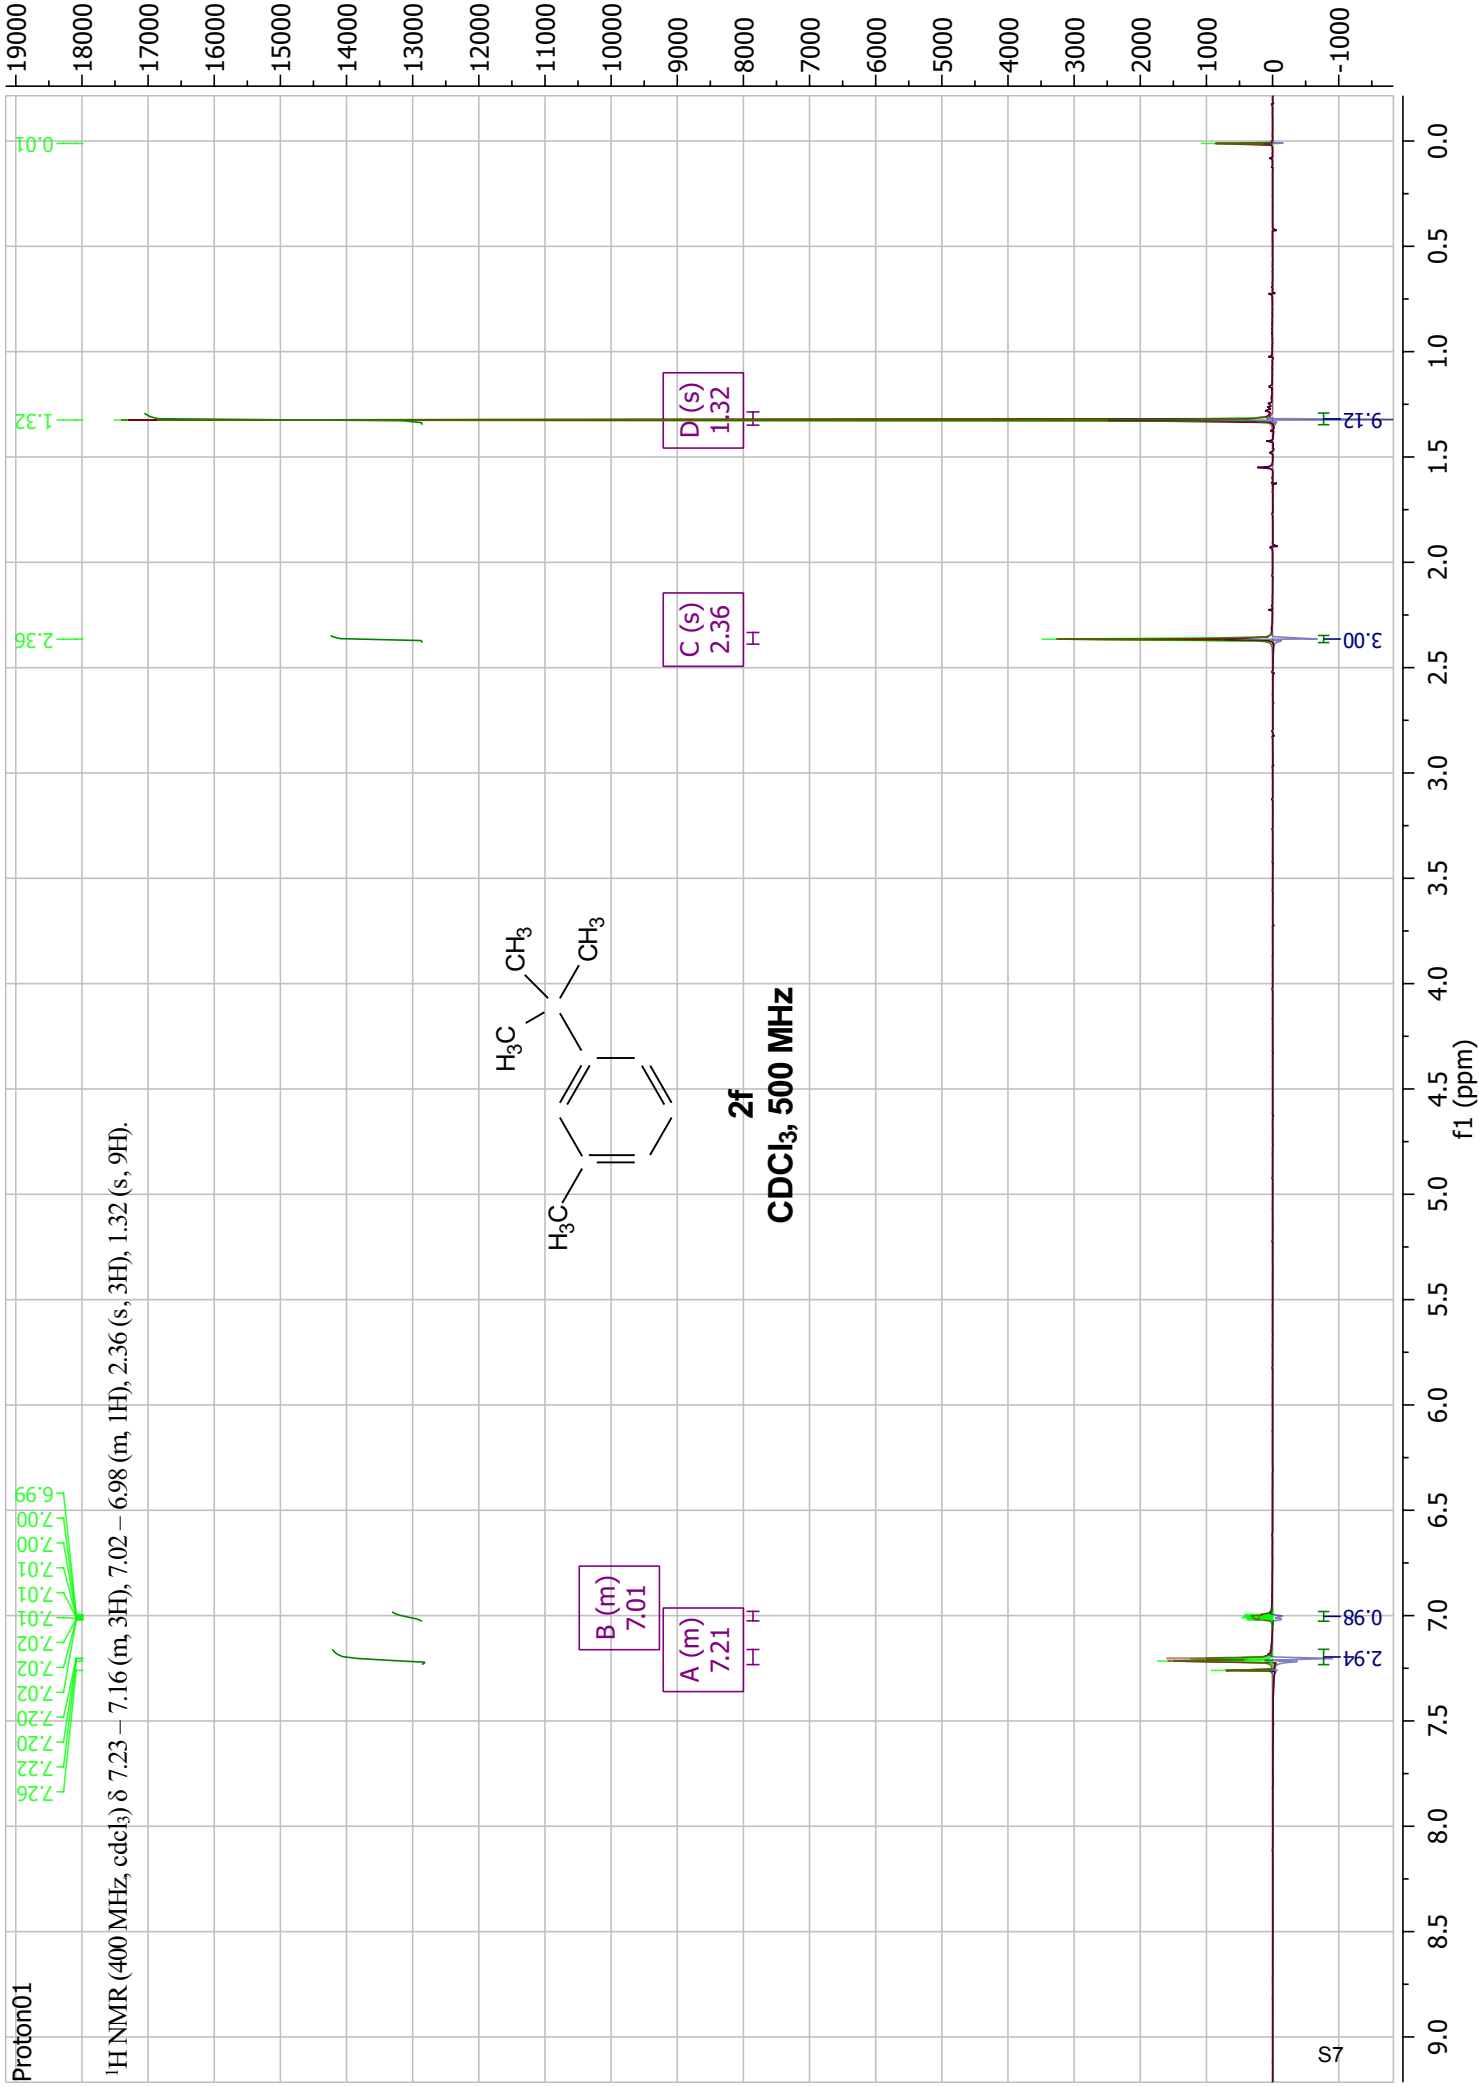

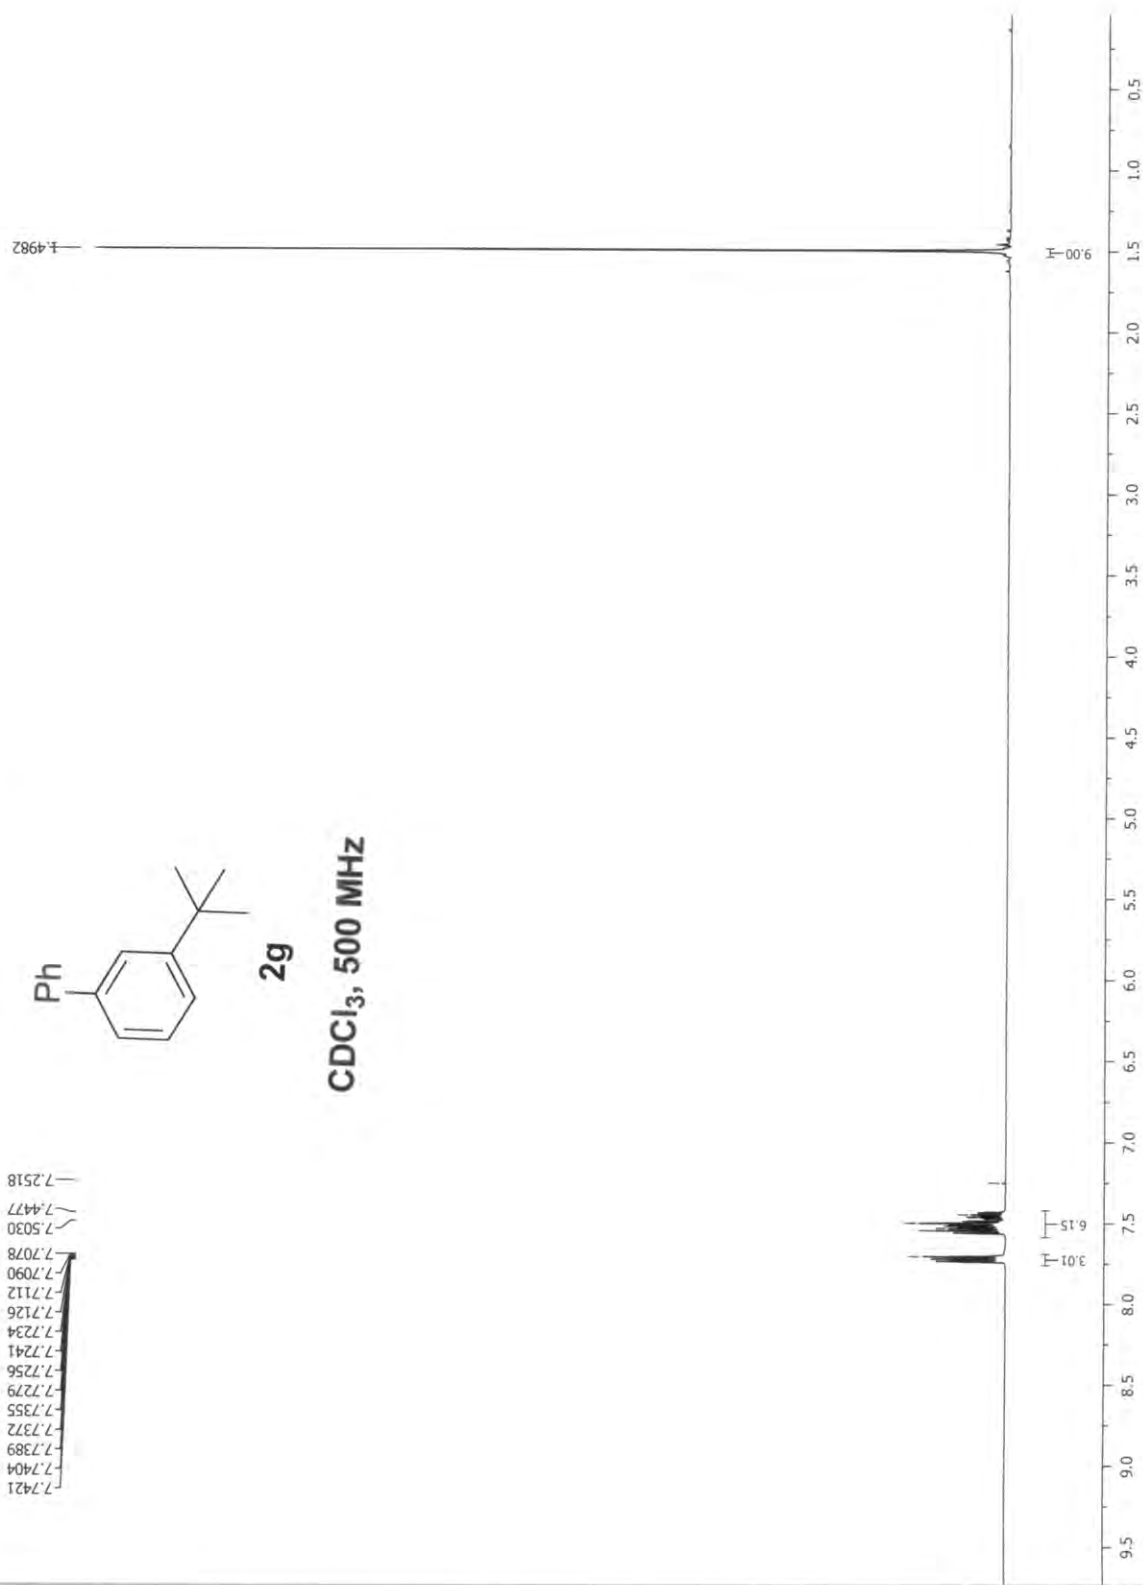



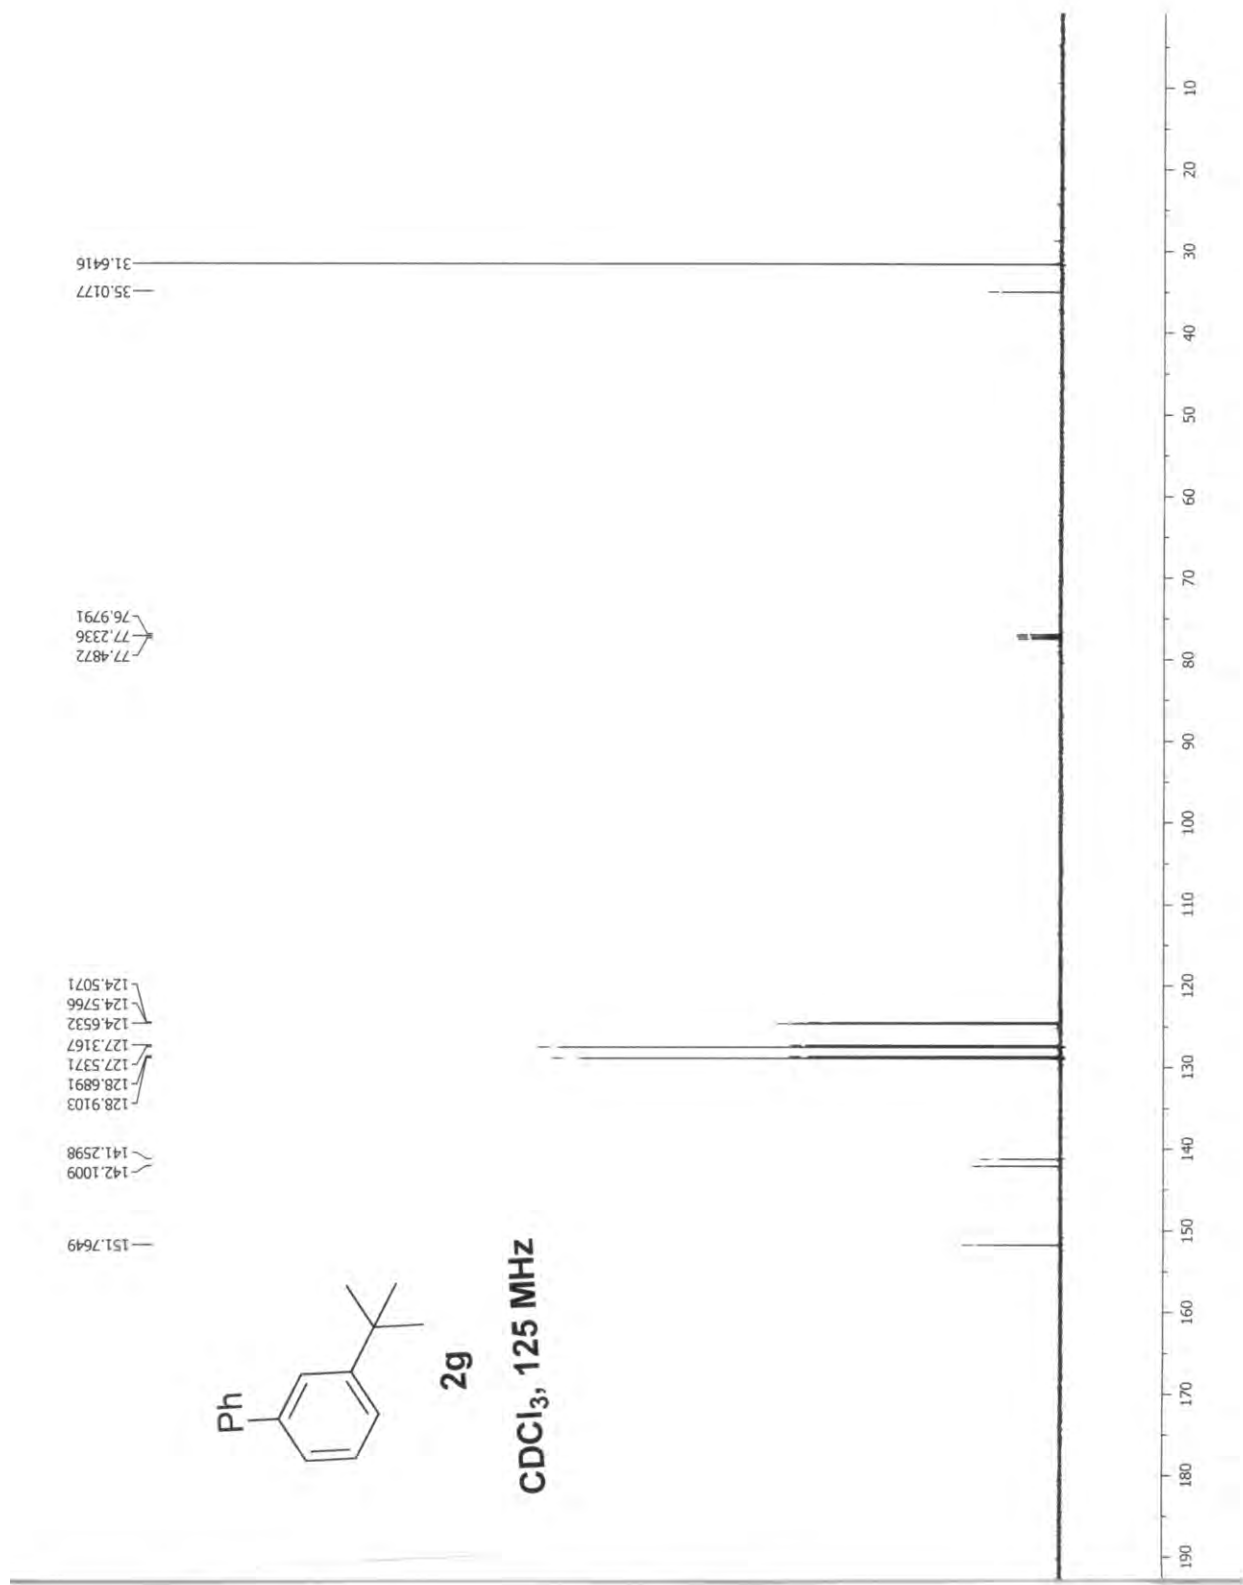

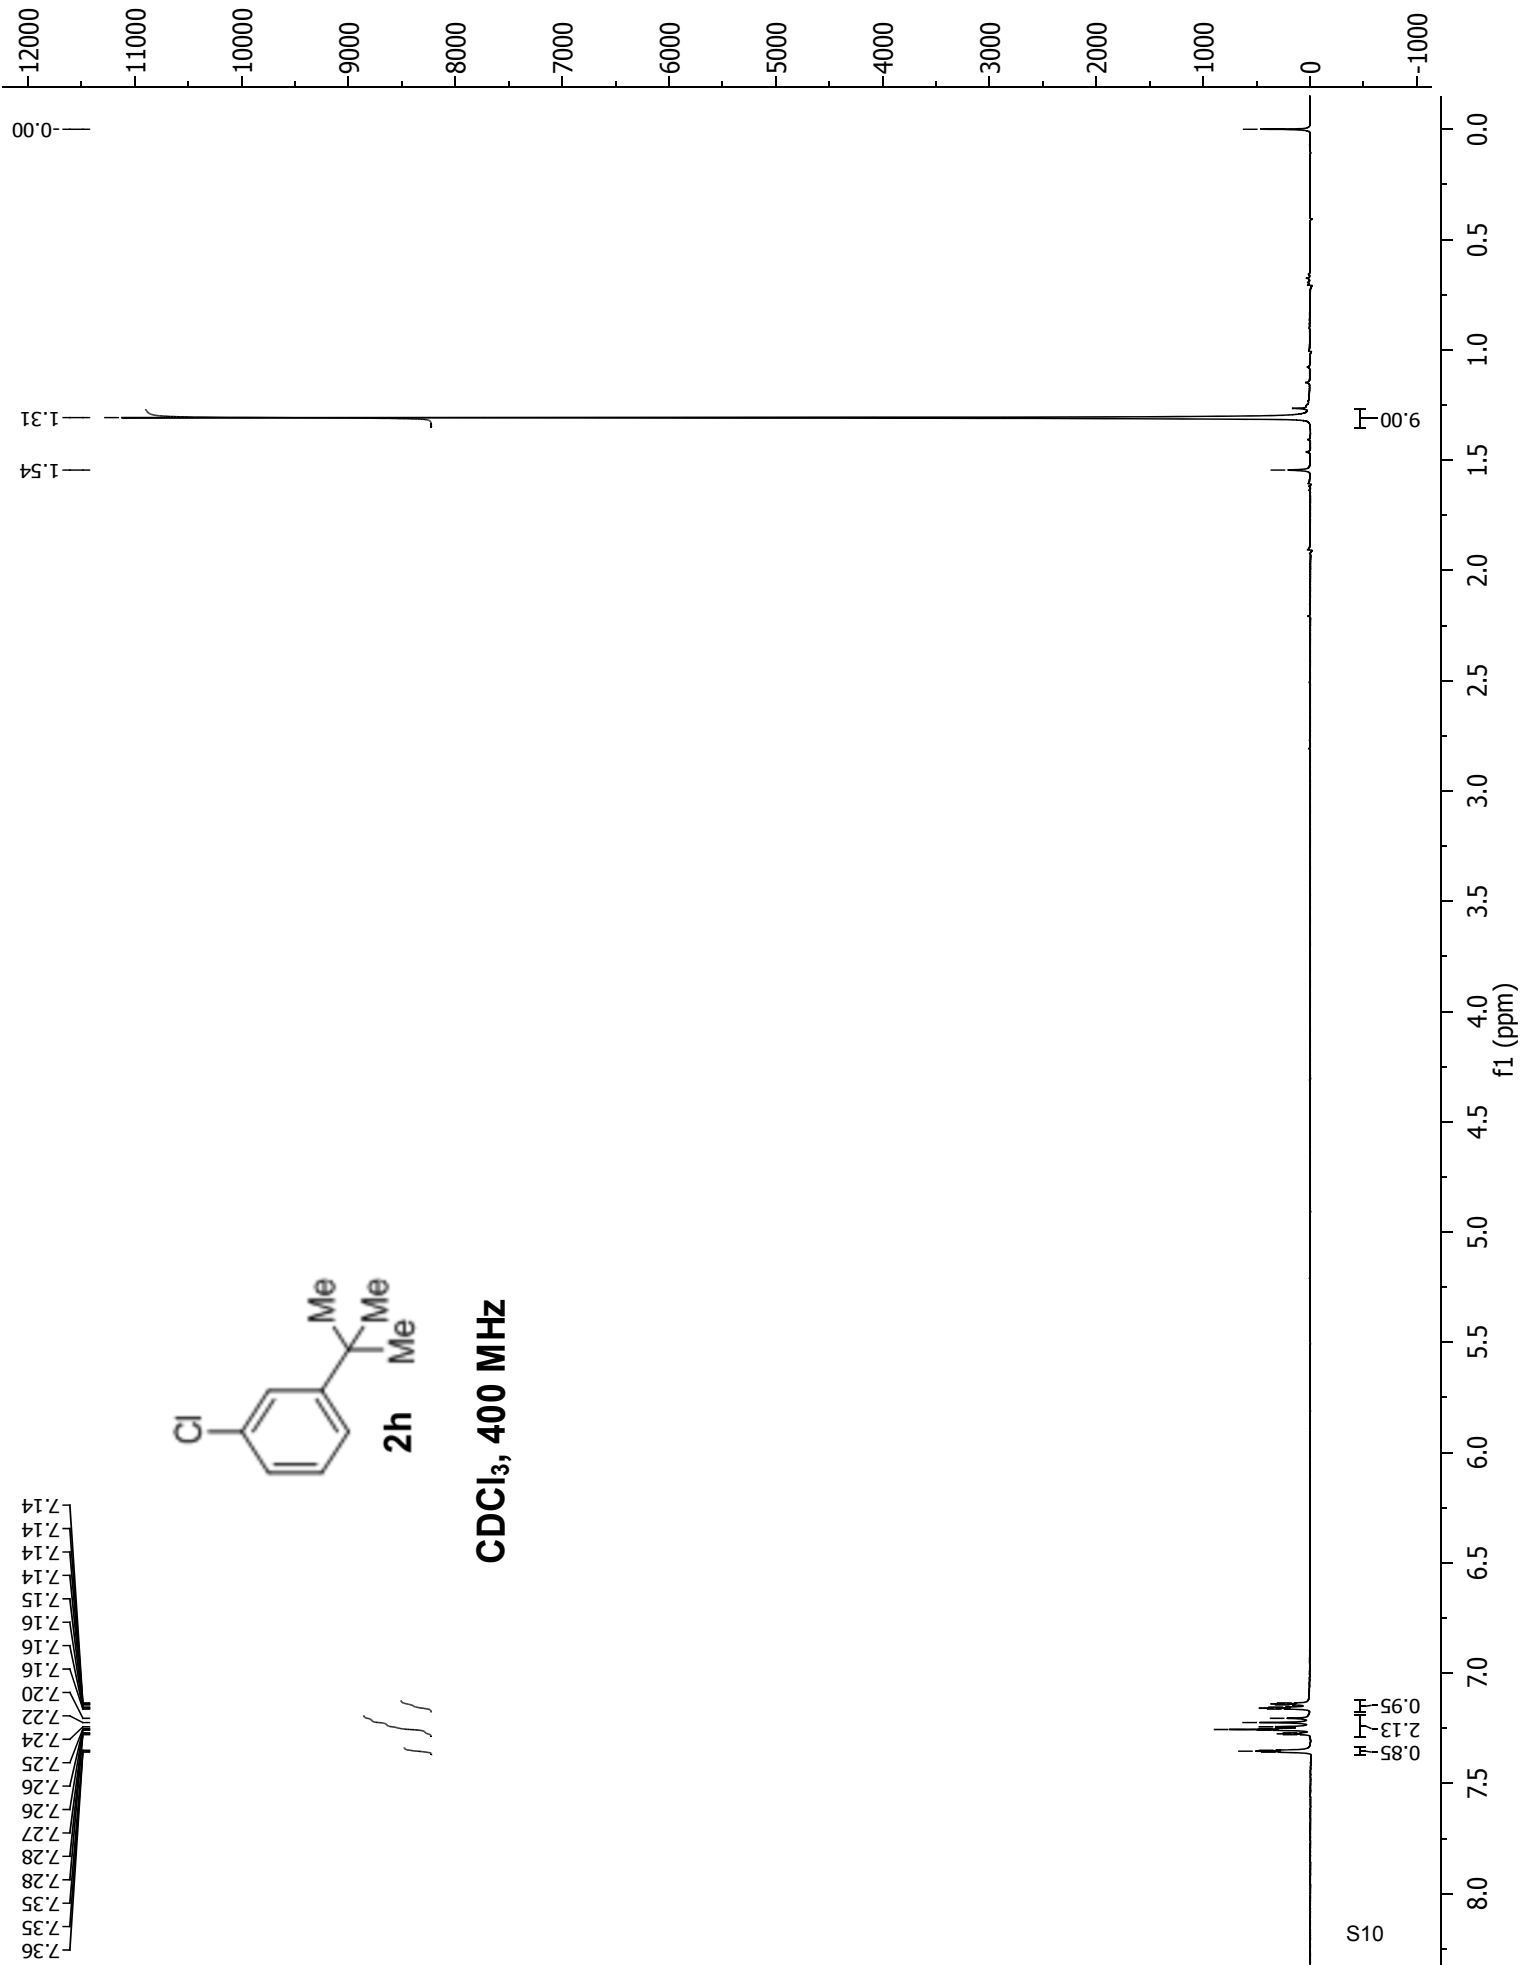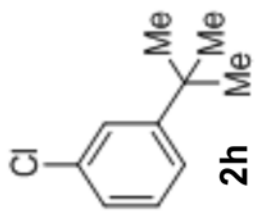

CDCl<sub>3</sub>, 400 MHz

7.36  
7.35  
7.35  
7.28  
7.28  
7.27  
7.26  
7.26  
7.26  
7.24  
7.24  
7.22  
7.20  
7.16  
7.16  
7.16  
7.15  
7.14  
7.14  
7.14  
7.14

0.85  
2.13  
0.95

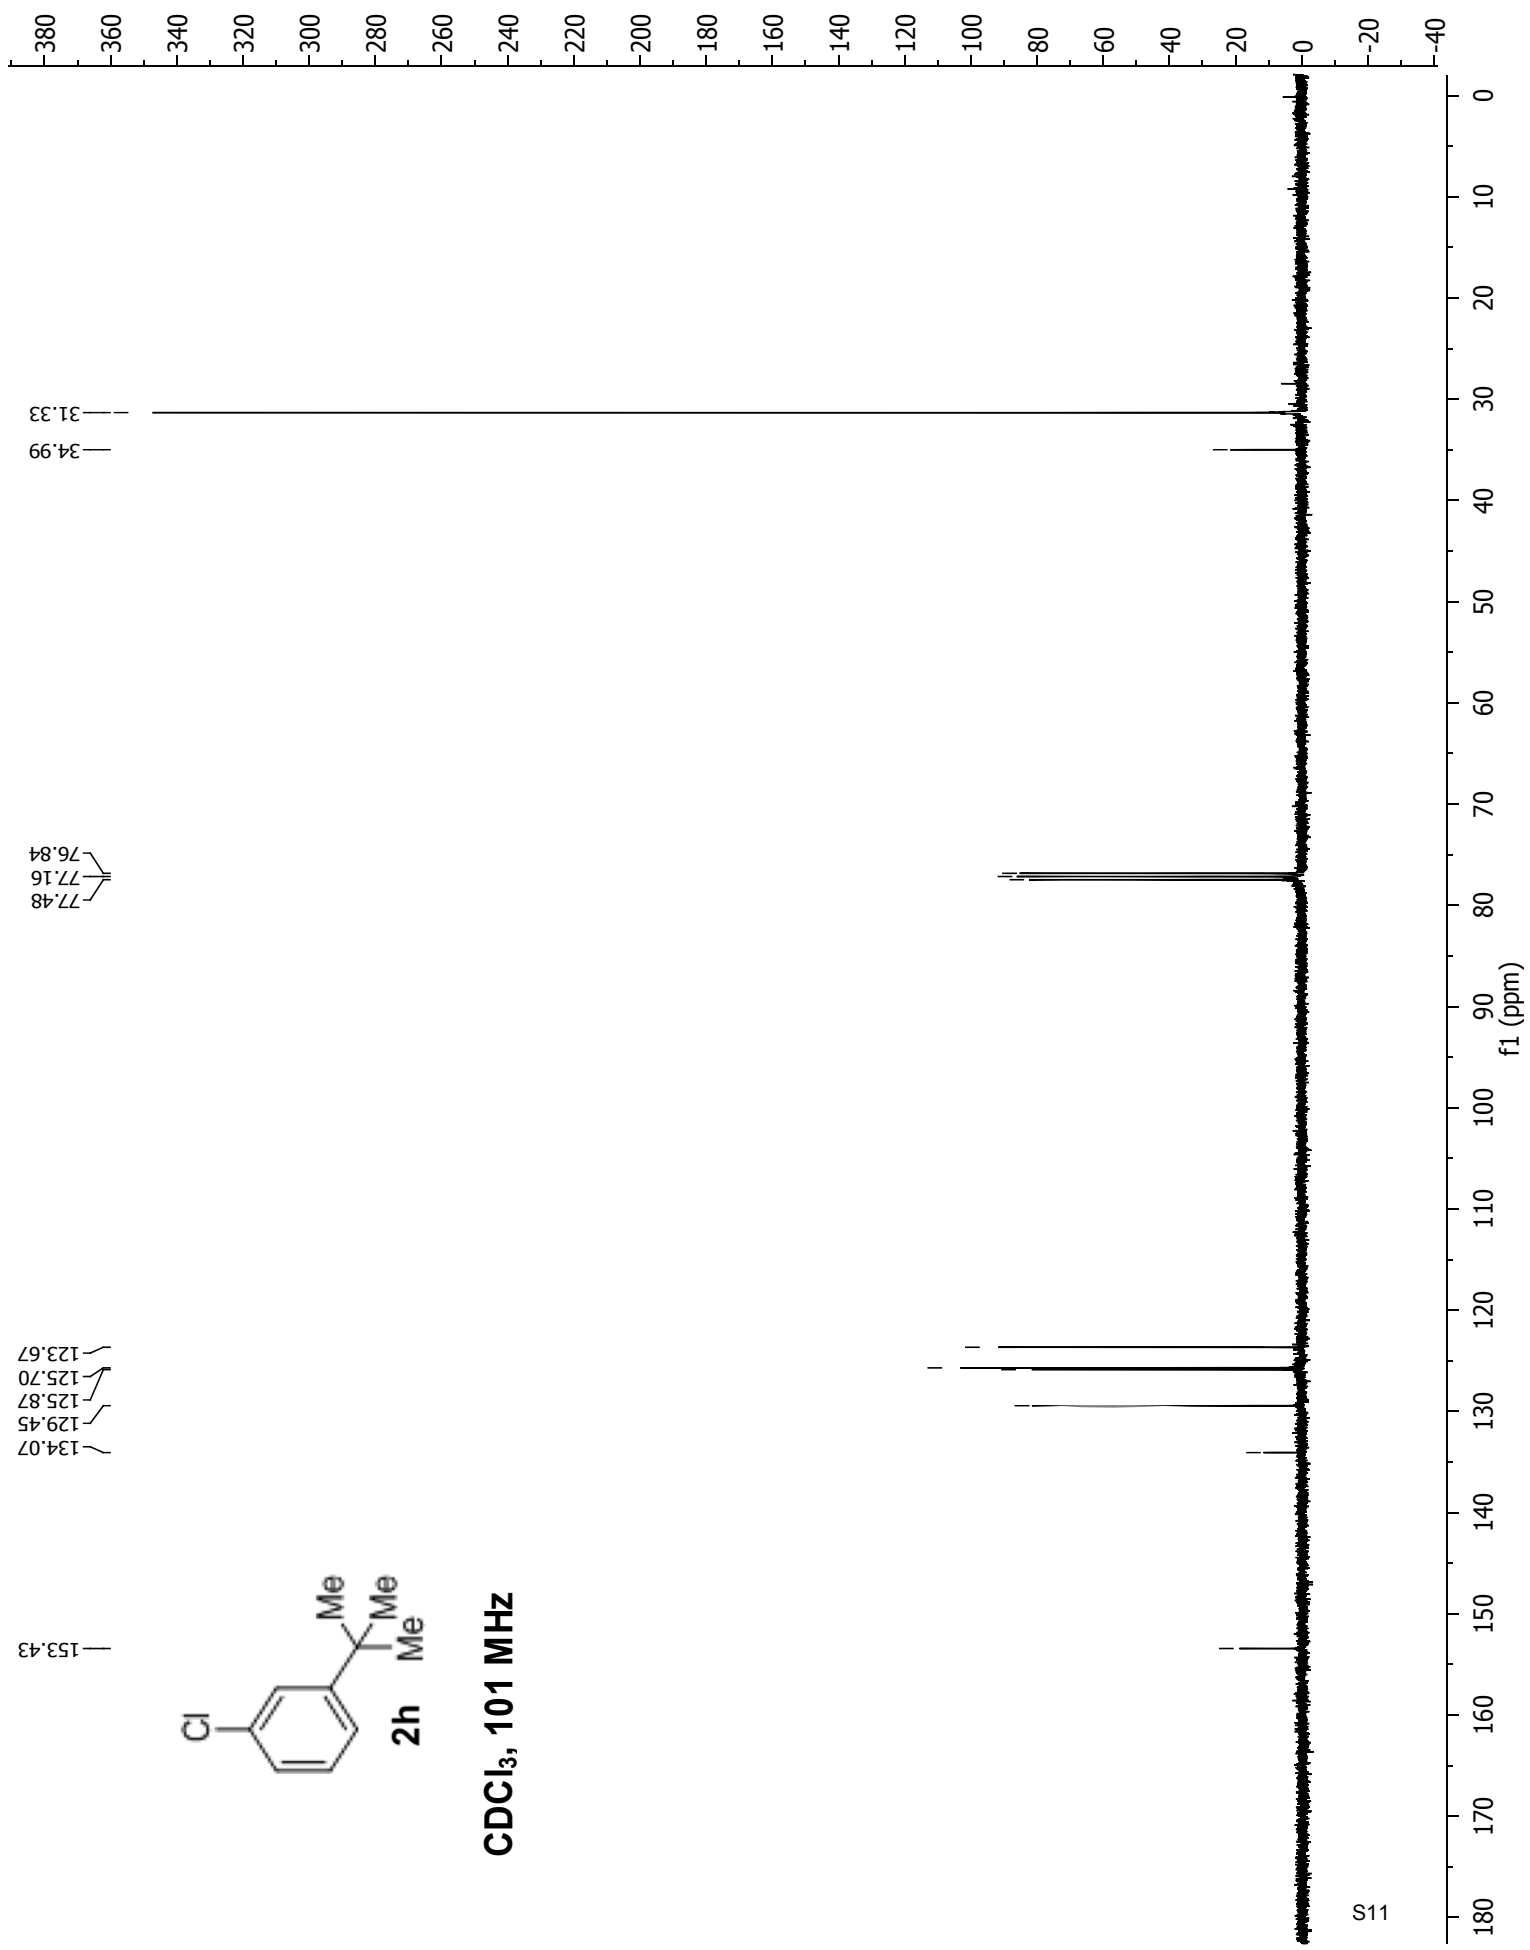

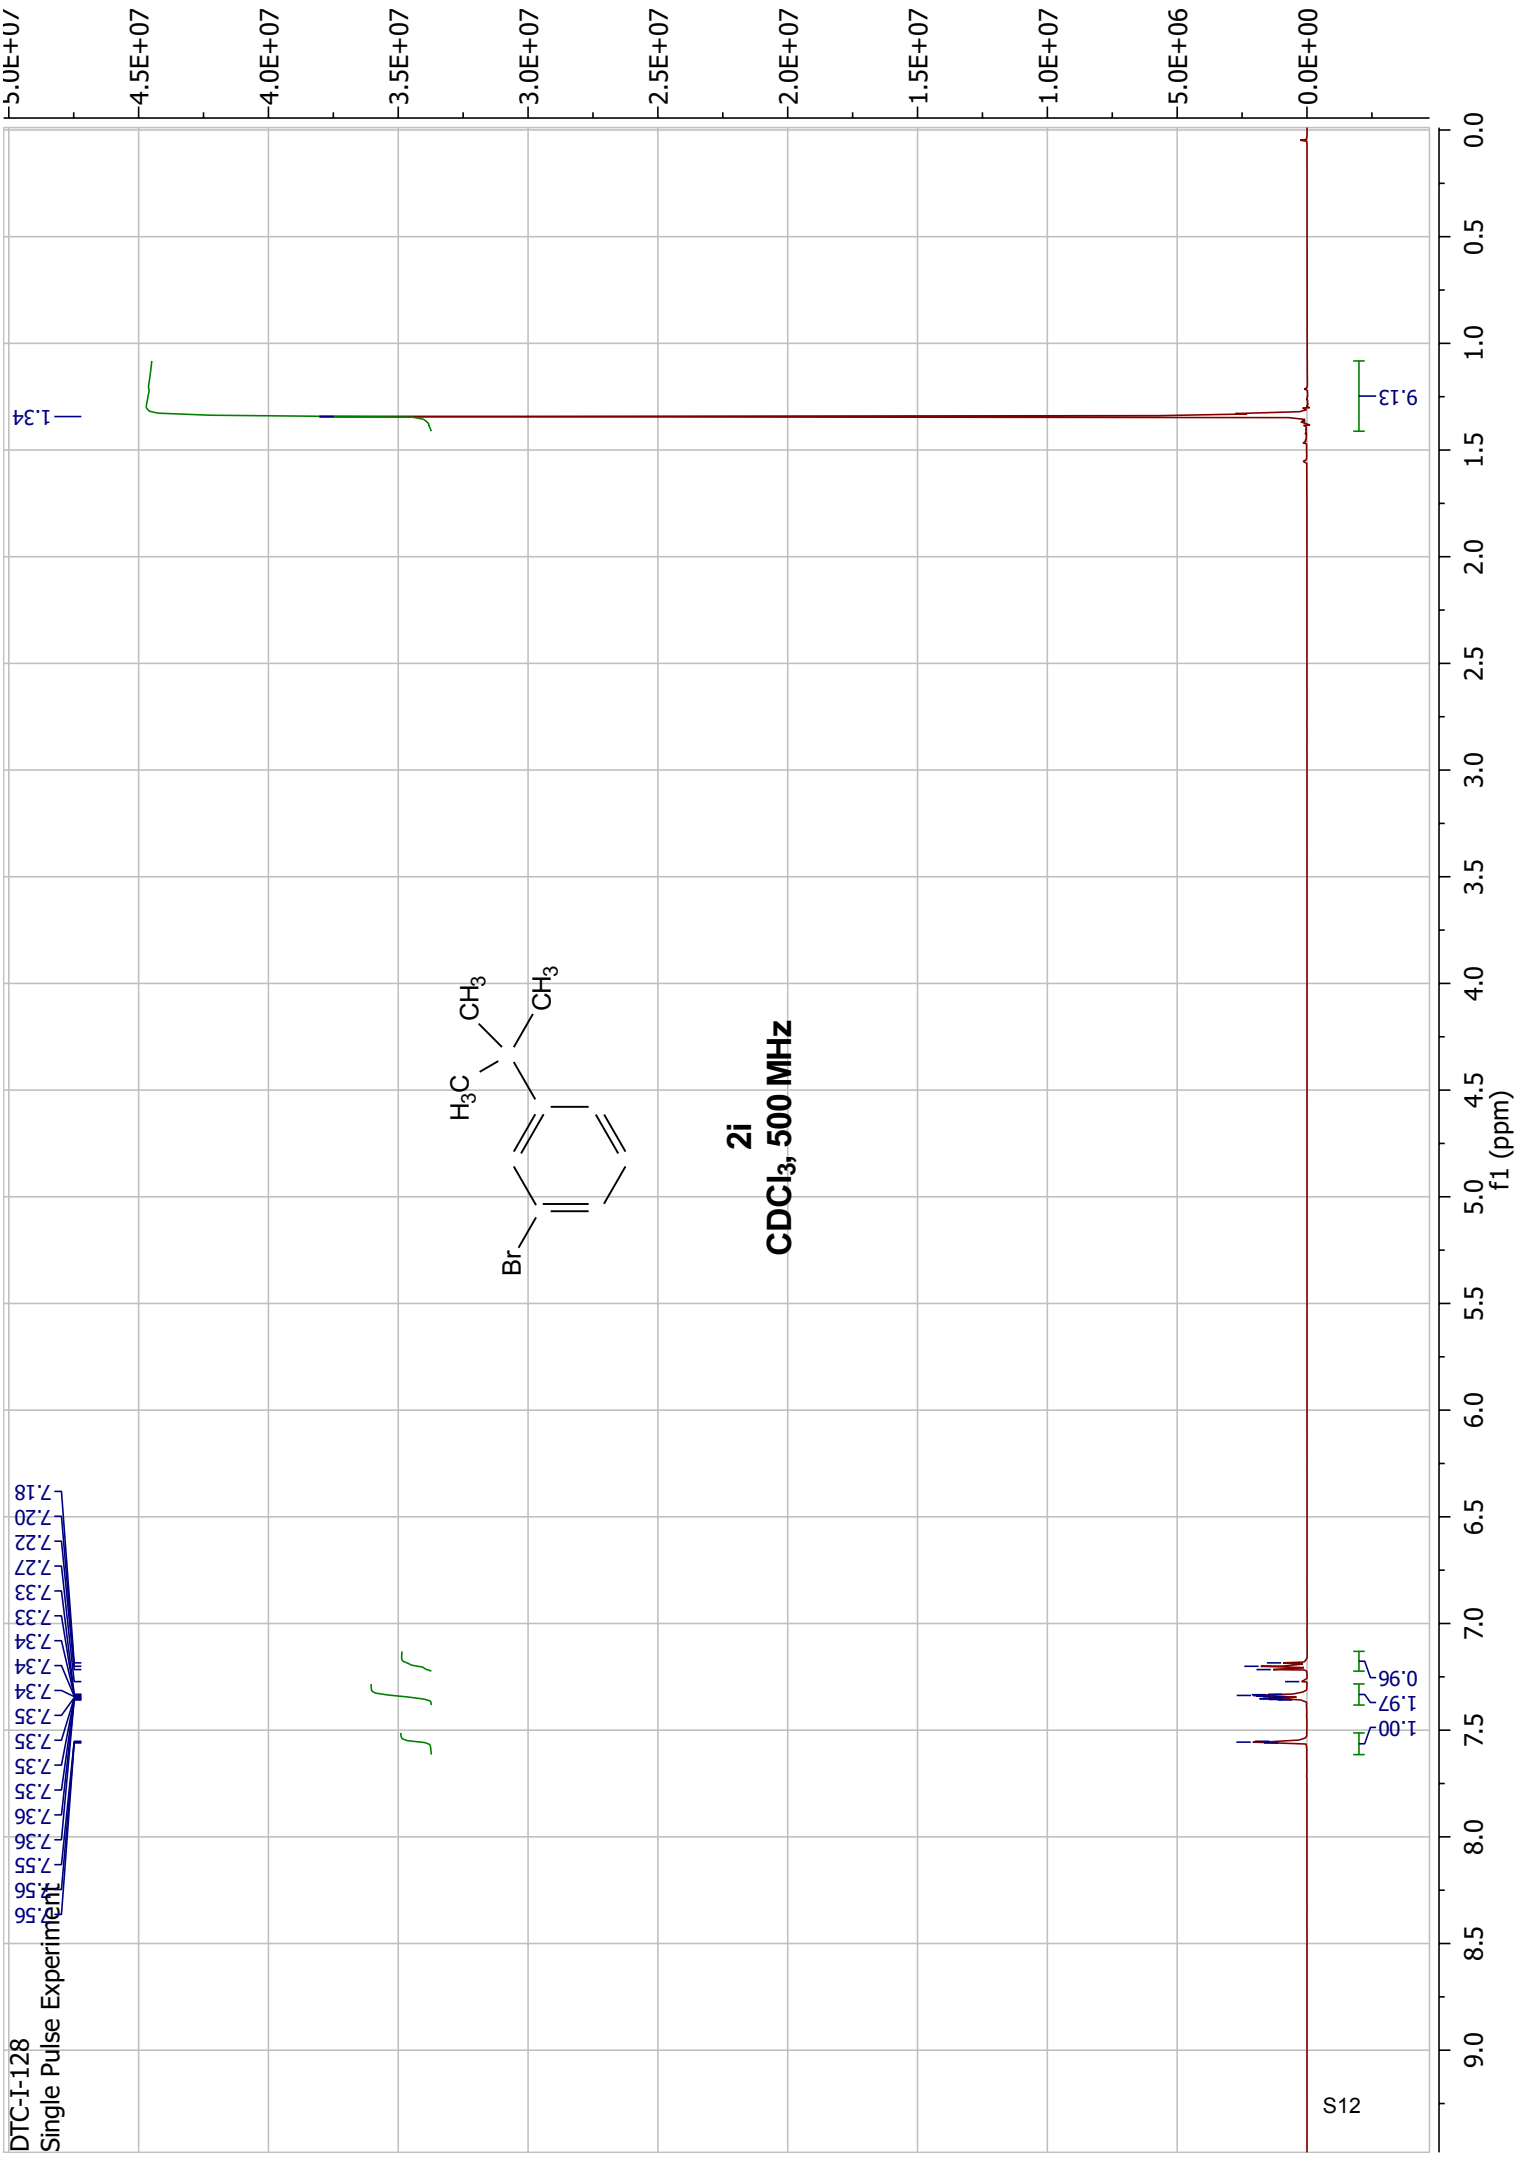

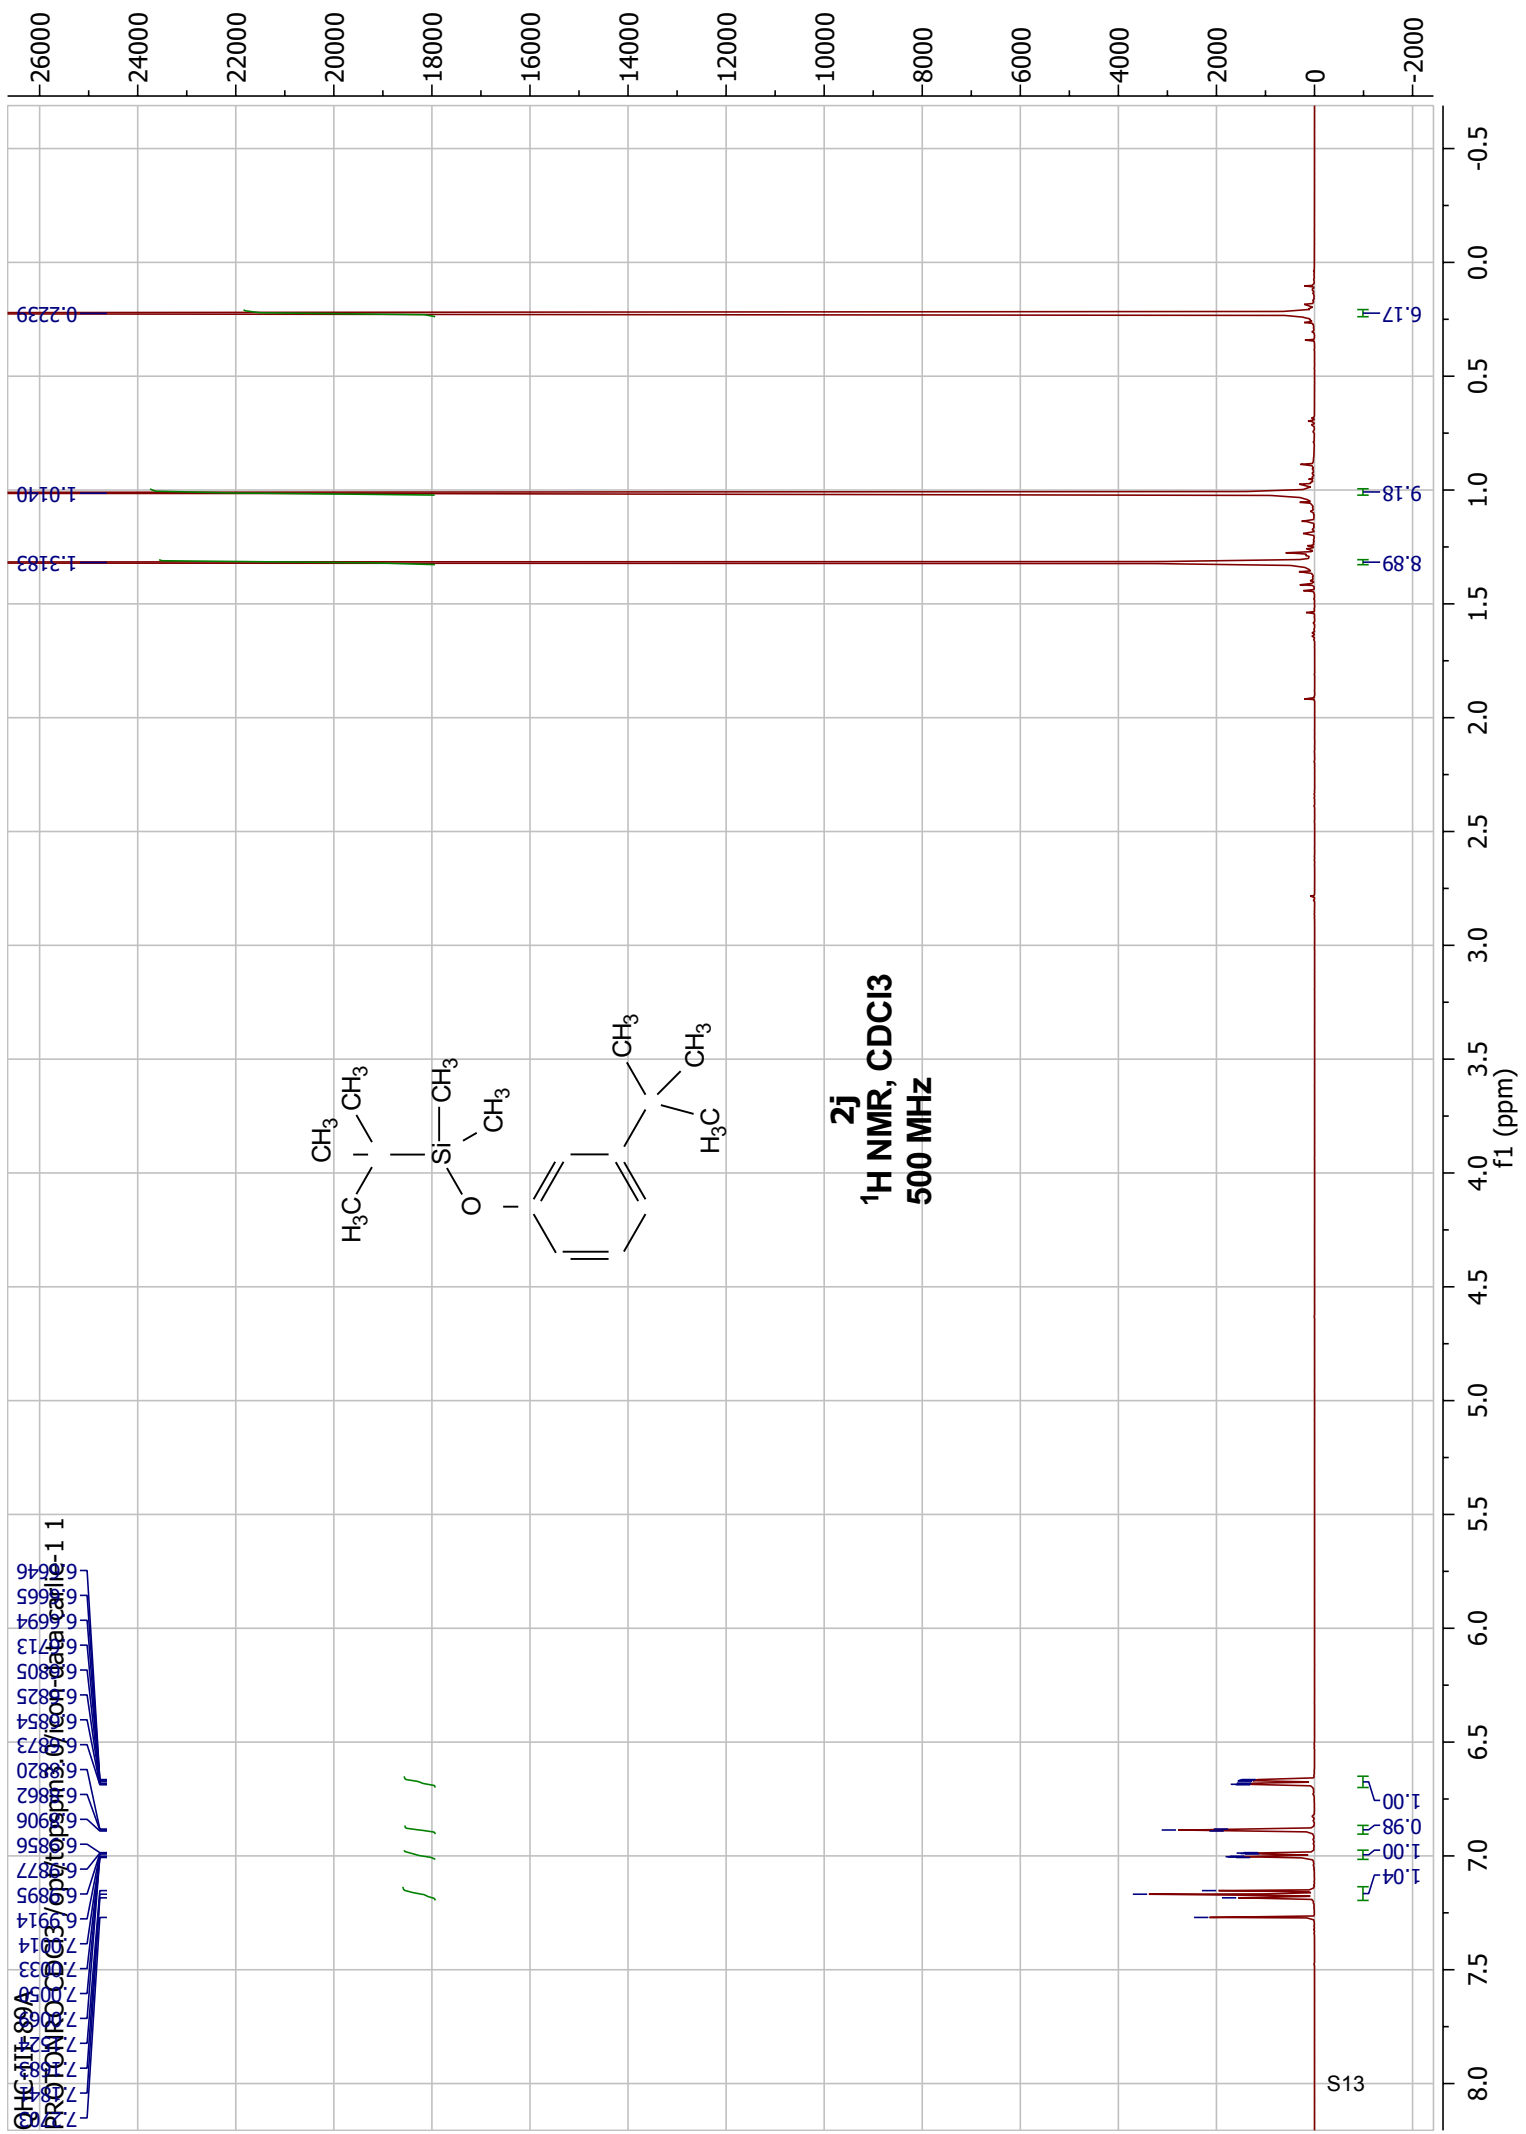

7.0589  
 7.0588  
 7.0587  
 7.0586  
 7.0585  
 7.0584  
 7.0583  
 7.0582  
 7.0581  
 7.0580  
 7.0579  
 7.0578  
 7.0577  
 7.0576  
 7.0575  
 7.0574  
 7.0573  
 7.0572  
 7.0571  
 7.0570  
 7.0569  
 7.0568  
 7.0567  
 7.0566  
 7.0565  
 7.0564  
 7.0563  
 7.0562  
 7.0561  
 7.0560  
 7.0559  
 7.0558  
 7.0557  
 7.0556  
 7.0555  
 7.0554  
 7.0553  
 7.0552  
 7.0551  
 7.0550  
 7.0549  
 7.0548  
 7.0547  
 7.0546  
 7.0545  
 7.0544  
 7.0543  
 7.0542  
 7.0541  
 7.0540  
 7.0539  
 7.0538  
 7.0537  
 7.0536  
 7.0535  
 7.0534  
 7.0533  
 7.0532  
 7.0531  
 7.0530  
 7.0529  
 7.0528  
 7.0527  
 7.0526  
 7.0525  
 7.0524  
 7.0523  
 7.0522  
 7.0521  
 7.0520  
 7.0519  
 7.0518  
 7.0517  
 7.0516  
 7.0515  
 7.0514  
 7.0513  
 7.0512  
 7.0511  
 7.0510  
 7.0509  
 7.0508  
 7.0507  
 7.0506  
 7.0505  
 7.0504  
 7.0503  
 7.0502  
 7.0501  
 7.0500  
 6.9914  
 6.895  
 6.877  
 6.856  
 6.906  
 6.862  
 6.820  
 6.873  
 6.854  
 6.825  
 6.805  
 6.713  
 6.694  
 6.665  
 6.646

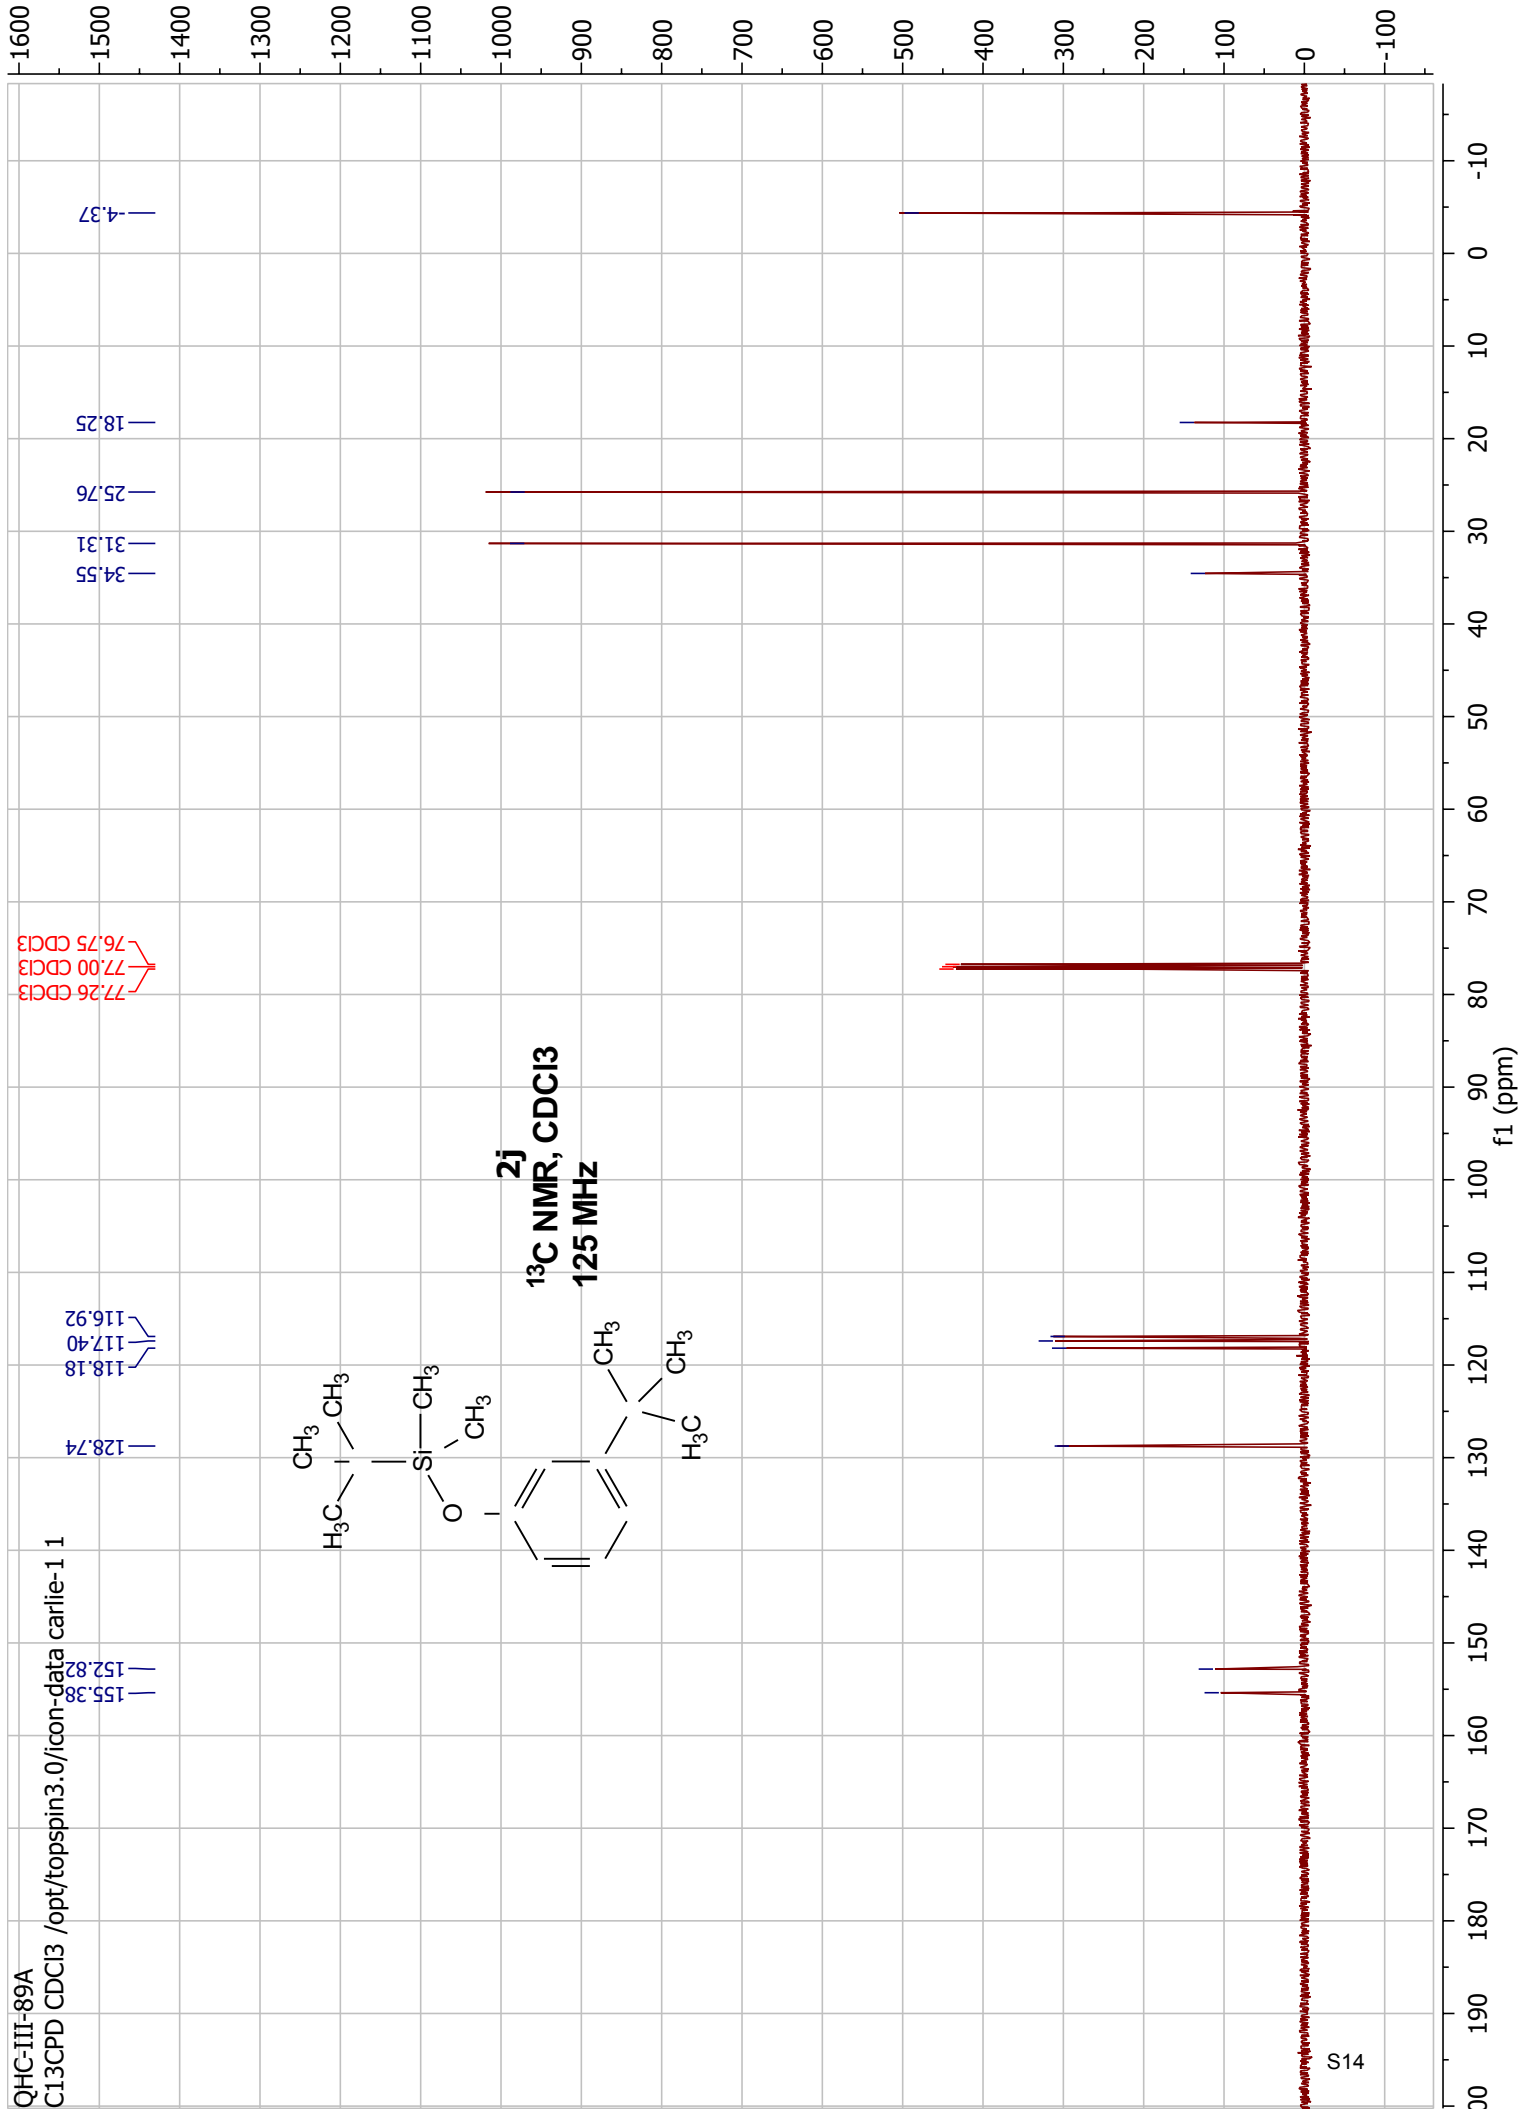

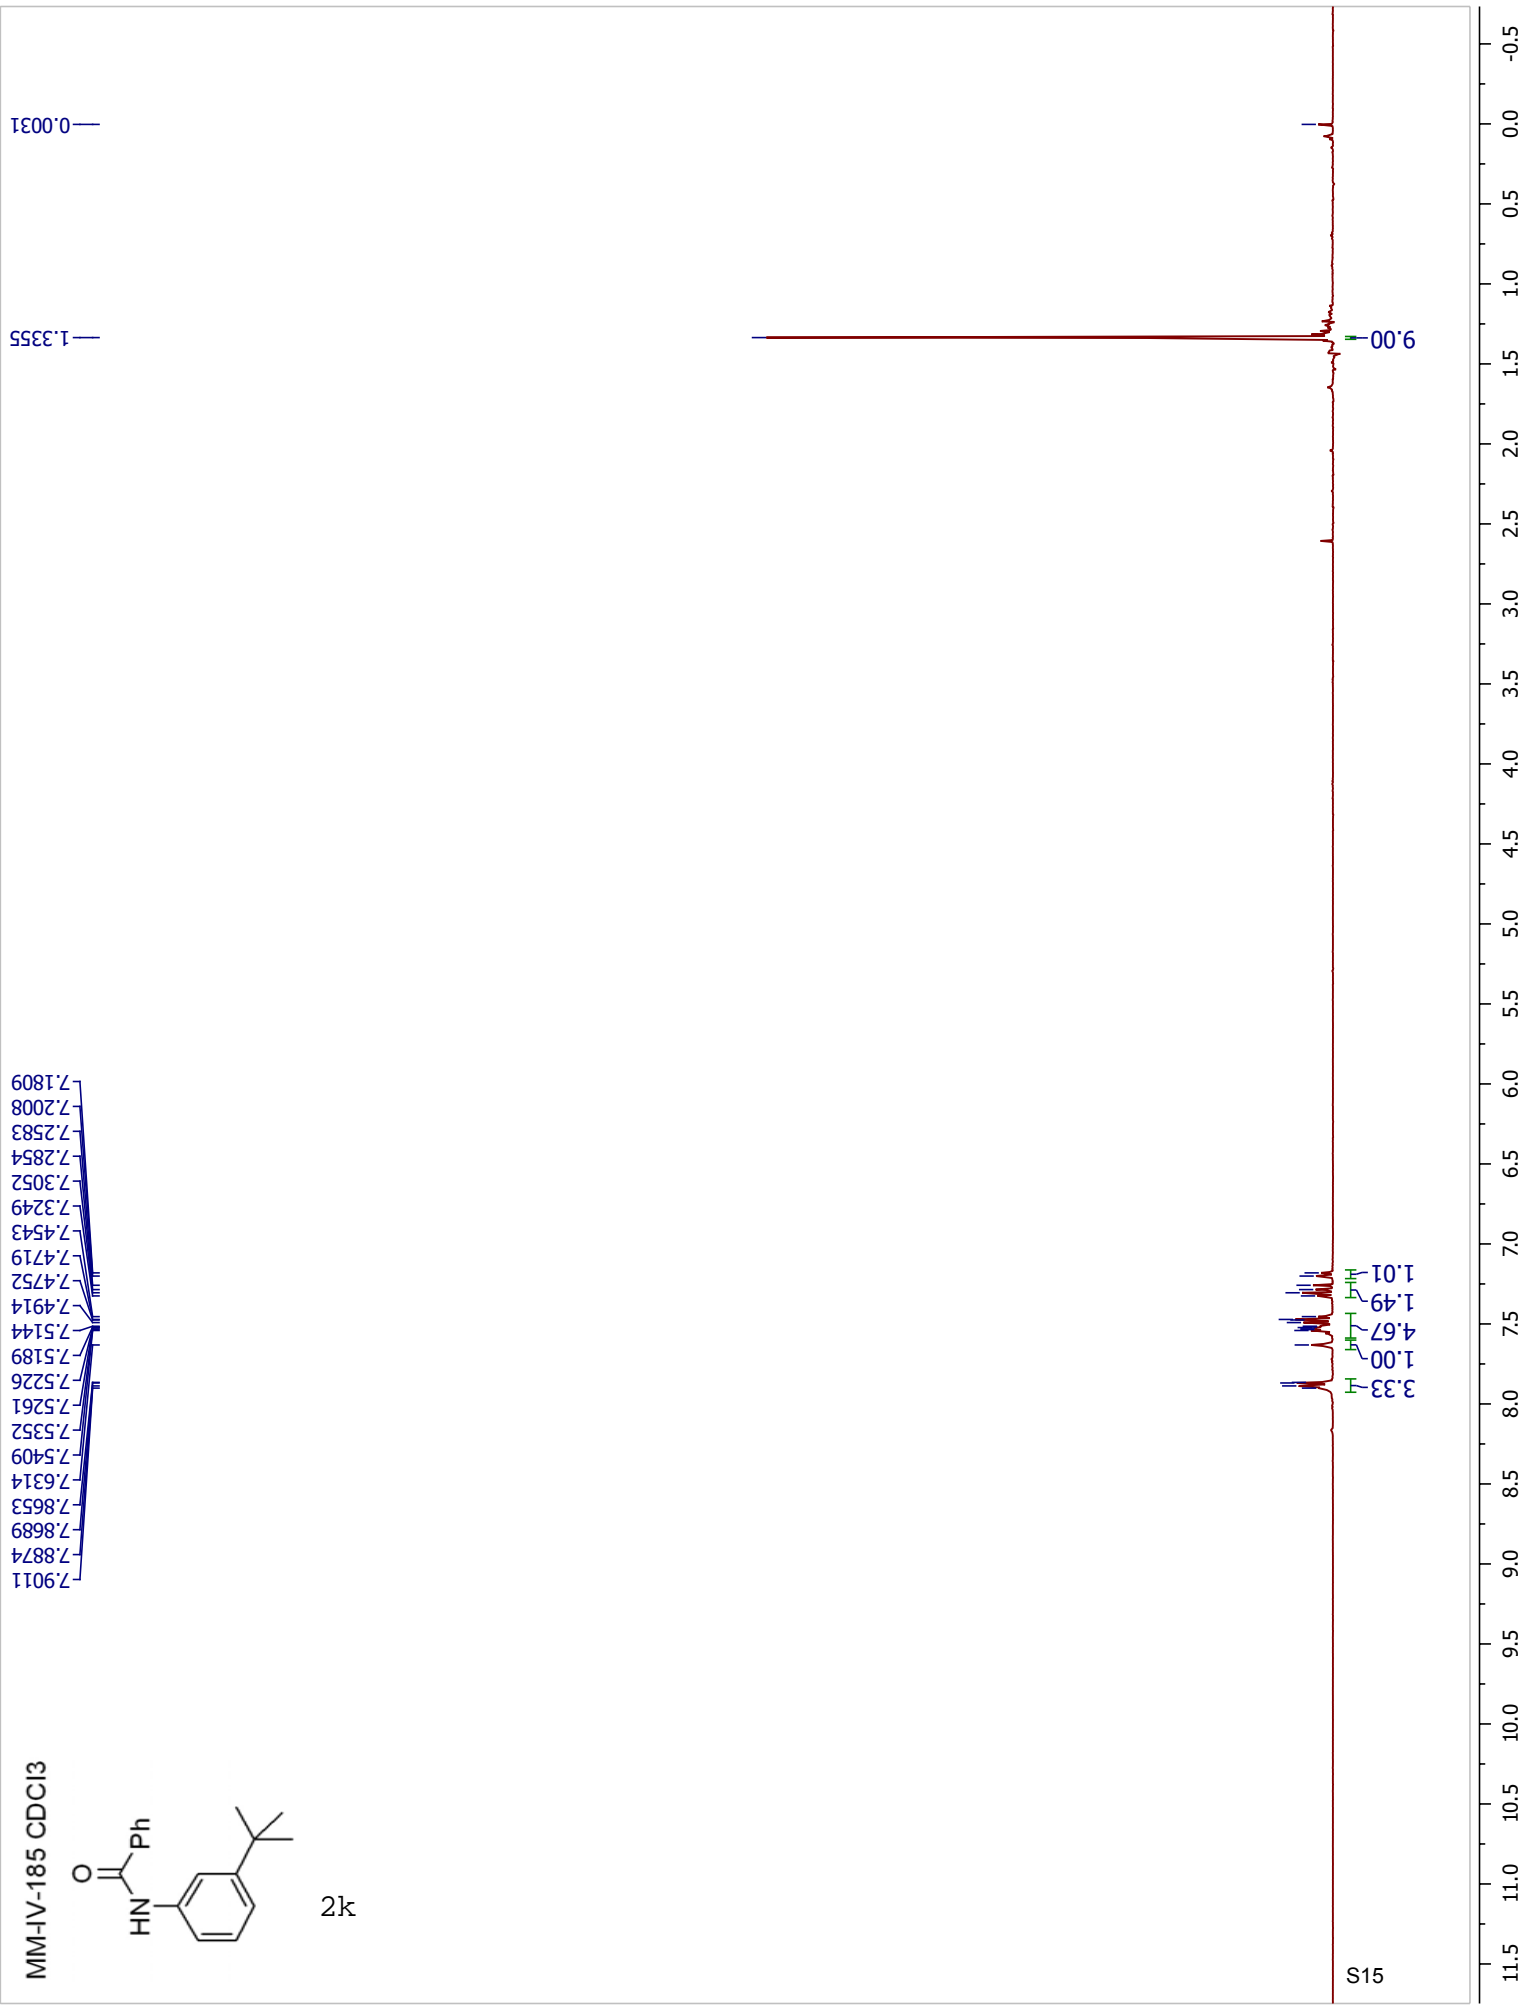

MM-V-185 CDCl<sub>3</sub>

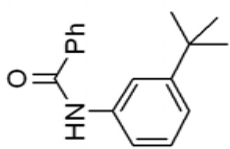

2k

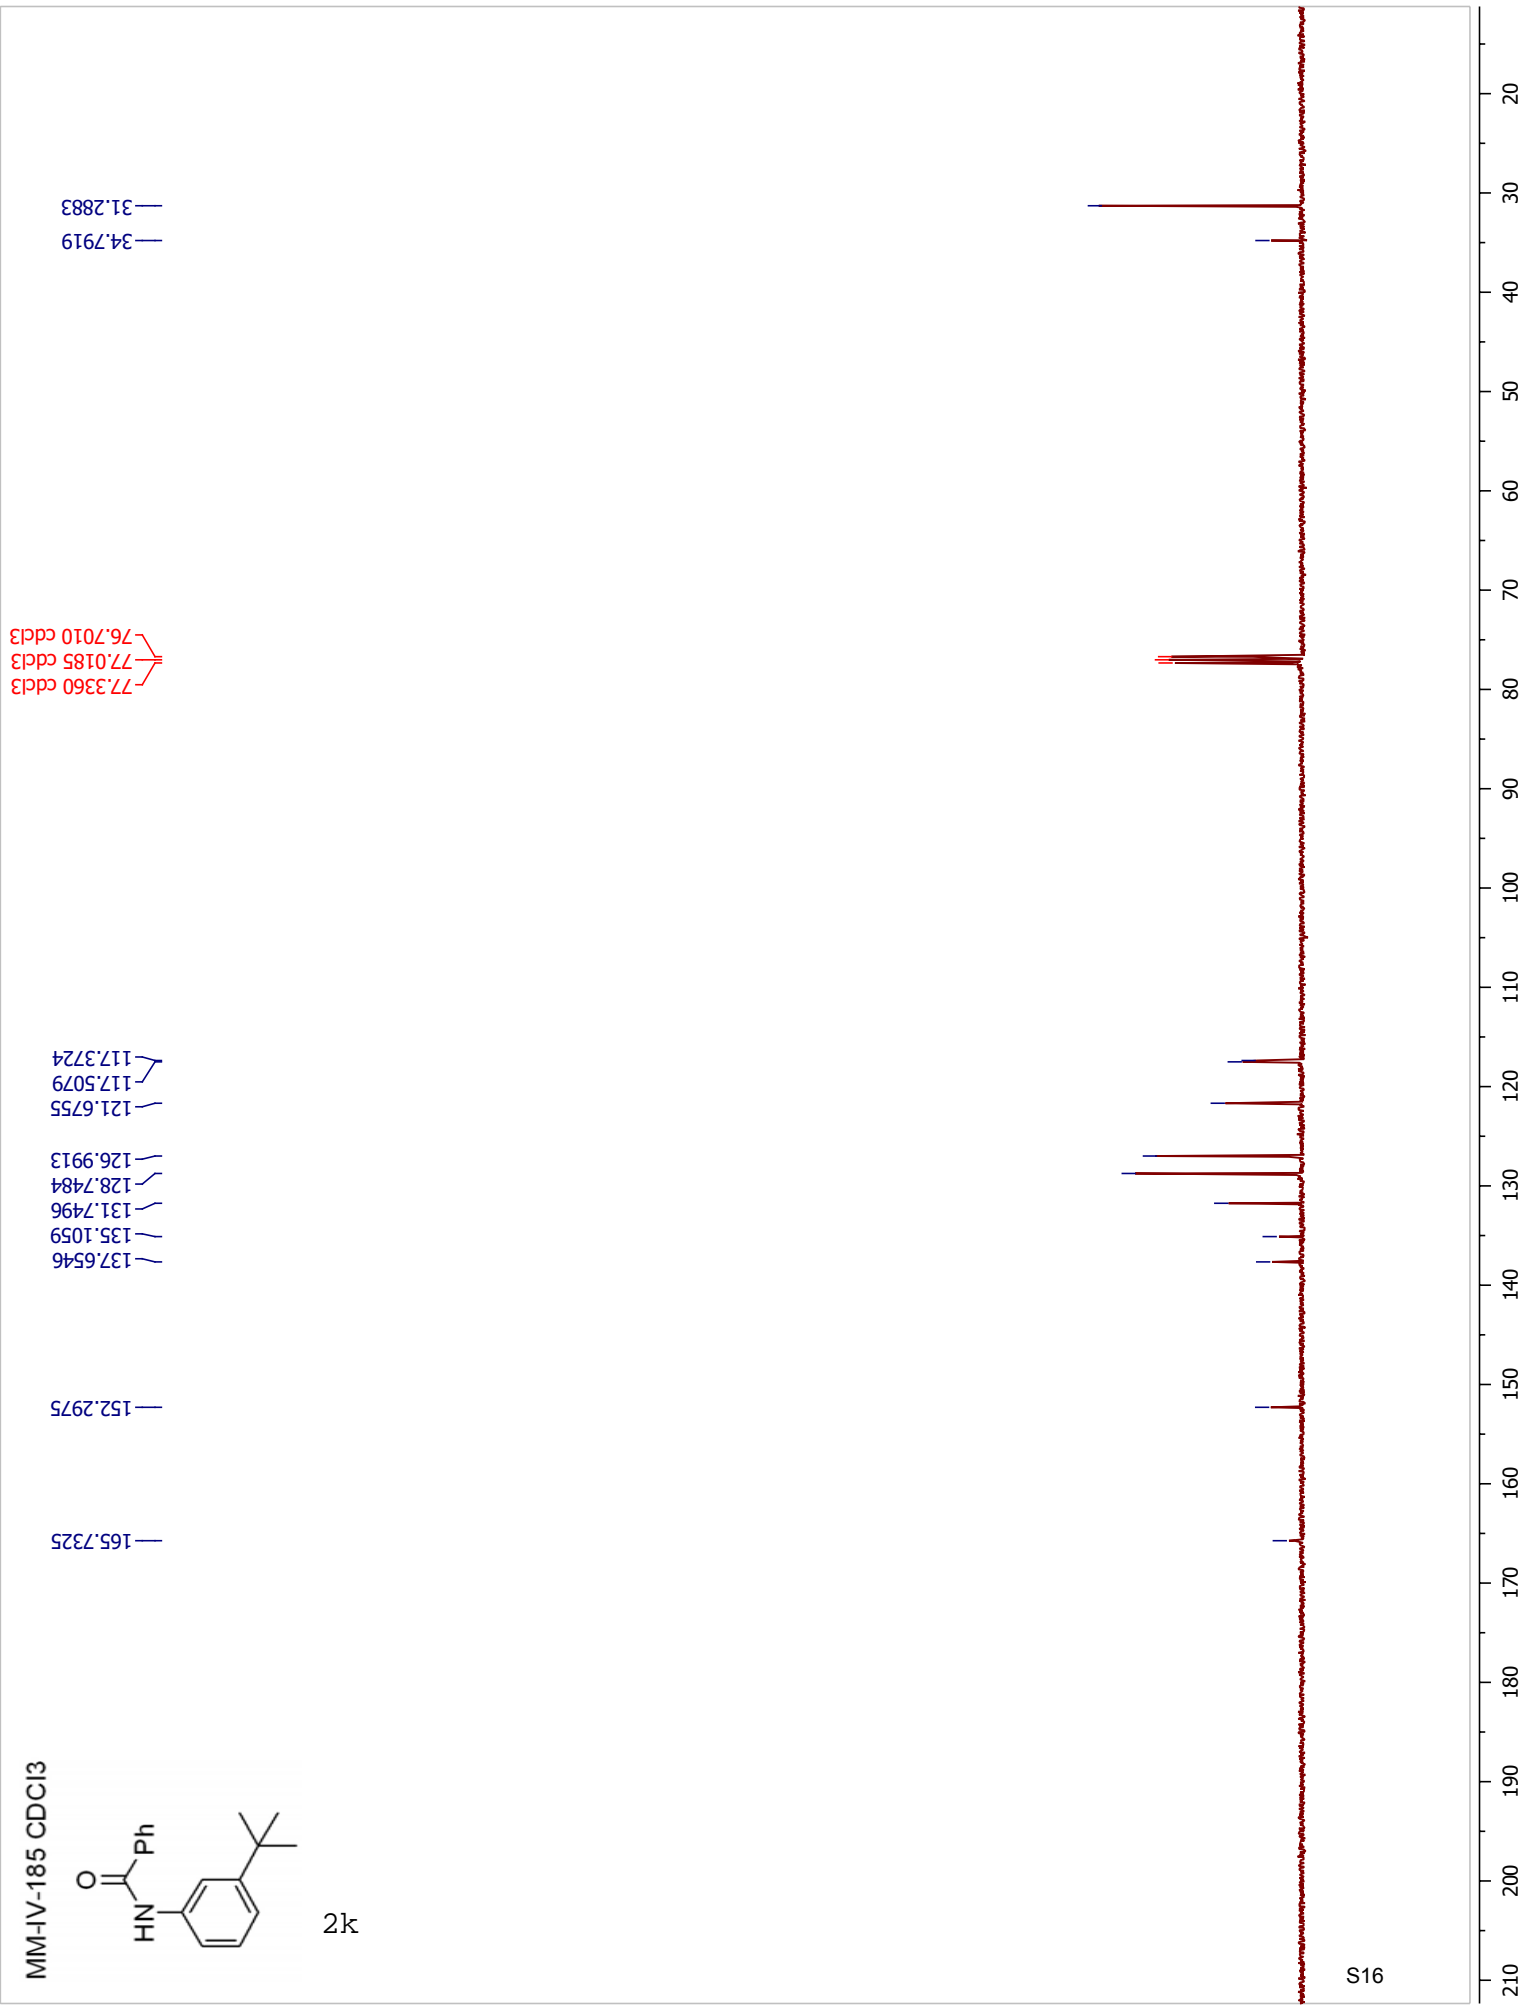



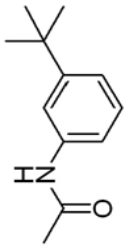

21

MM-V-15-2 500M

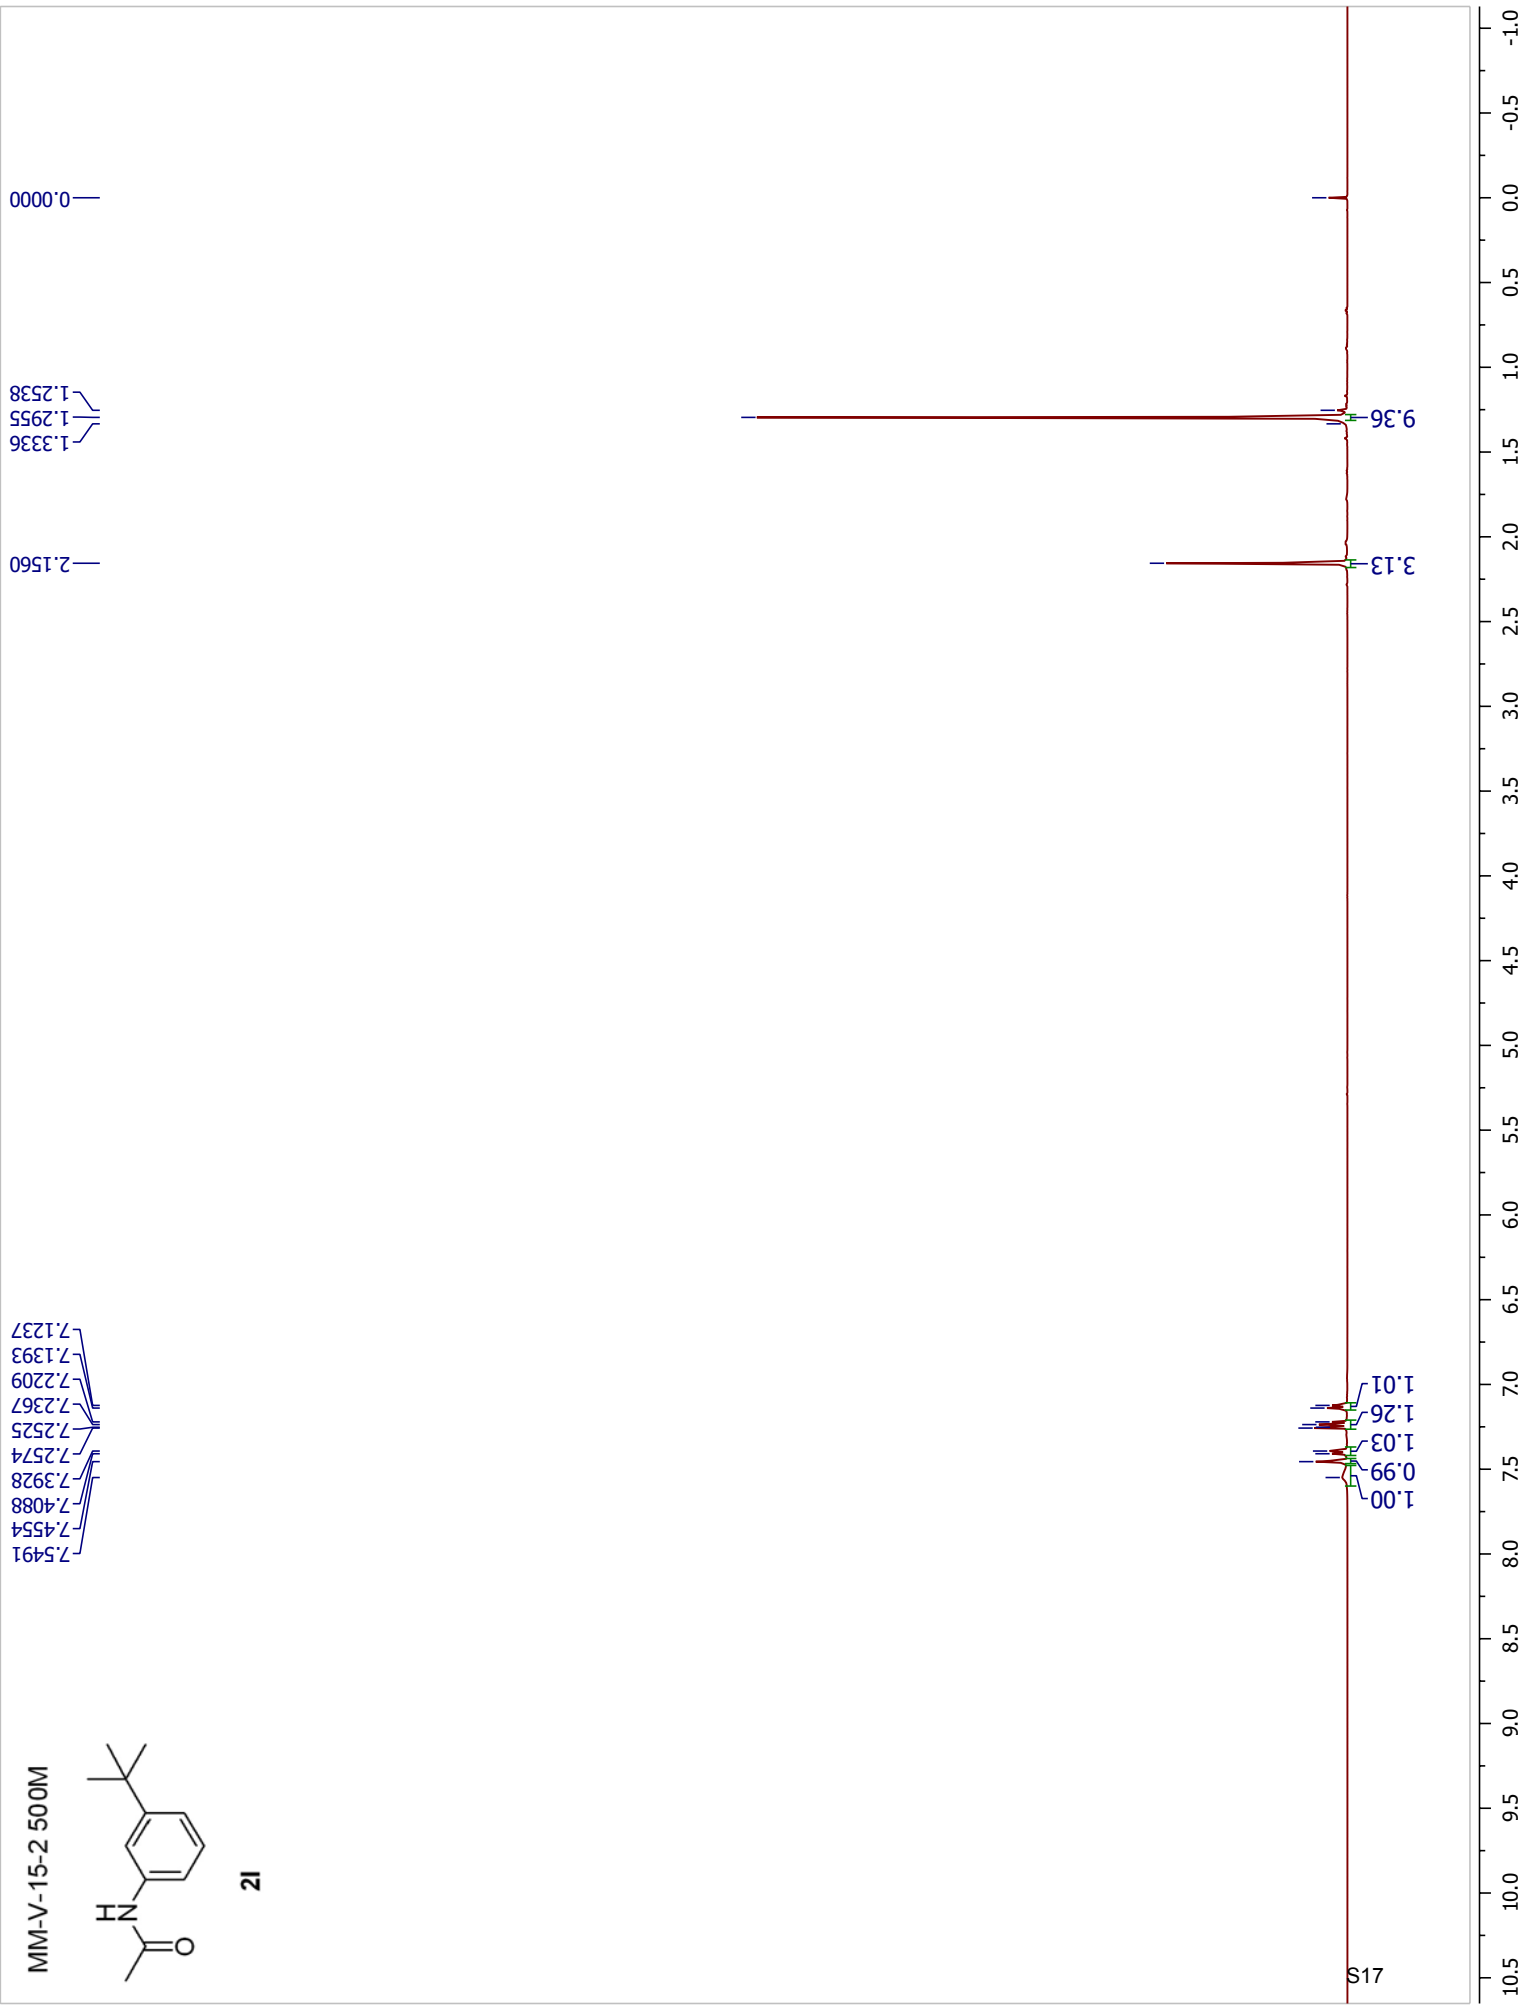

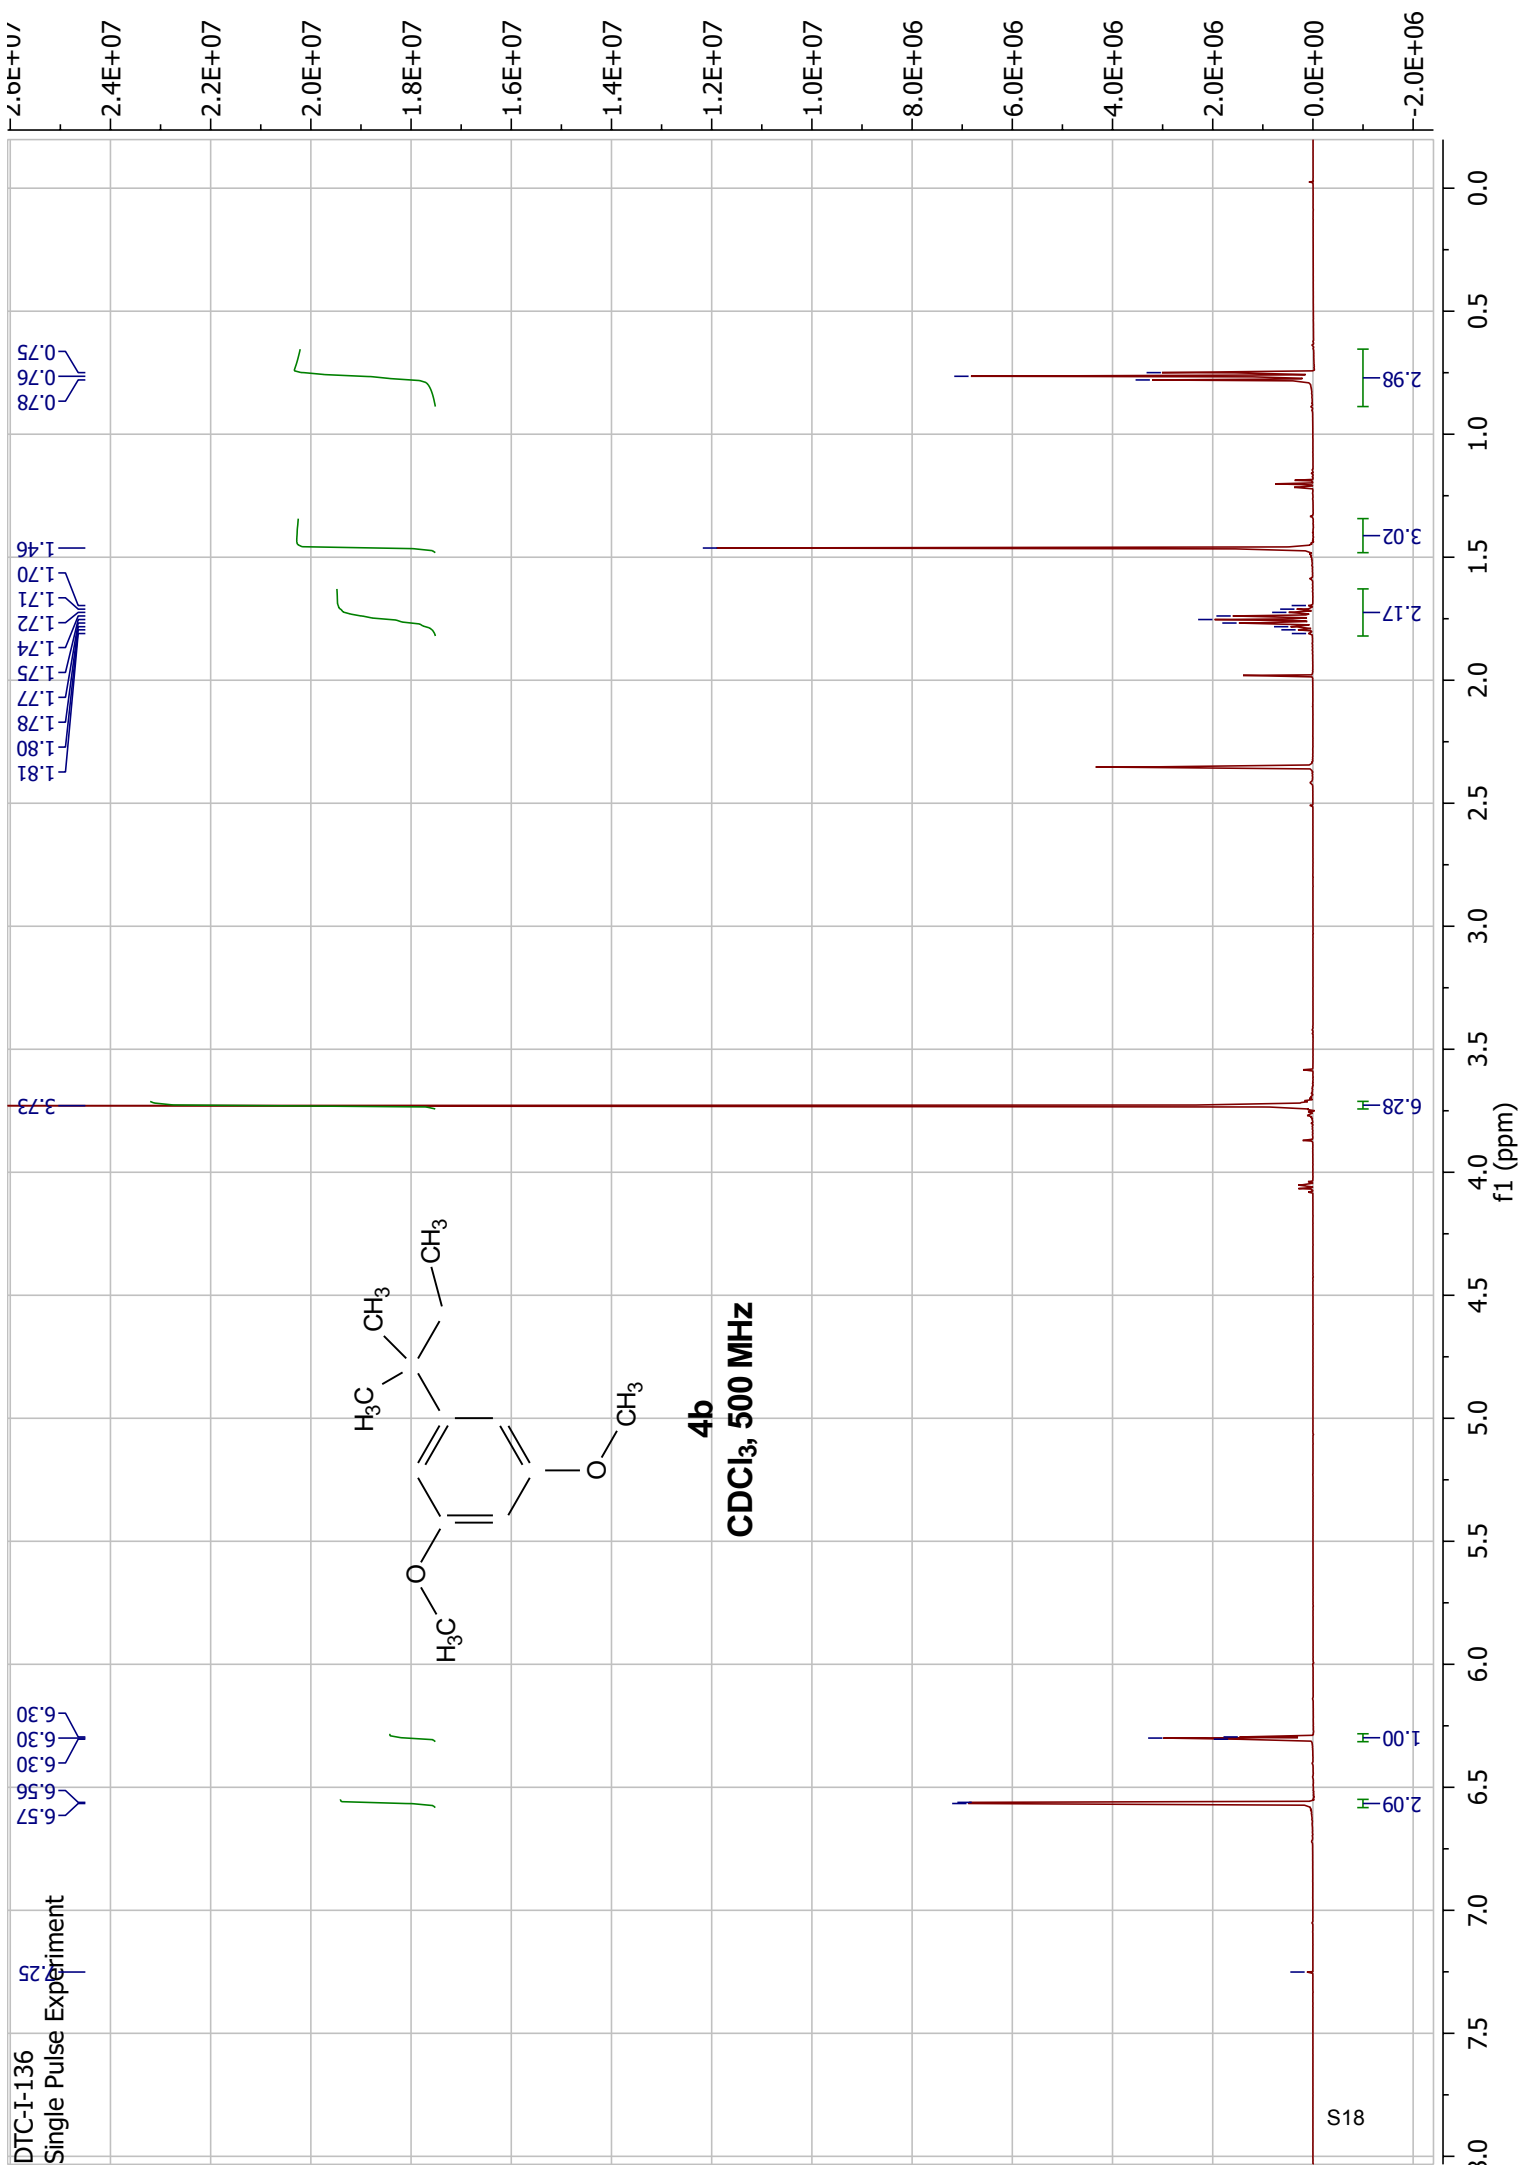

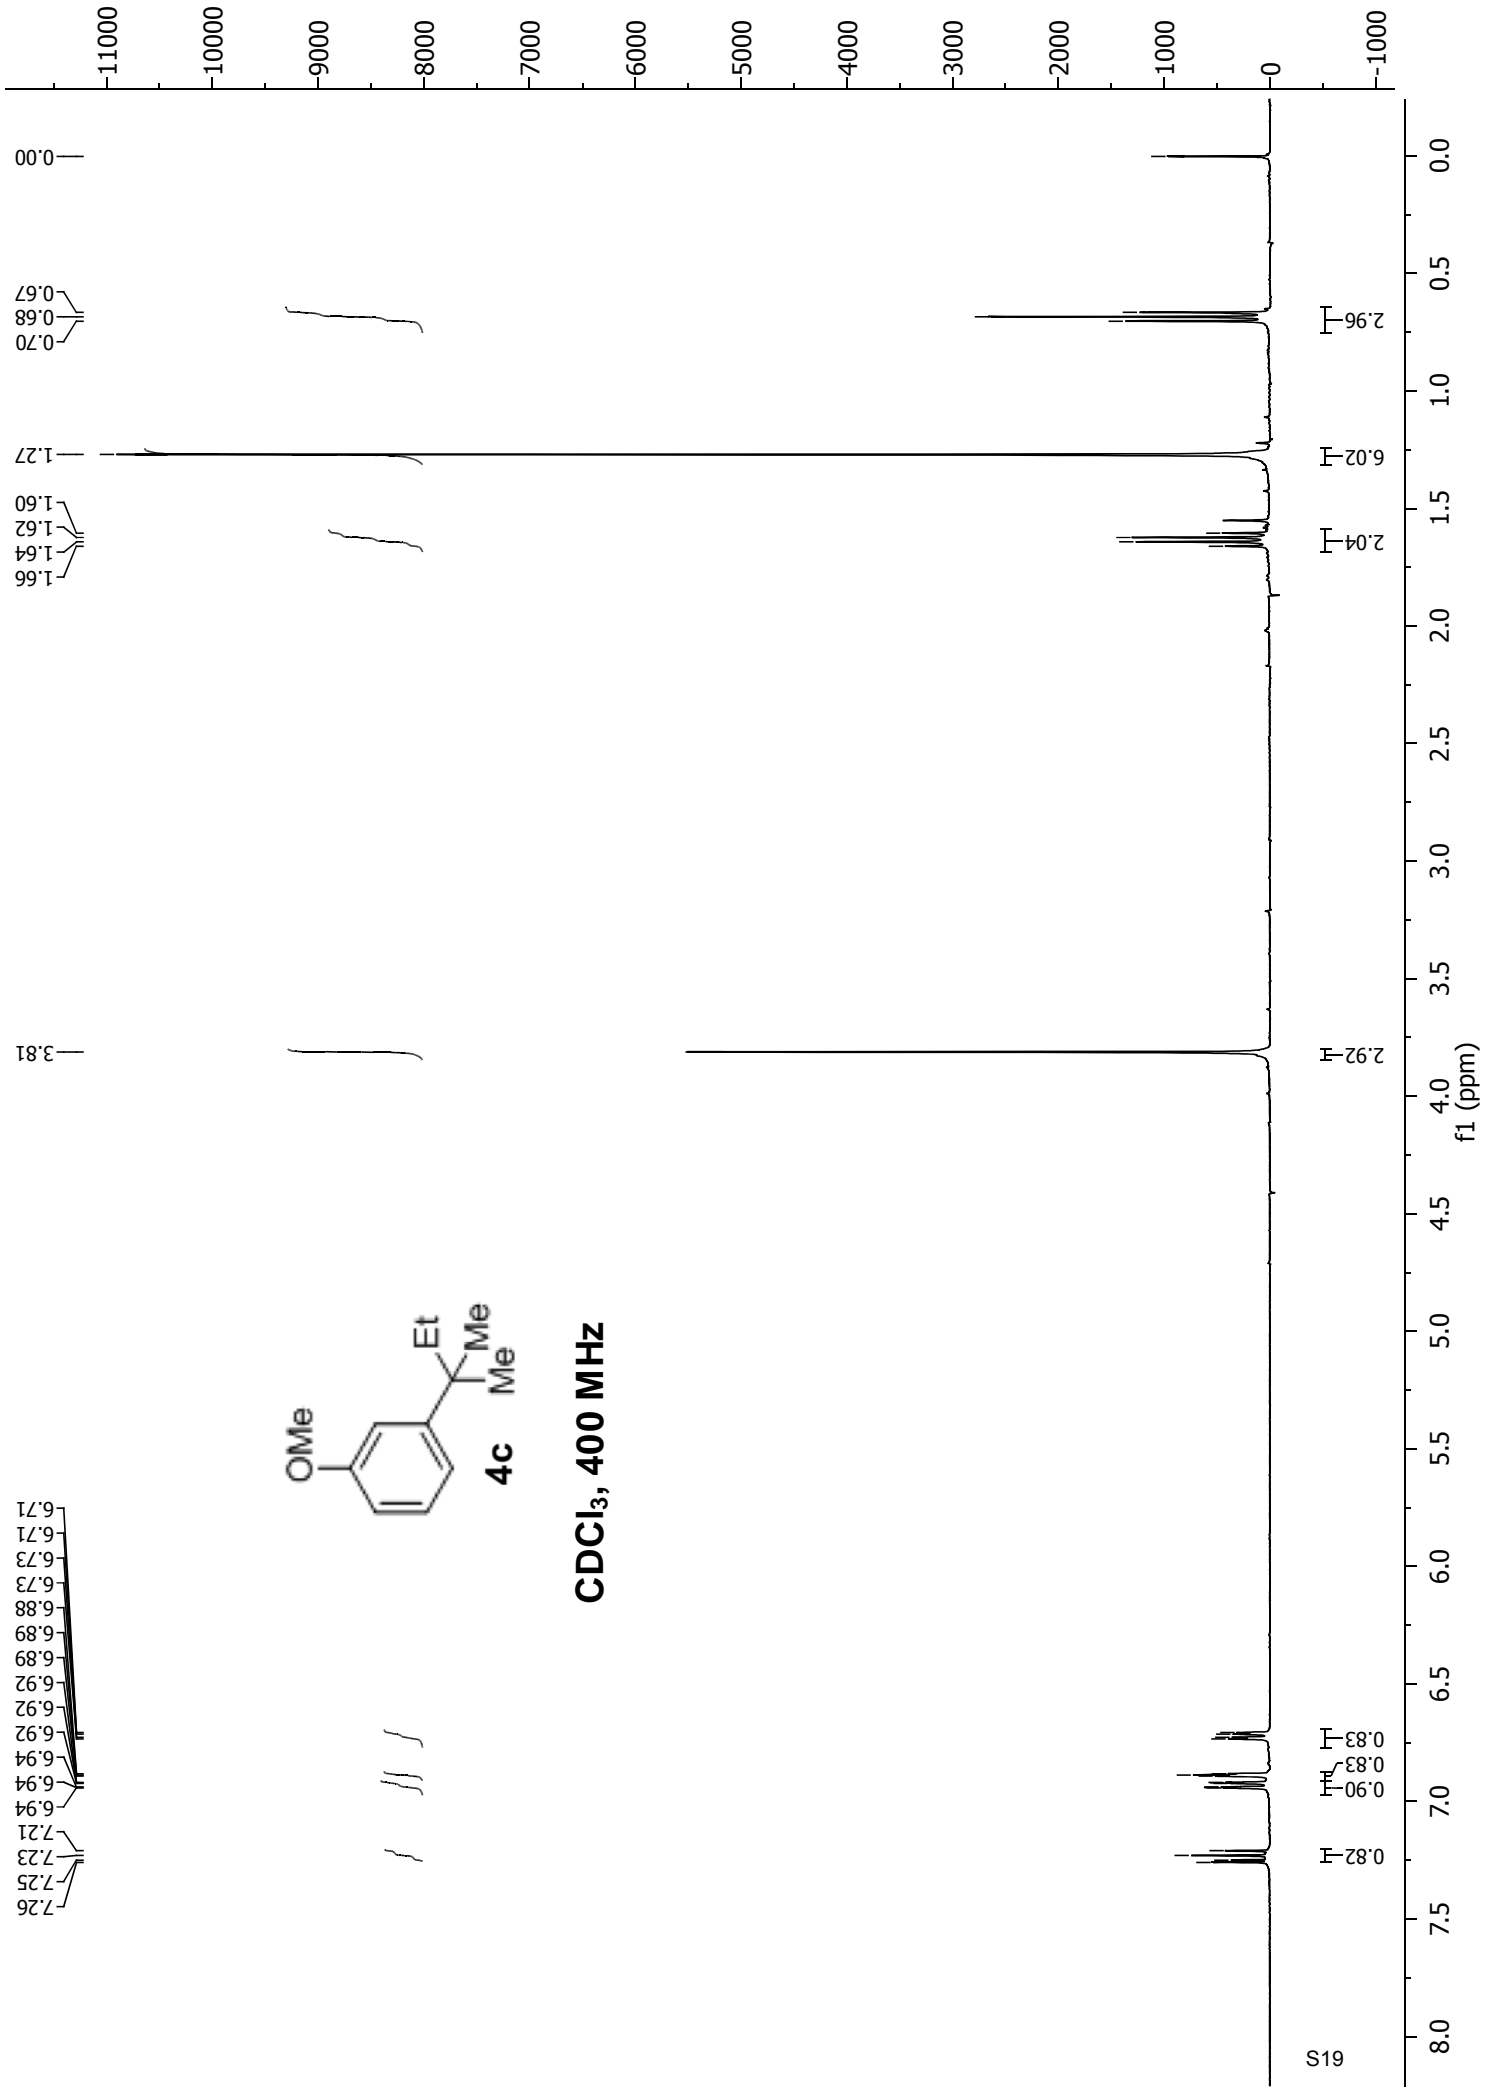

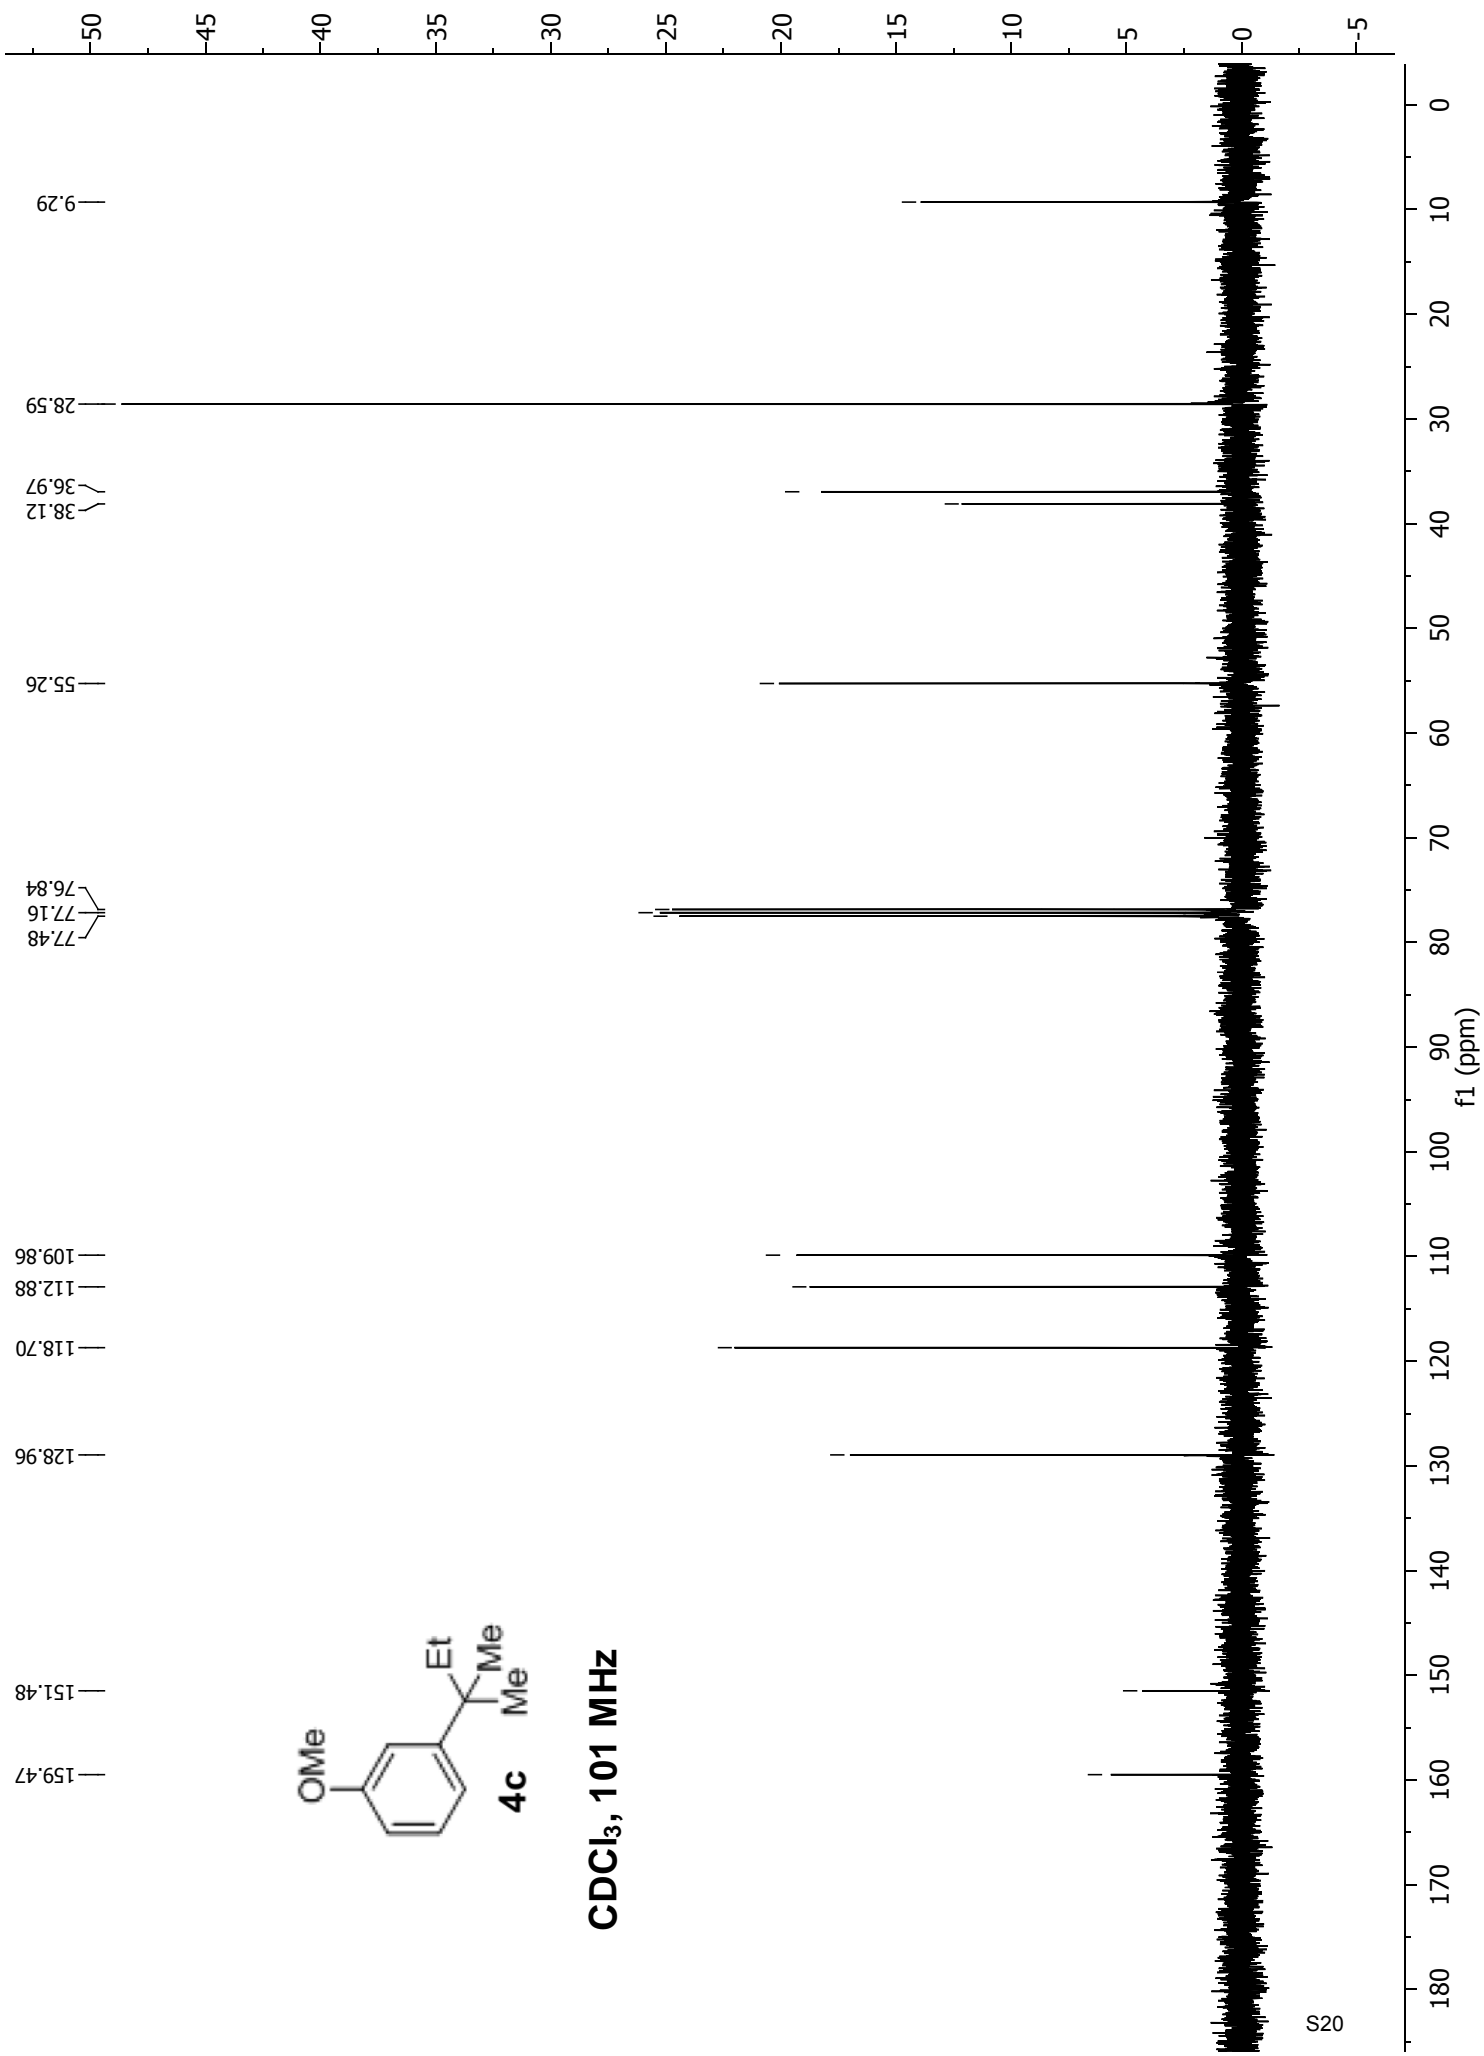

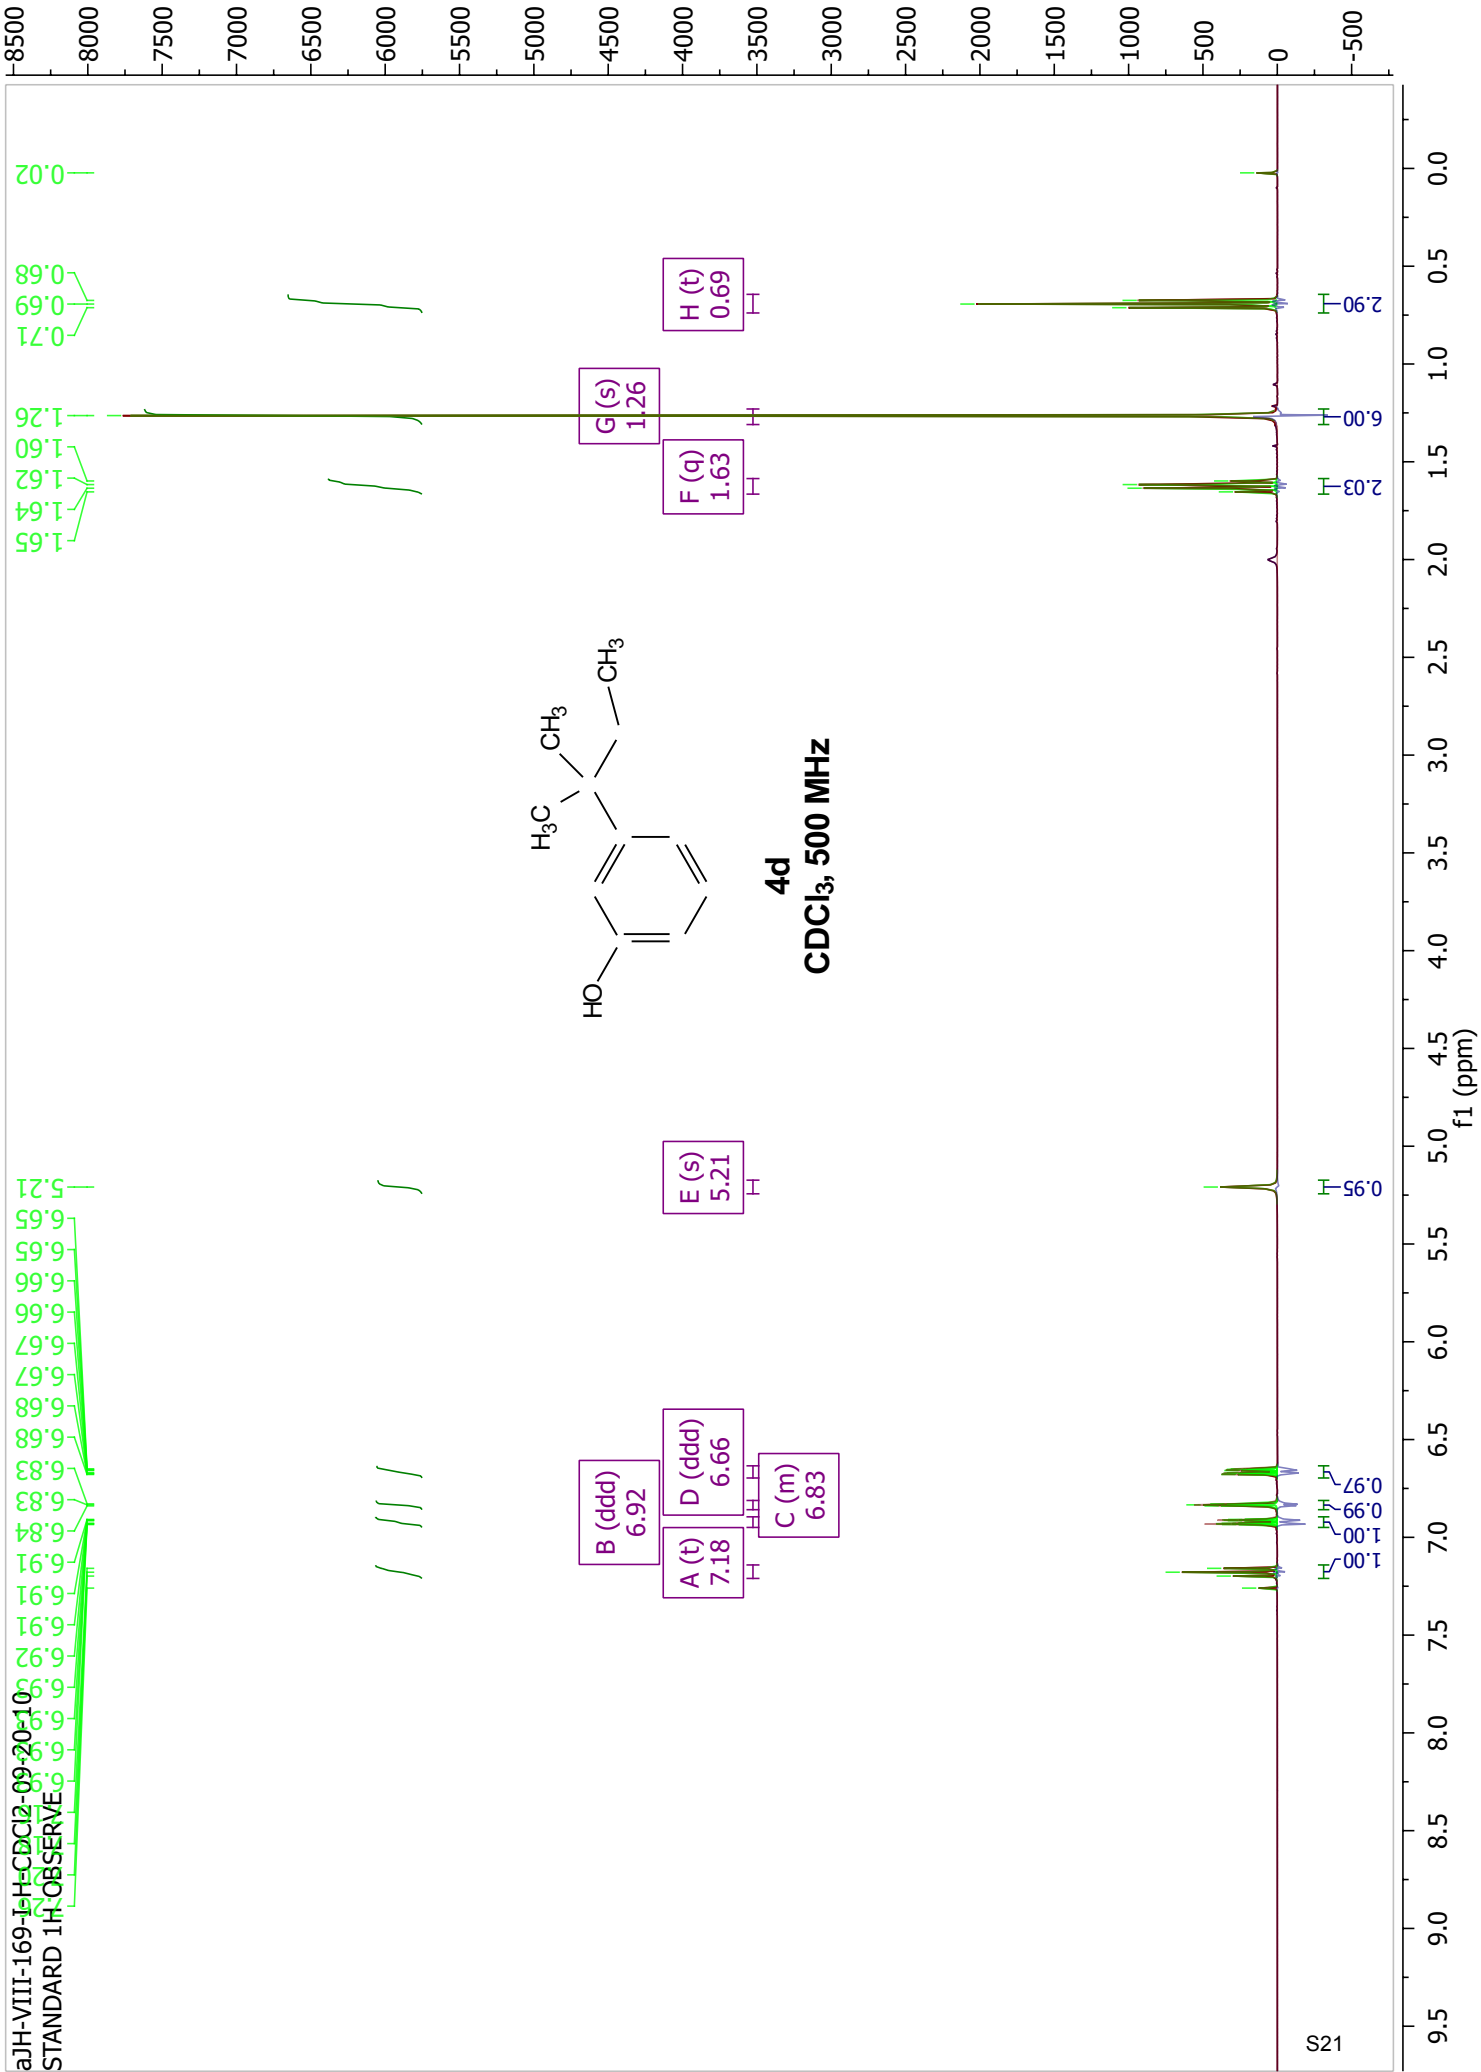

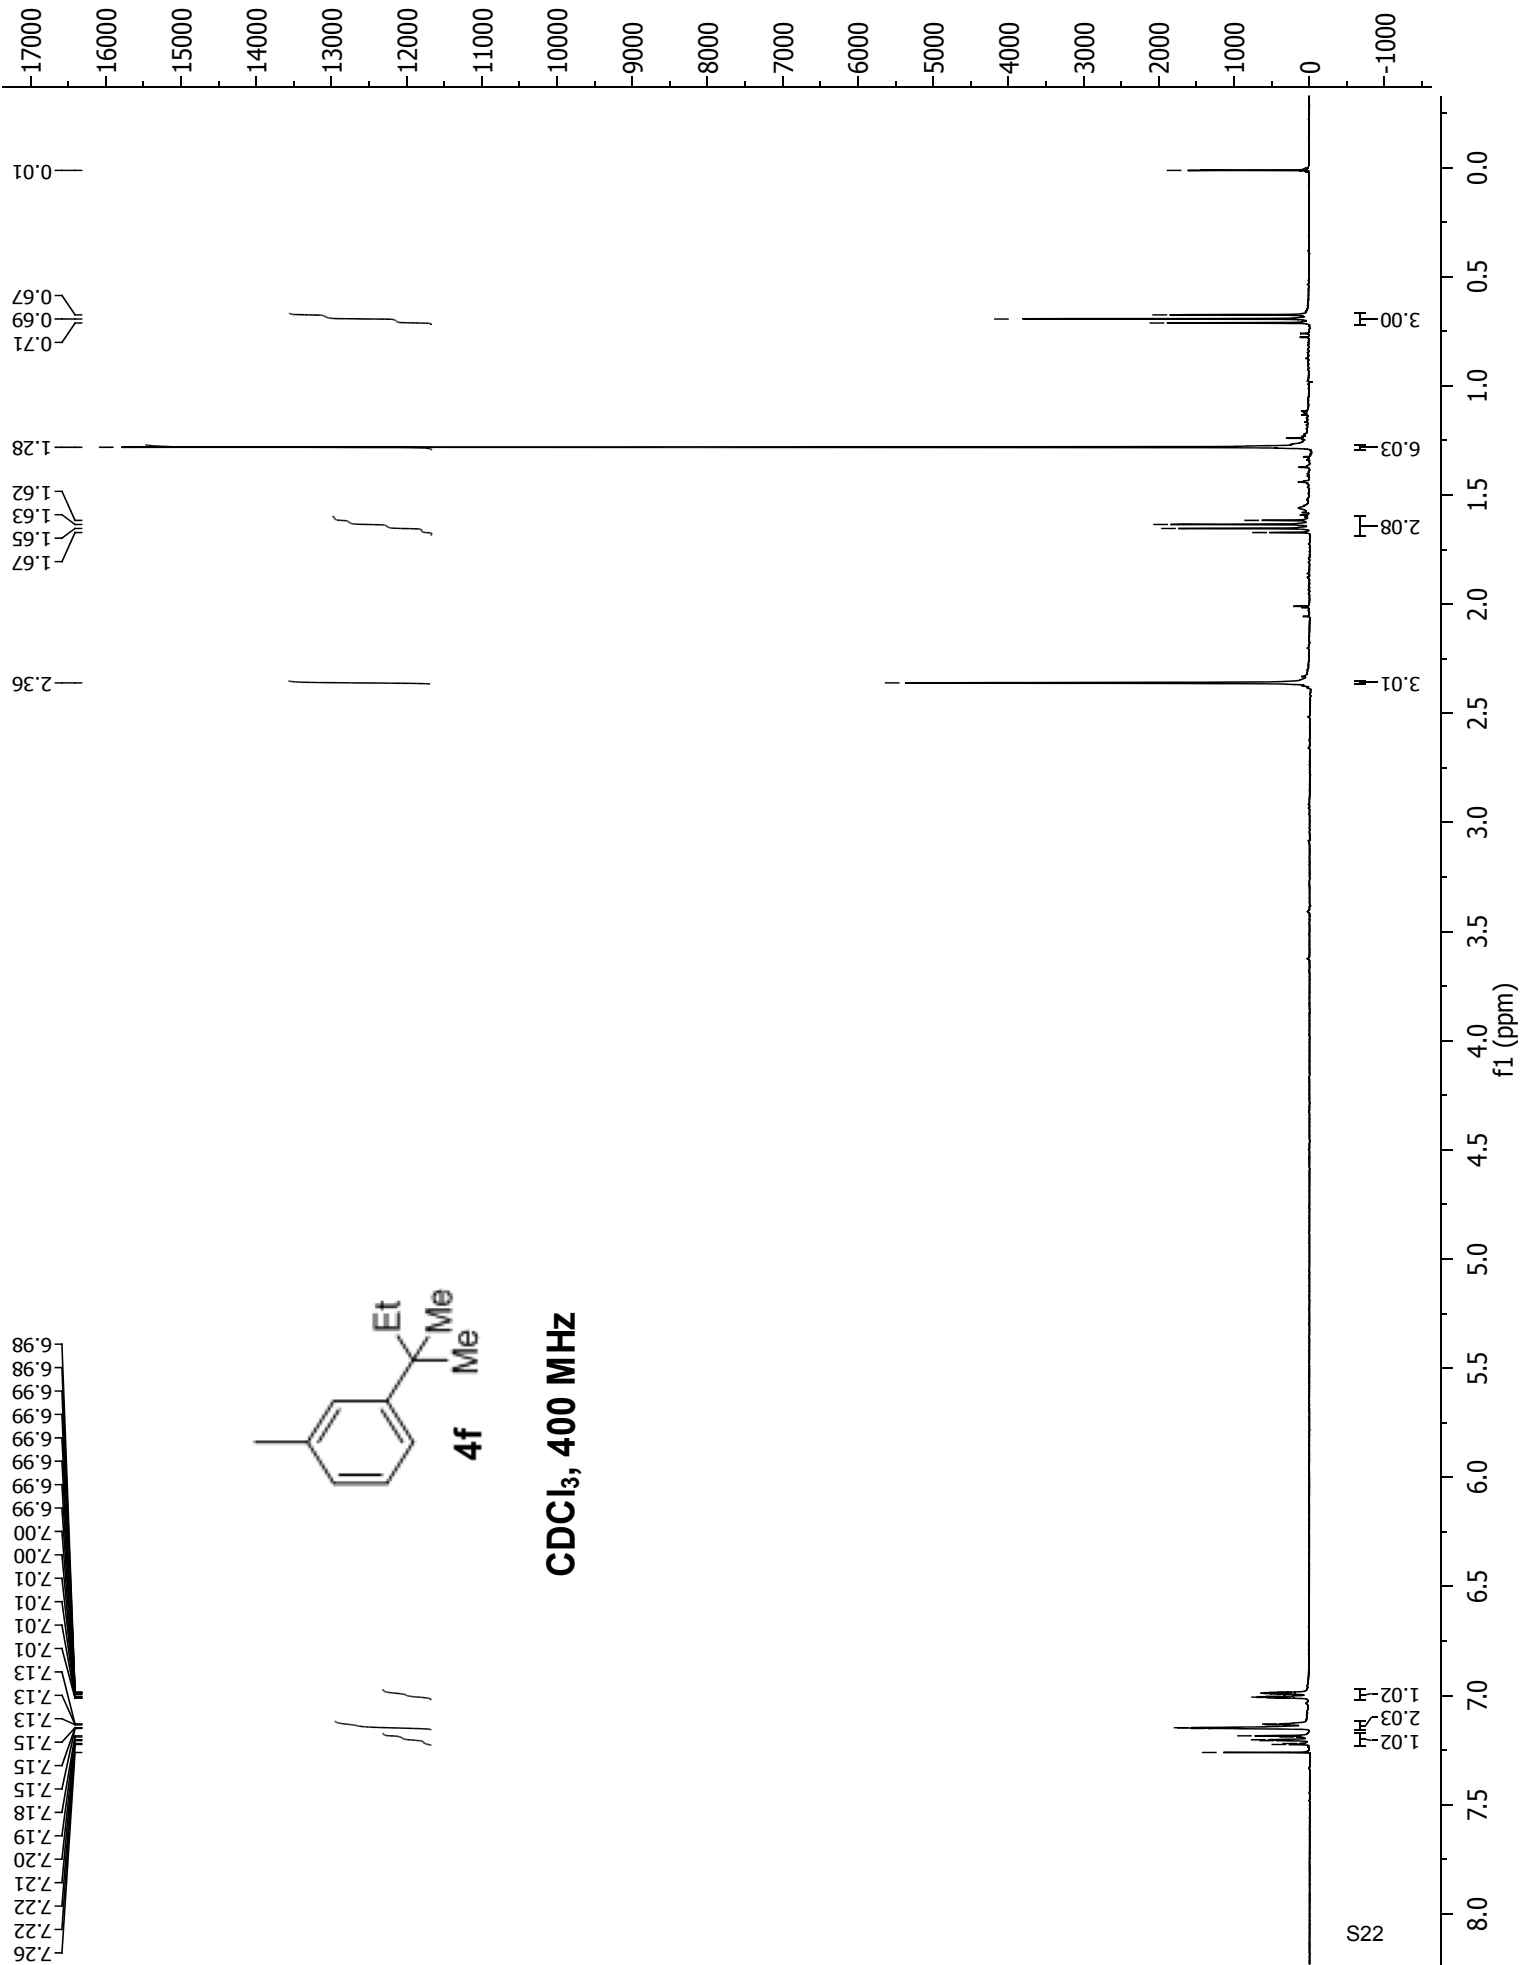

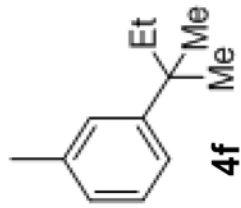

**CDCl<sub>3</sub>, 101 MHz**

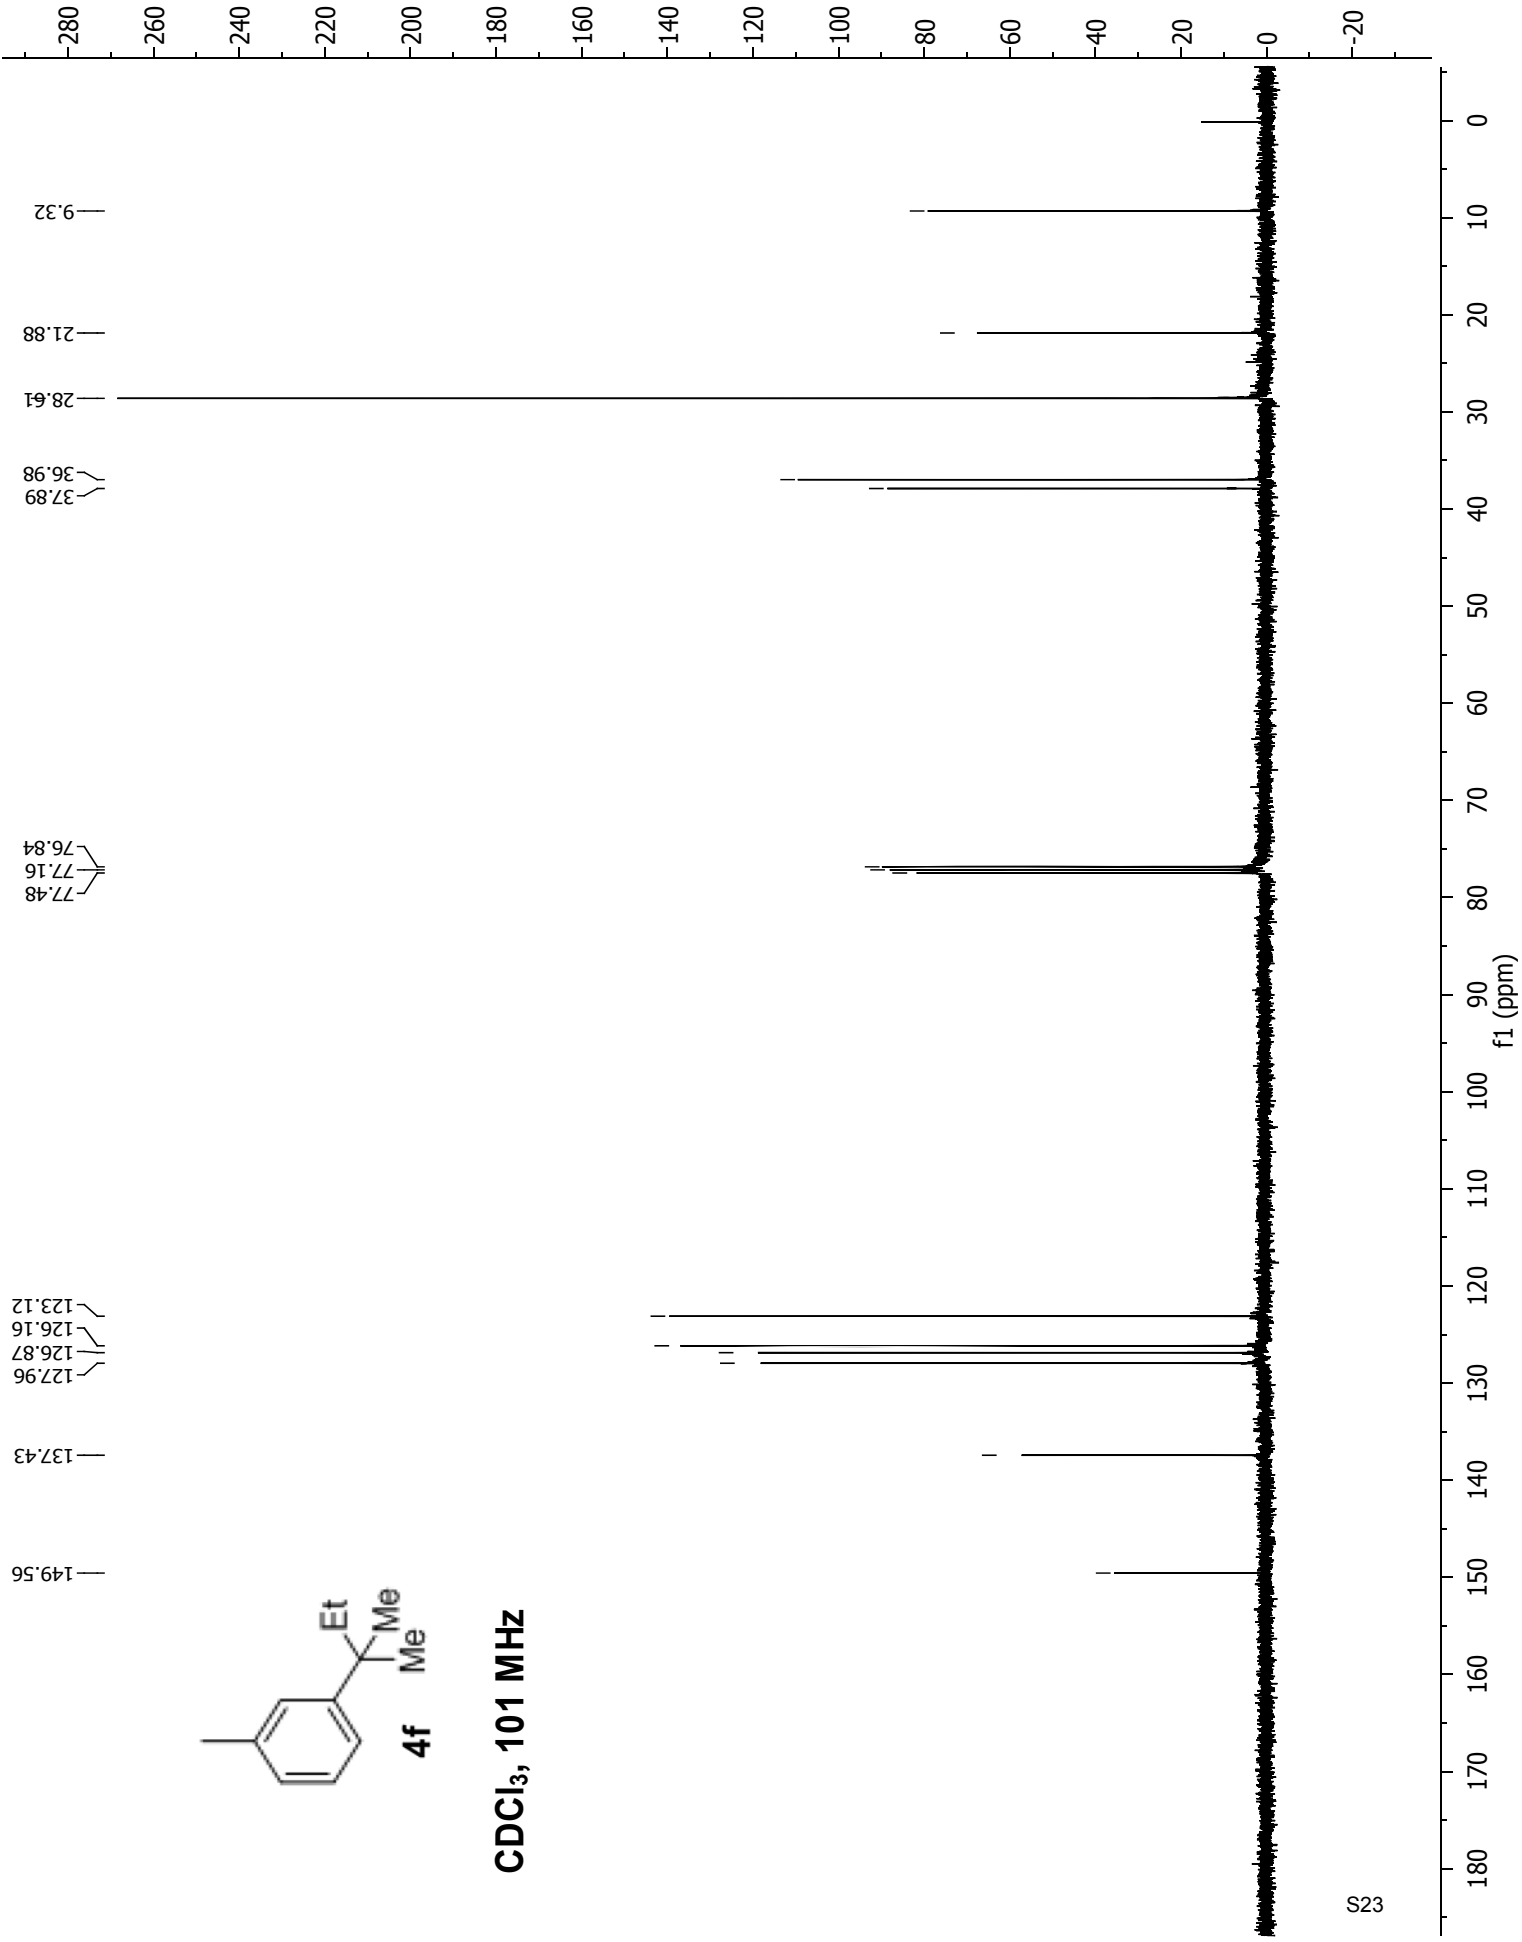

OHCA1163A  
PROTONRO CDCl3 7.674 top spin 5: Orion - data carlie-1 1

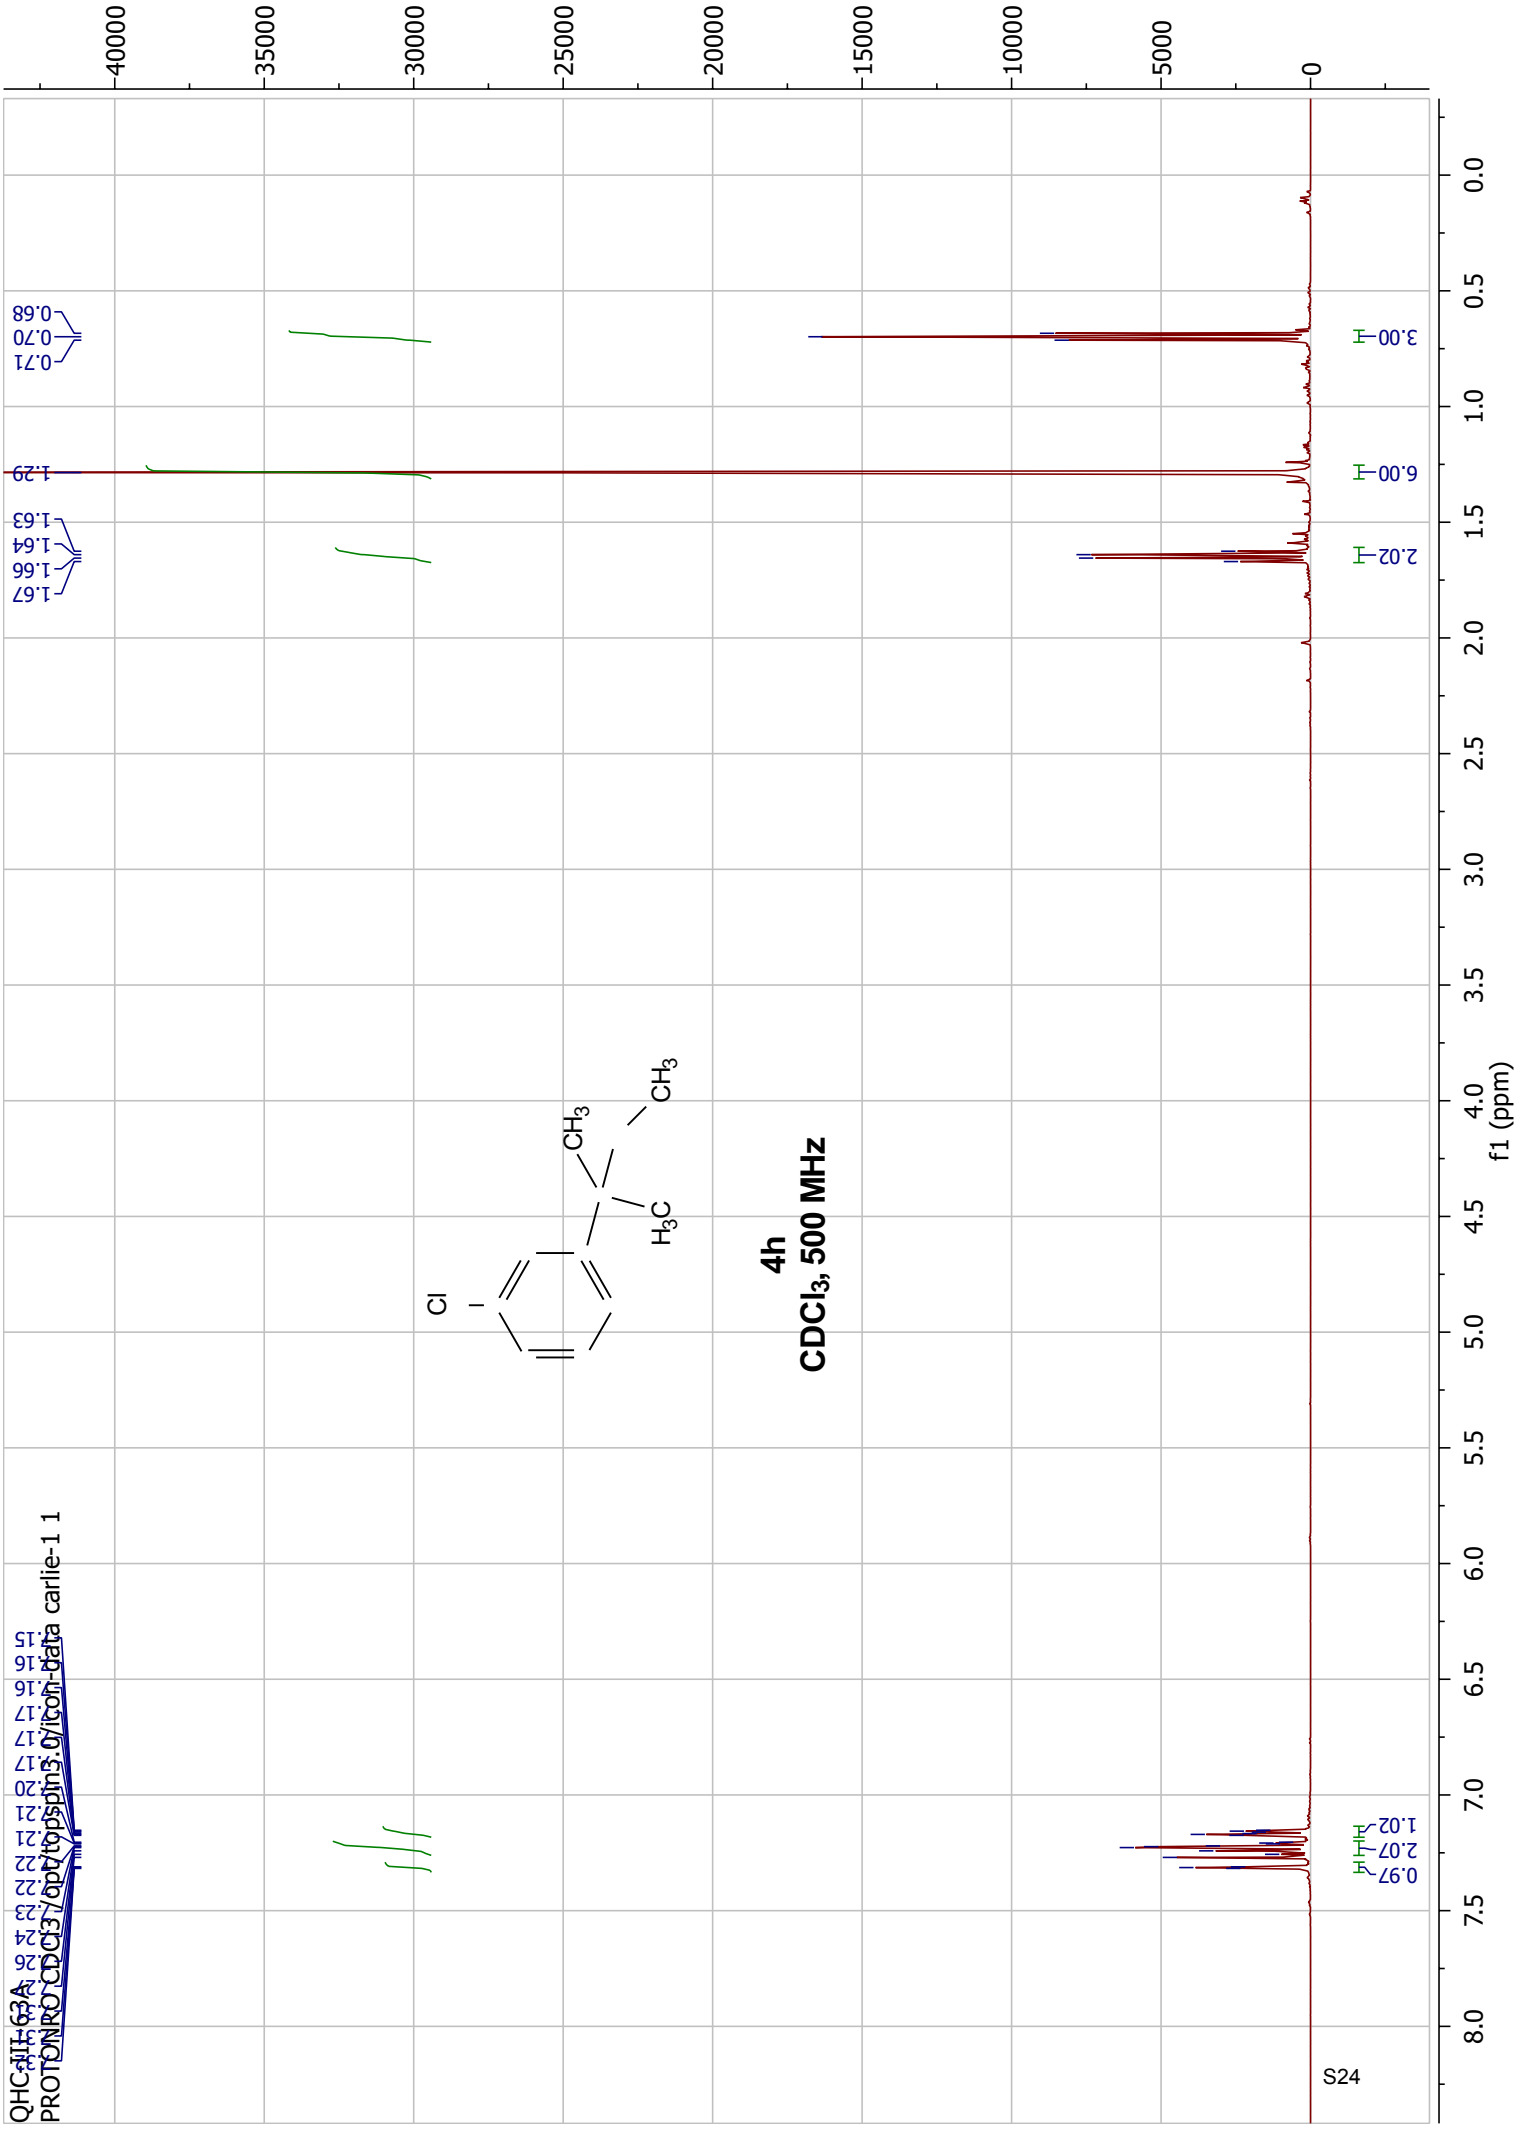



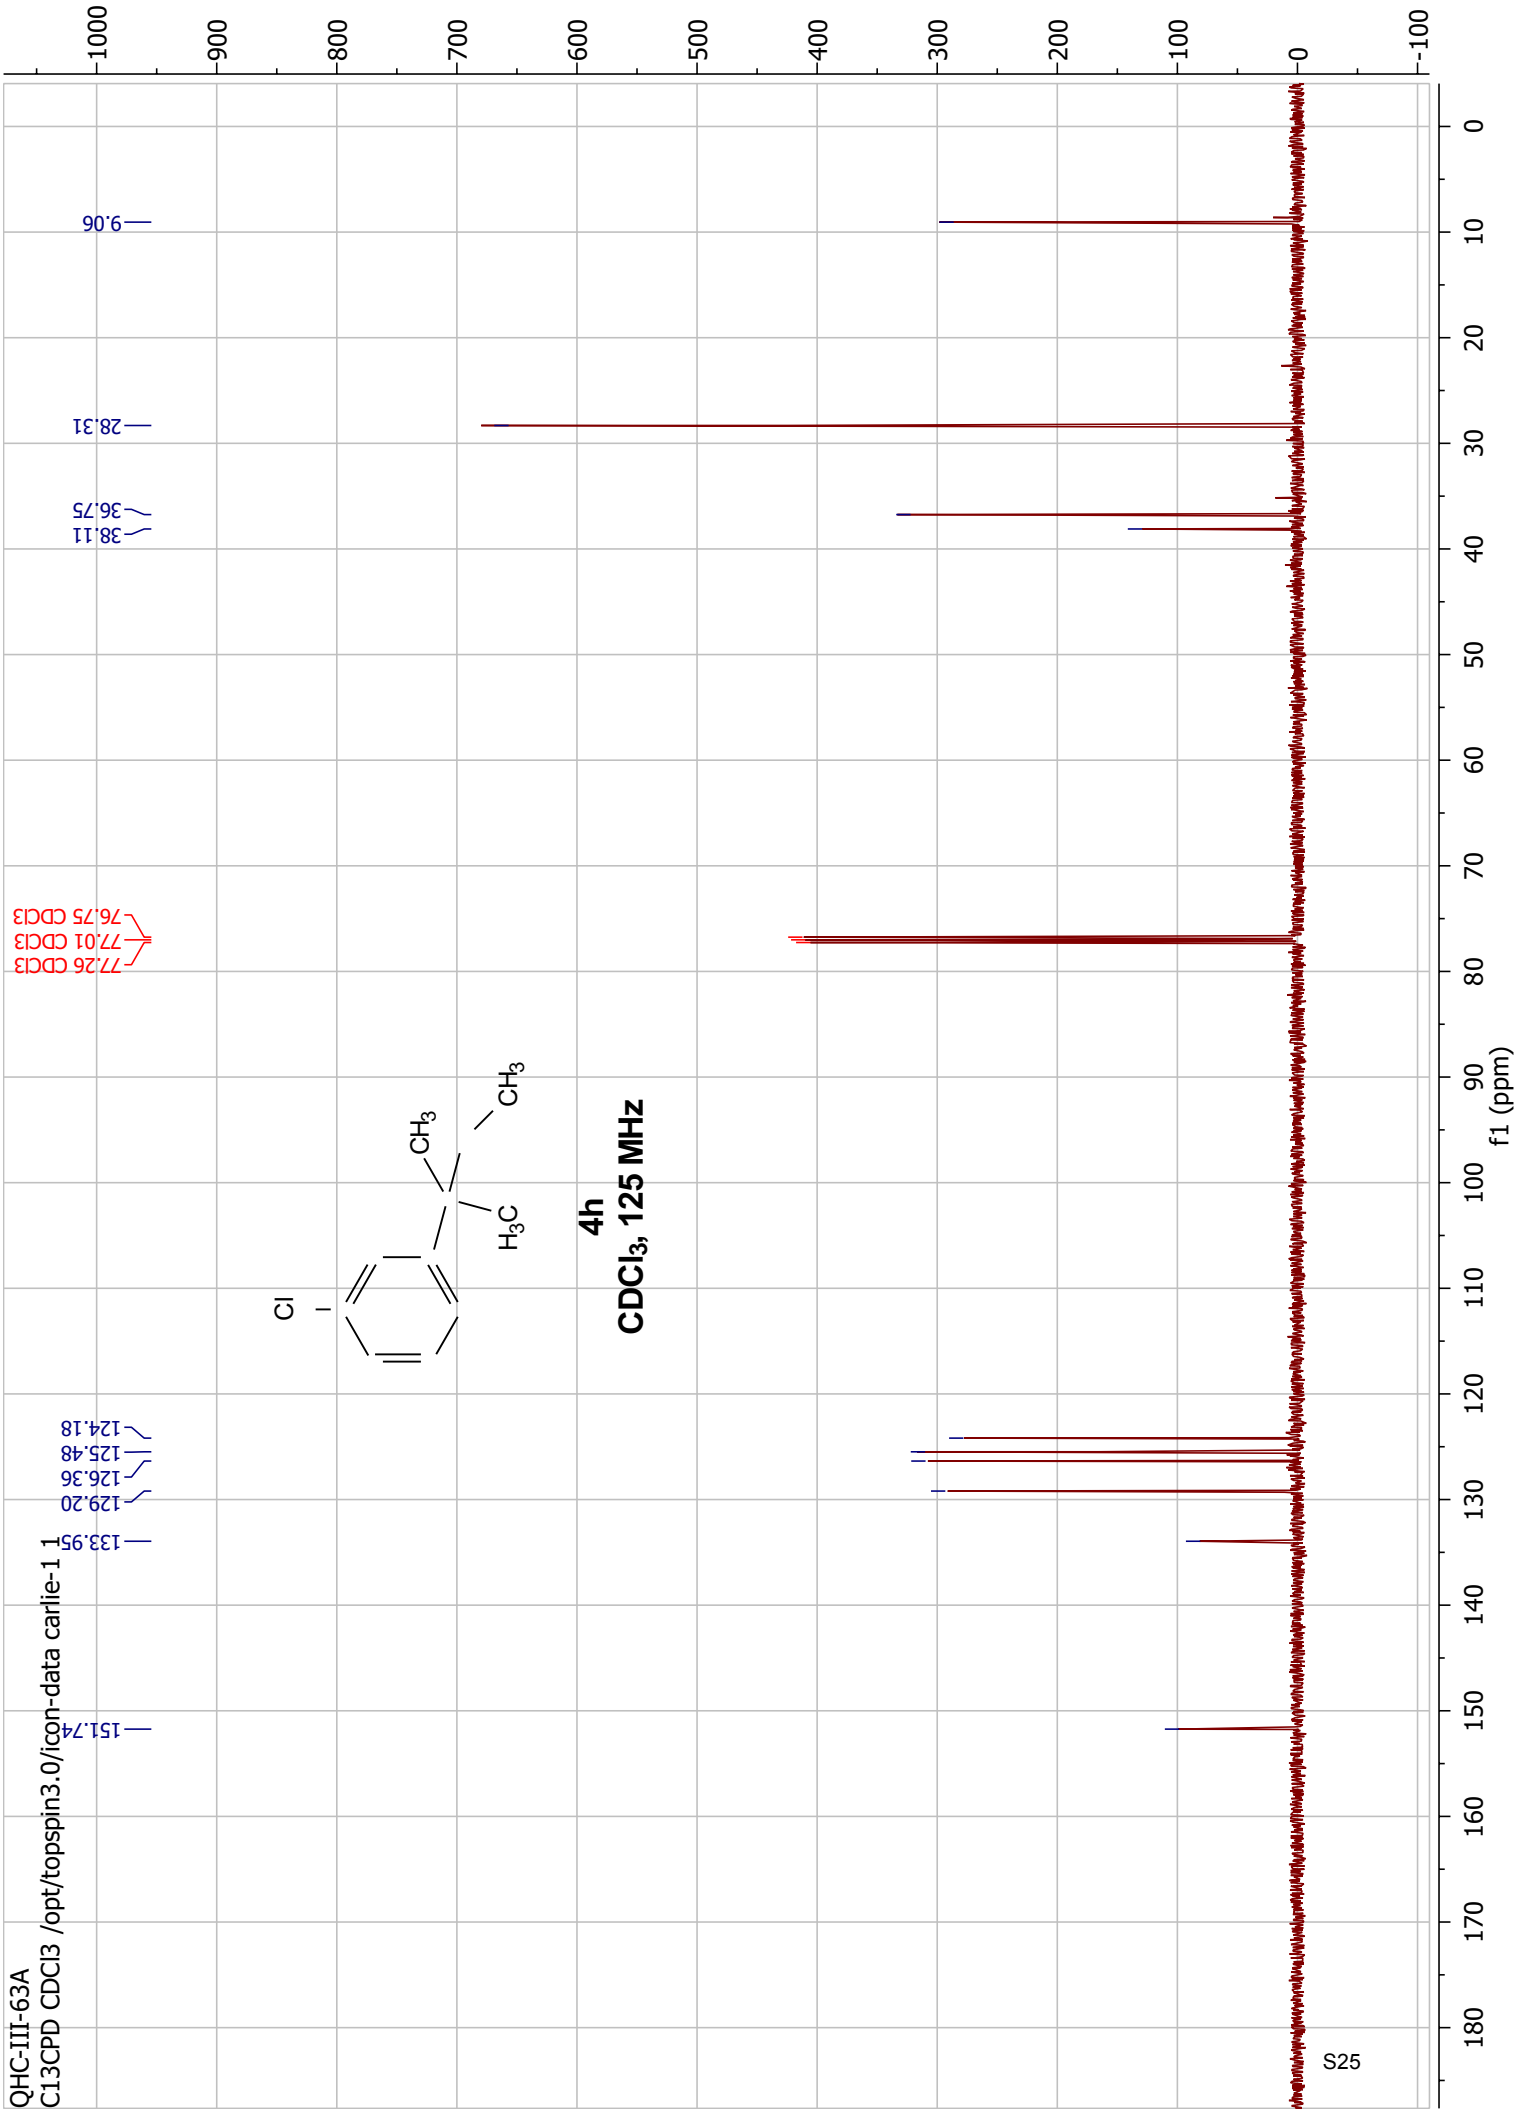

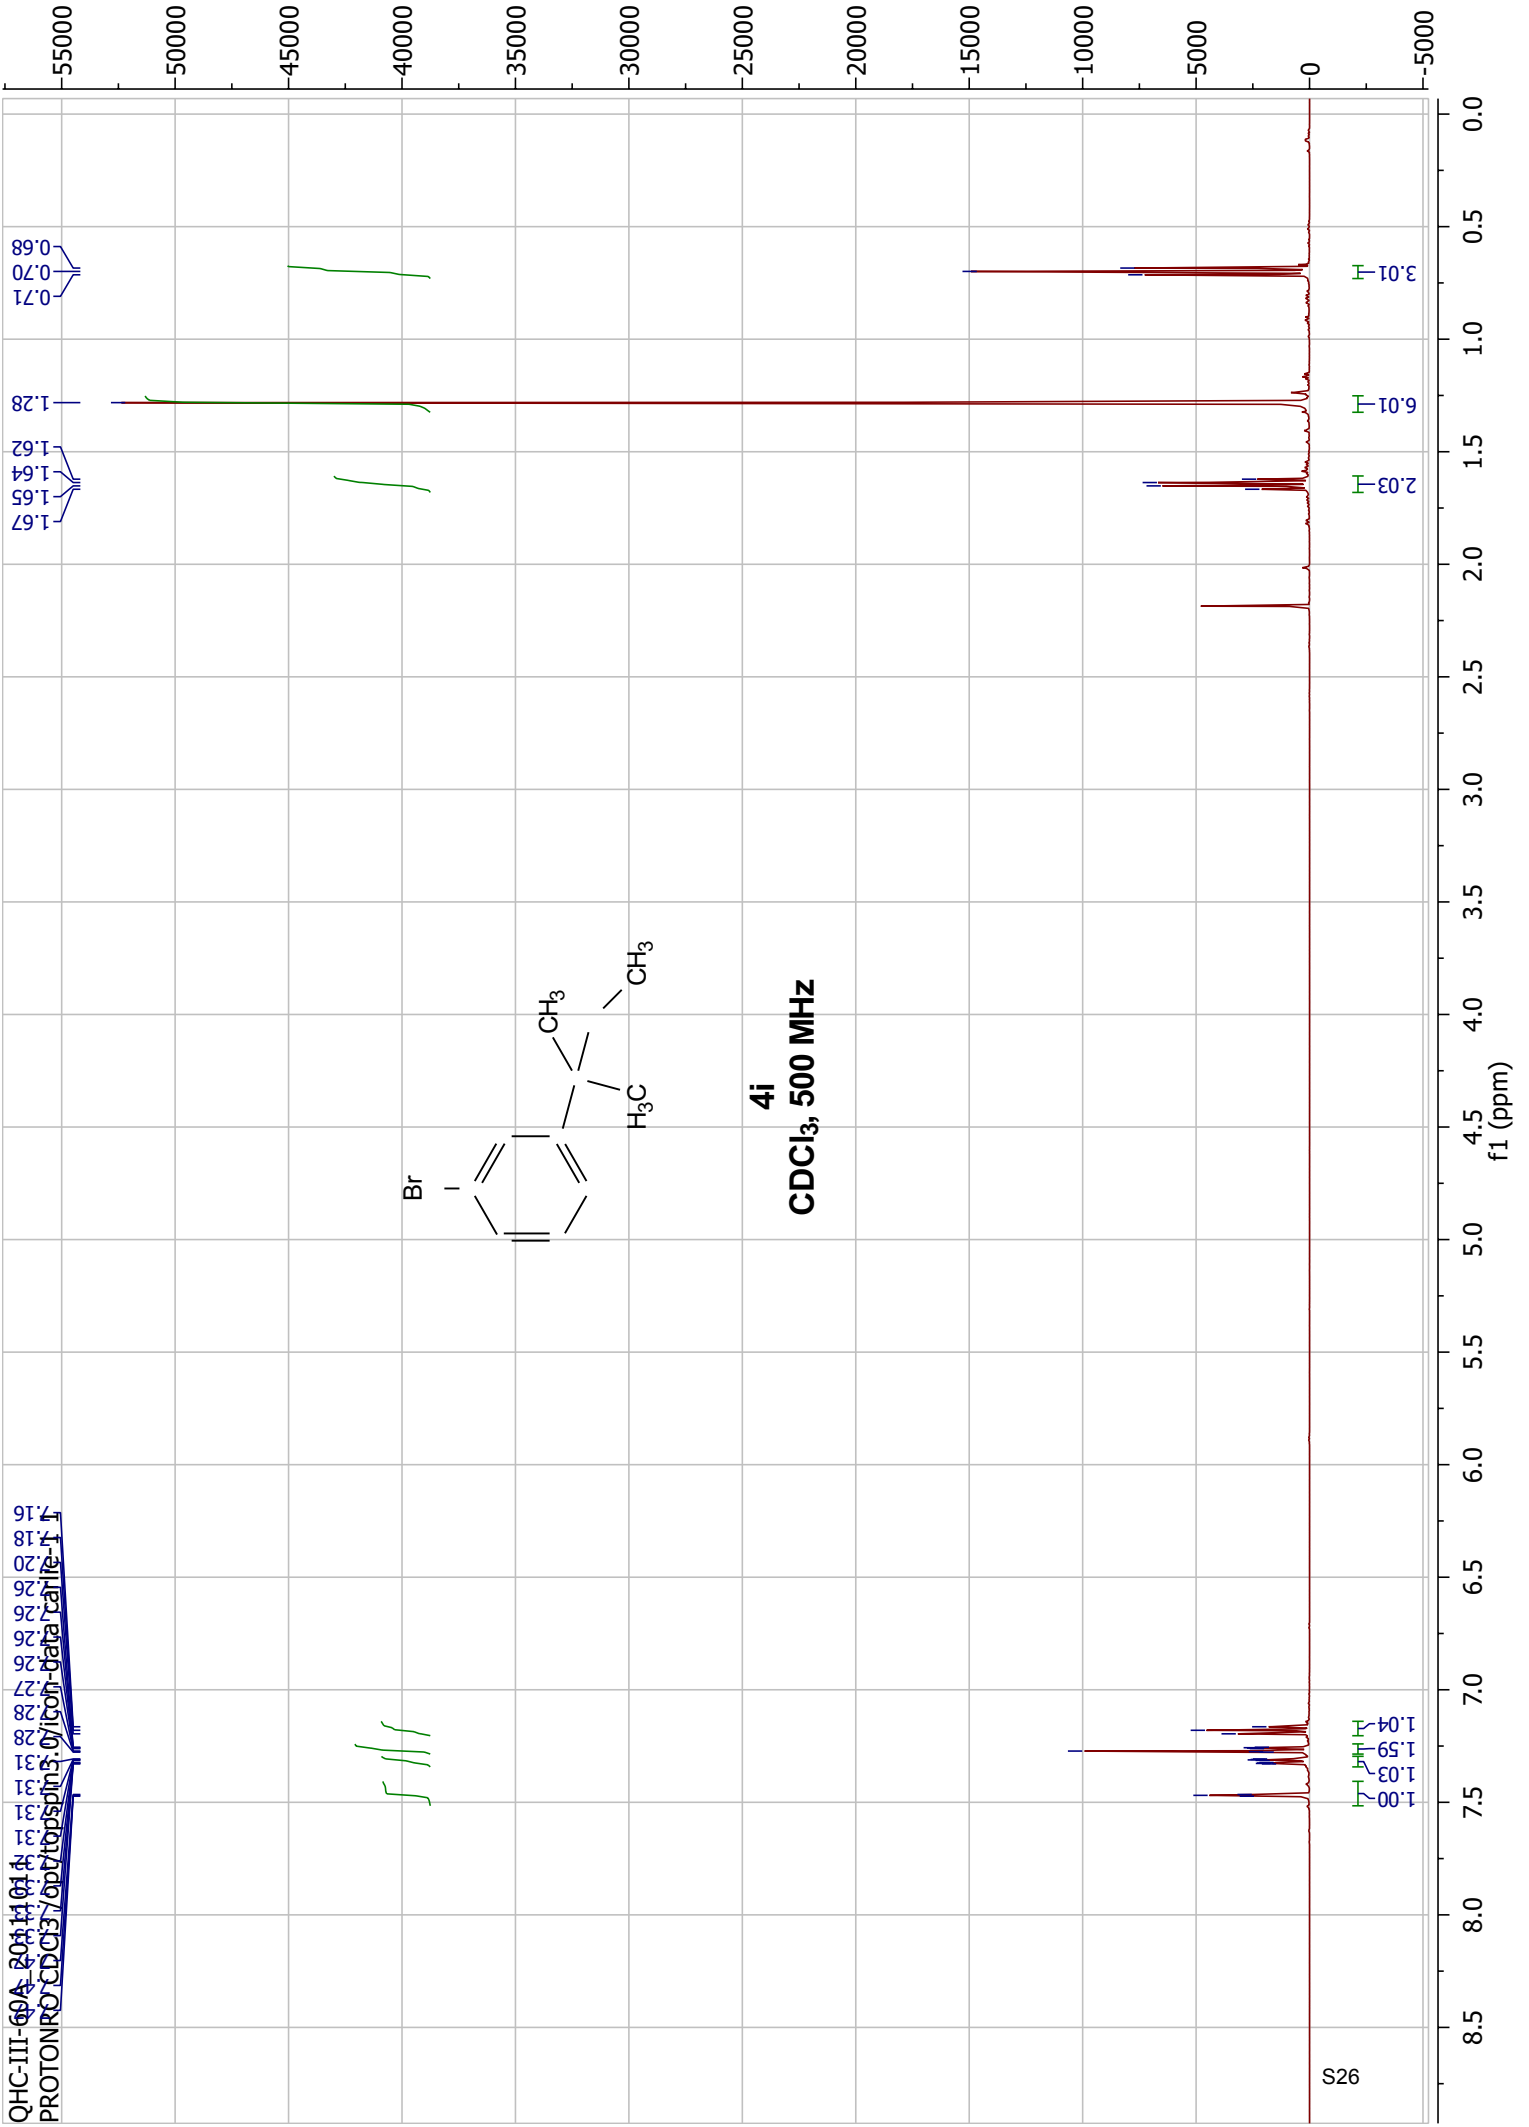

QHC-III-69A\_20111014  
 PROTONRO\_CDCl3\_70pt100spin5\_01con\_data\_calre-1\_1

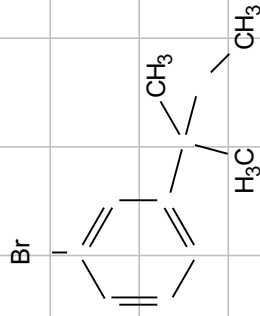

4i  
CDCl<sub>3</sub>, 125 MHz

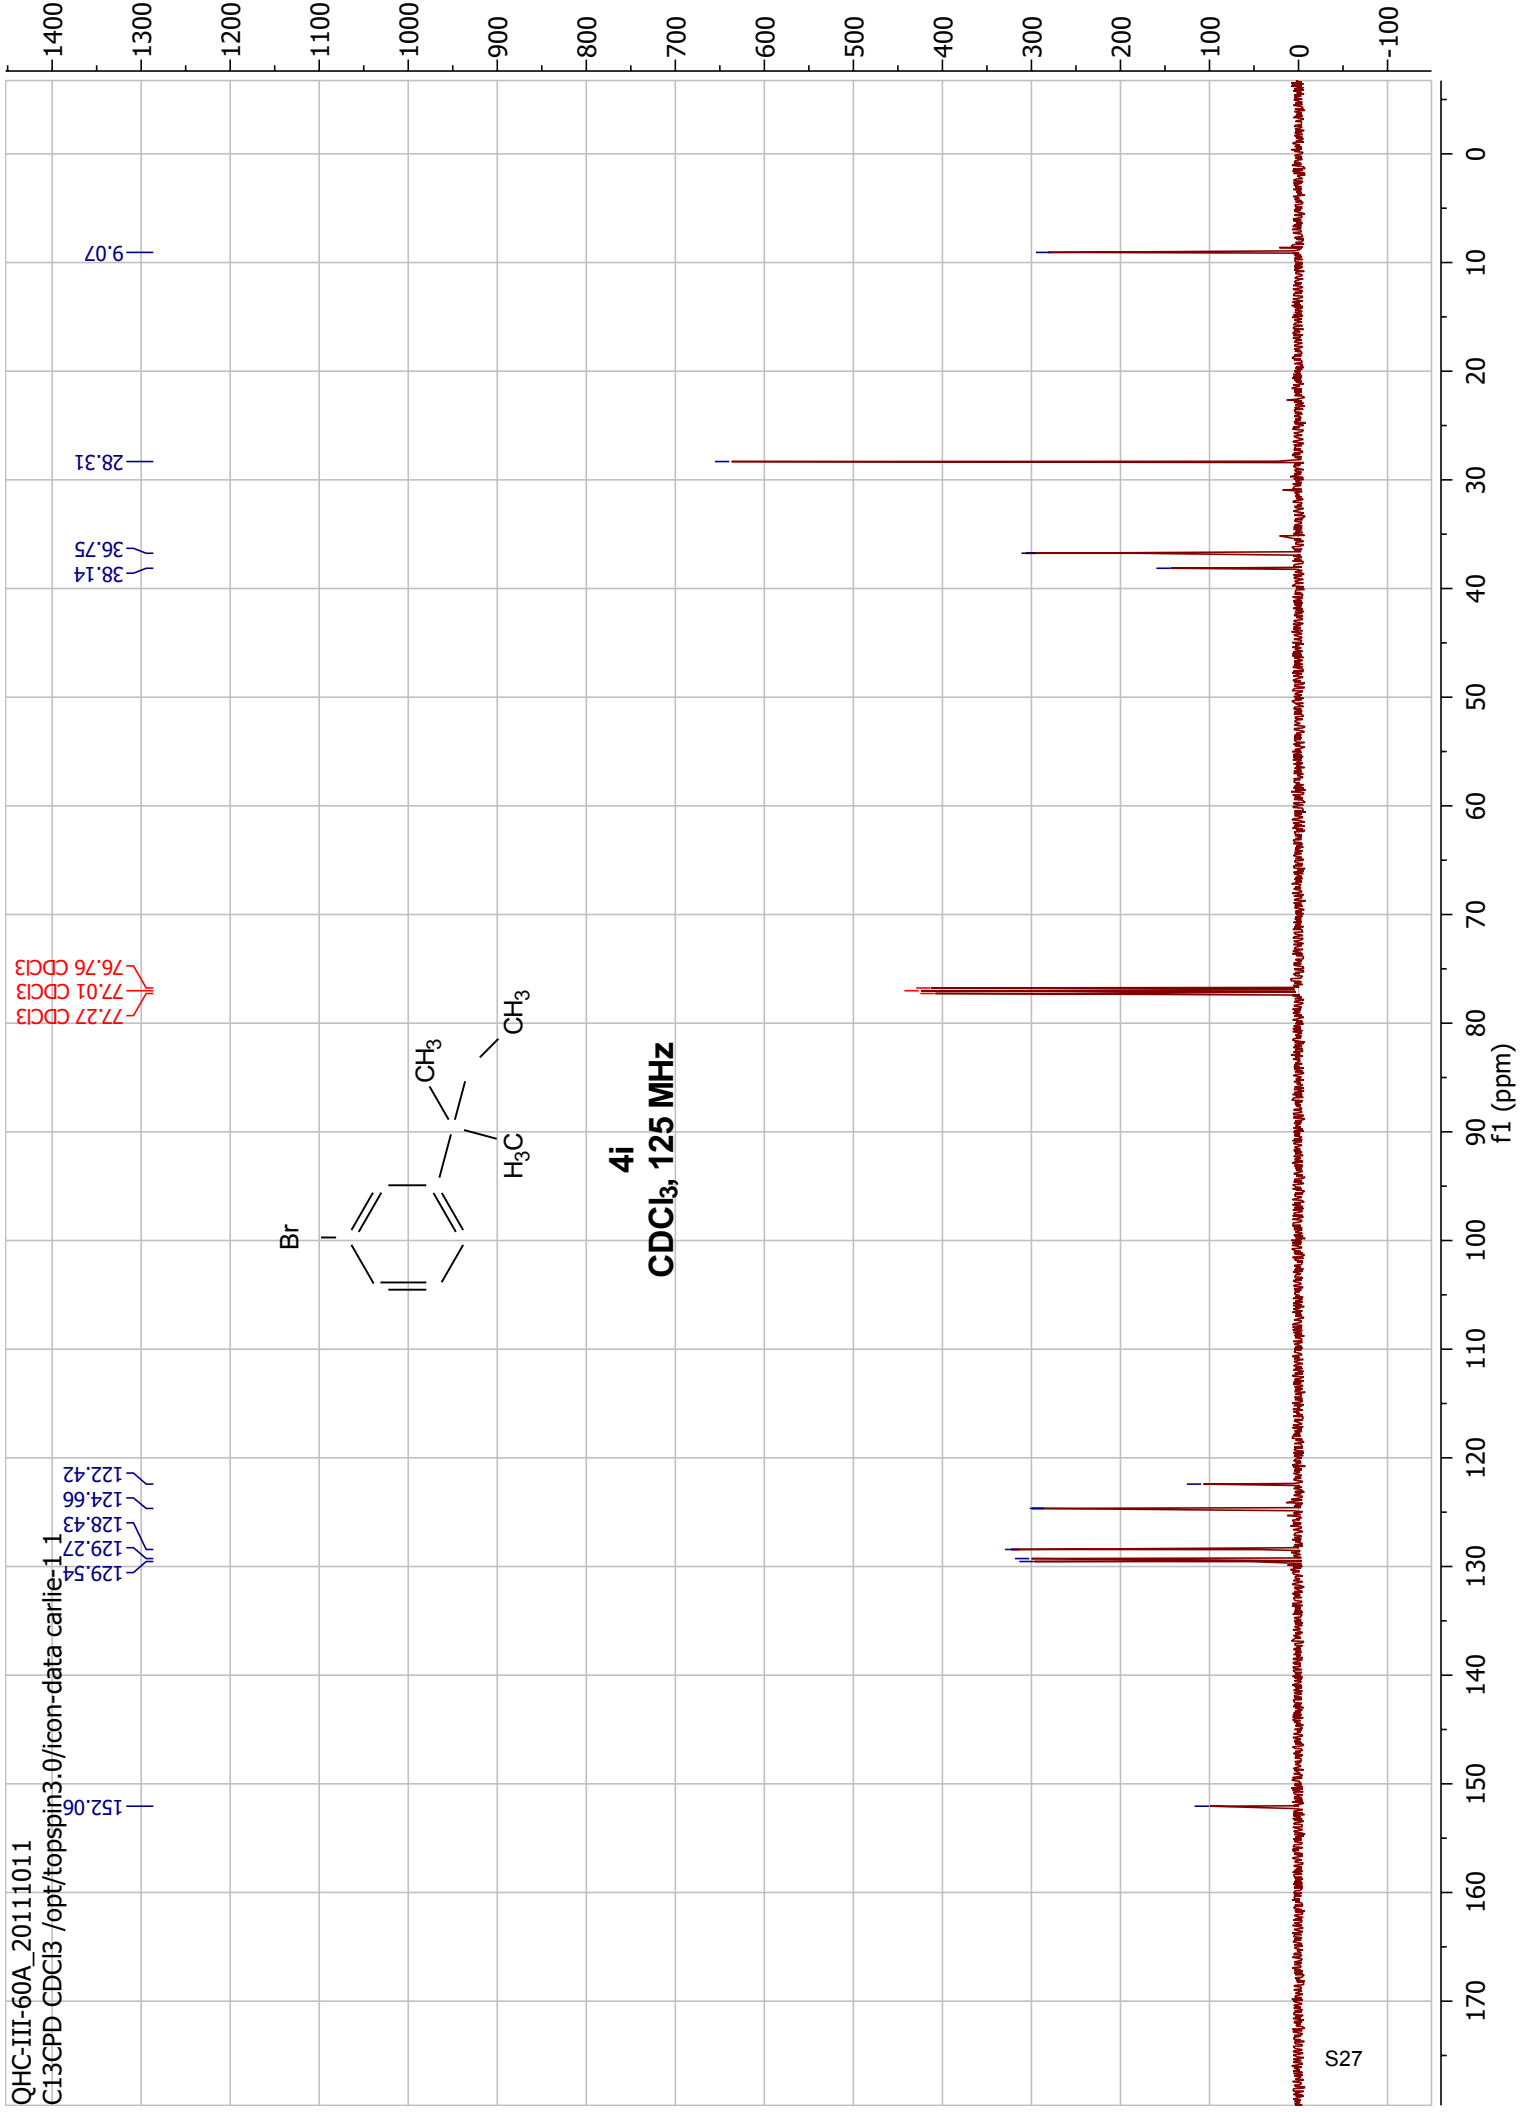

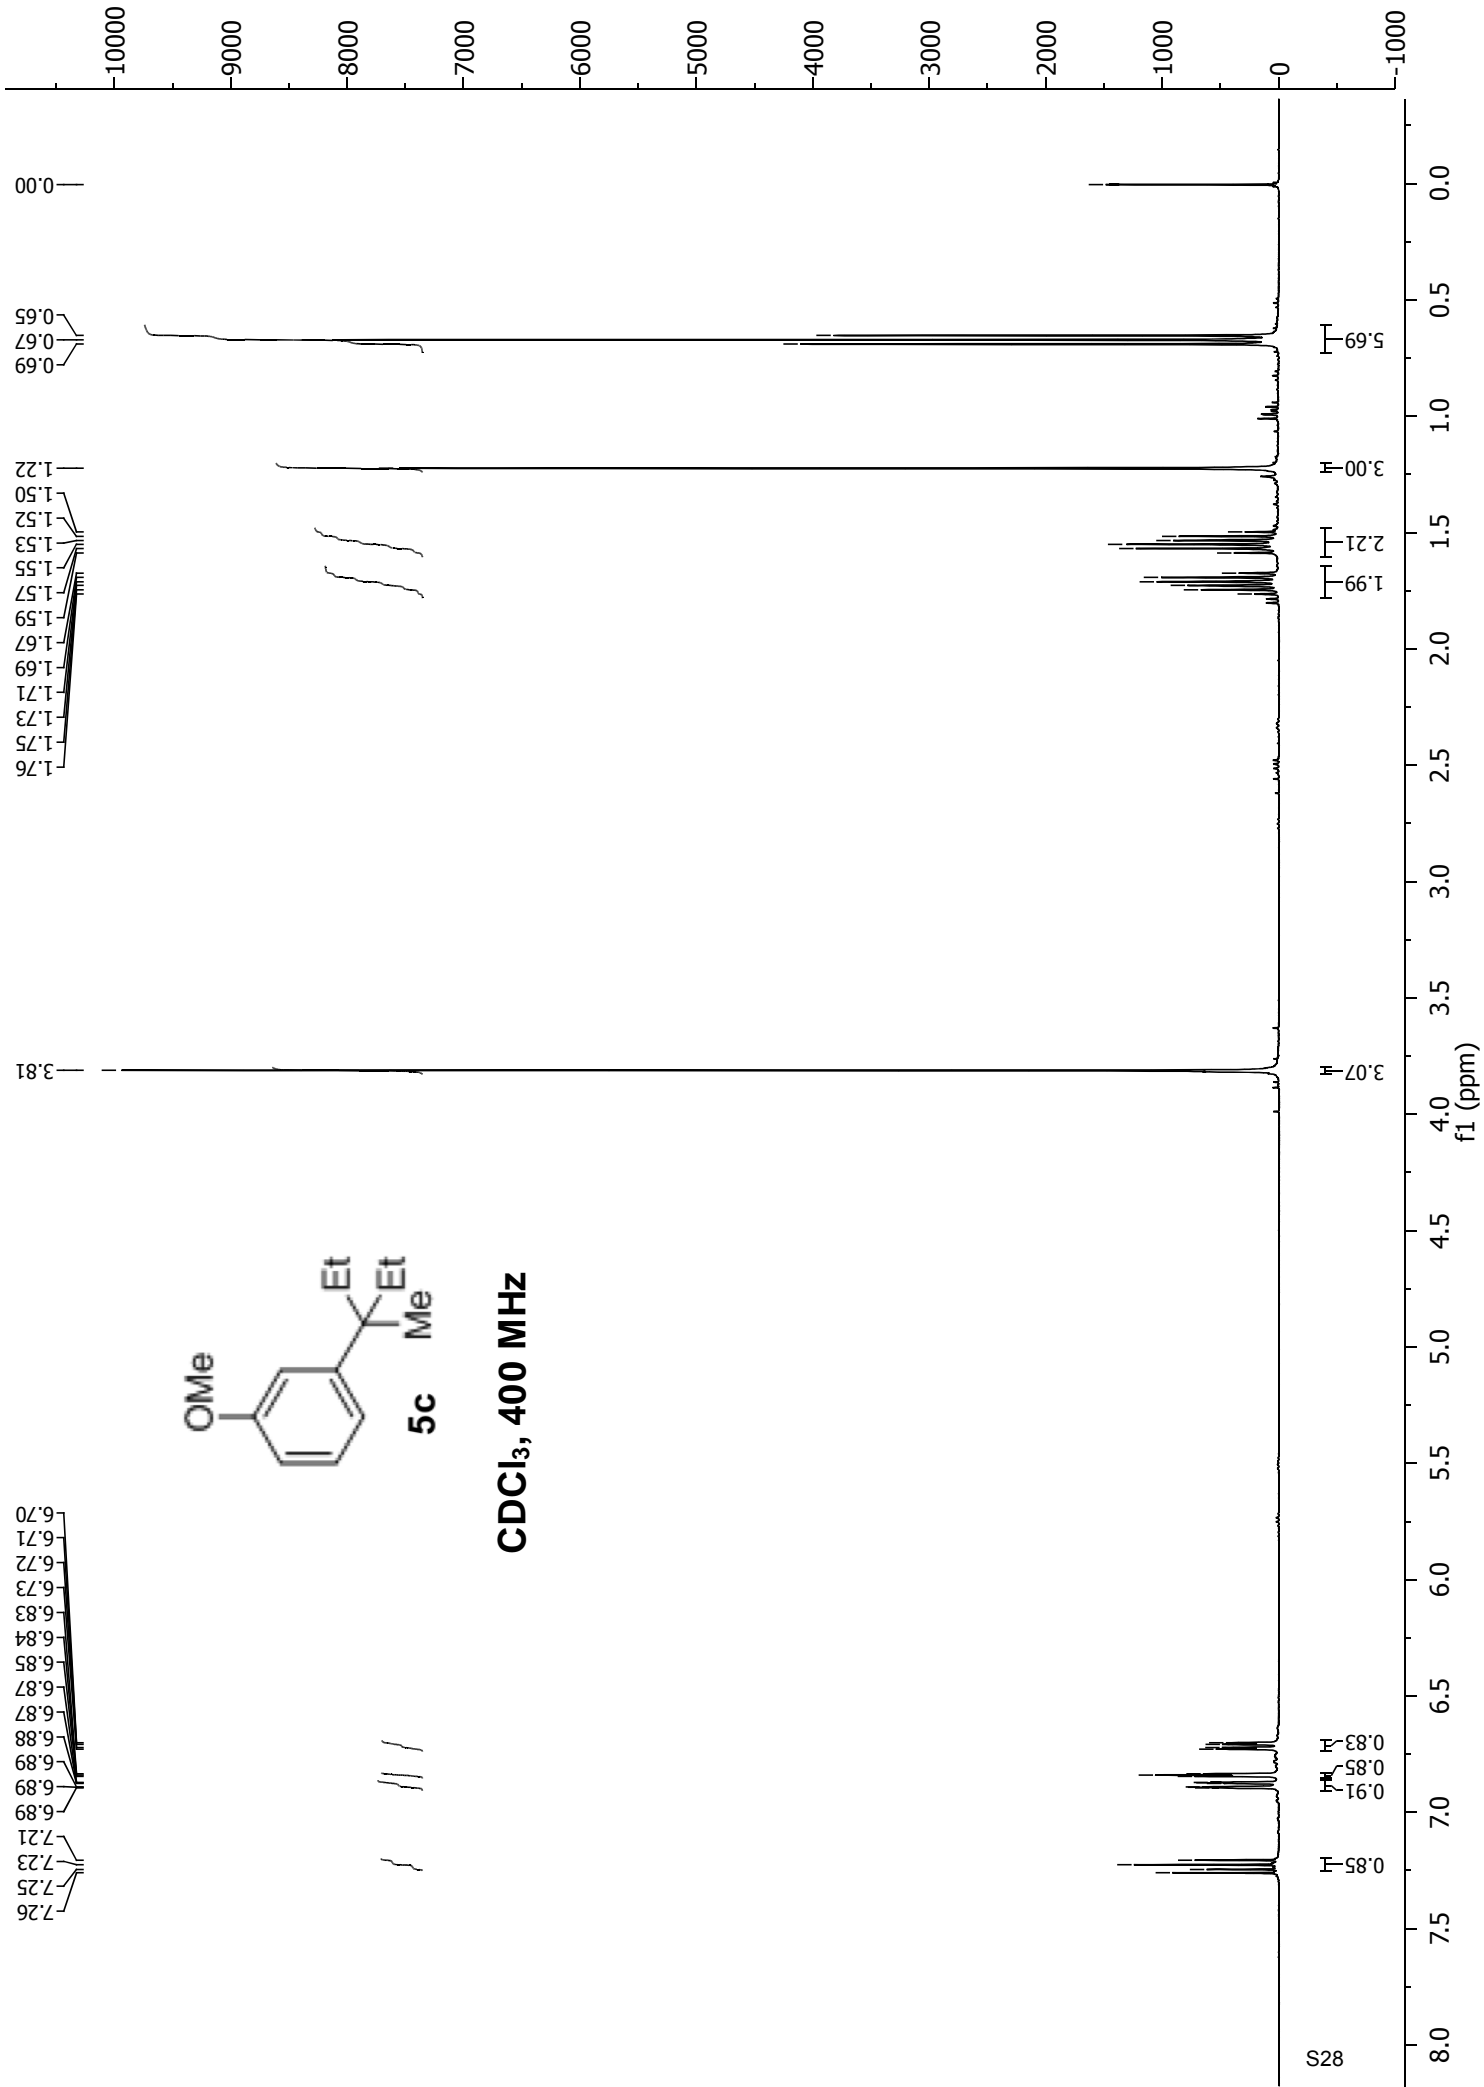

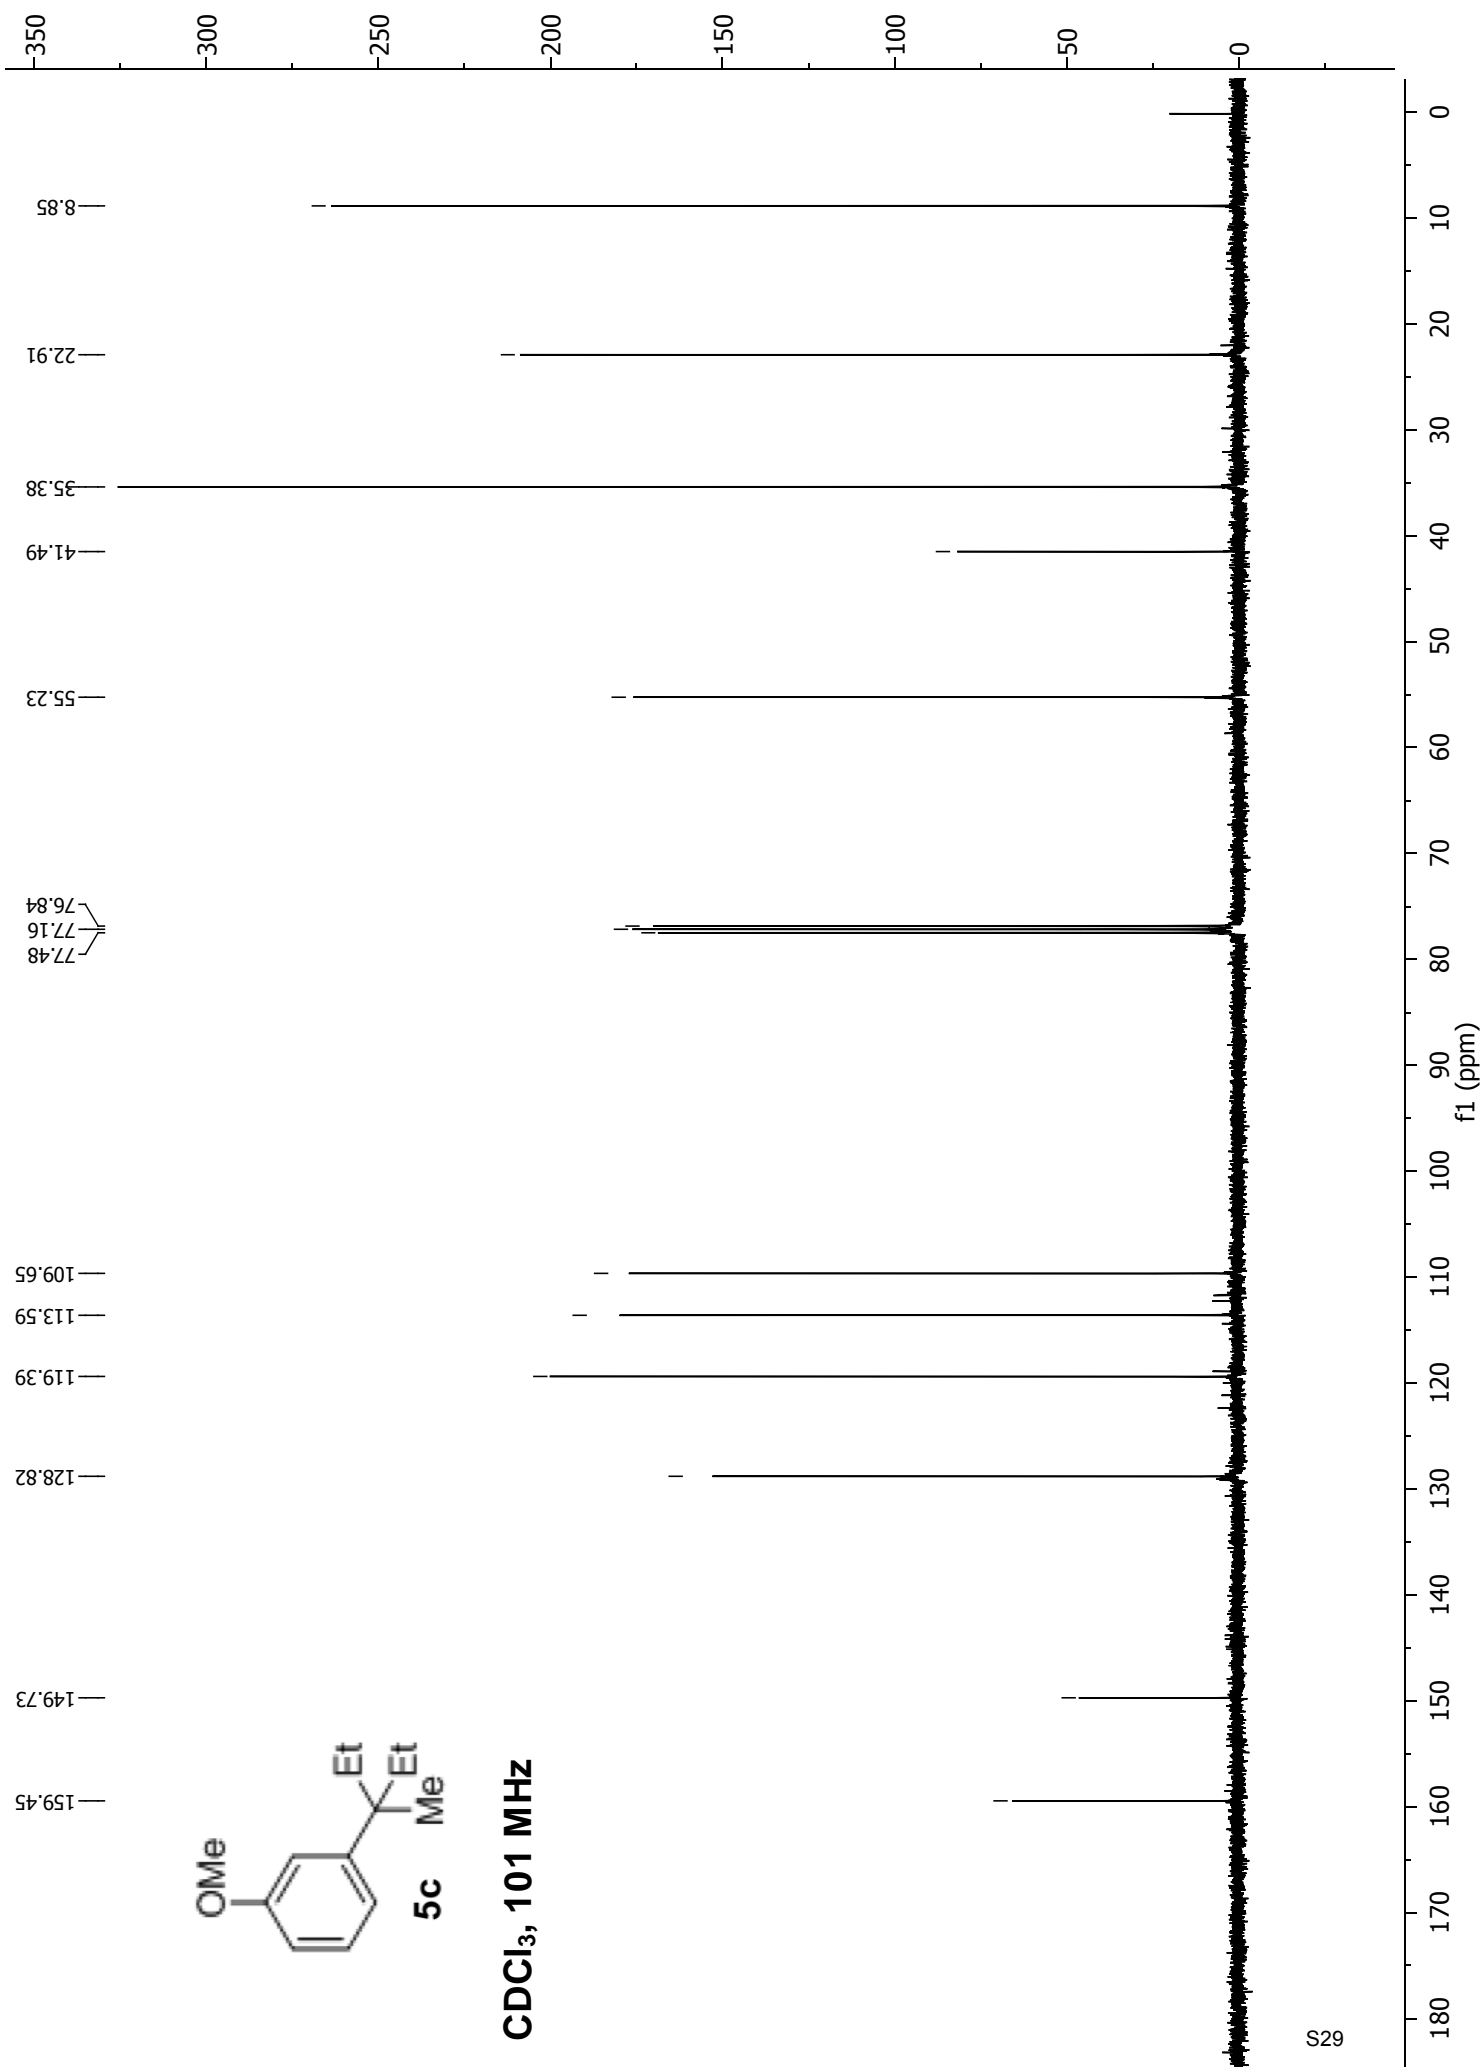

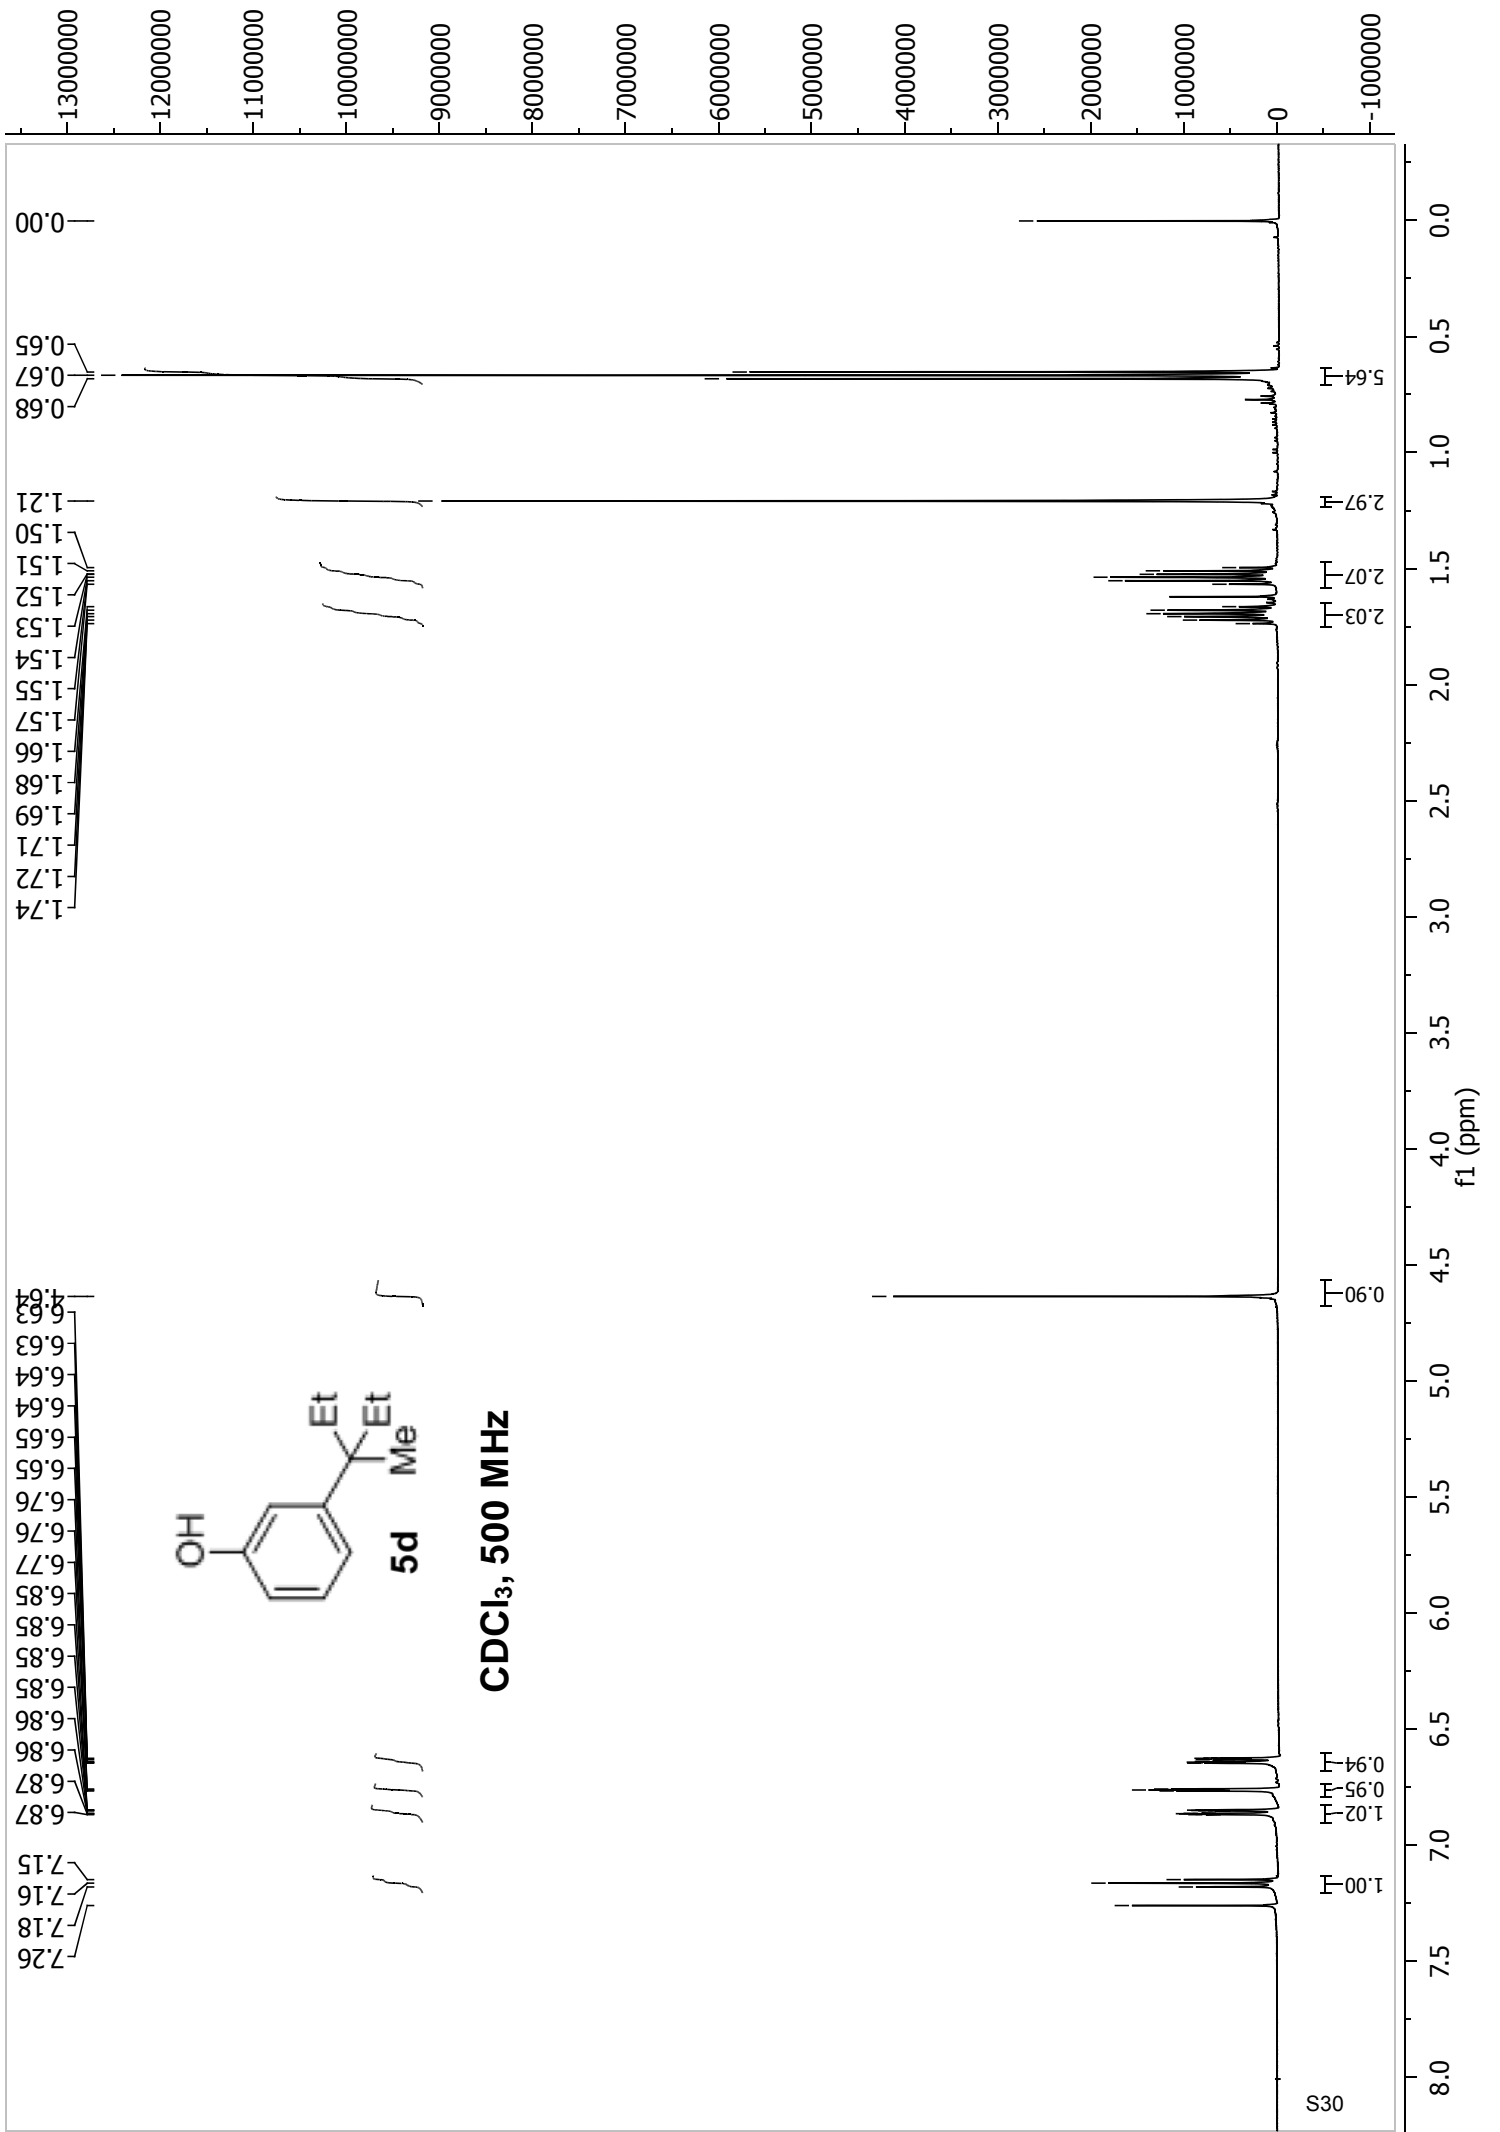

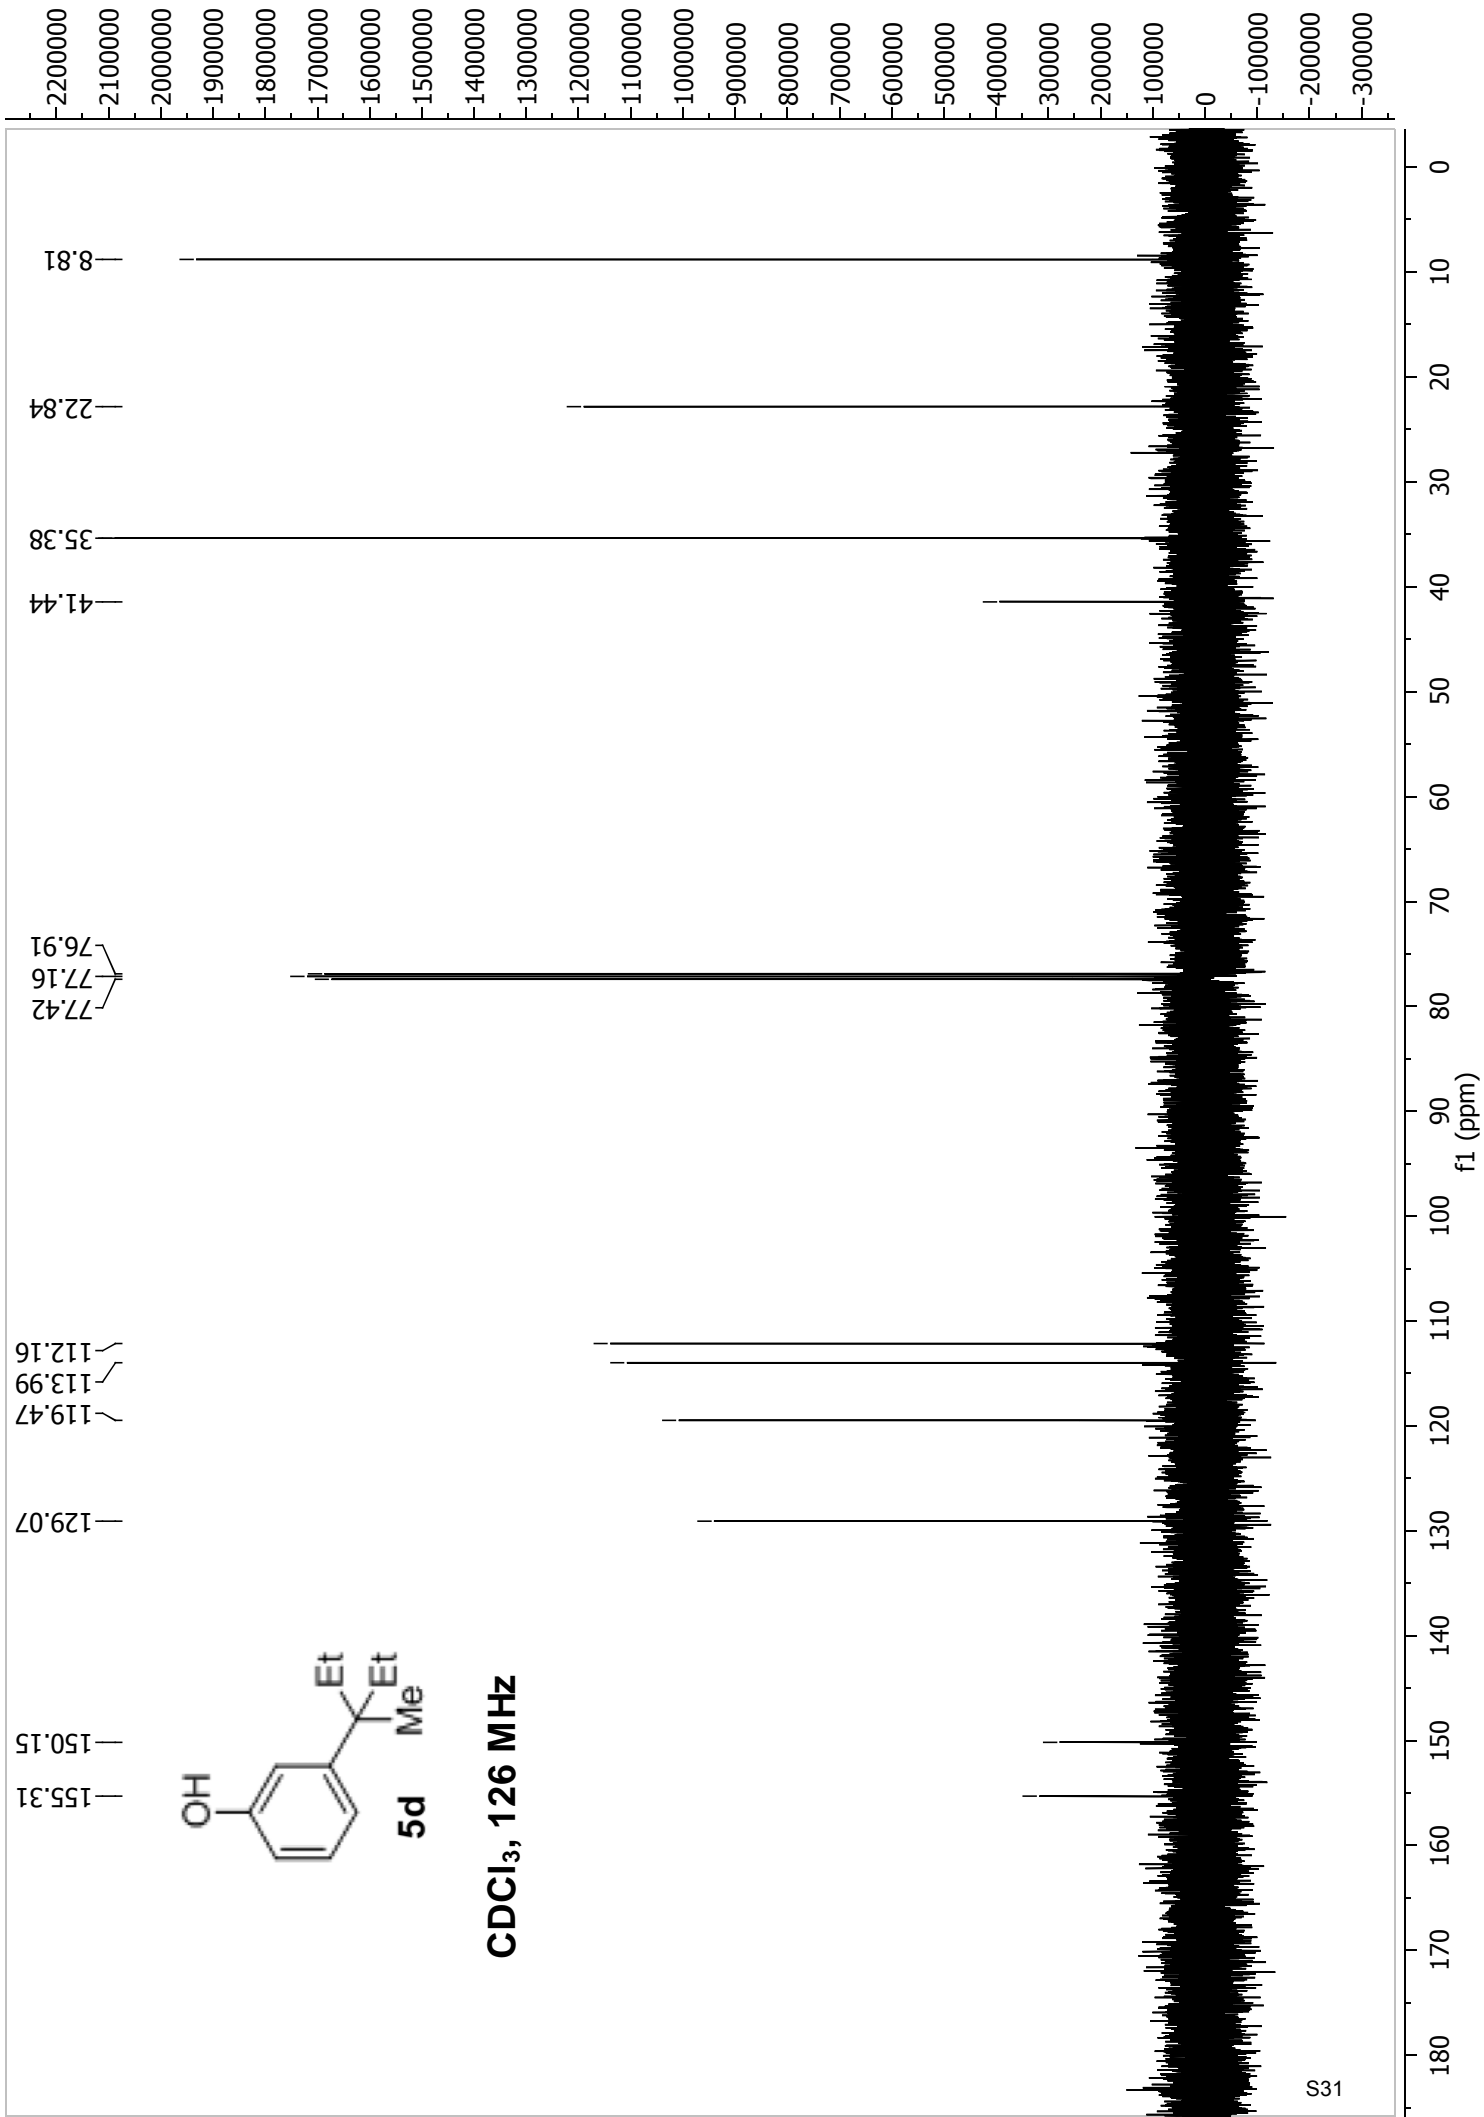

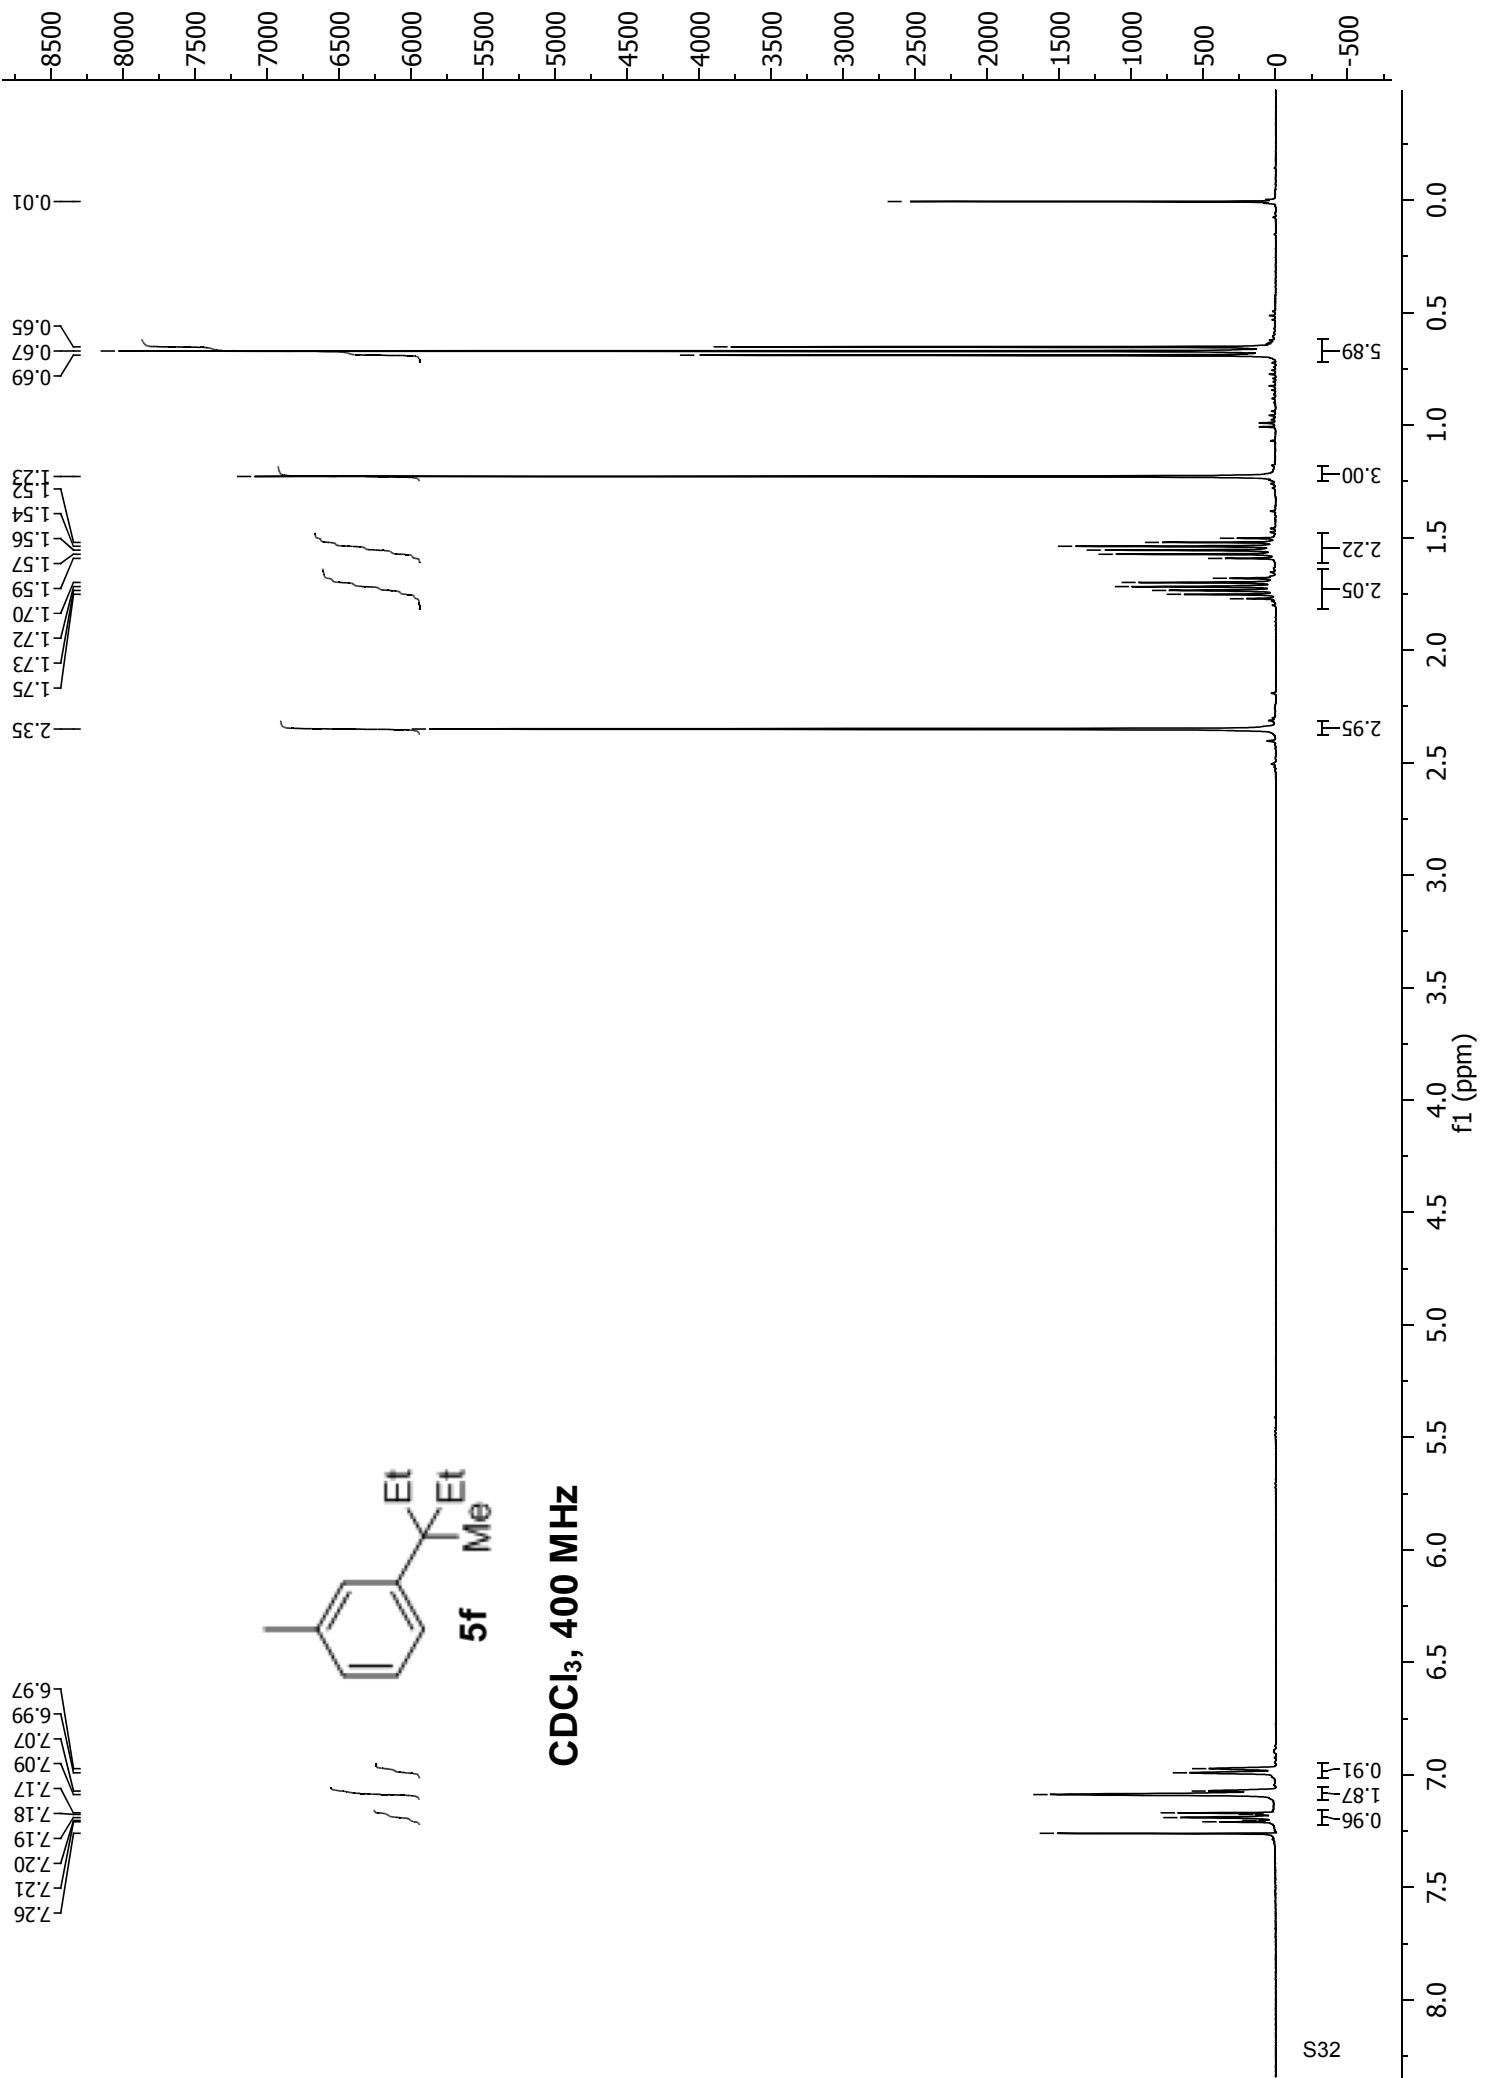



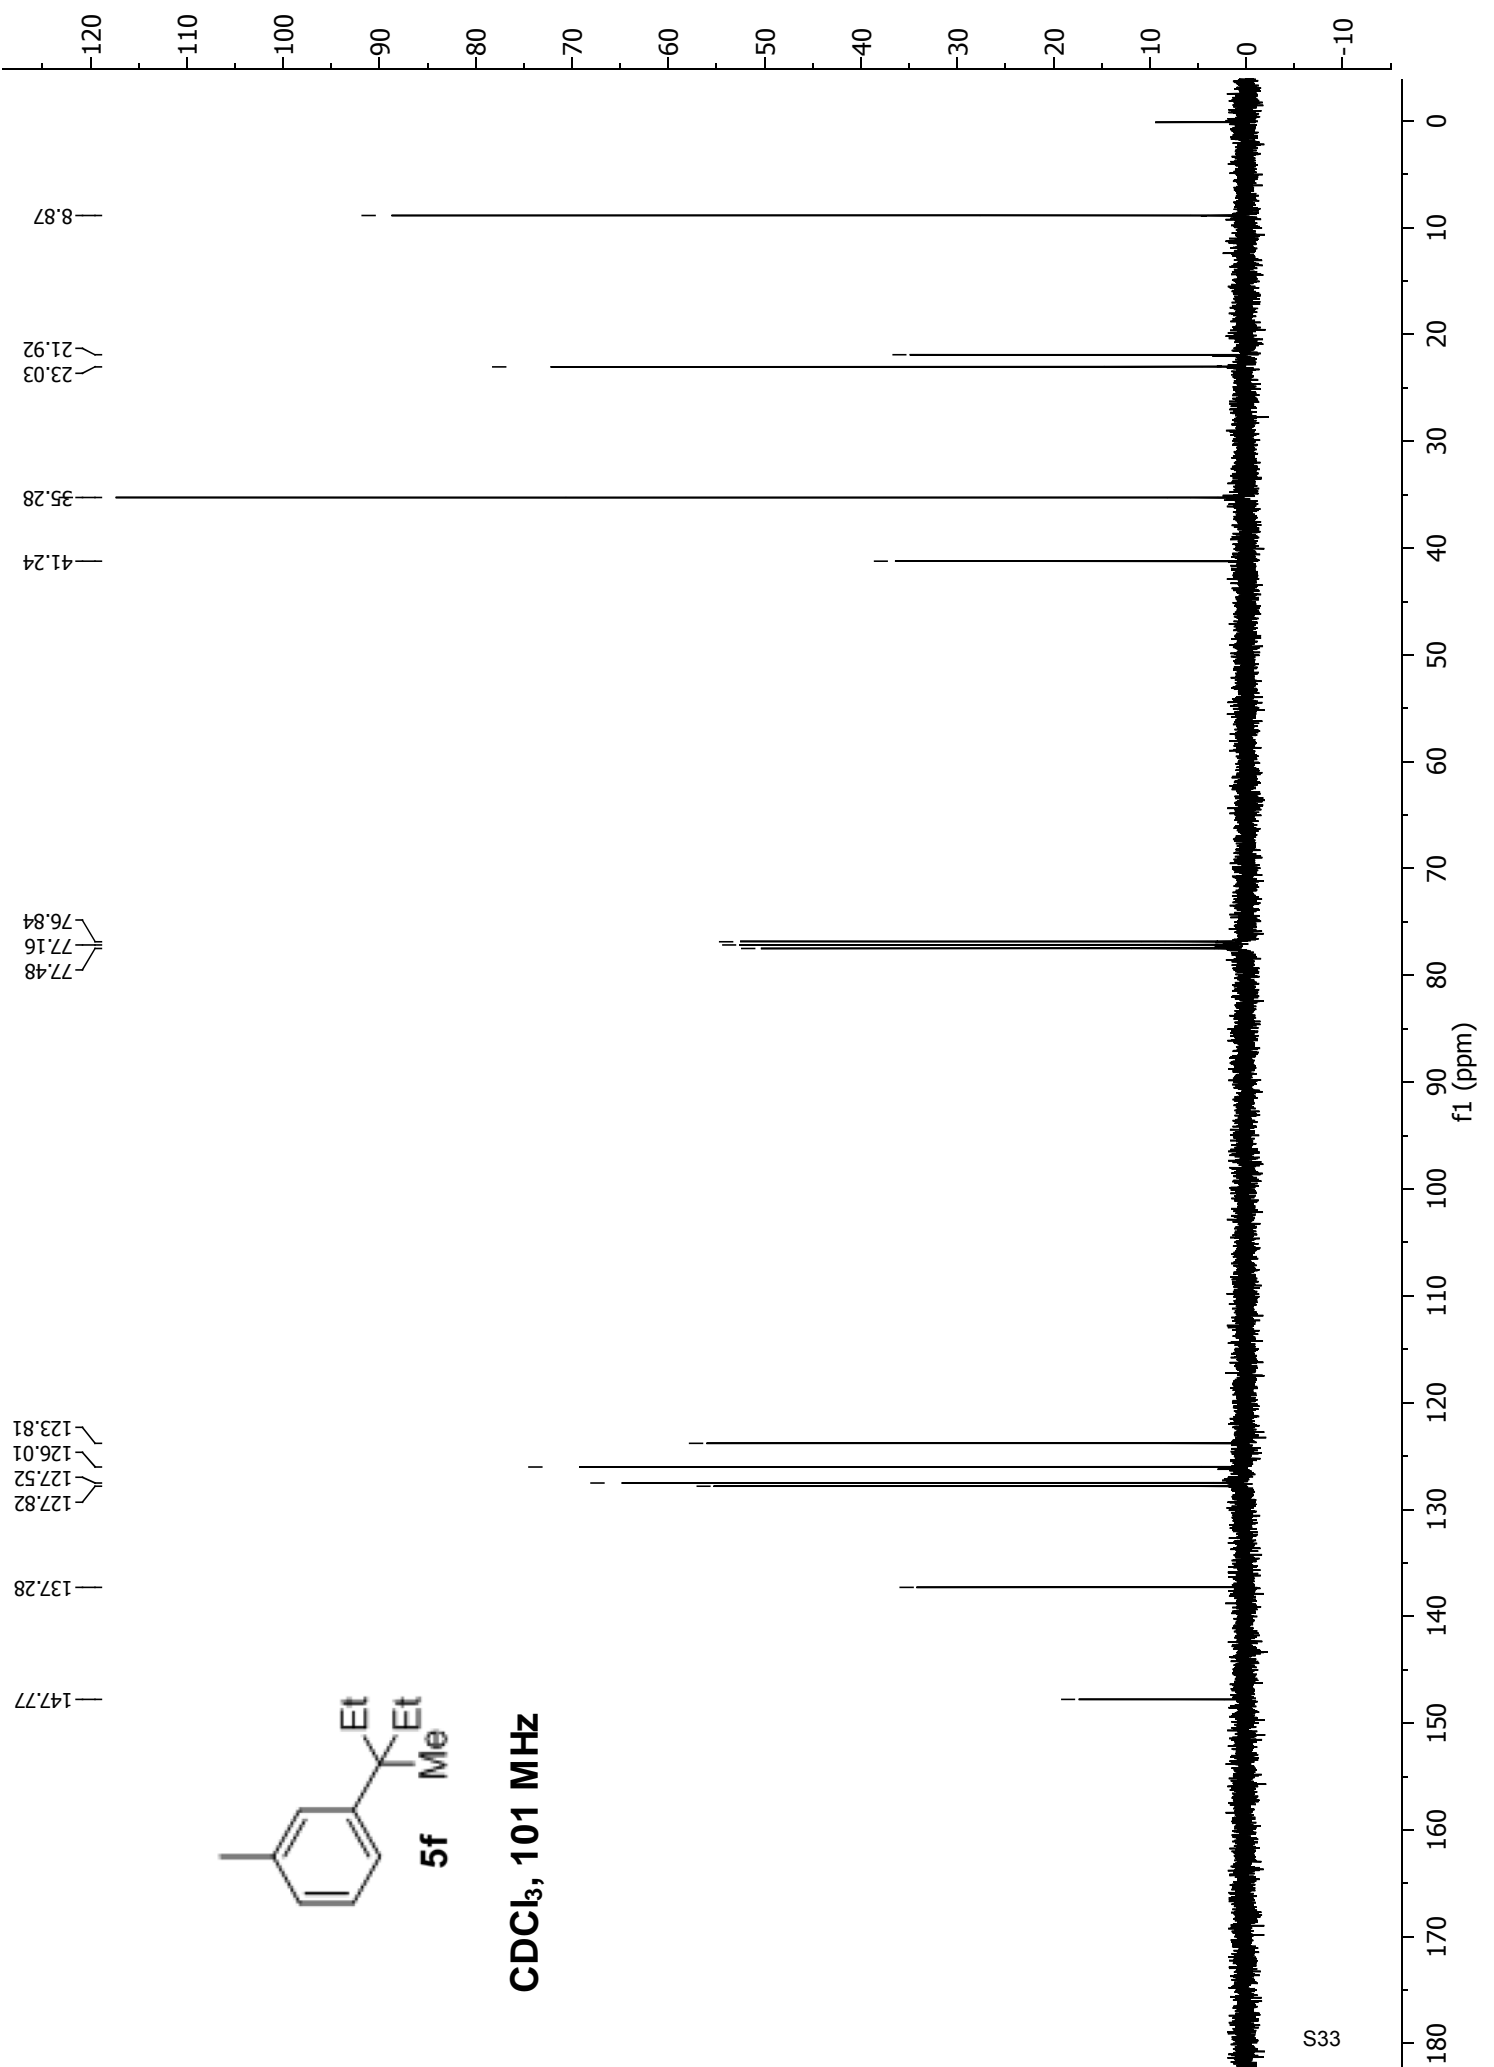

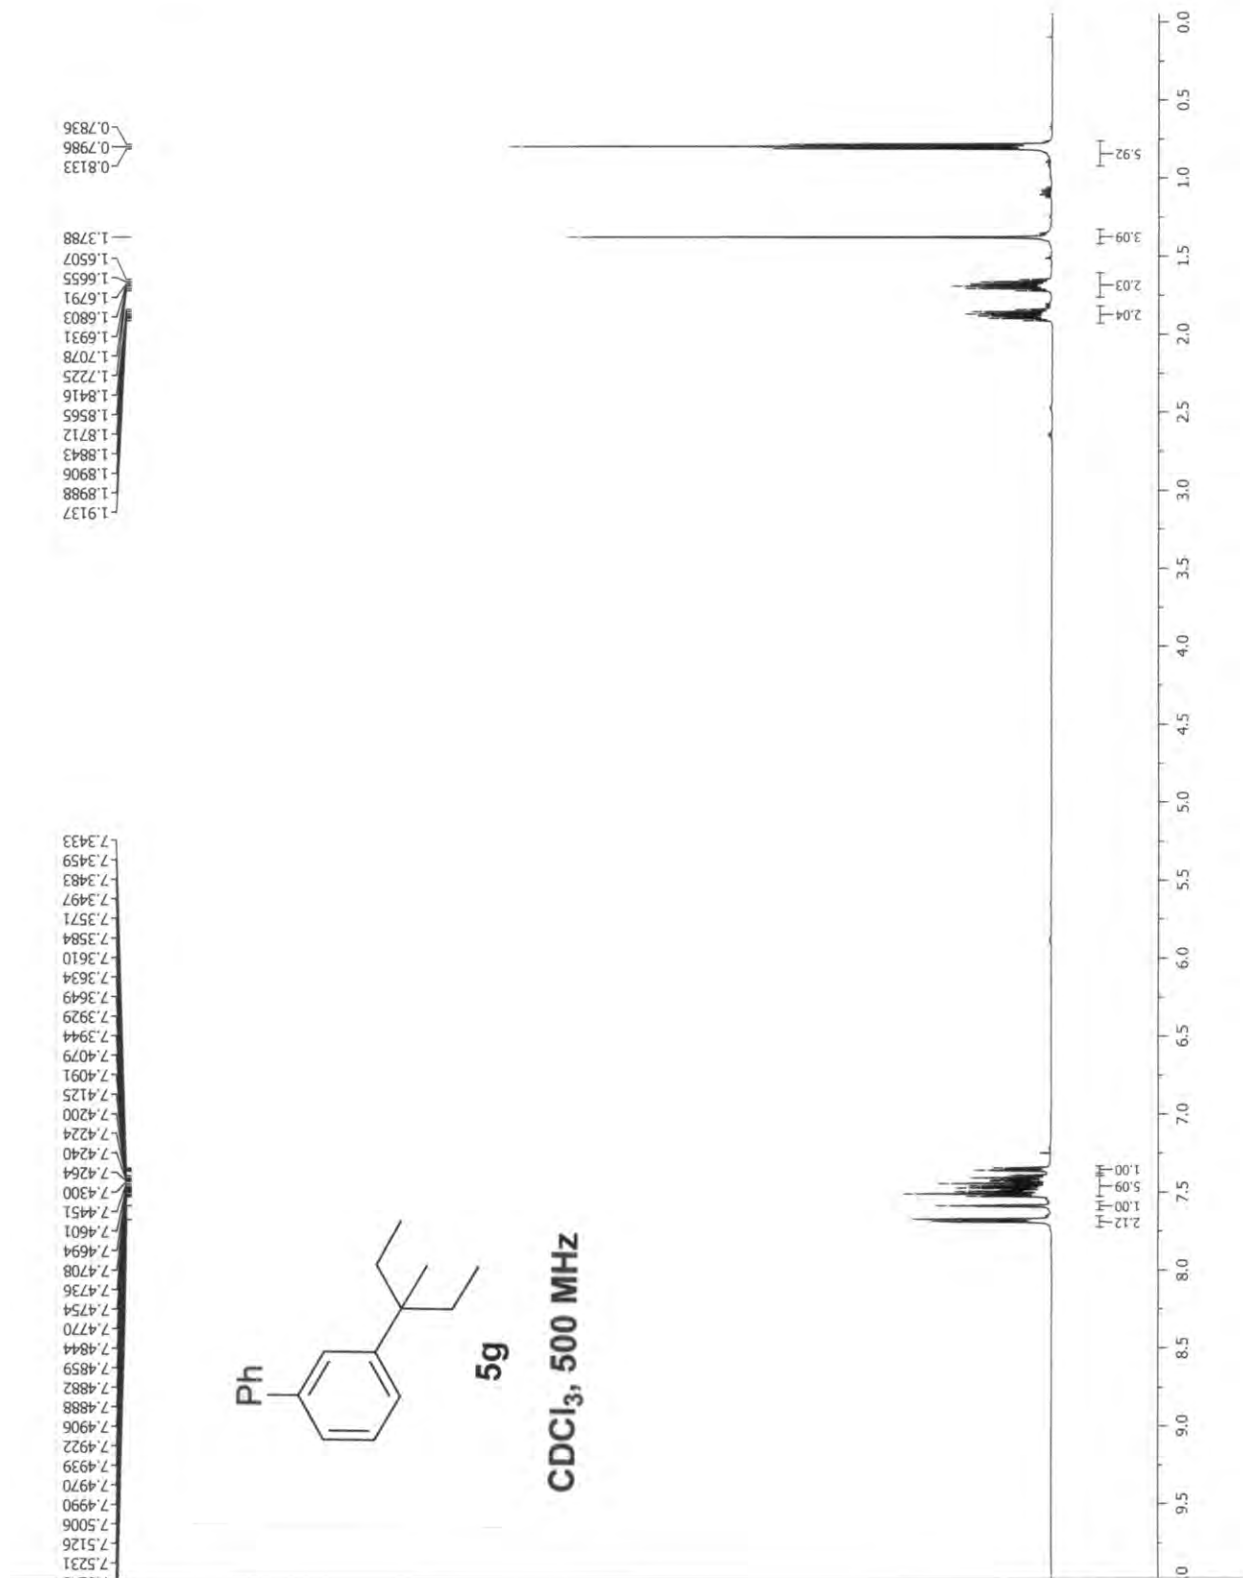

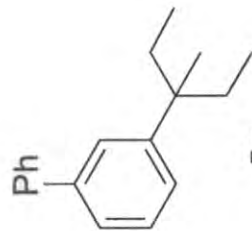

5g

CDCl<sub>3</sub>, 125 MHz

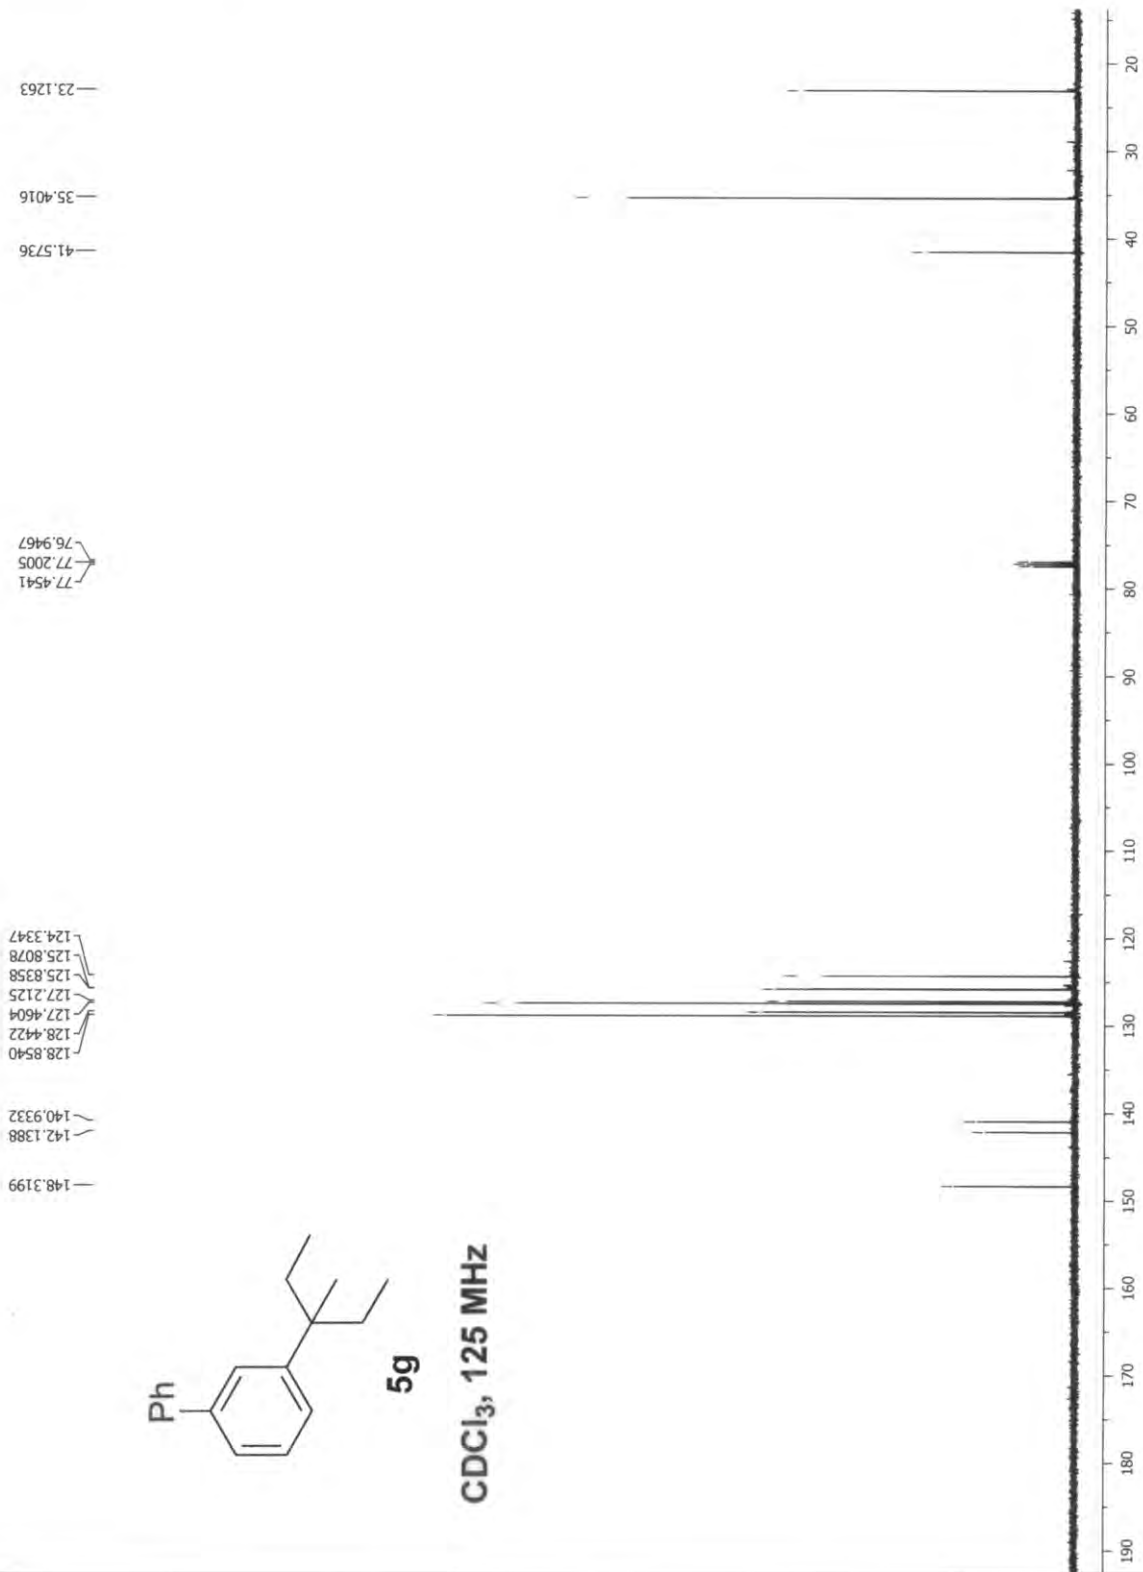

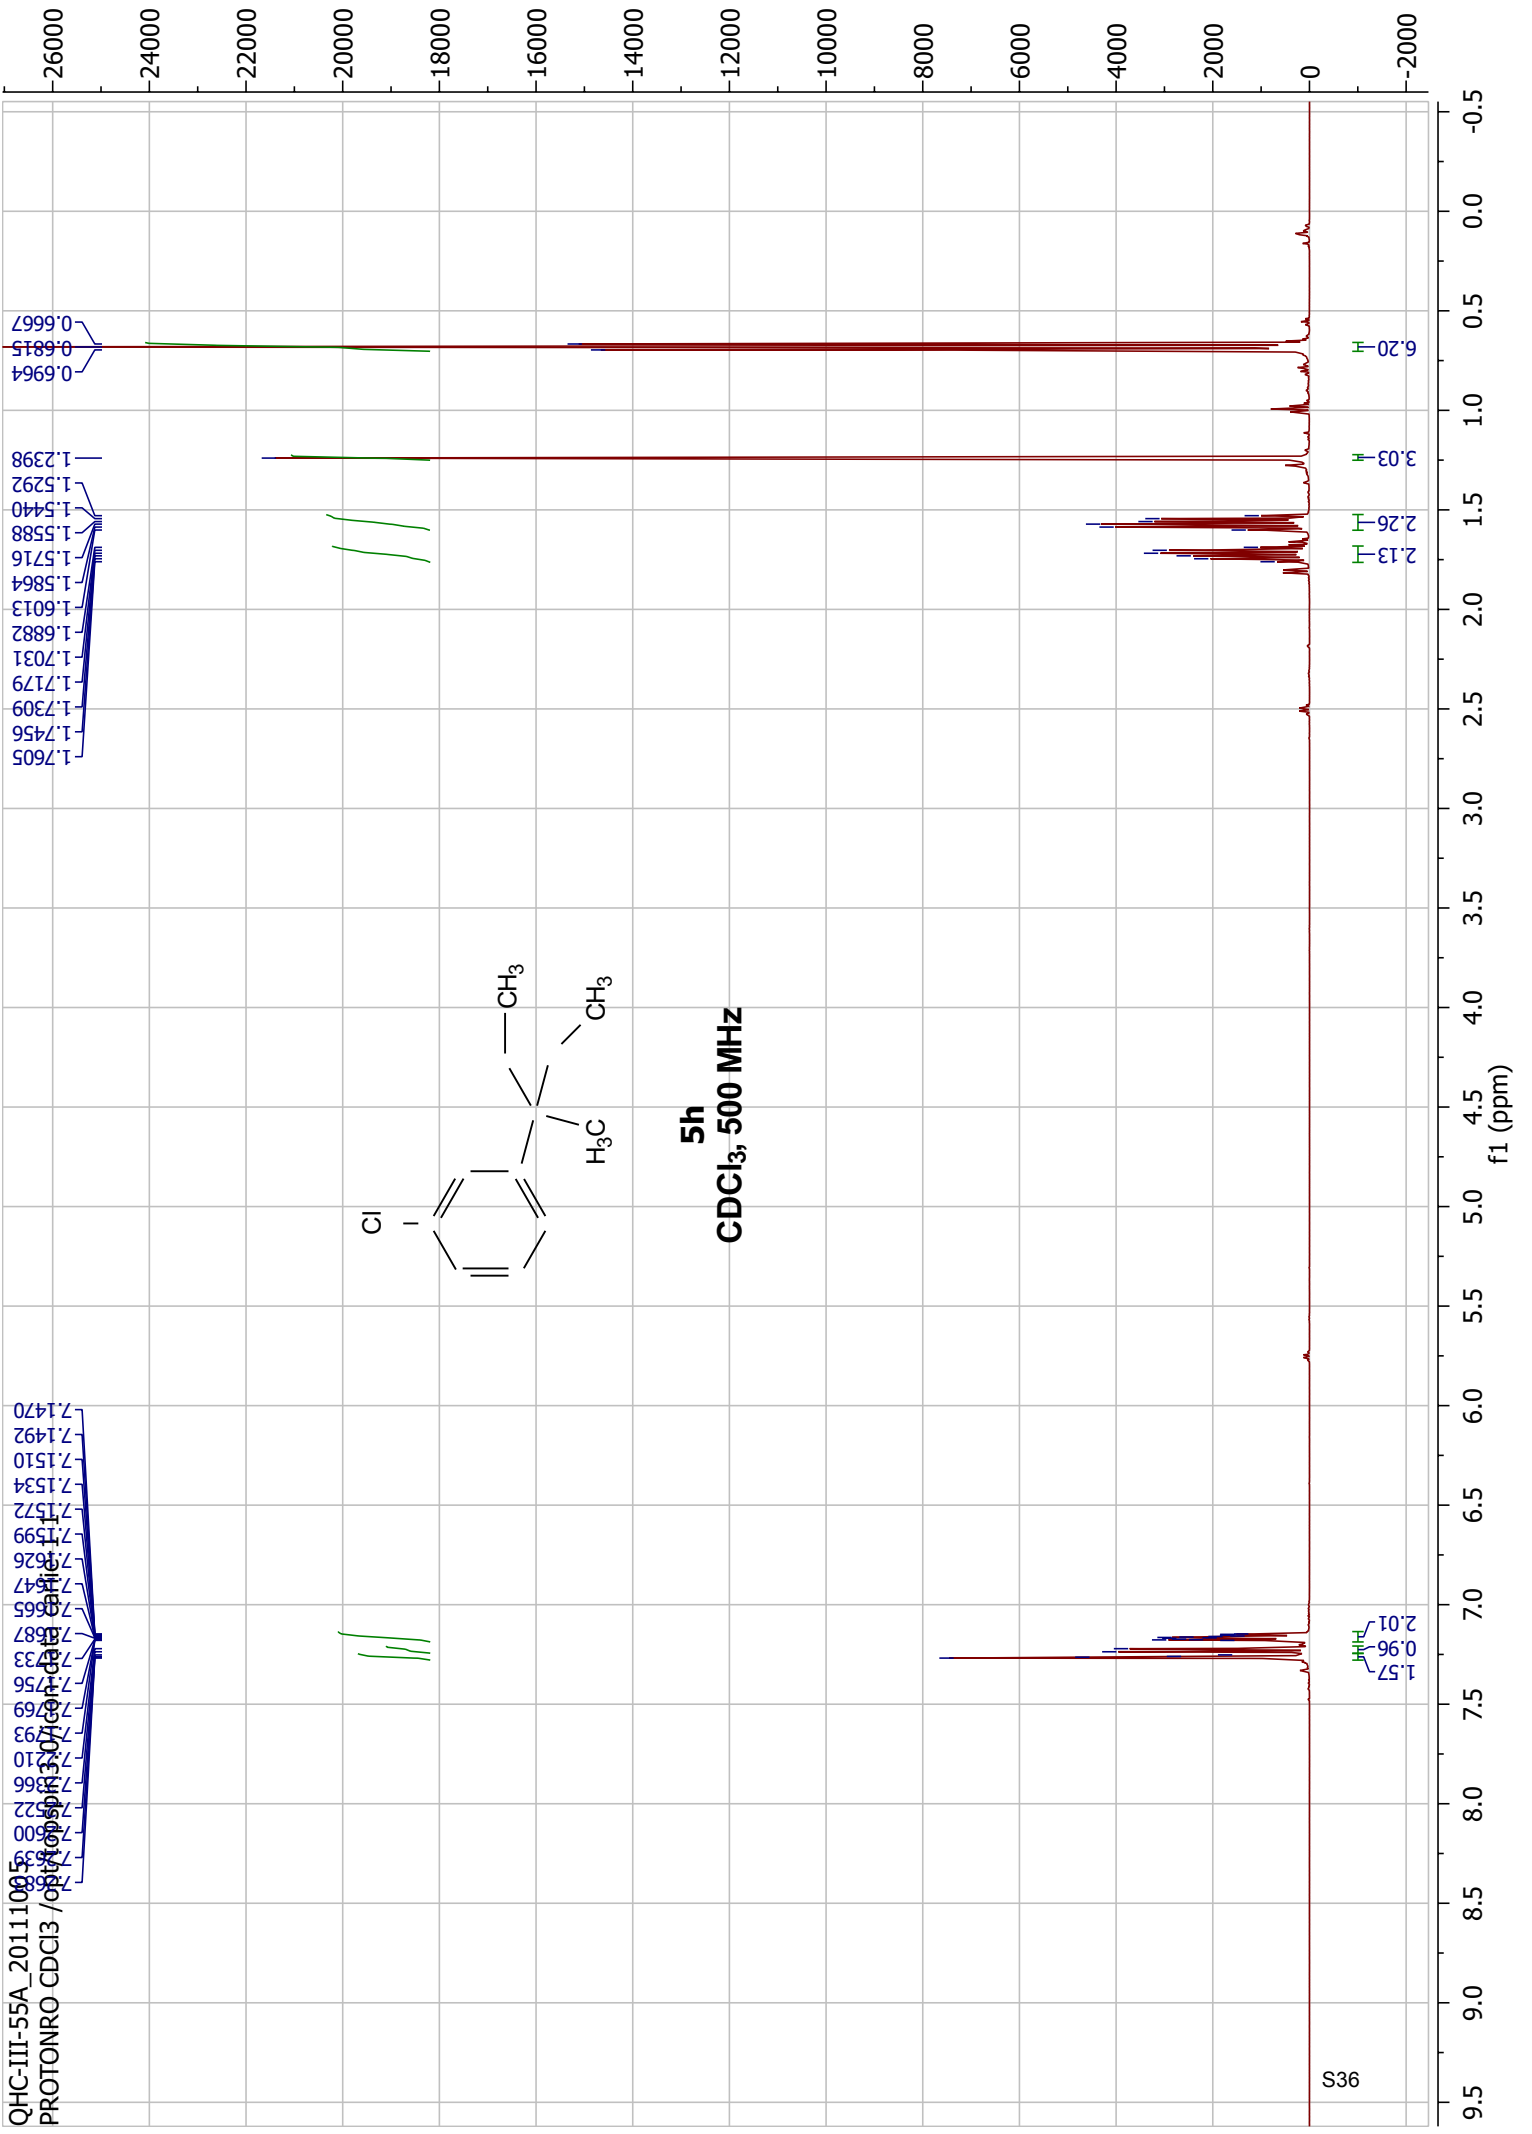

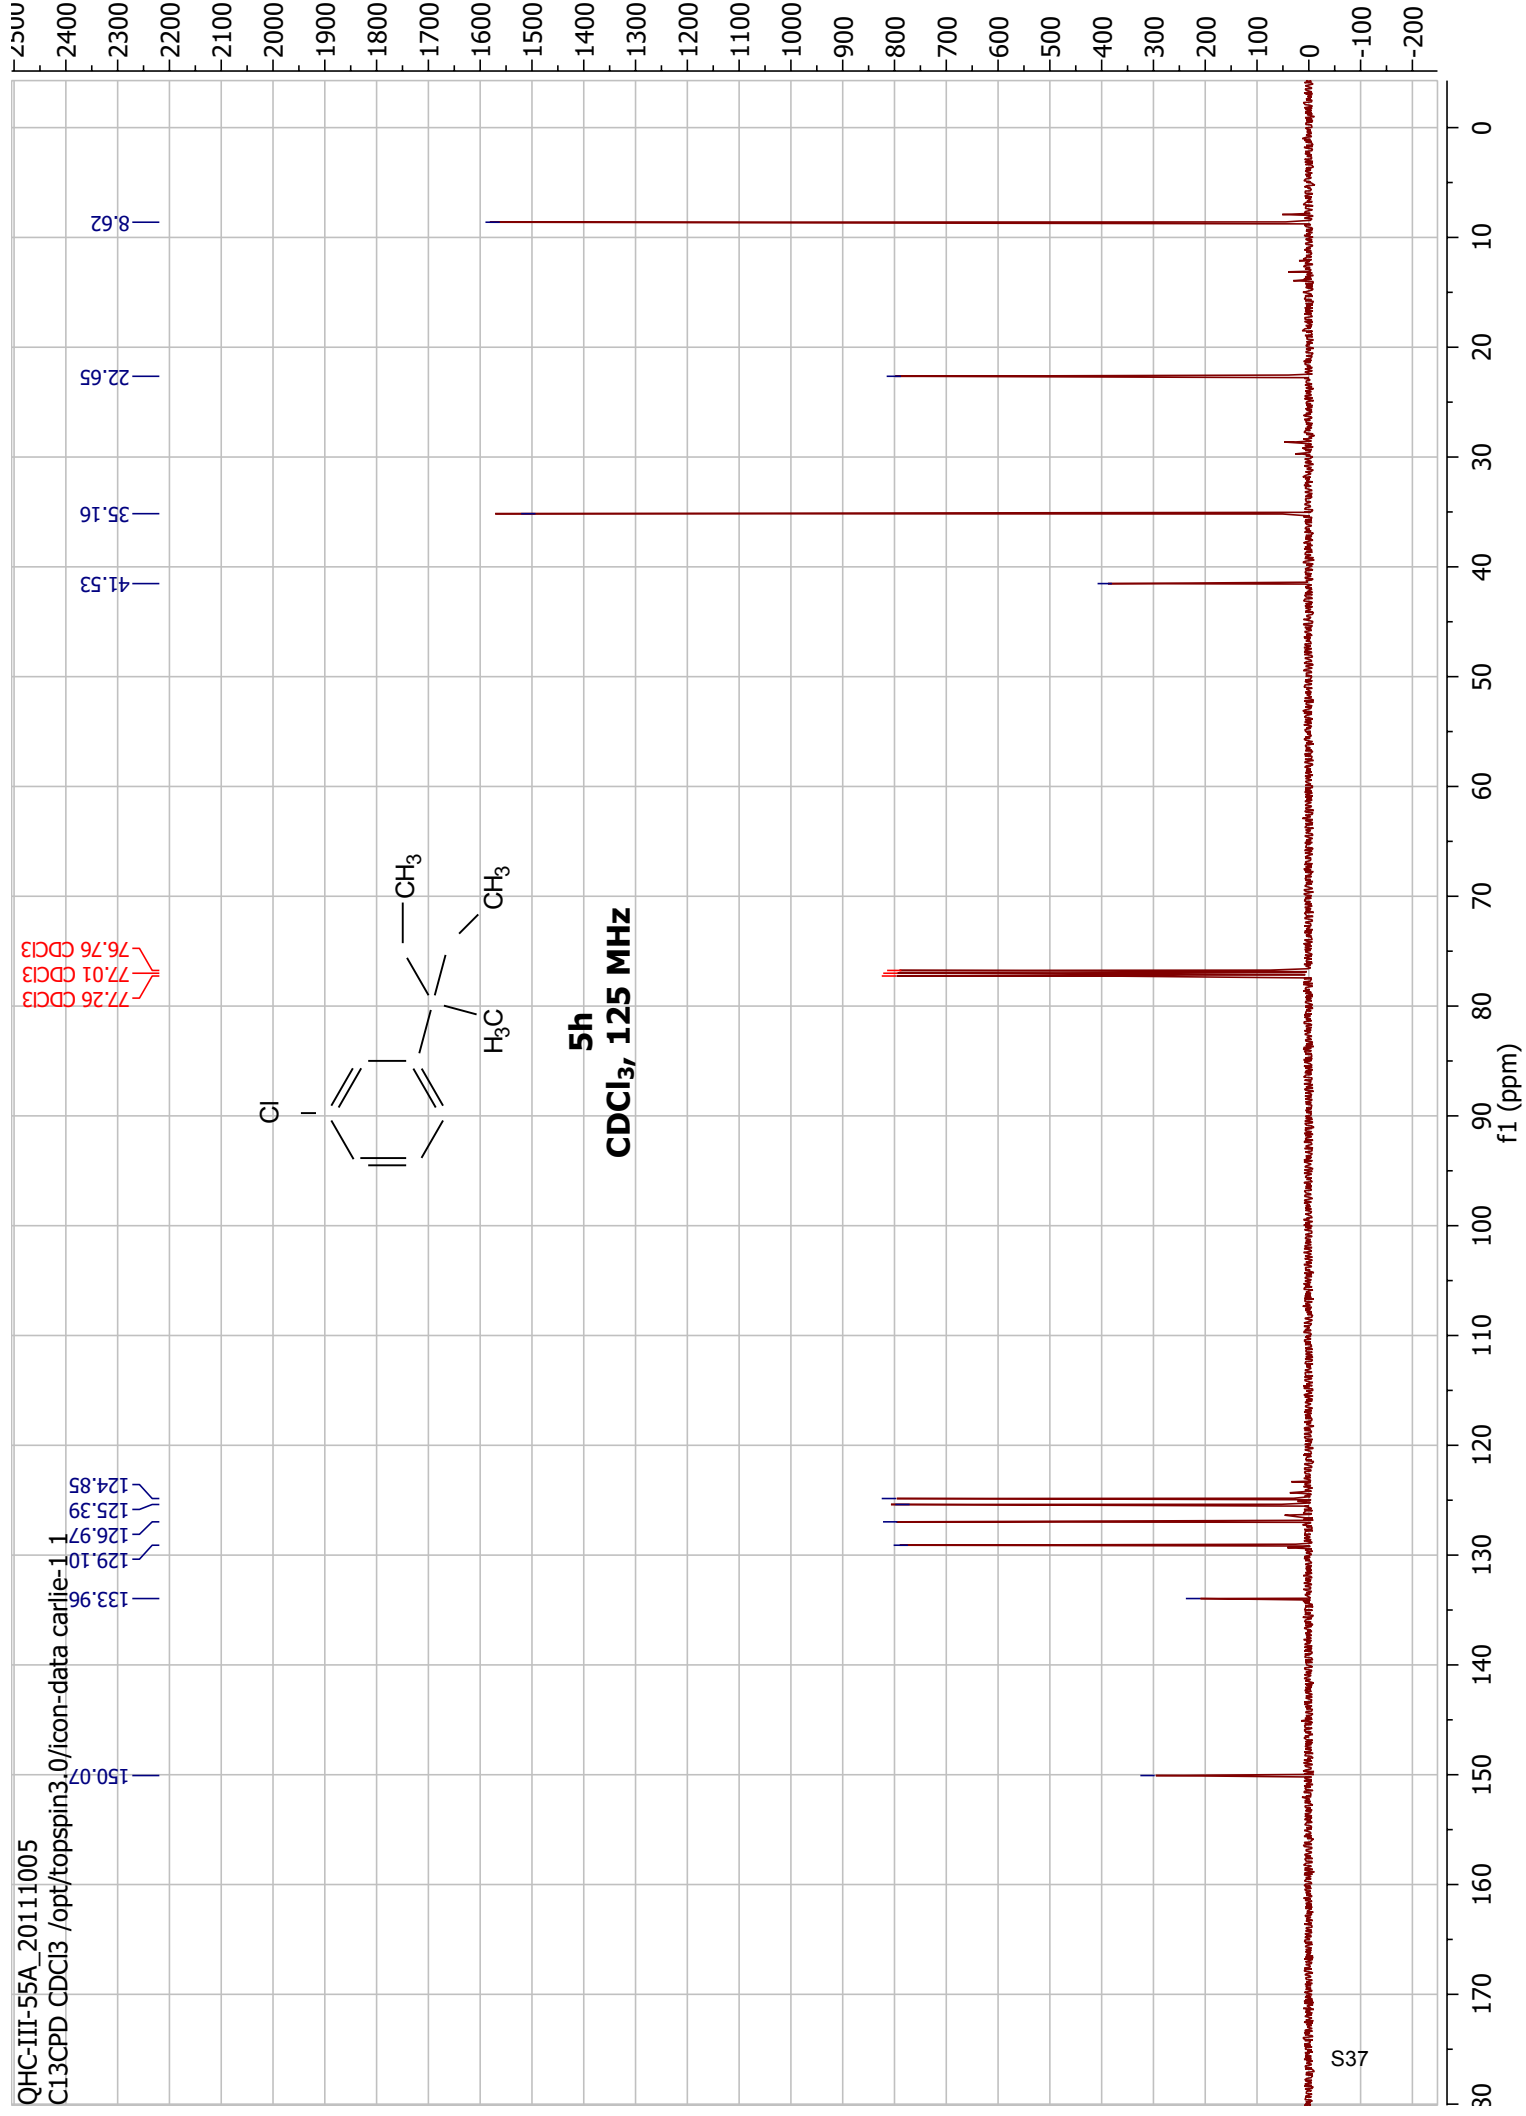

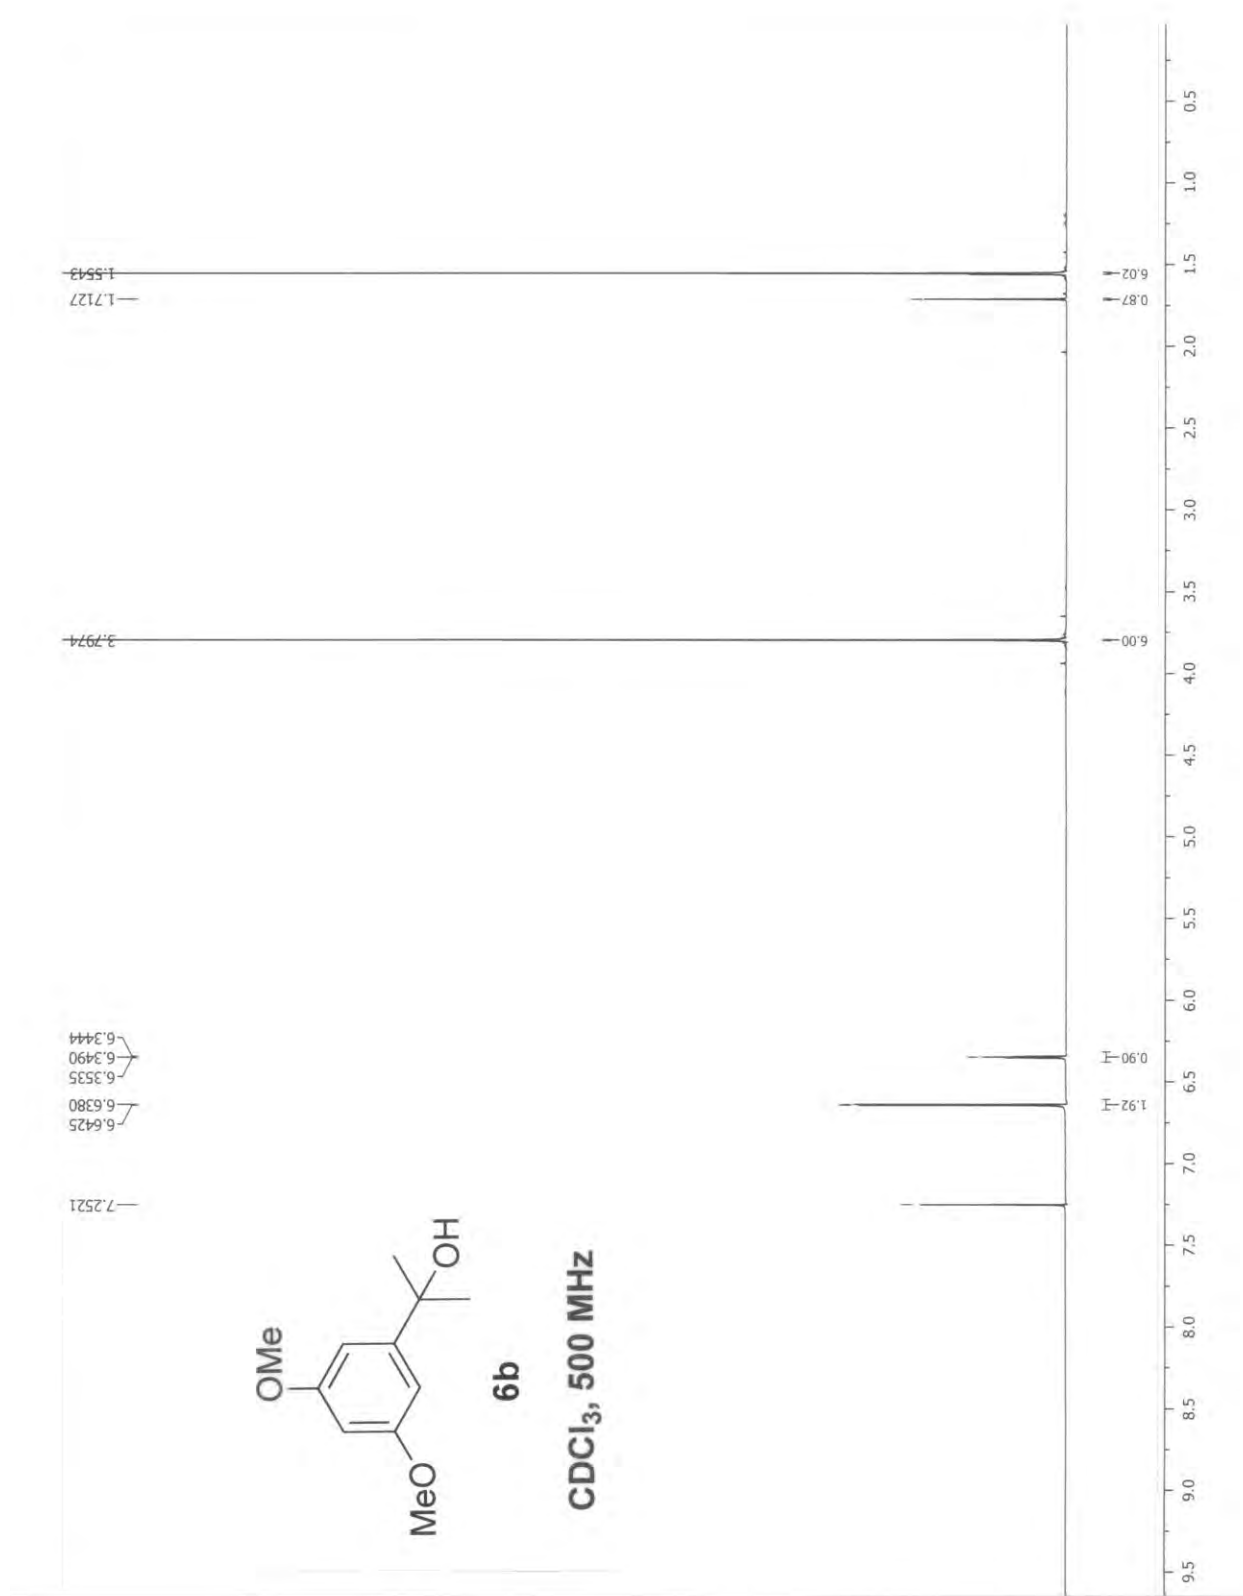

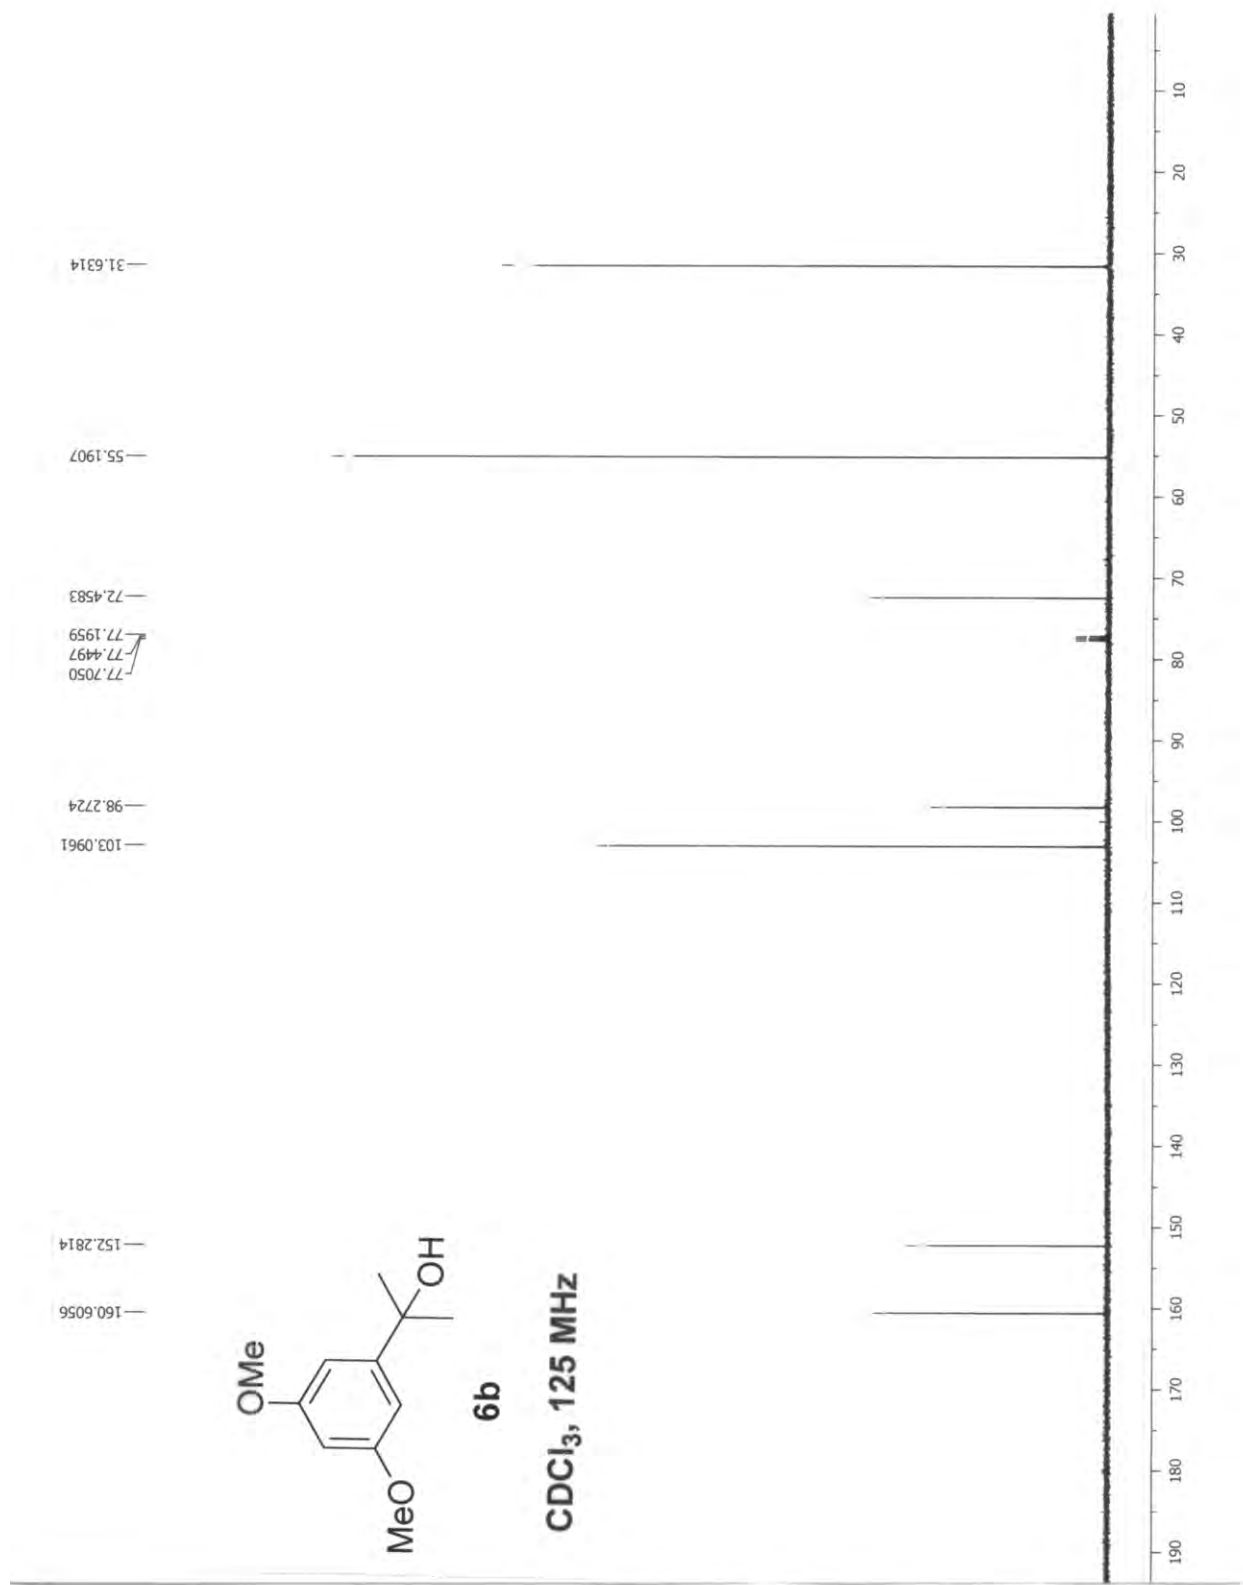

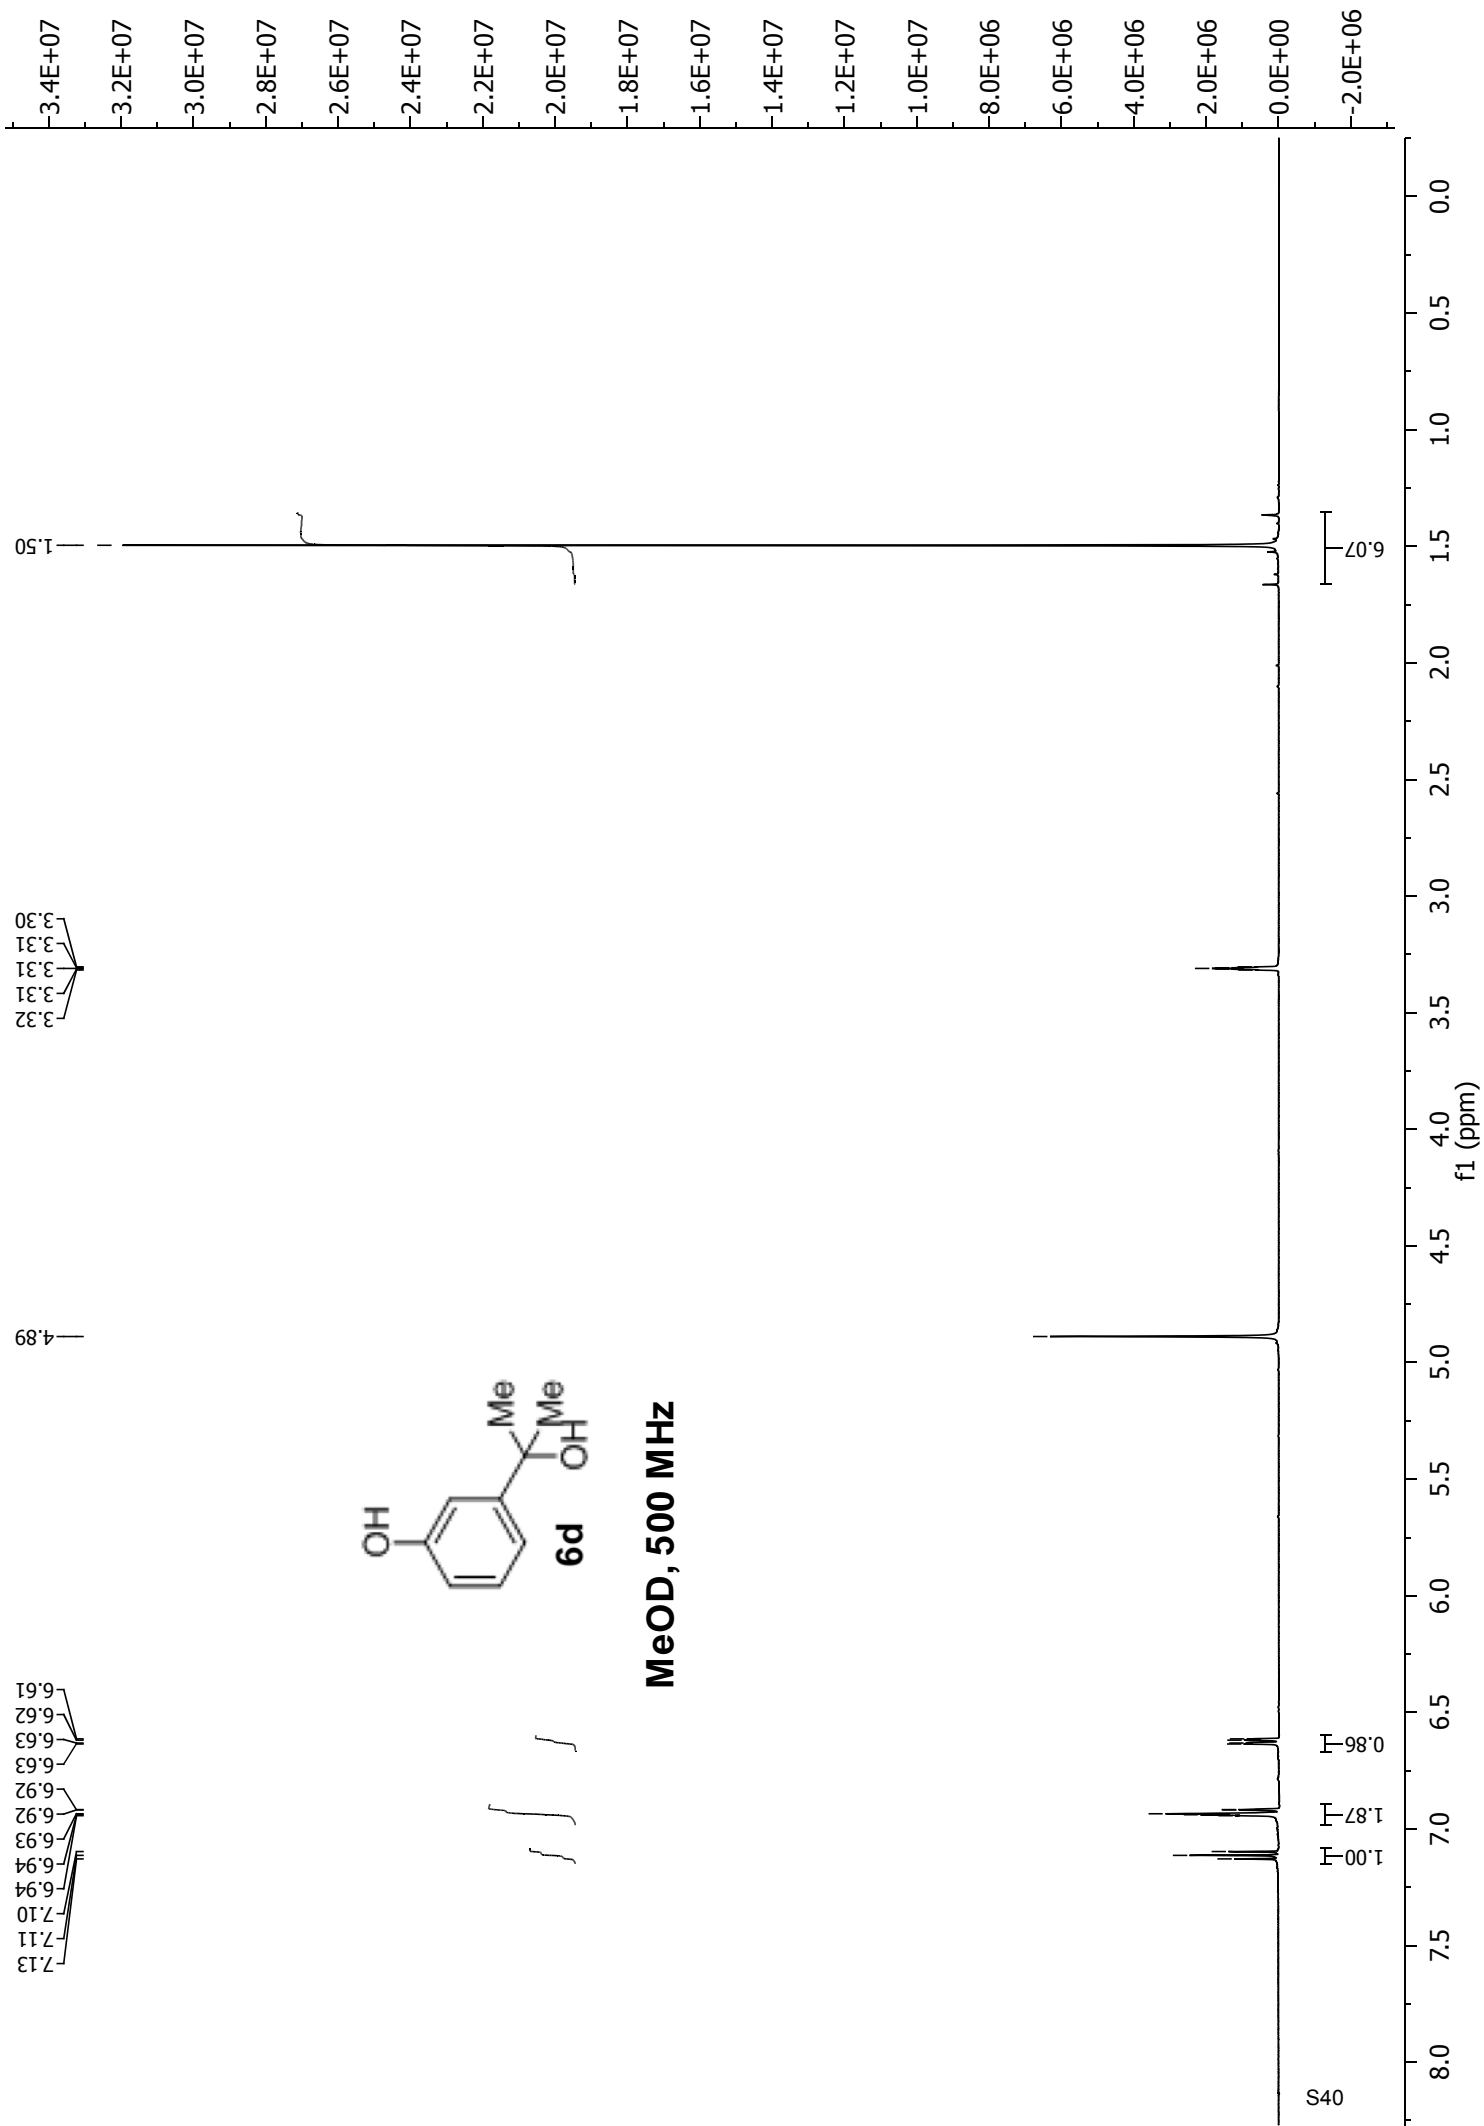



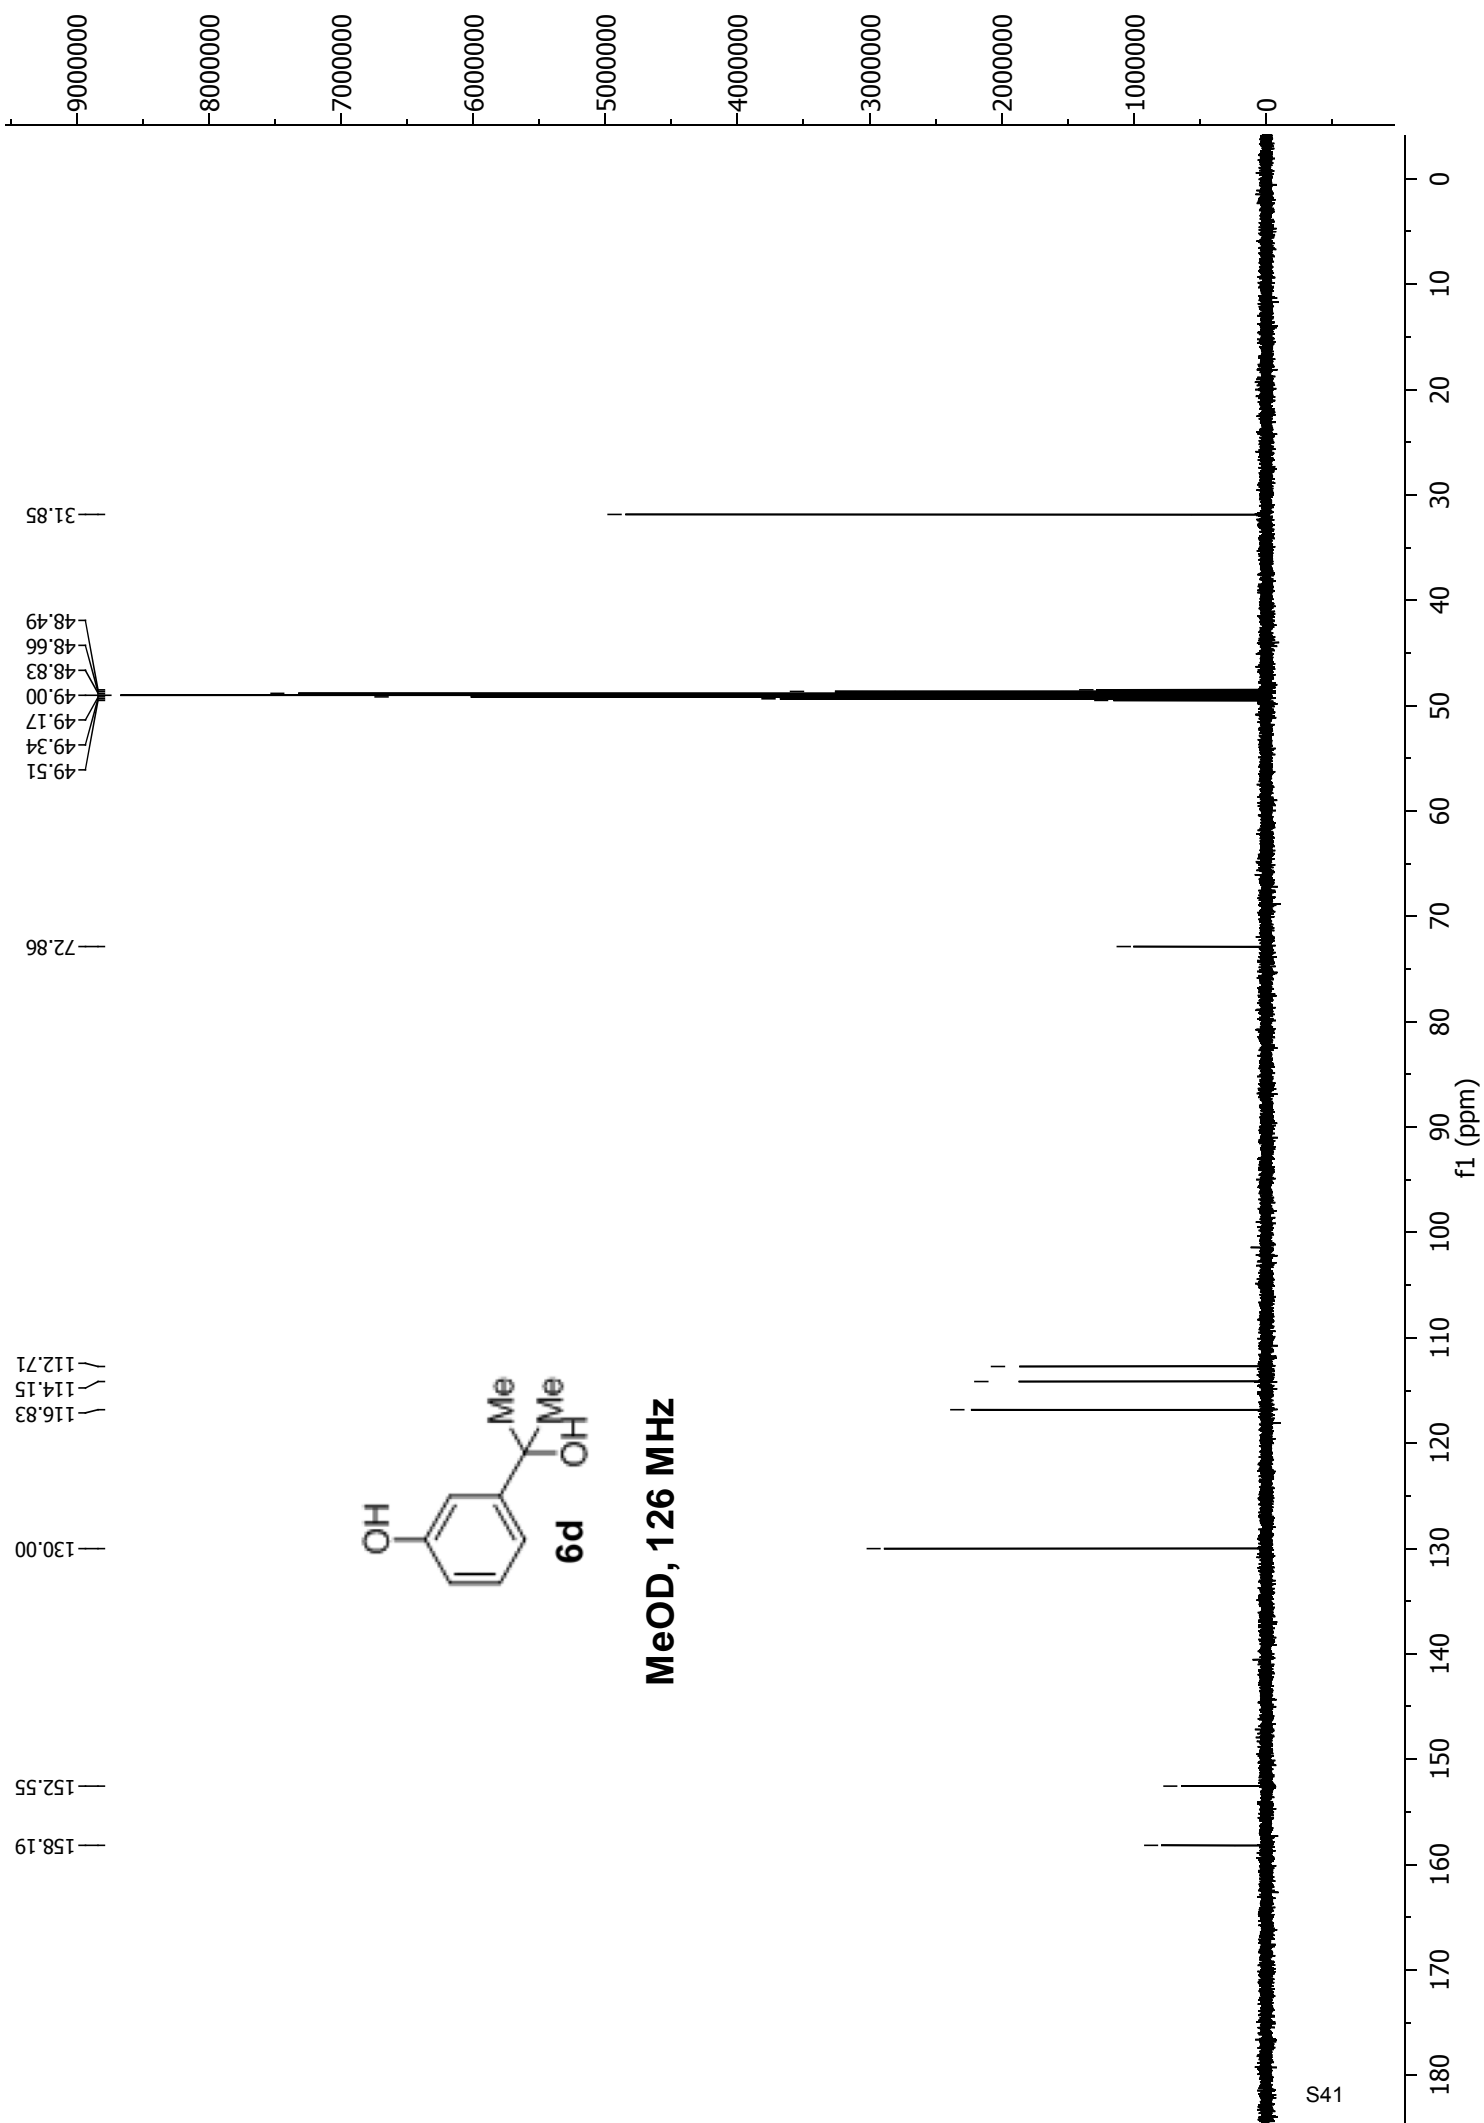

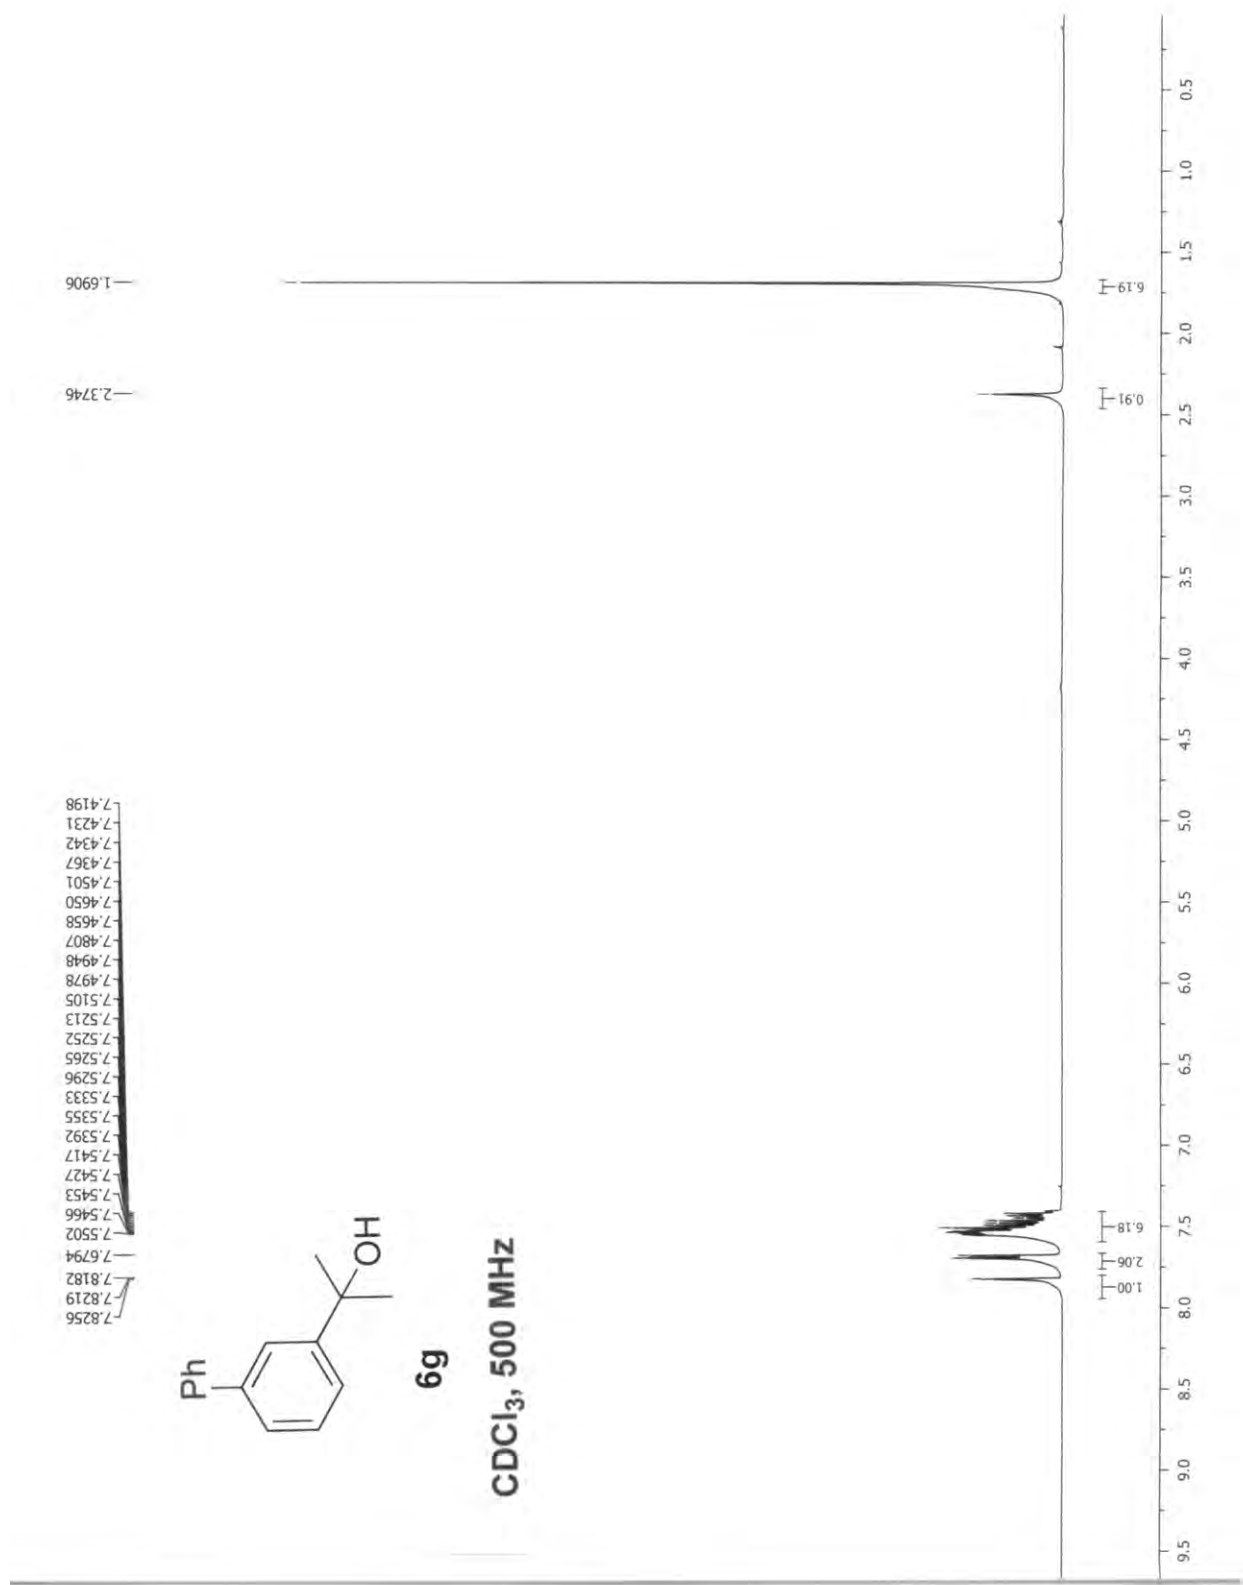

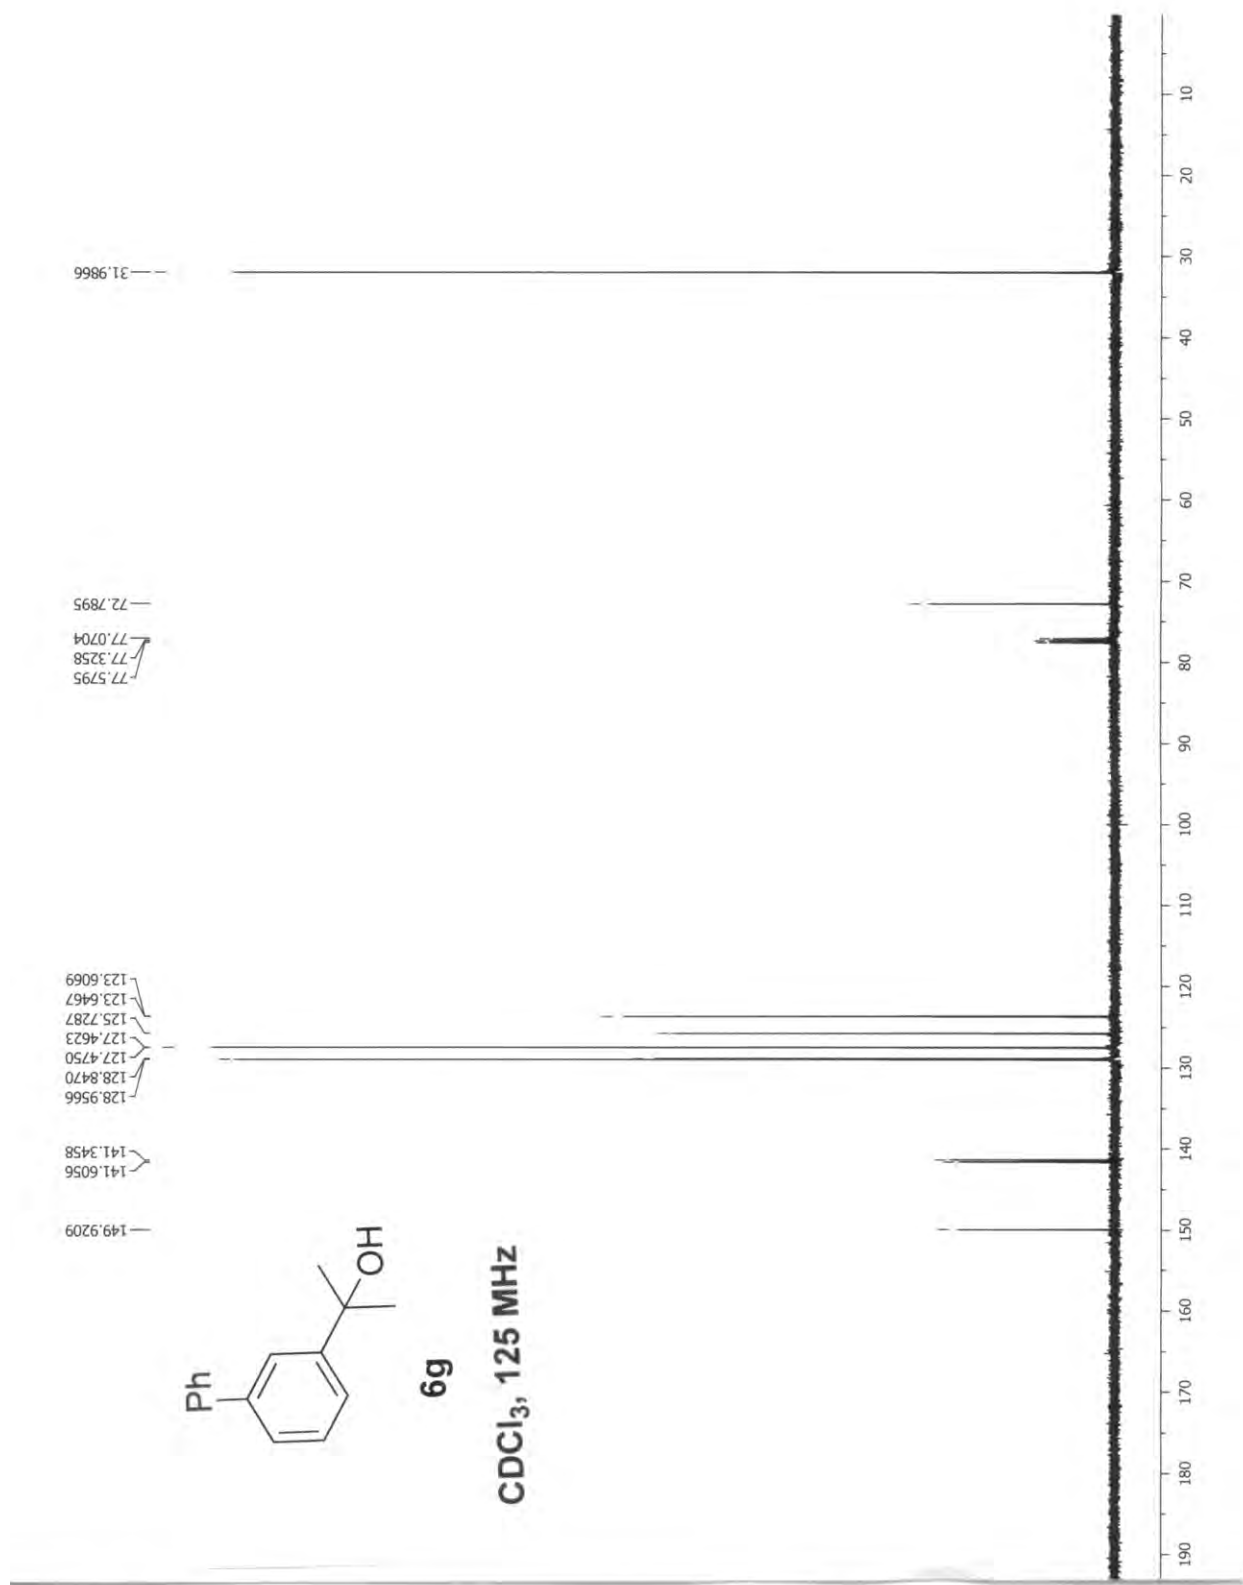

OHGJH-88-1  
PROTON RG-CDCl3 /opt/data/carlie-1 1

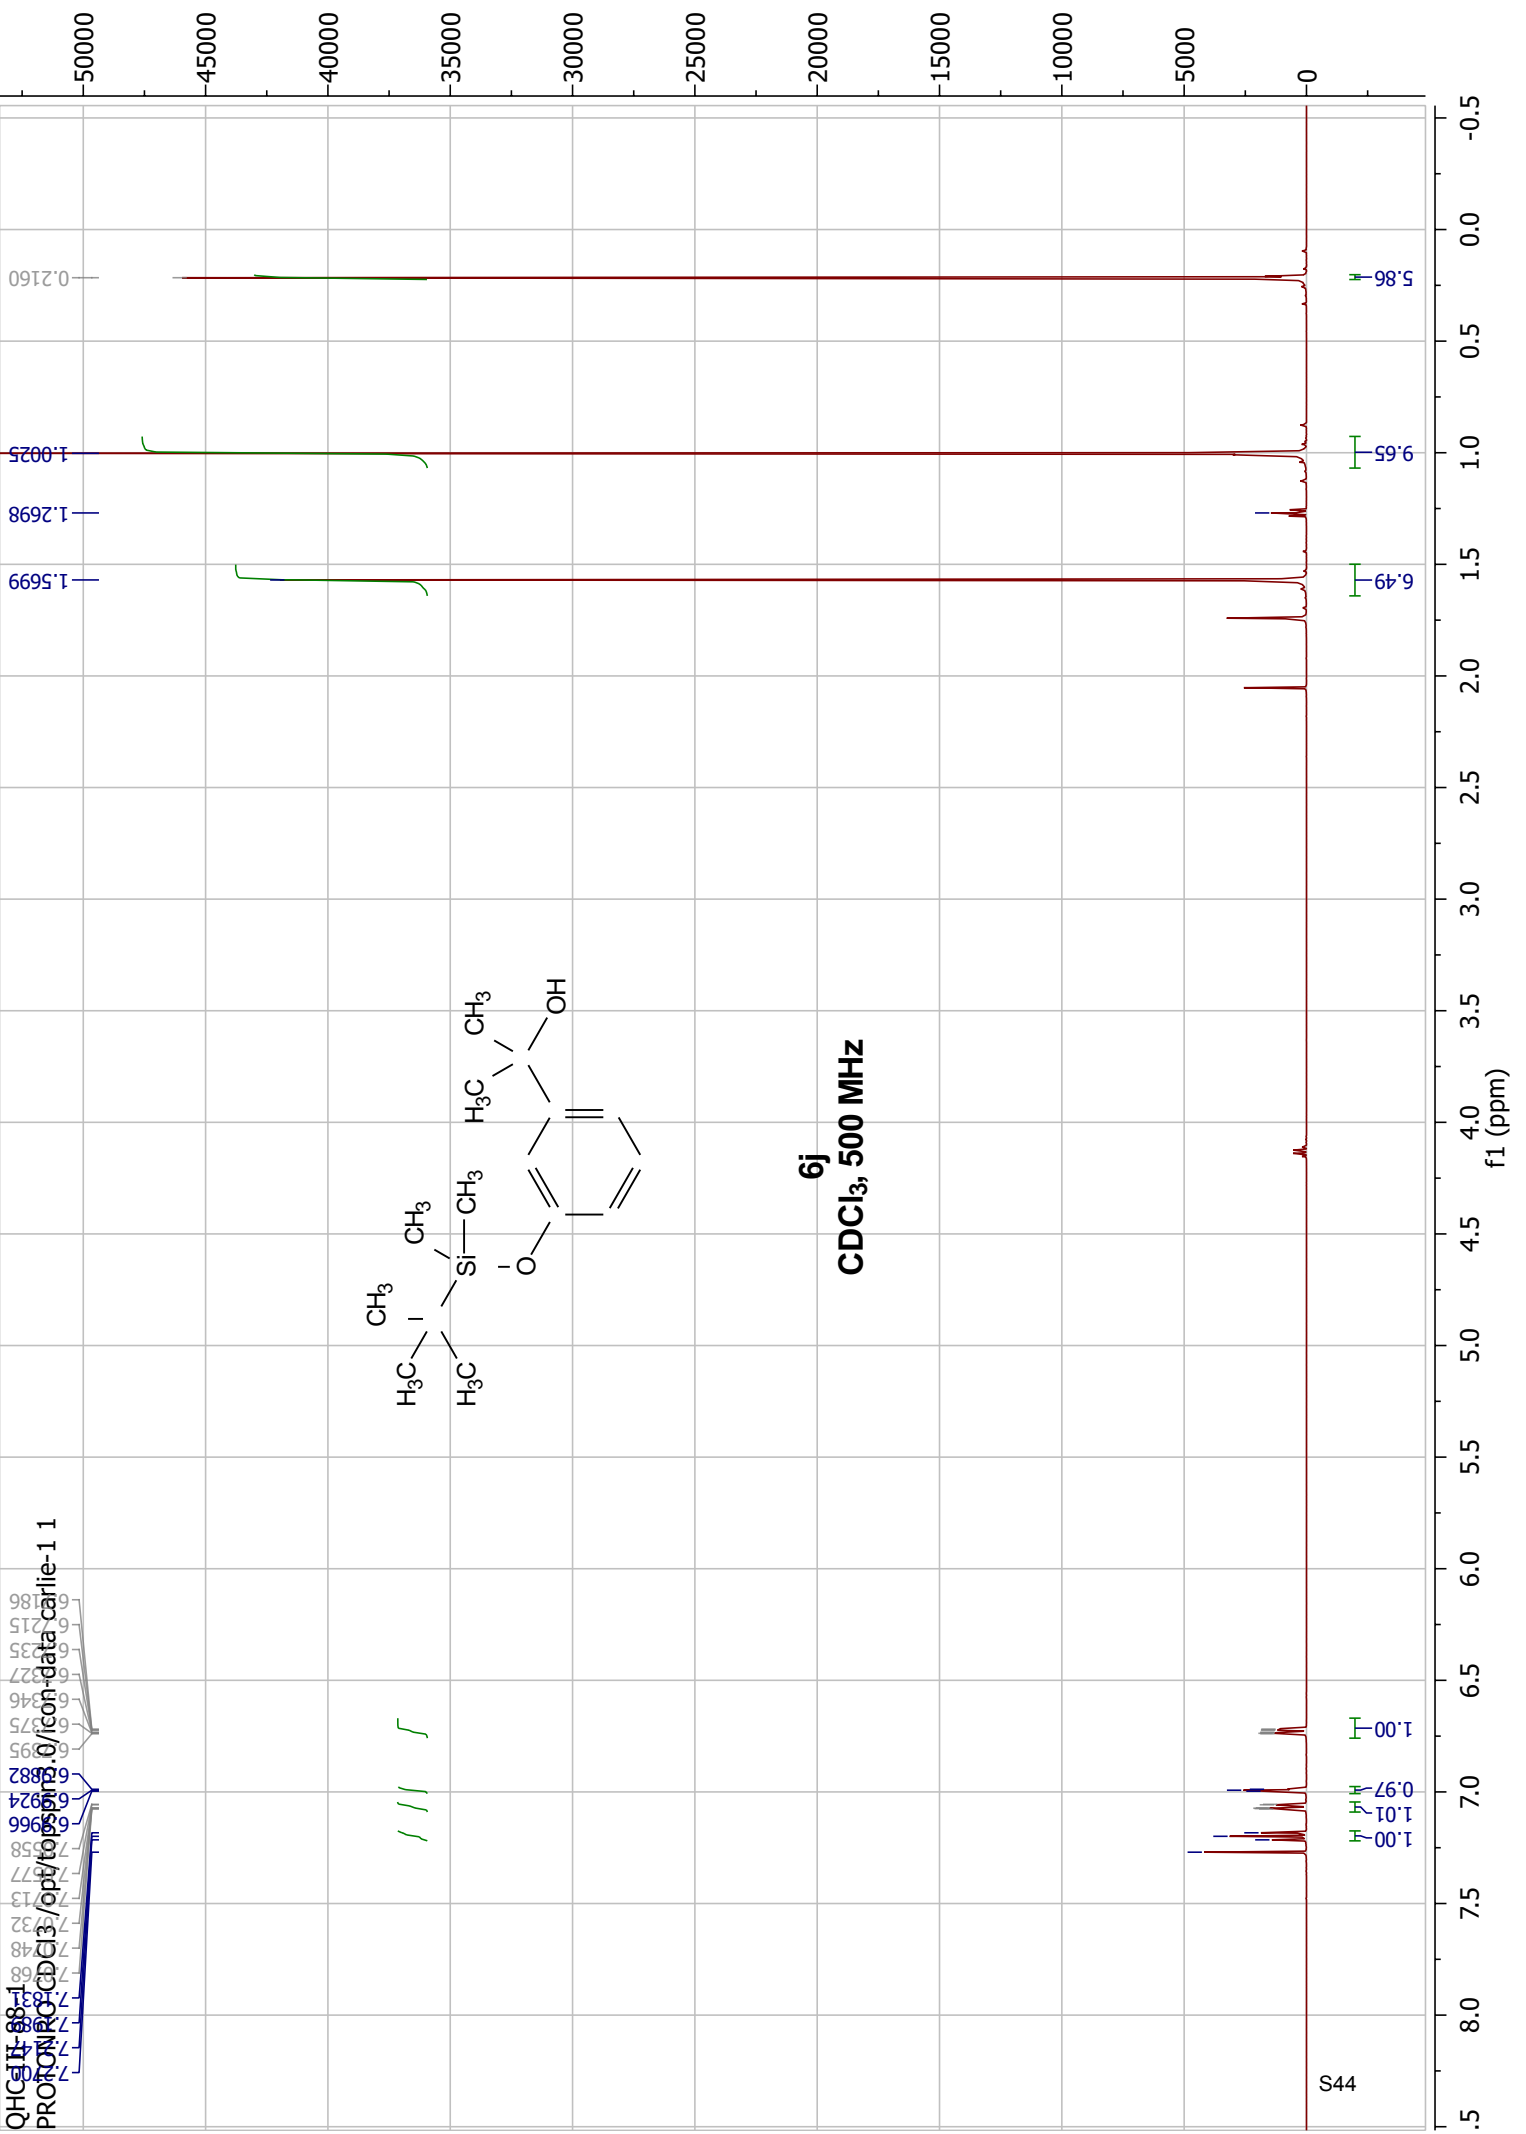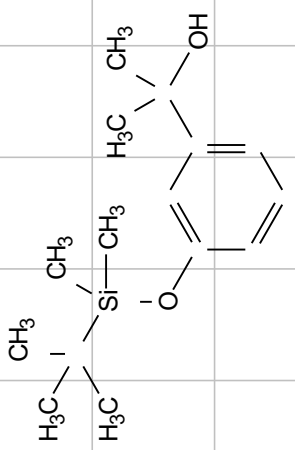

S44

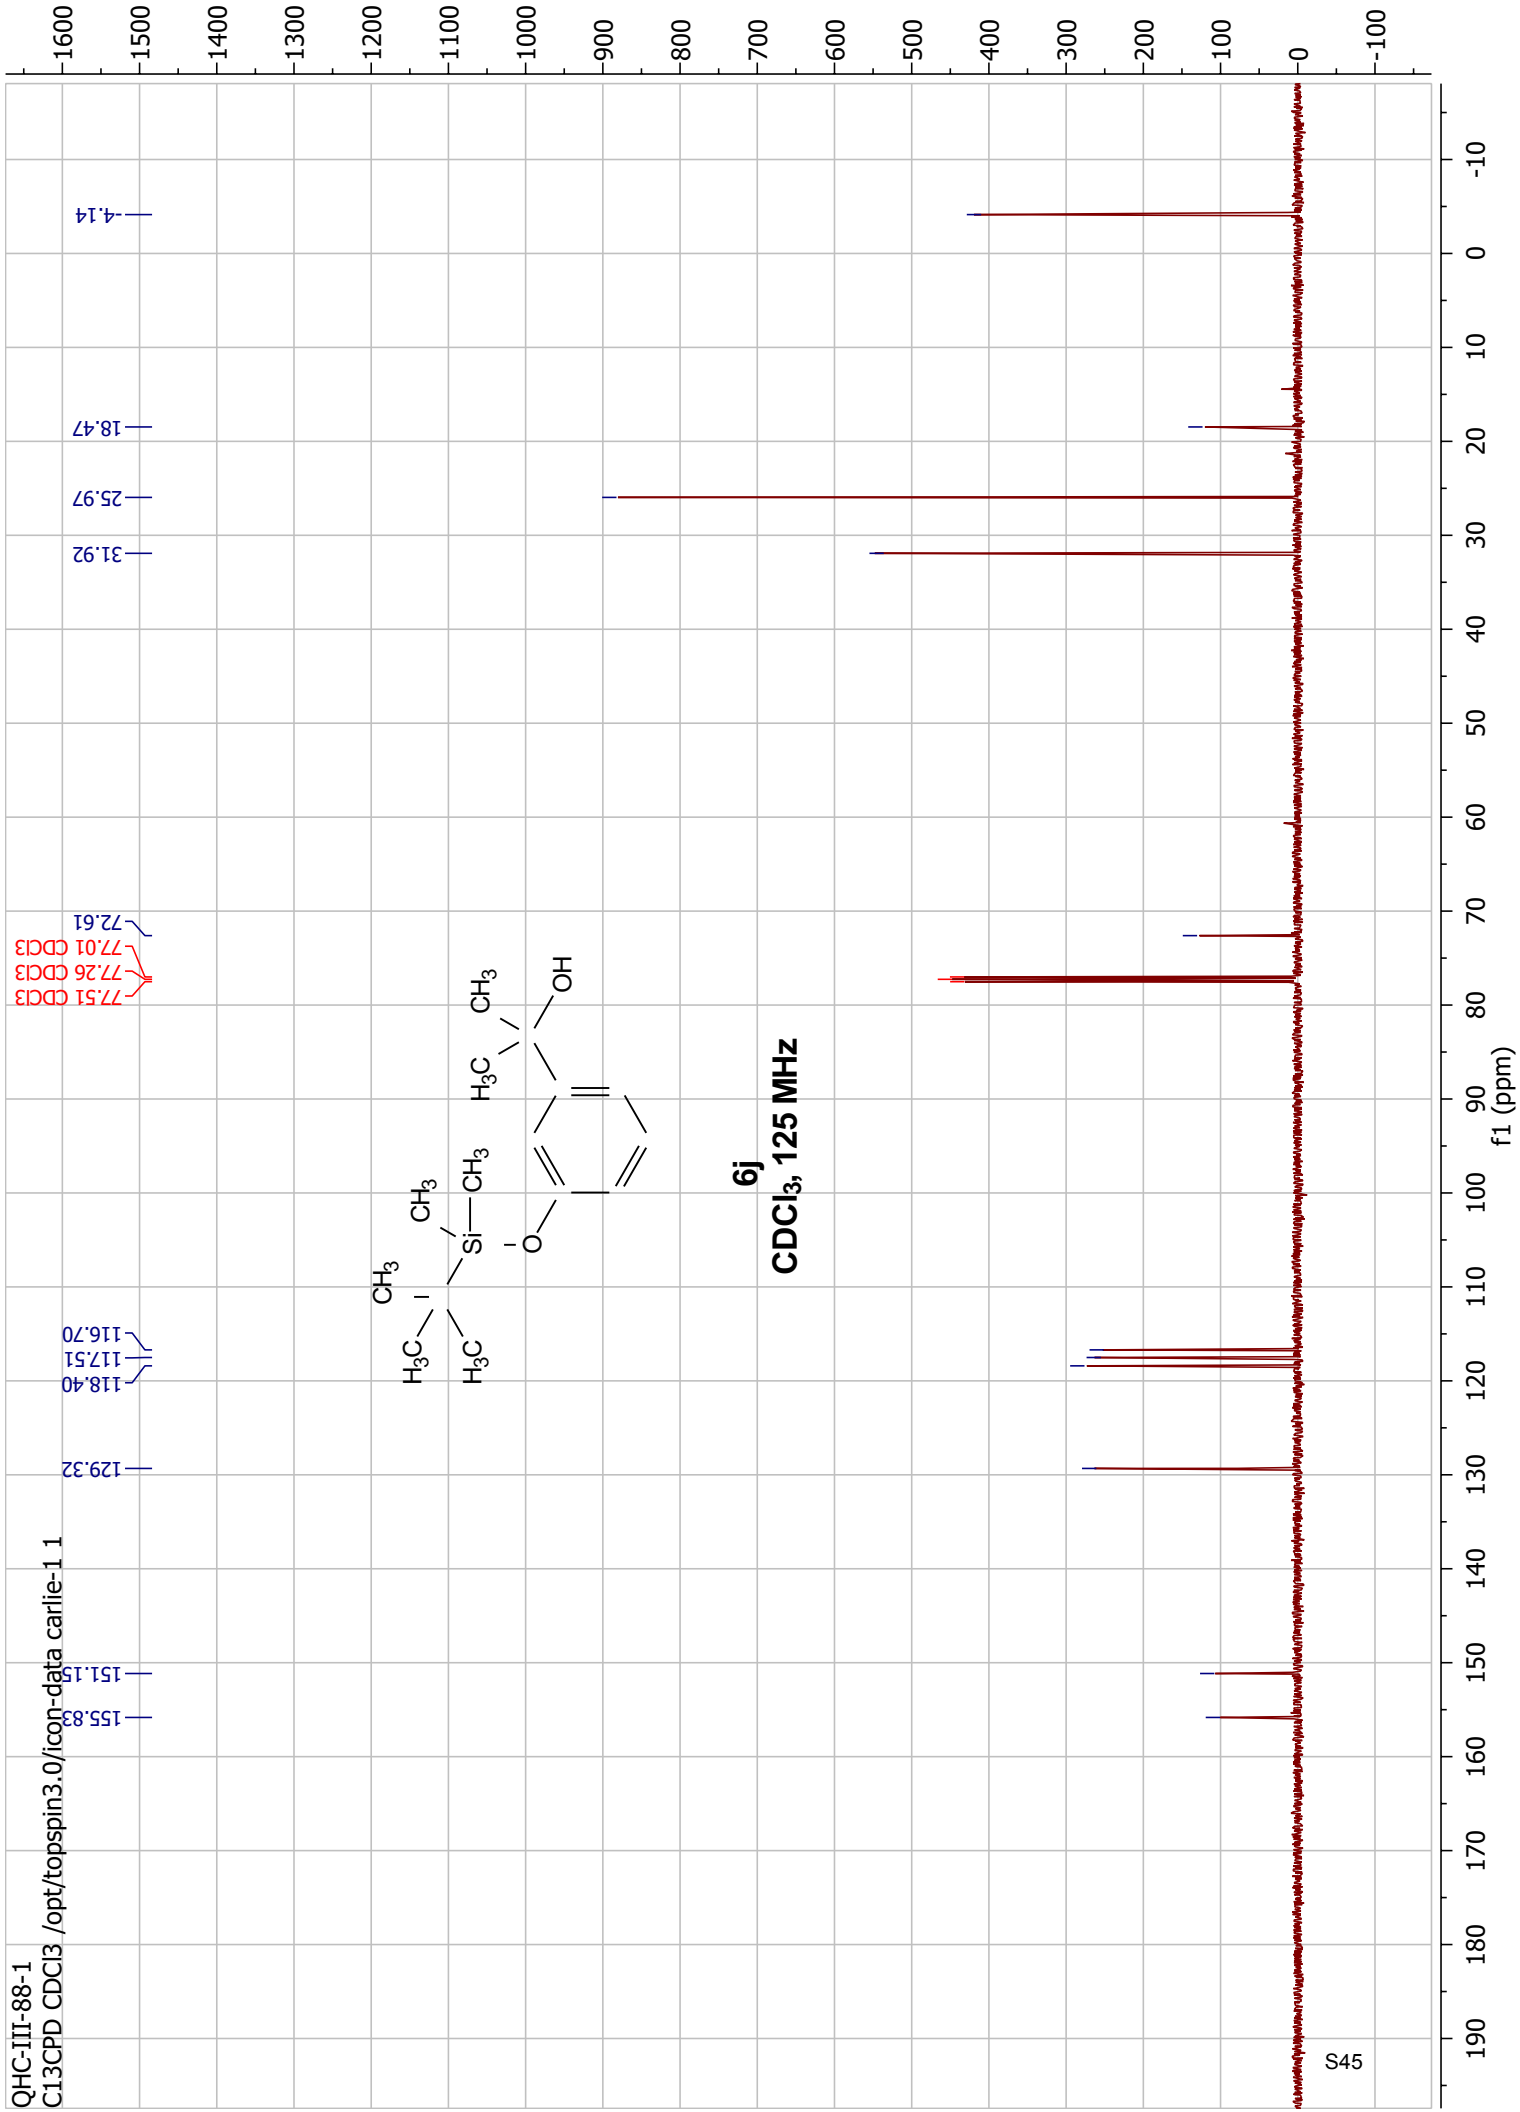

MM-HV-175 D-Methanol

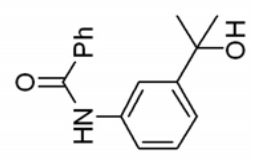

6k

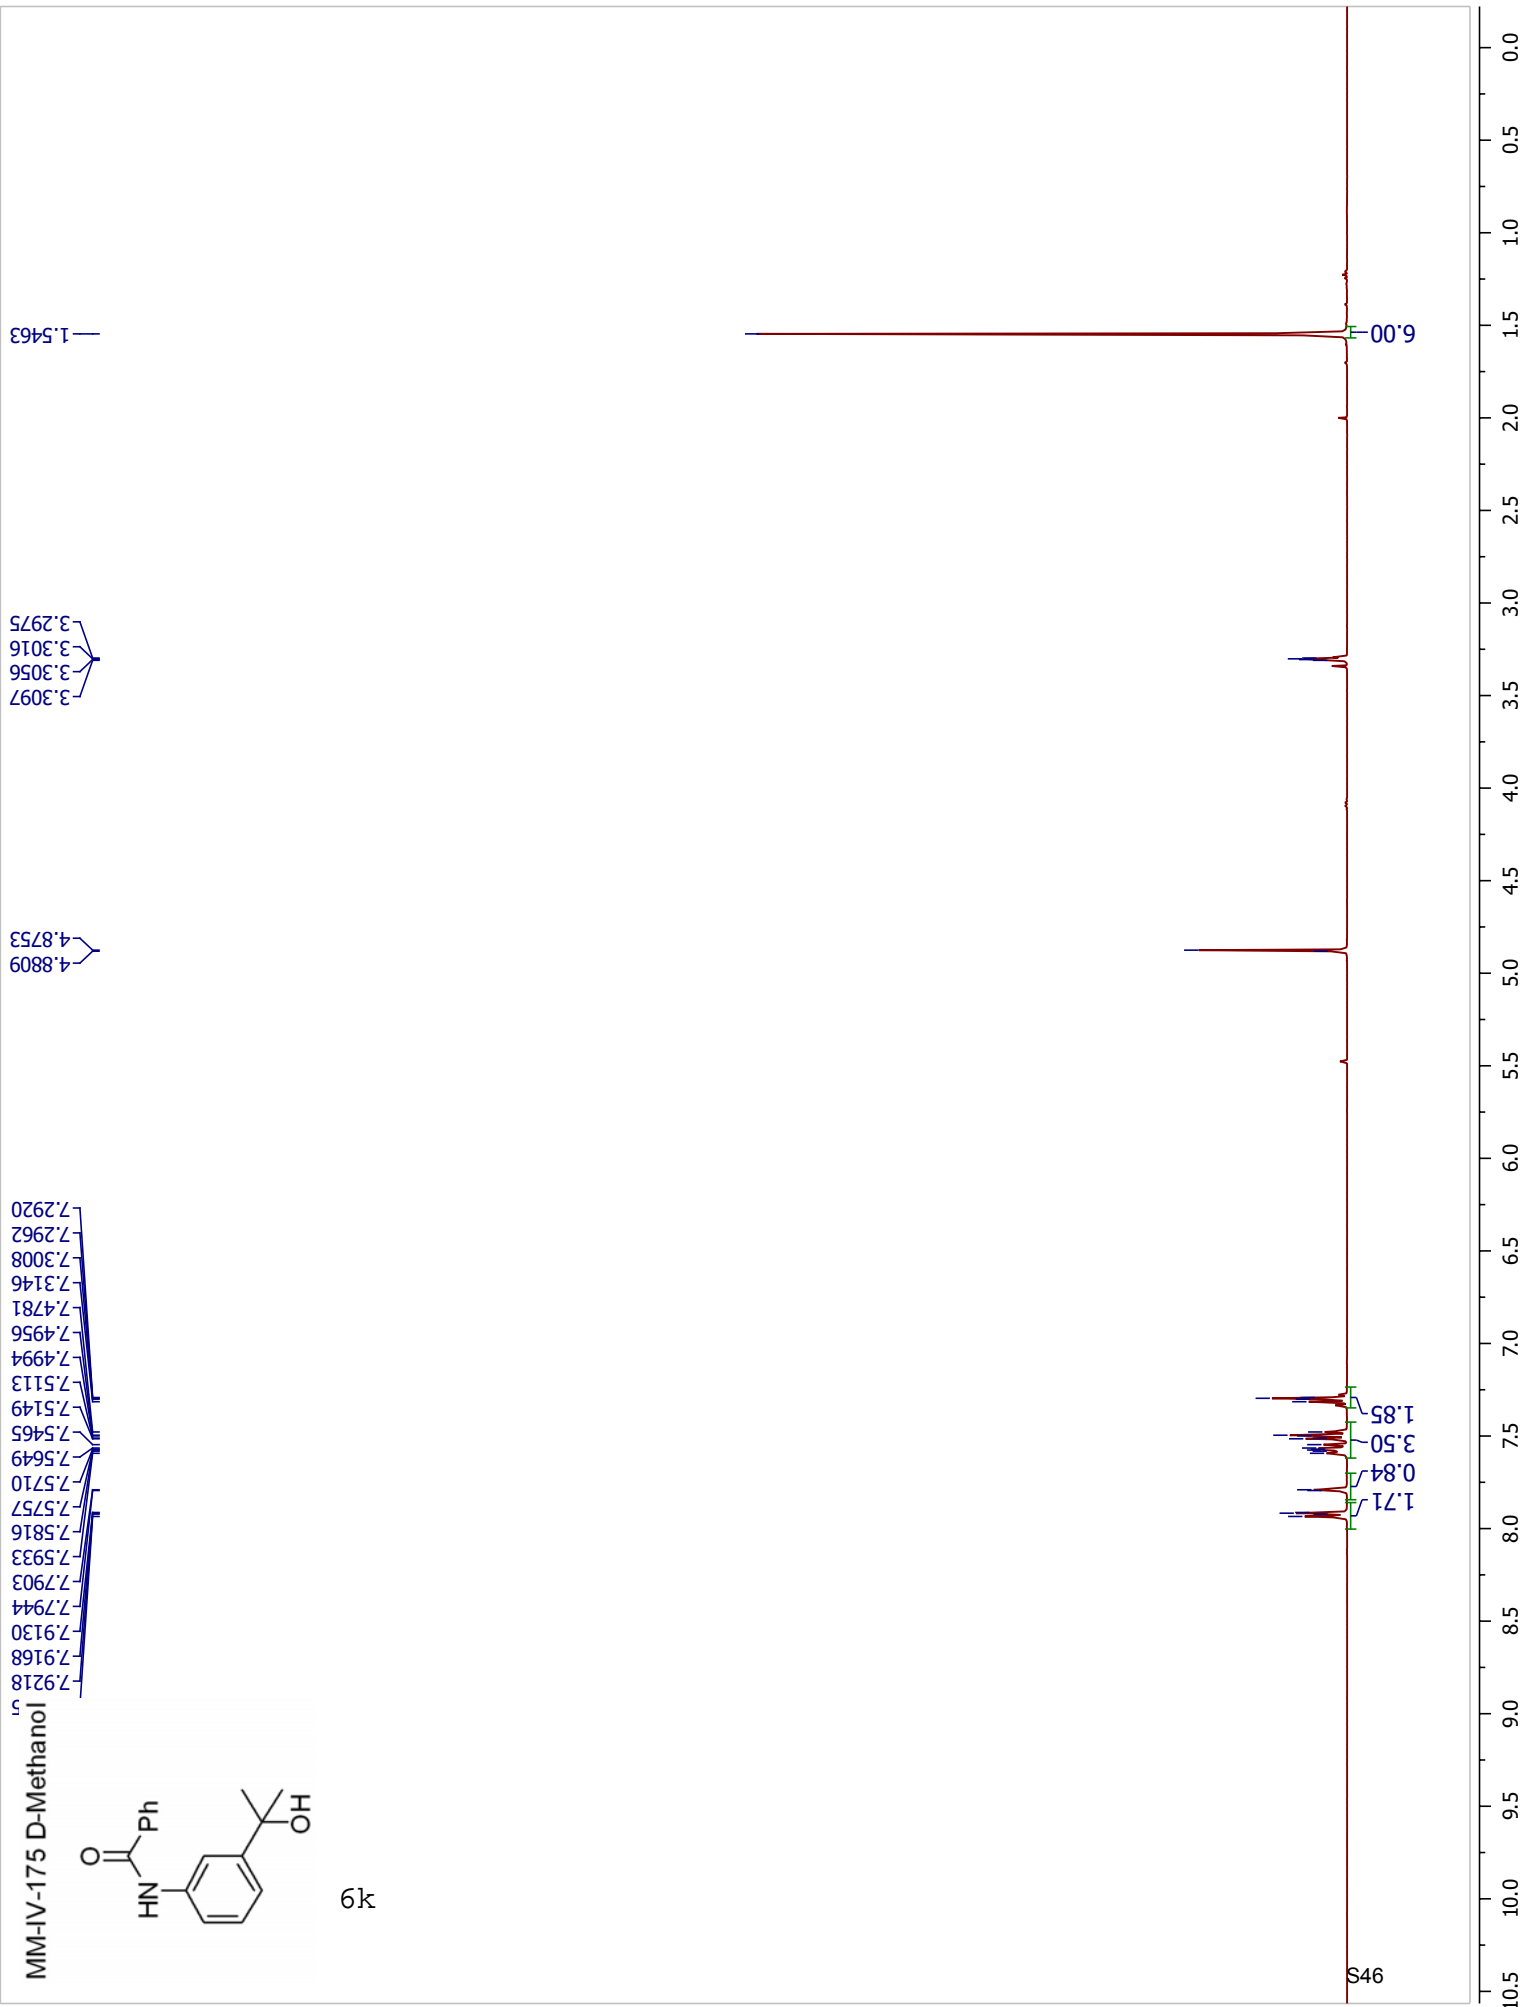

MM-IV-175 D-Methanol

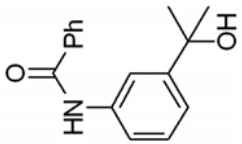

6k

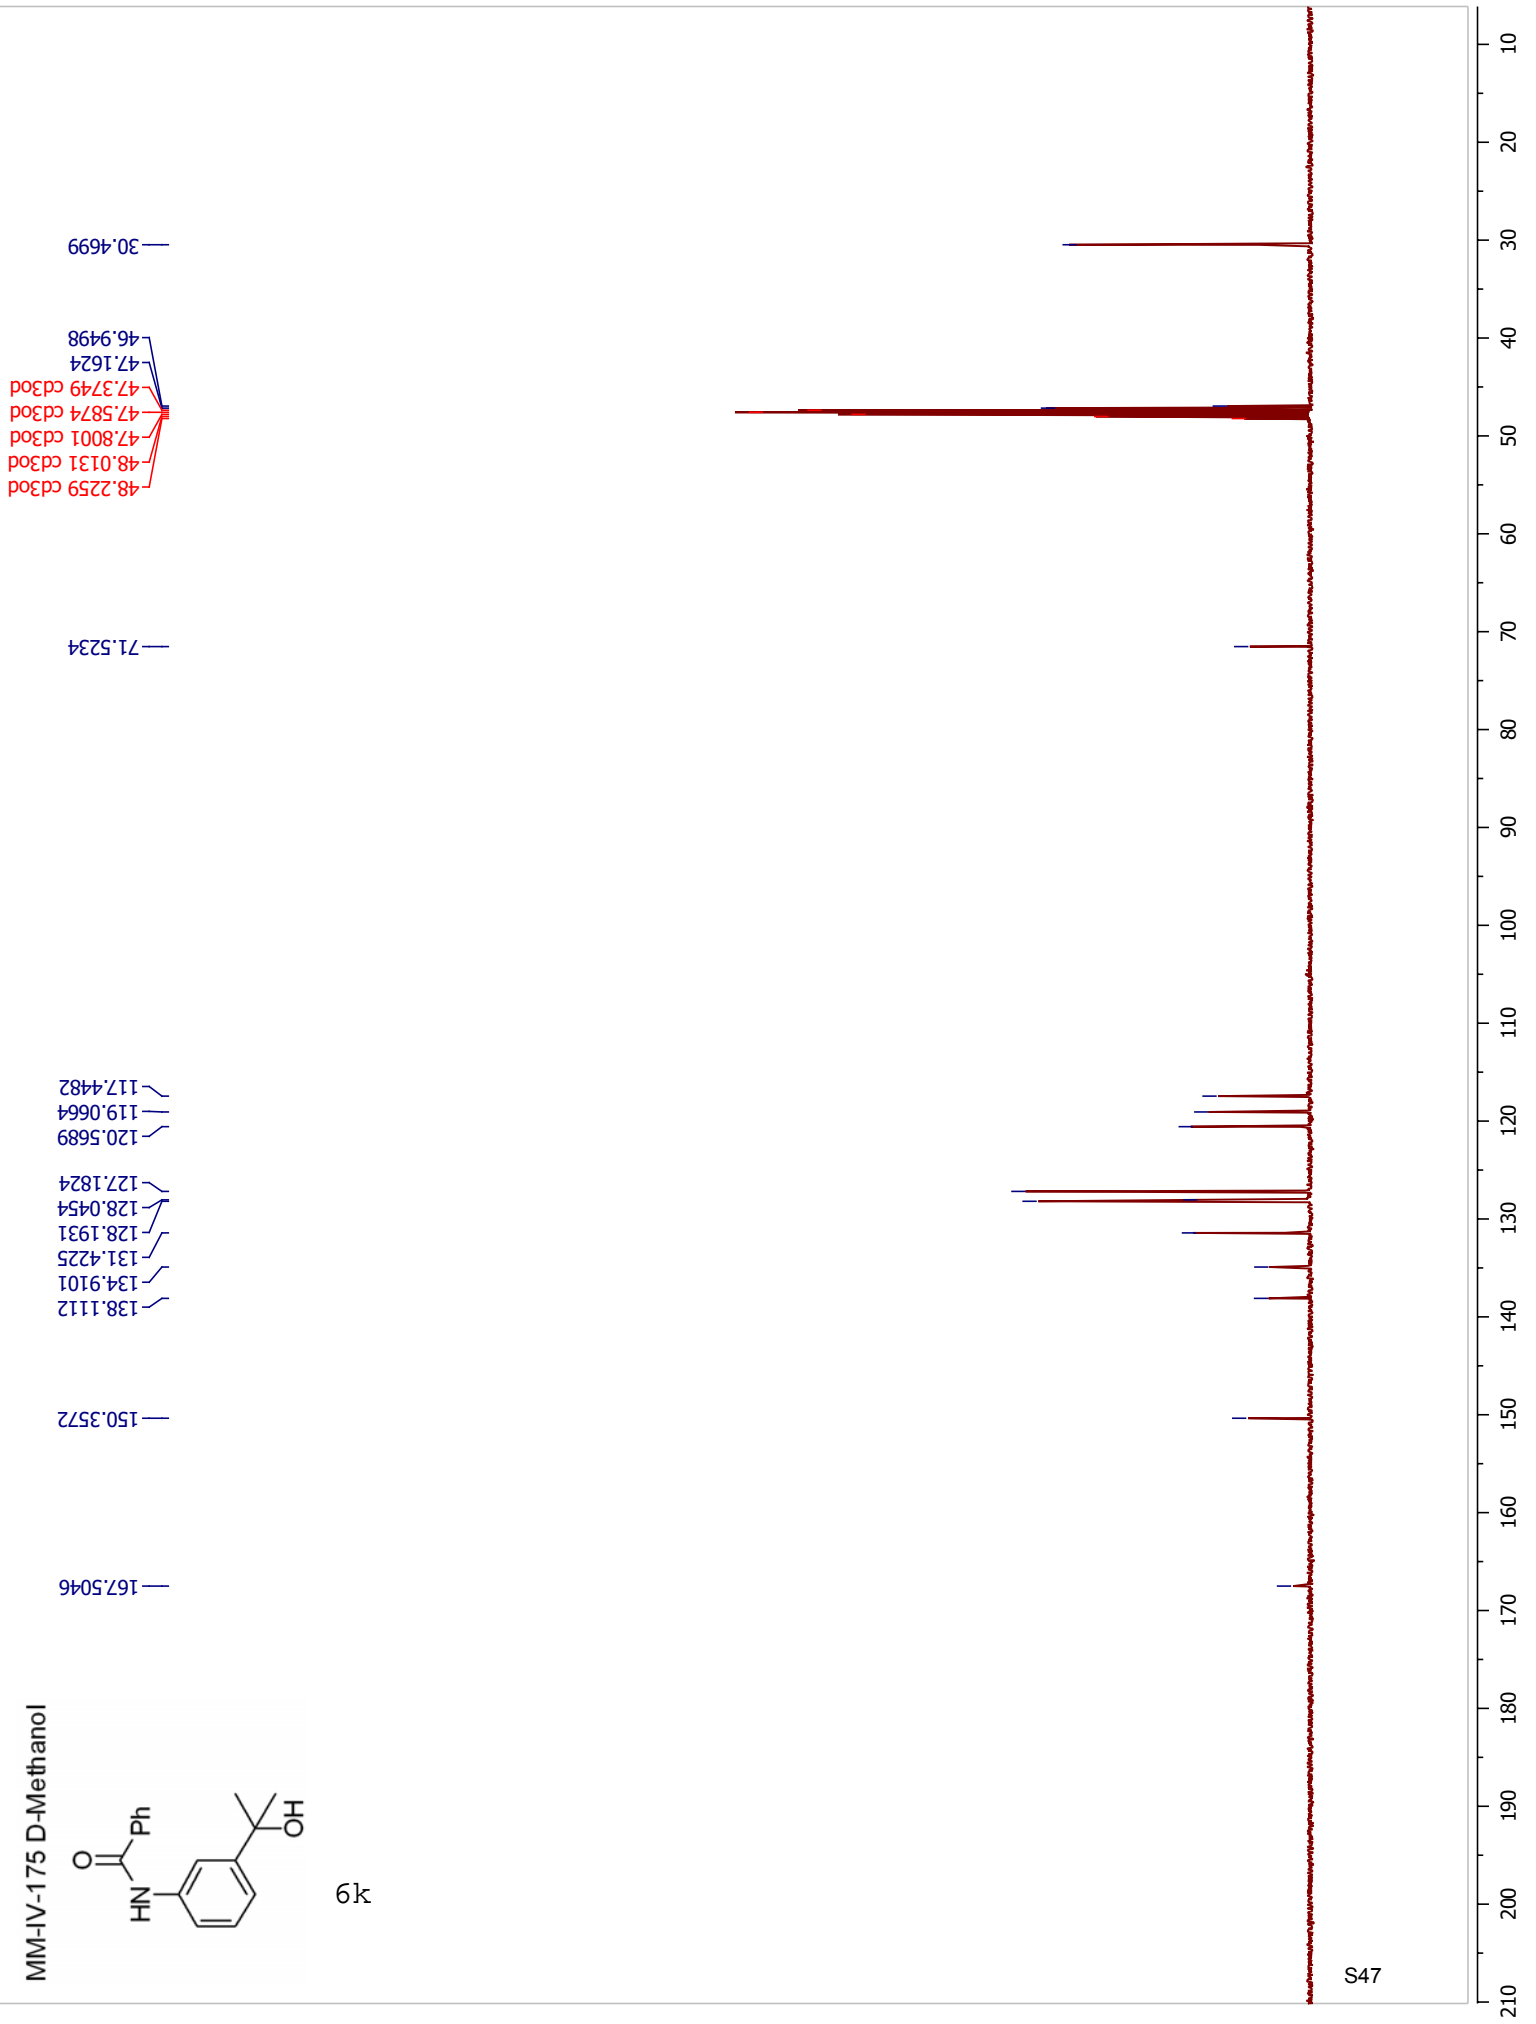

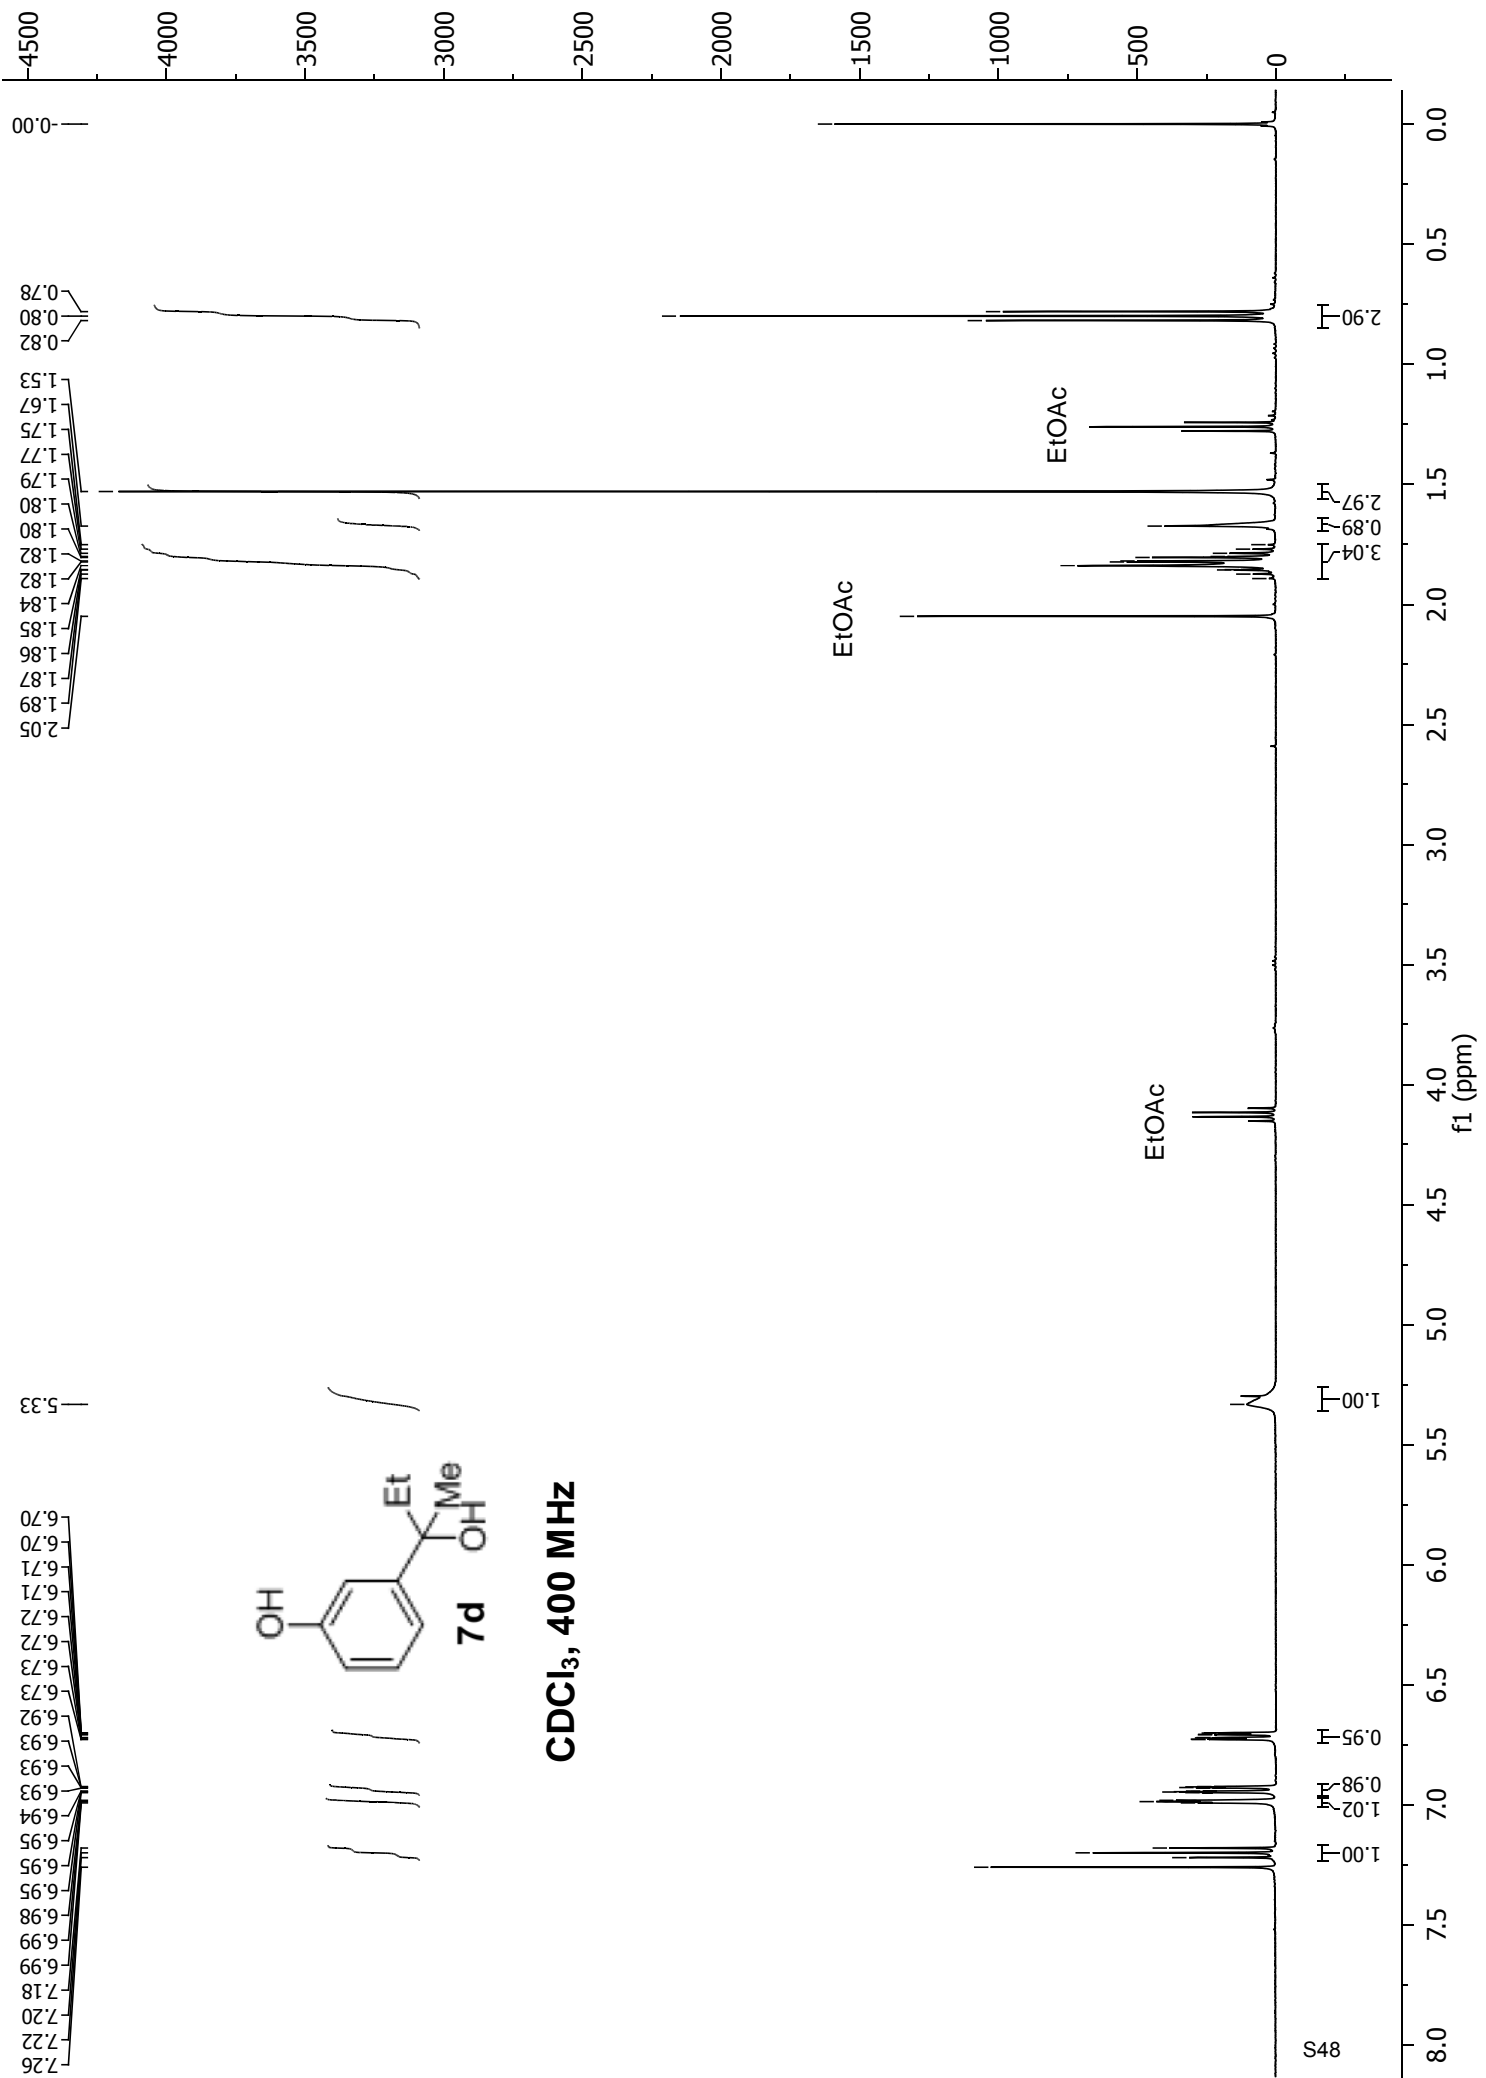



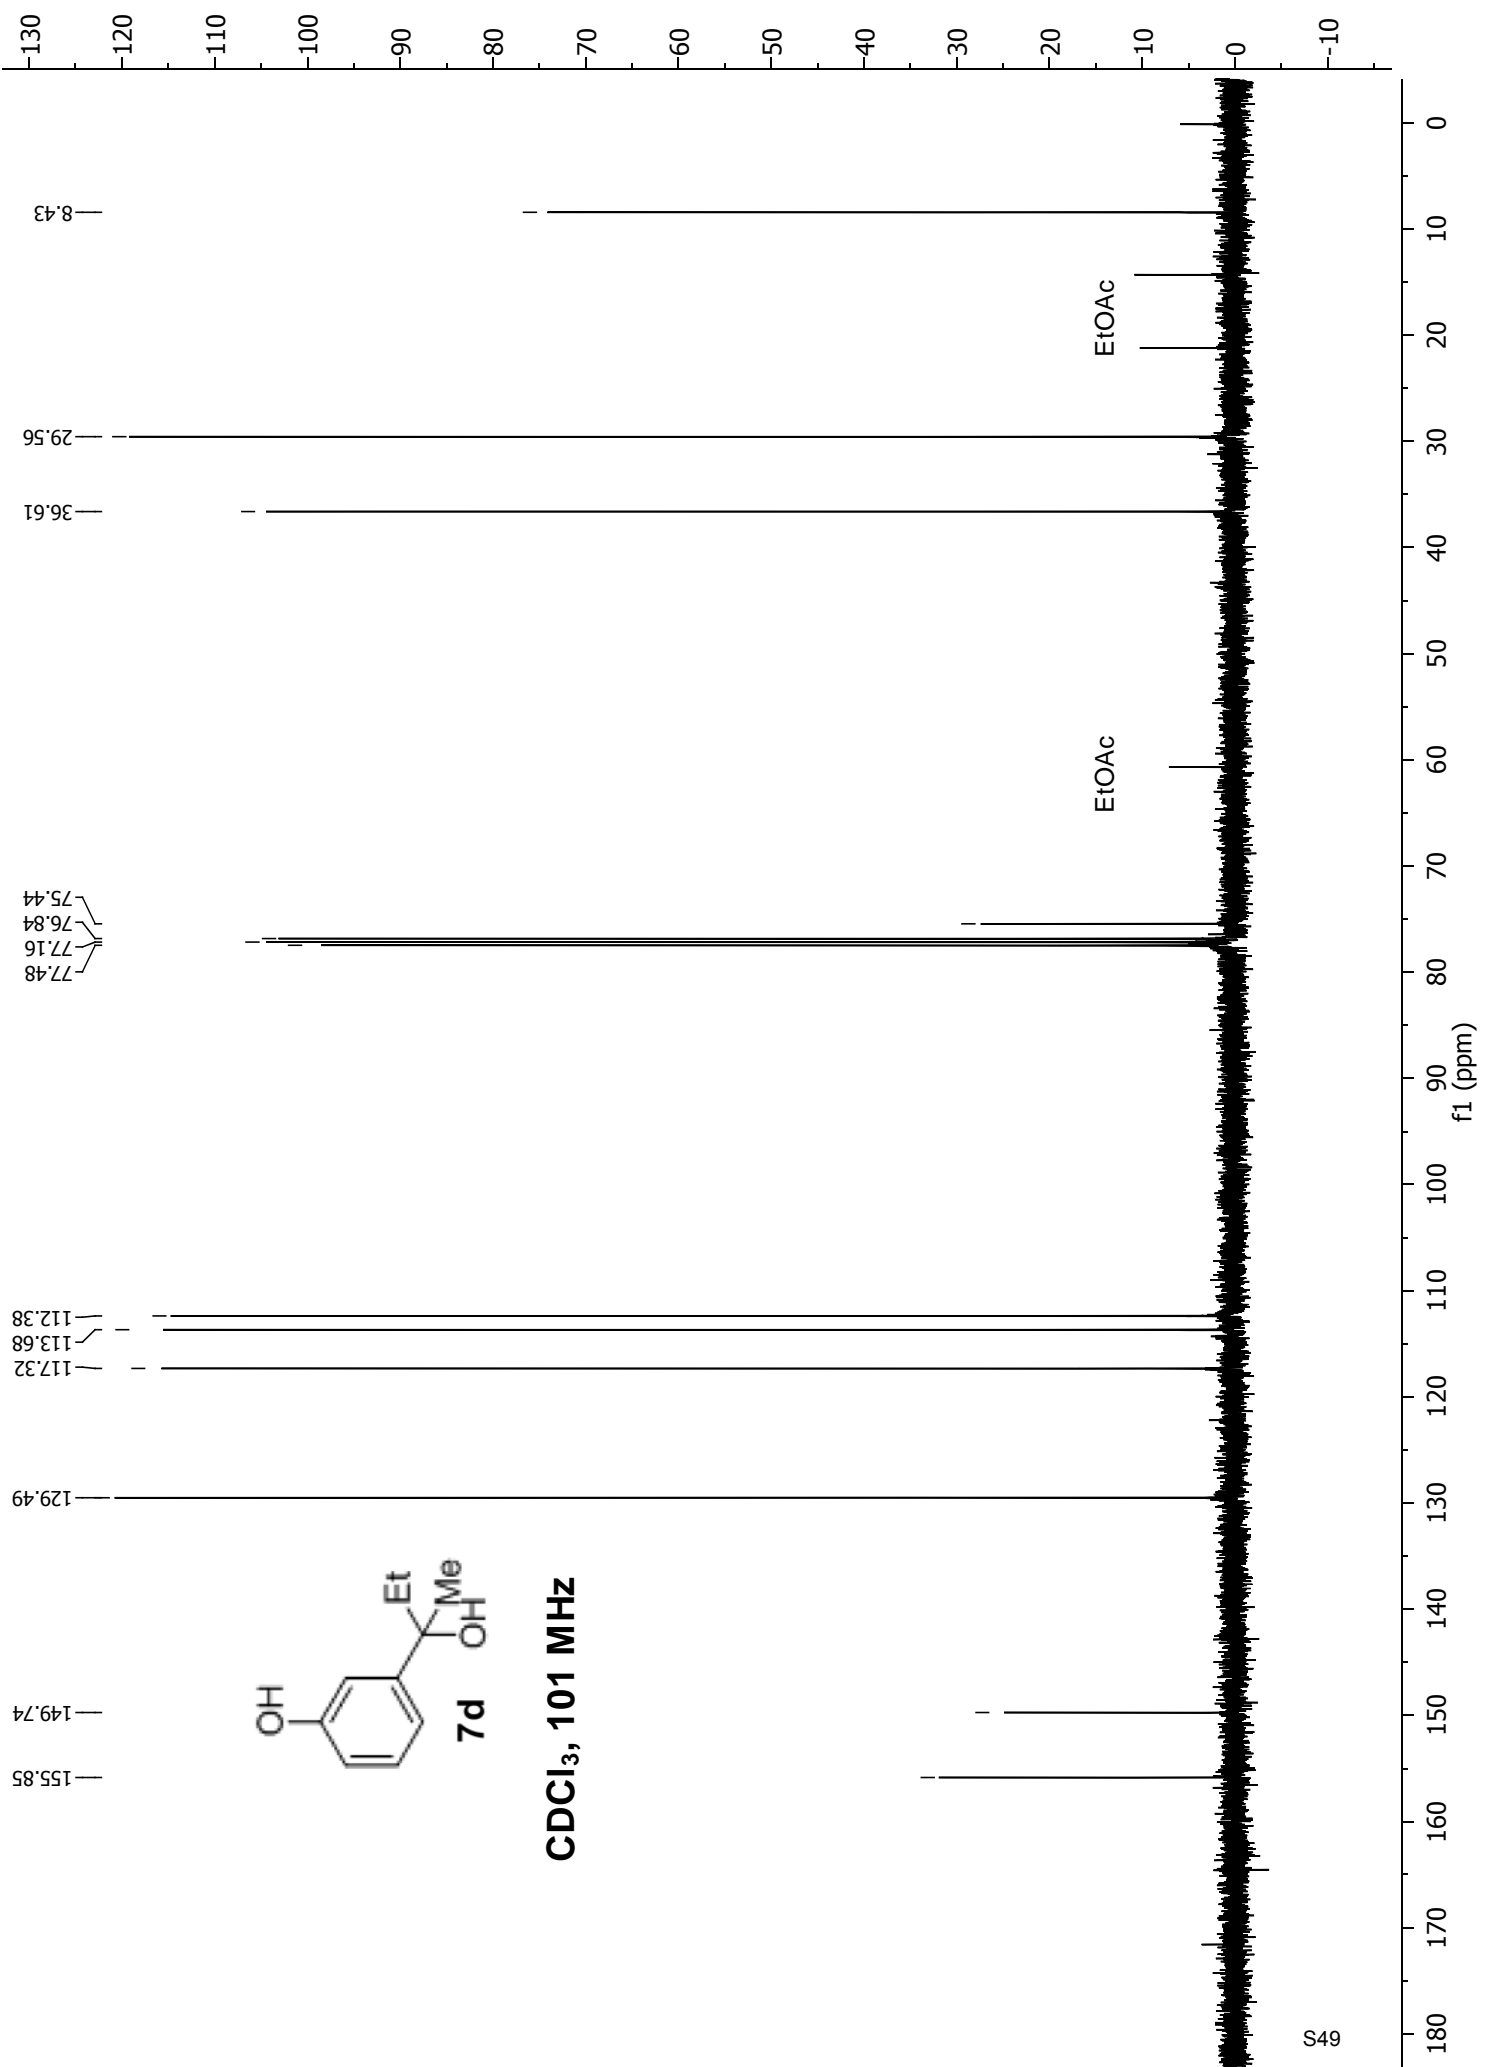

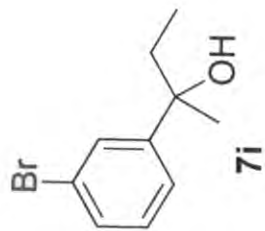

**CDCl<sub>3</sub>, 125 MHz**

1.9302  
 1.9266  
 1.9213  
 1.9025  
 1.8208  
 1.8063  
 1.7917  
 1.7774  
 1.7632  
 1.5054  
 0.7918  
 0.7769  
 0.7620

7.5922  
 7.5886  
 7.5852  
 7.3550  
 7.3519  
 7.3392  
 7.3375  
 7.3363  
 7.3257  
 7.3118  
 7.3099  
 7.1976  
 7.1818  
 7.1661

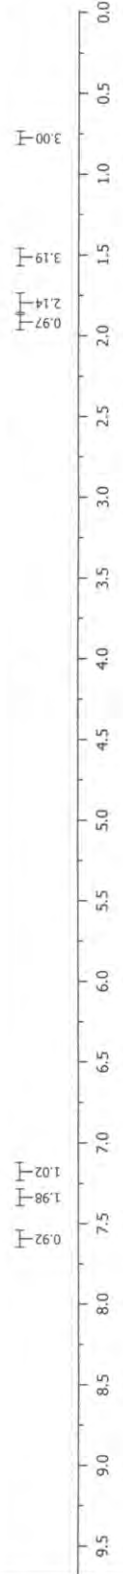

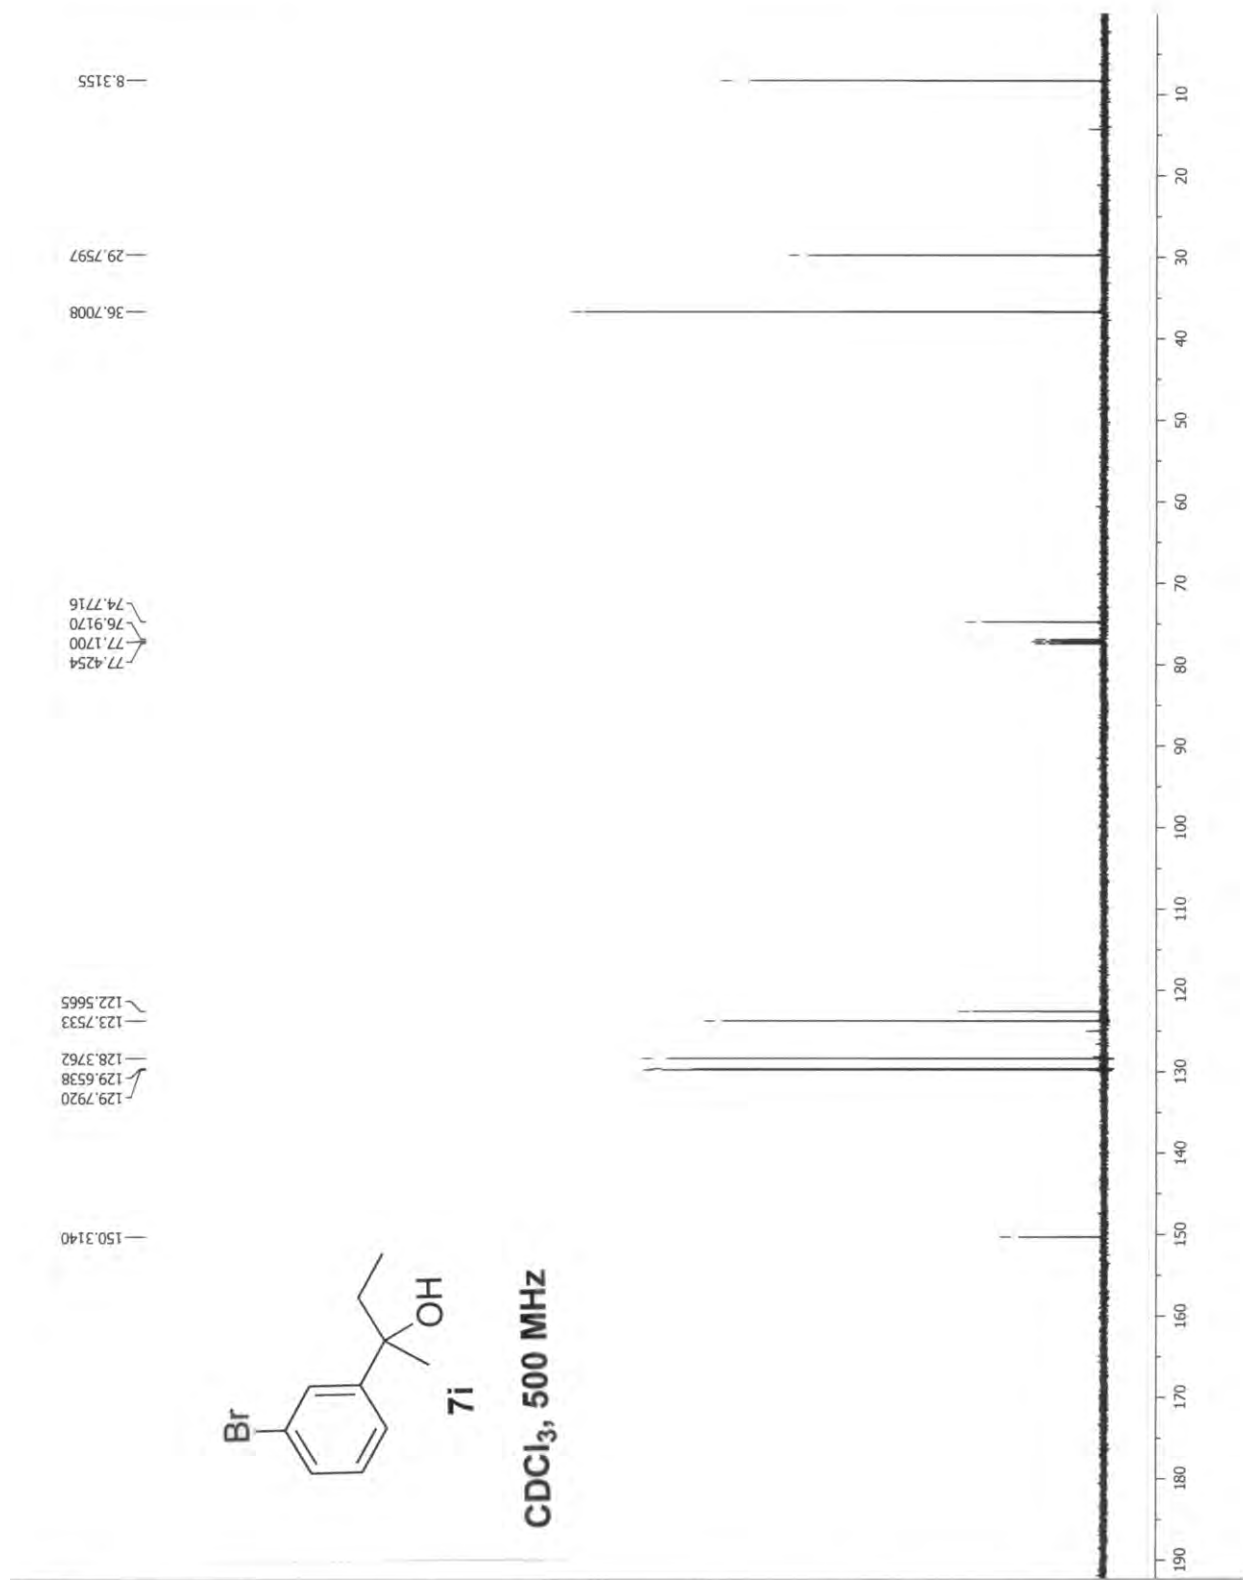

Supplement: NIHMS362742-supplement-1_si_001.pdf [file NIHMS362742-supplement-1_si_001.pdf]
