# Supplementary material
Source: PubMed Central journal article supplement (PMC3321128)

## Supporting Information (Part II) for the Article entitled

### Access to “Friedel-Crafts-restricted” *tert*-alkyl aromatics by activation/methylation of tertiary benzylic alcohols

Joshua A. Hartsel, Derek T. Craft, Qiao-Hong Chen, Ming Ma, and Paul R. Carlier\*

*Department of Chemistry, Virginia Tech, Blacksburg, Virginia 24061*

[pcarlier@vt.edu](mailto:pcarlier@vt.edu)

#### Table of Contents

| Item                                                                                                                    | Page |
|-------------------------------------------------------------------------------------------------------------------------|------|
| <sup>1</sup> H & <sup>13</sup> C NMR spectra of <b>8c</b>                                                               | S53  |
| <sup>1</sup> H & <sup>13</sup> C NMR spectra of <b>8d</b>                                                               | S55  |
| <sup>1</sup> H & <sup>13</sup> C NMR spectra of <b>8g</b>                                                               | S57  |
| <sup>1</sup> H & <sup>13</sup> C NMR spectra of <b>8h</b> (CDCl <sub>3</sub> and CD <sub>2</sub> Cl <sub>2</sub> )      | S59  |
| <sup>1</sup> H & <sup>13</sup> C NMR spectra of <b>13h</b> and <b>15h</b> (mixture in CD <sub>2</sub> Cl <sub>2</sub> ) | S63  |
| <sup>1</sup> H & <sup>13</sup> C NMR spectra of <b>14h</b>                                                              | S65  |
| <sup>1</sup> H & <sup>13</sup> C NMR spectra of <b>14i</b>                                                              | S67  |
| <sup>1</sup> H & <sup>13</sup> C NMR spectra of <b>15h</b>                                                              | S69  |
| <sup>1</sup> H & <sup>13</sup> C NMR spectra of <b>16b</b> (Method B and A)                                             | S71  |
| <sup>1</sup> H & <sup>13</sup> C NMR spectra of <b>19h</b> (in CD <sub>2</sub> Cl <sub>2</sub> )                        | S74  |
| <sup>1</sup> H & <sup>13</sup> C NMR spectra of mixture of <b>21b</b> and <b>22b</b>                                    | S76  |
| <sup>1</sup> H & <sup>13</sup> C NMR spectra of mixture of <b>23c</b> and <b>24c</b>                                    | S78  |
| <sup>1</sup> H & <sup>13</sup> C NMR spectra of <b>24c</b>                                                              | S80  |
| <sup>1</sup> H & <sup>13</sup> C NMR spectra of <b>26</b>                                                               | S82  |

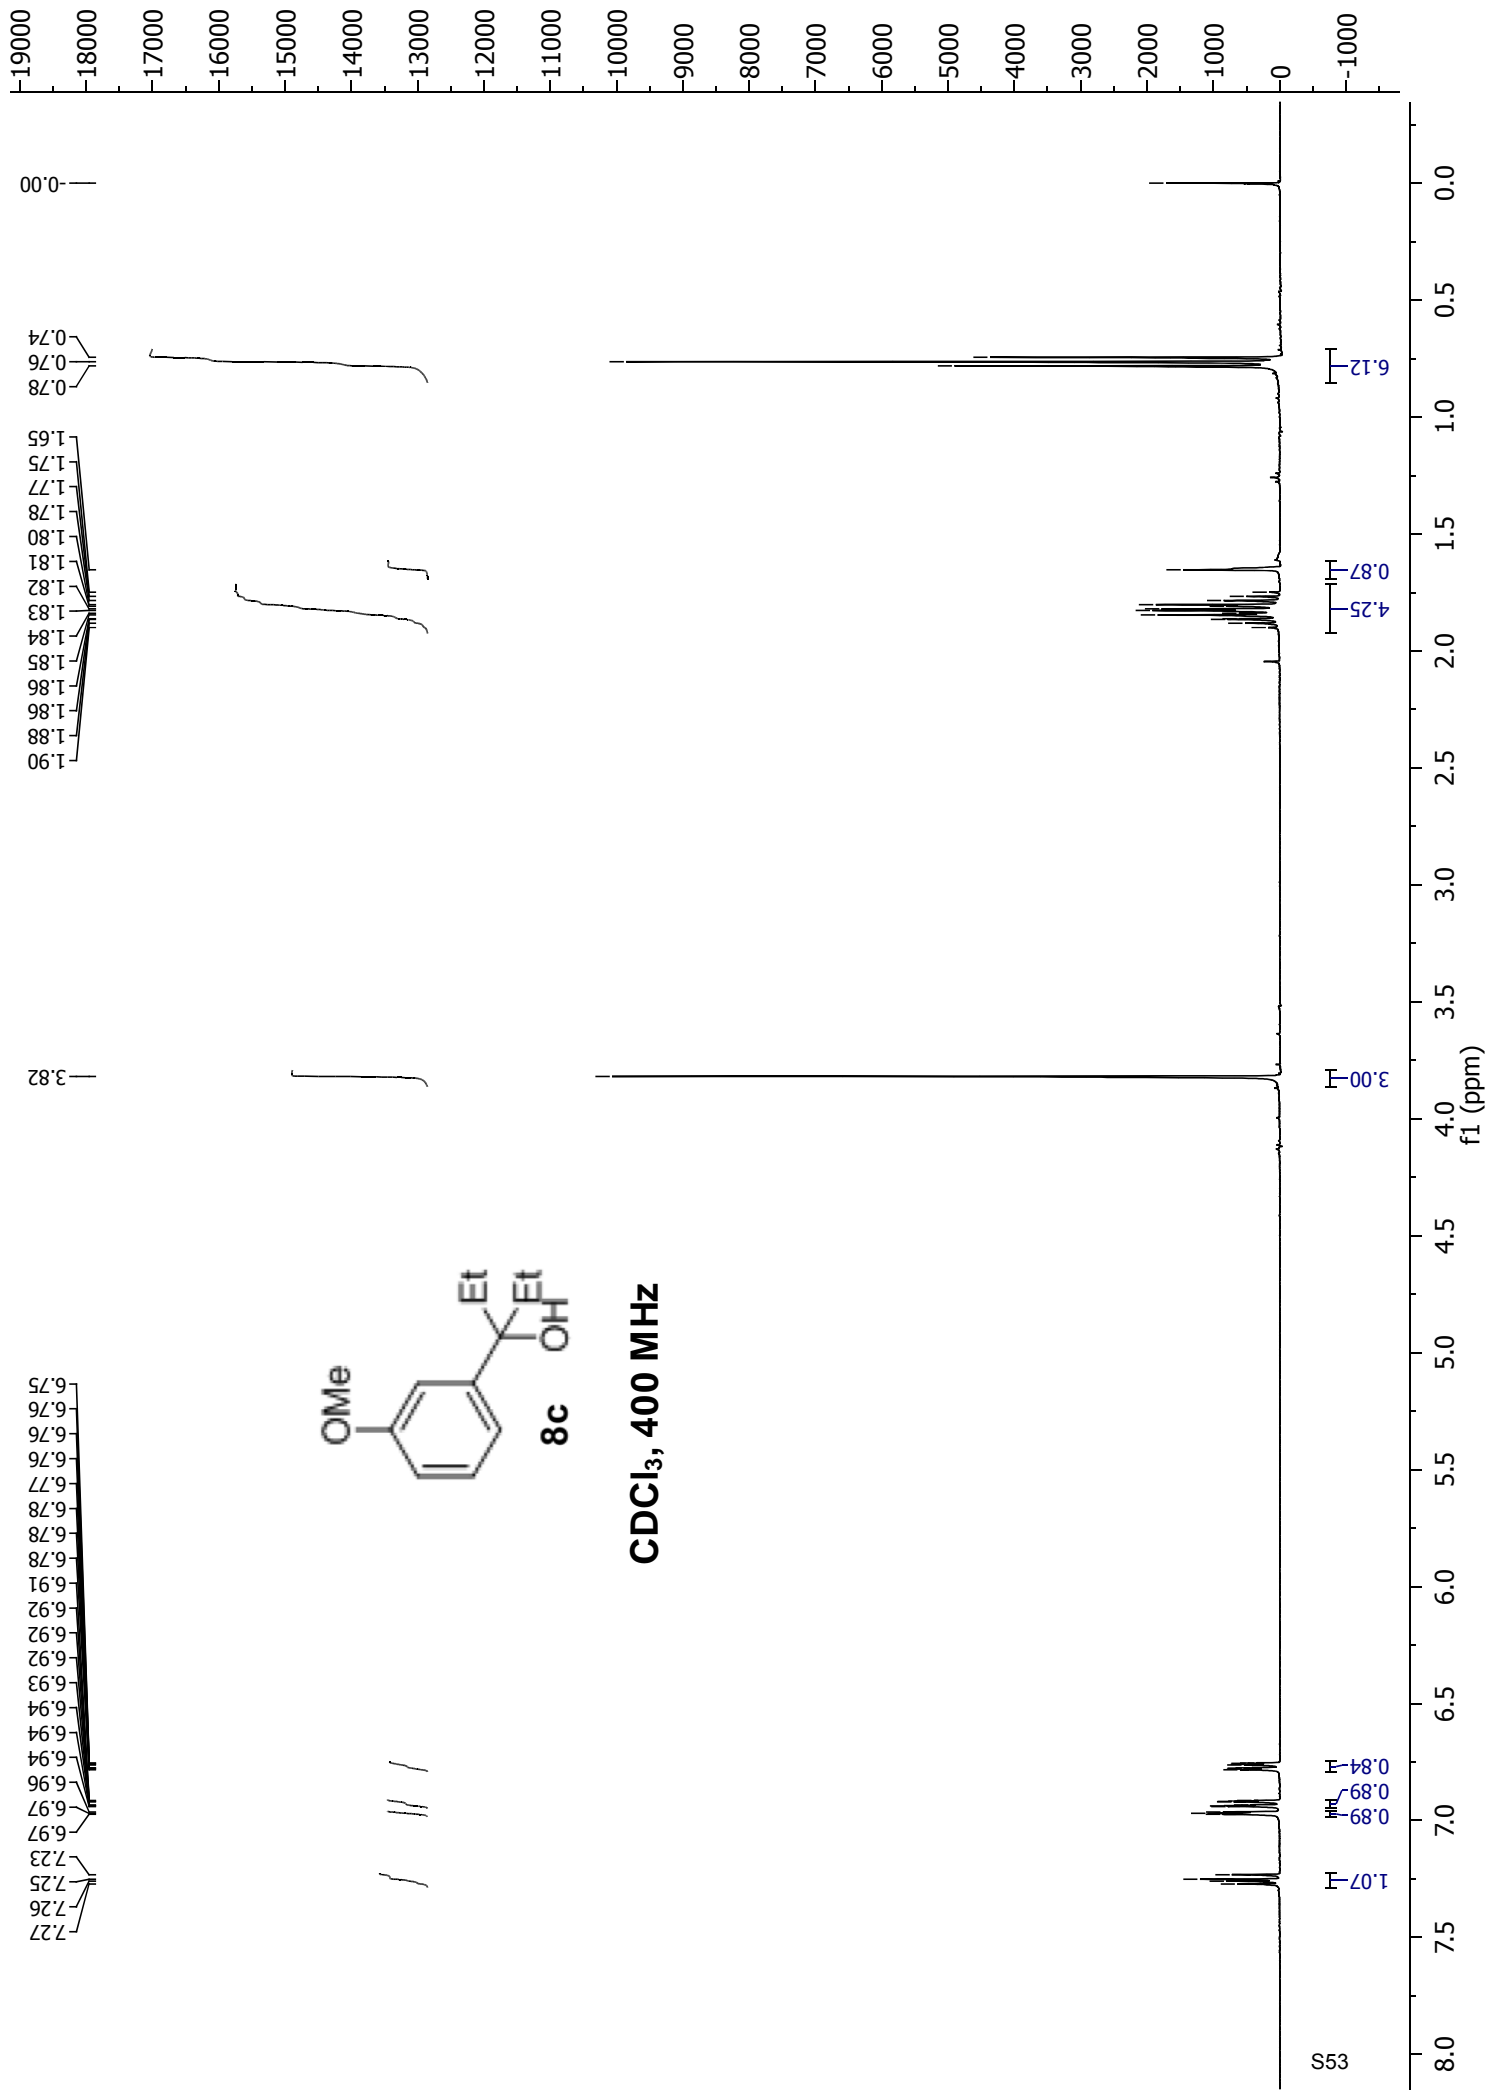

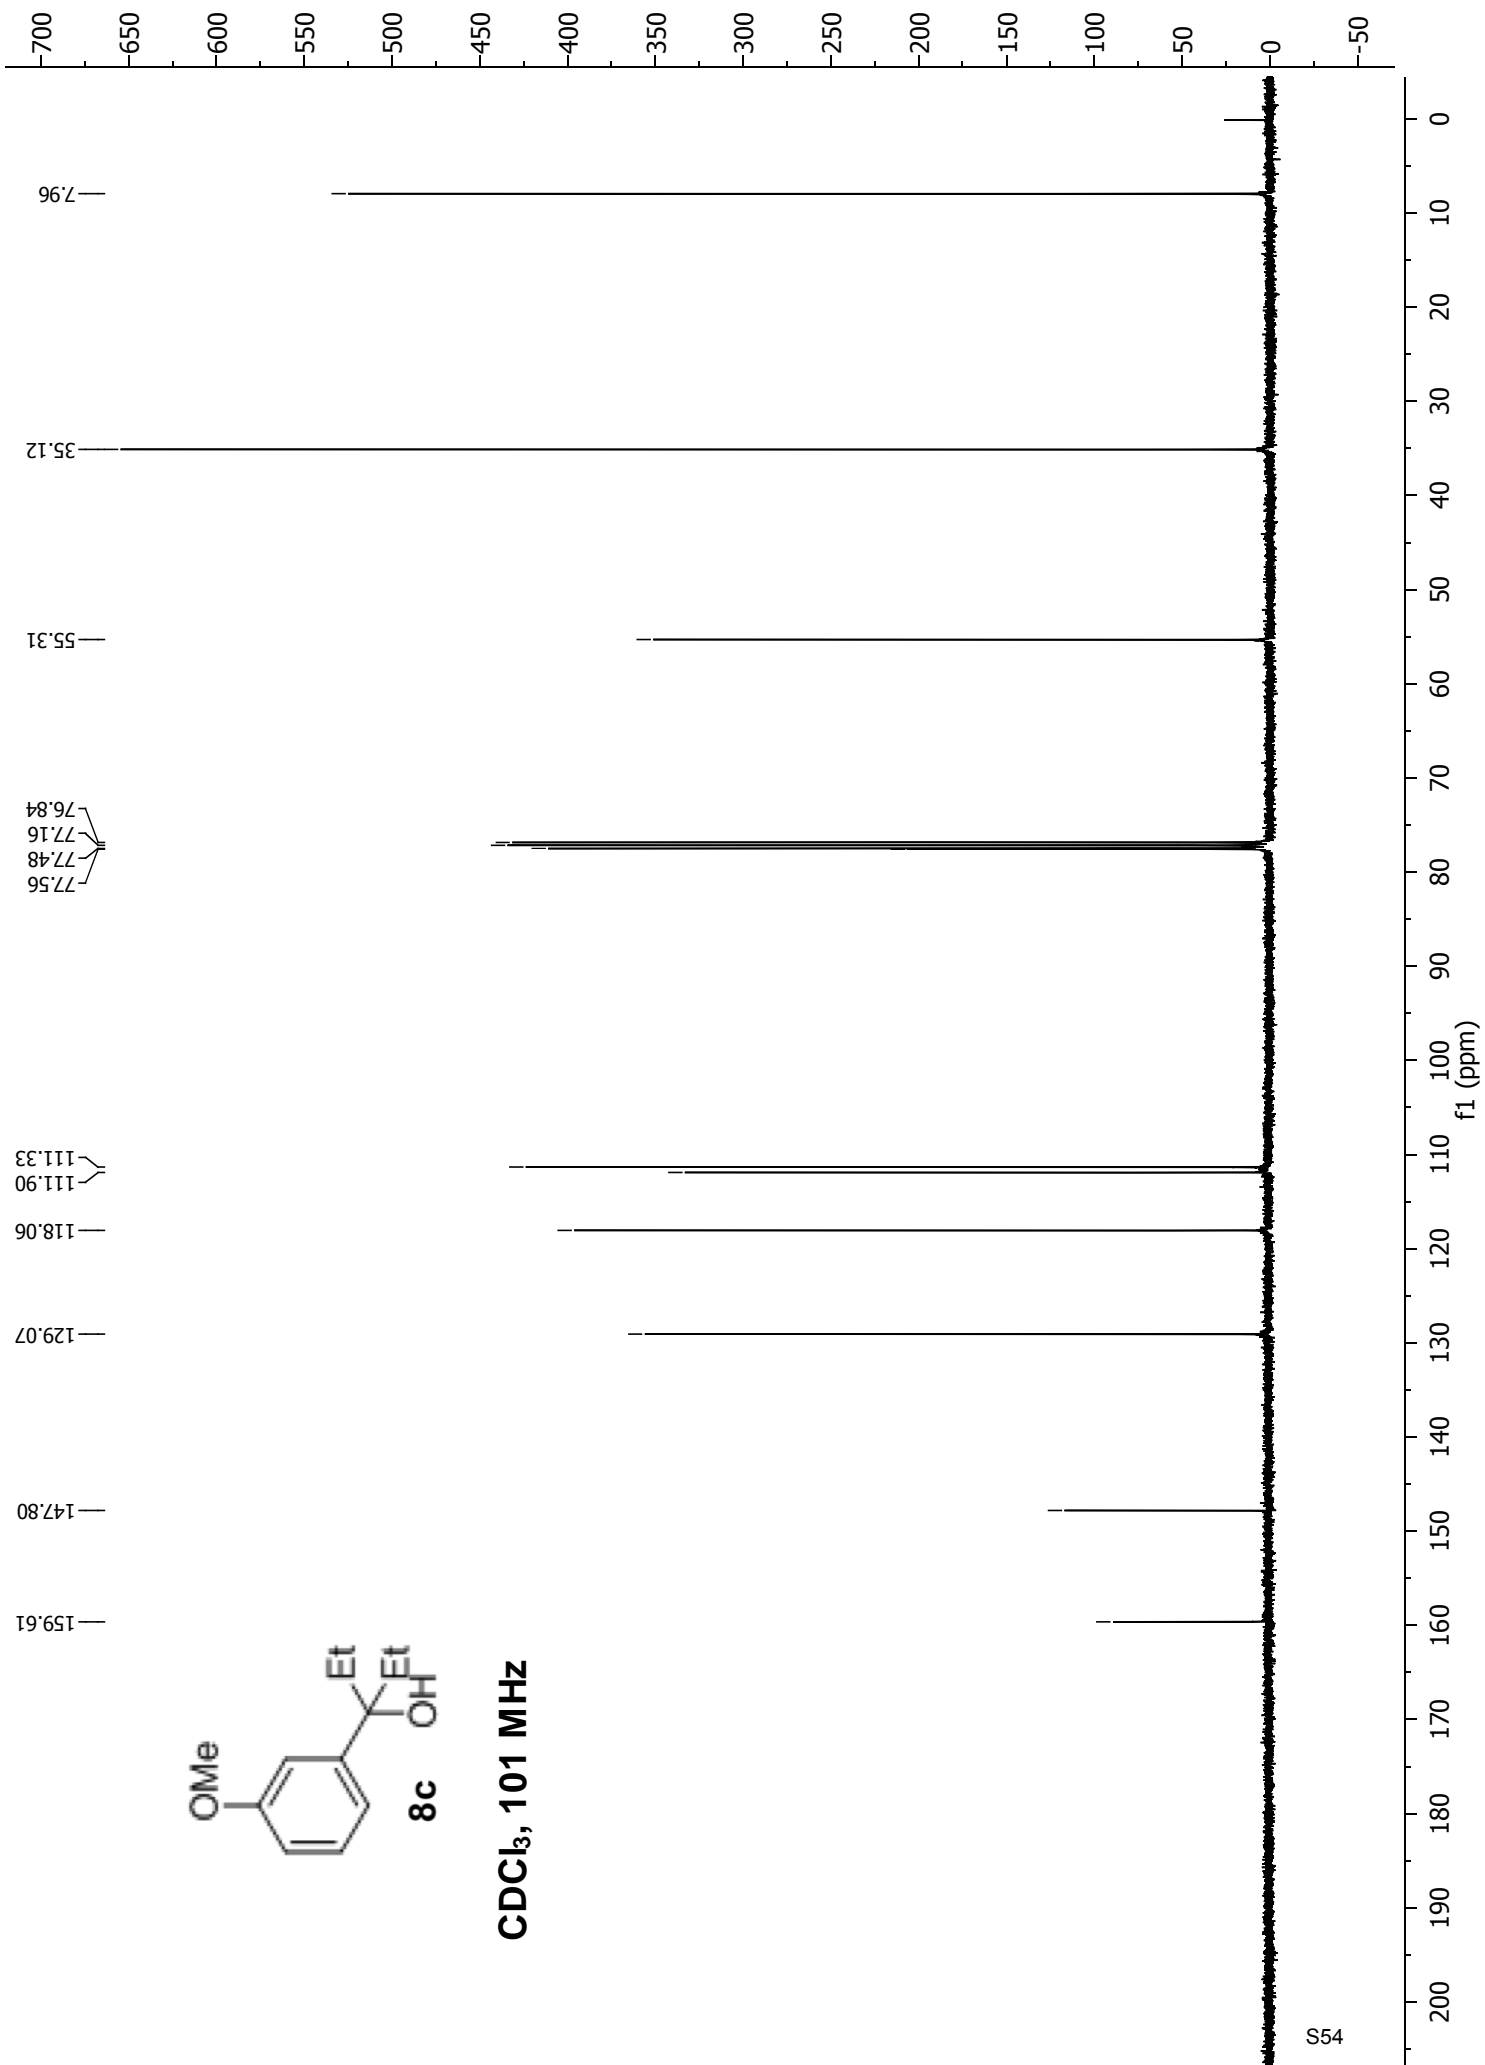

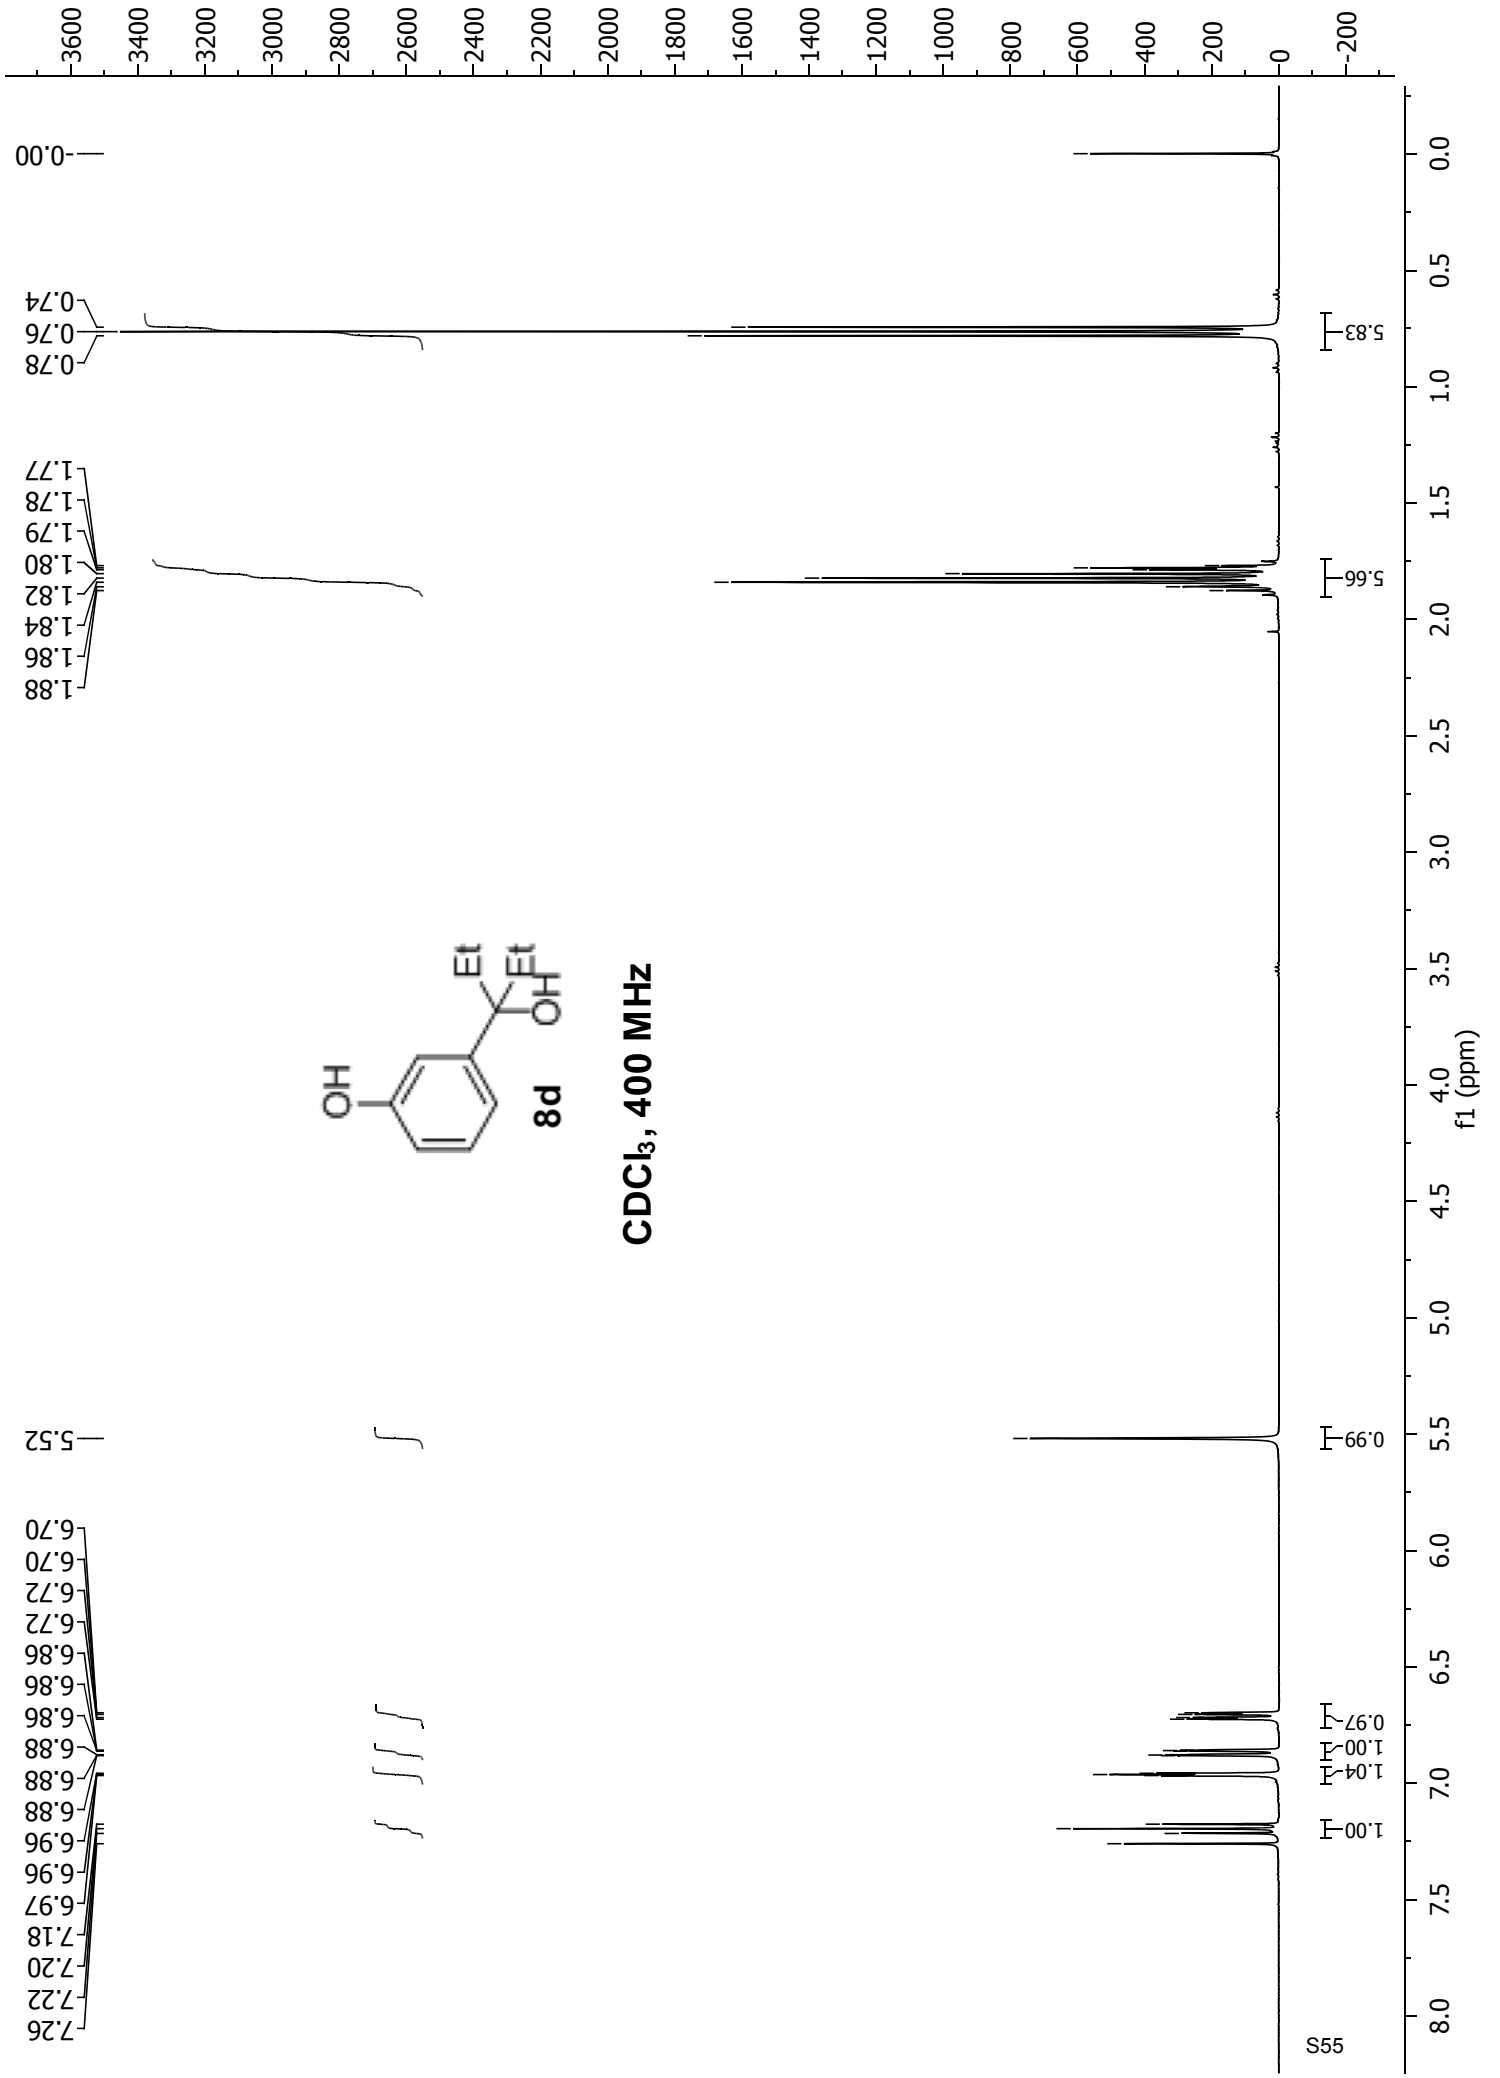

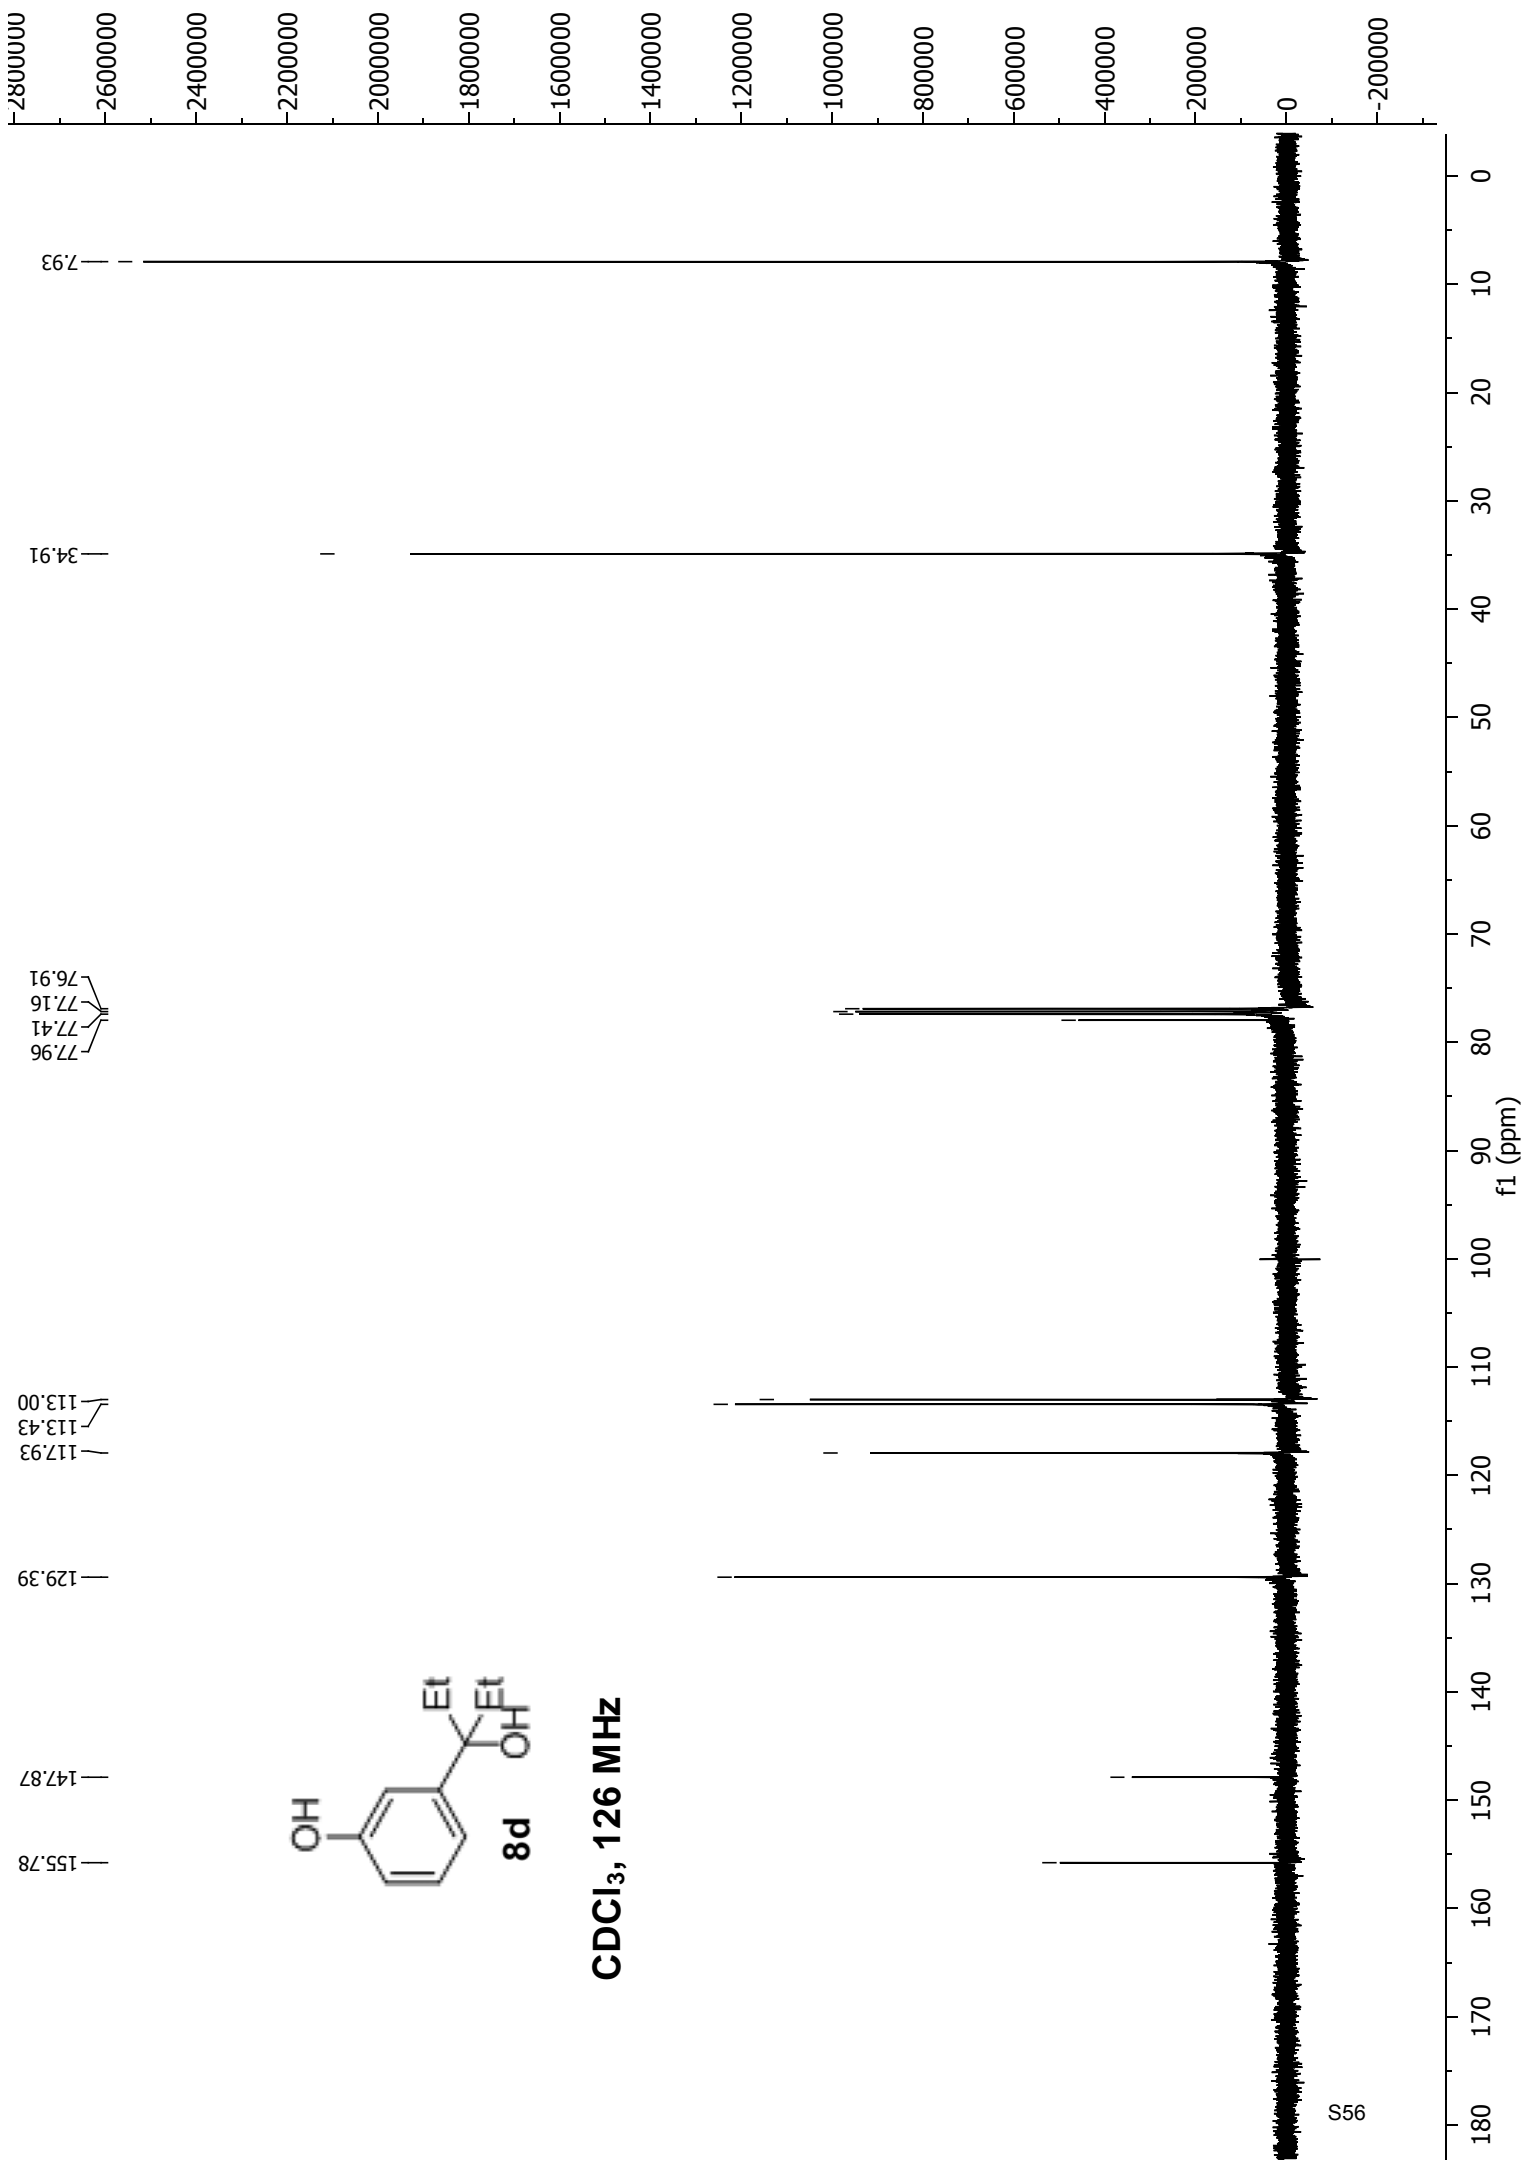

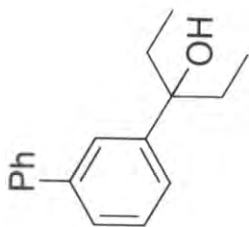

8g

CDCl<sub>3</sub>, 500 MHz

0.9310  
0.9164  
0.9014

1.9314  
1.9451  
1.9595  
1.9741  
1.9788  
1.9892  
1.9944  
2.0090  
2.0231  
2.0375  
2.1493

7.4095  
7.4113  
7.4251  
7.4390  
7.4407  
7.4532  
7.4565  
7.4678  
7.4686  
7.4768  
7.4914  
7.5086  
7.5249  
7.5402  
7.5624  
7.7249  
7.7398  
7.7411  
7.7771

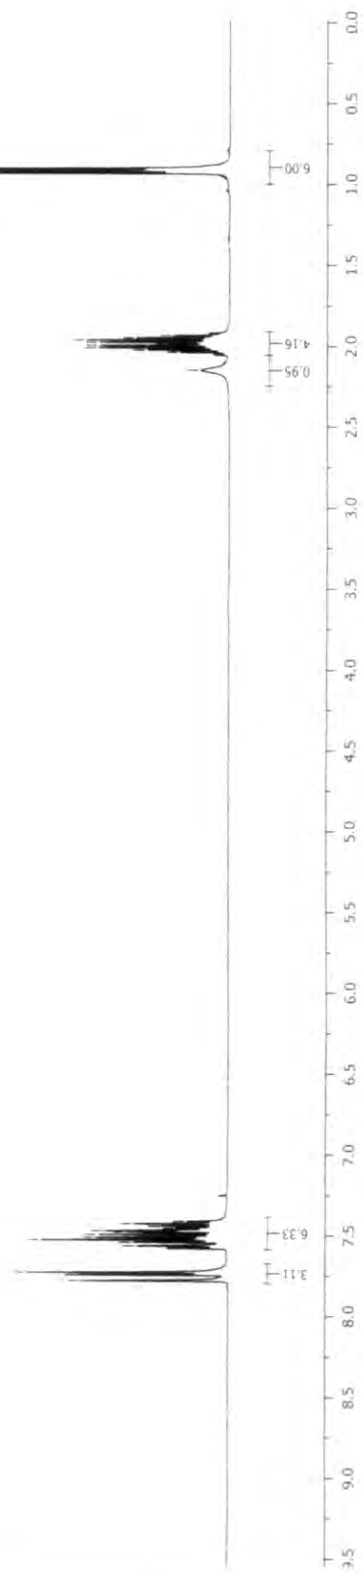

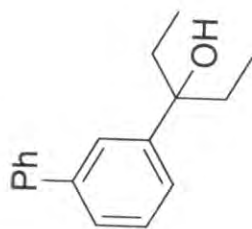

8g

CDCI<sub>3</sub>, 125 MHz

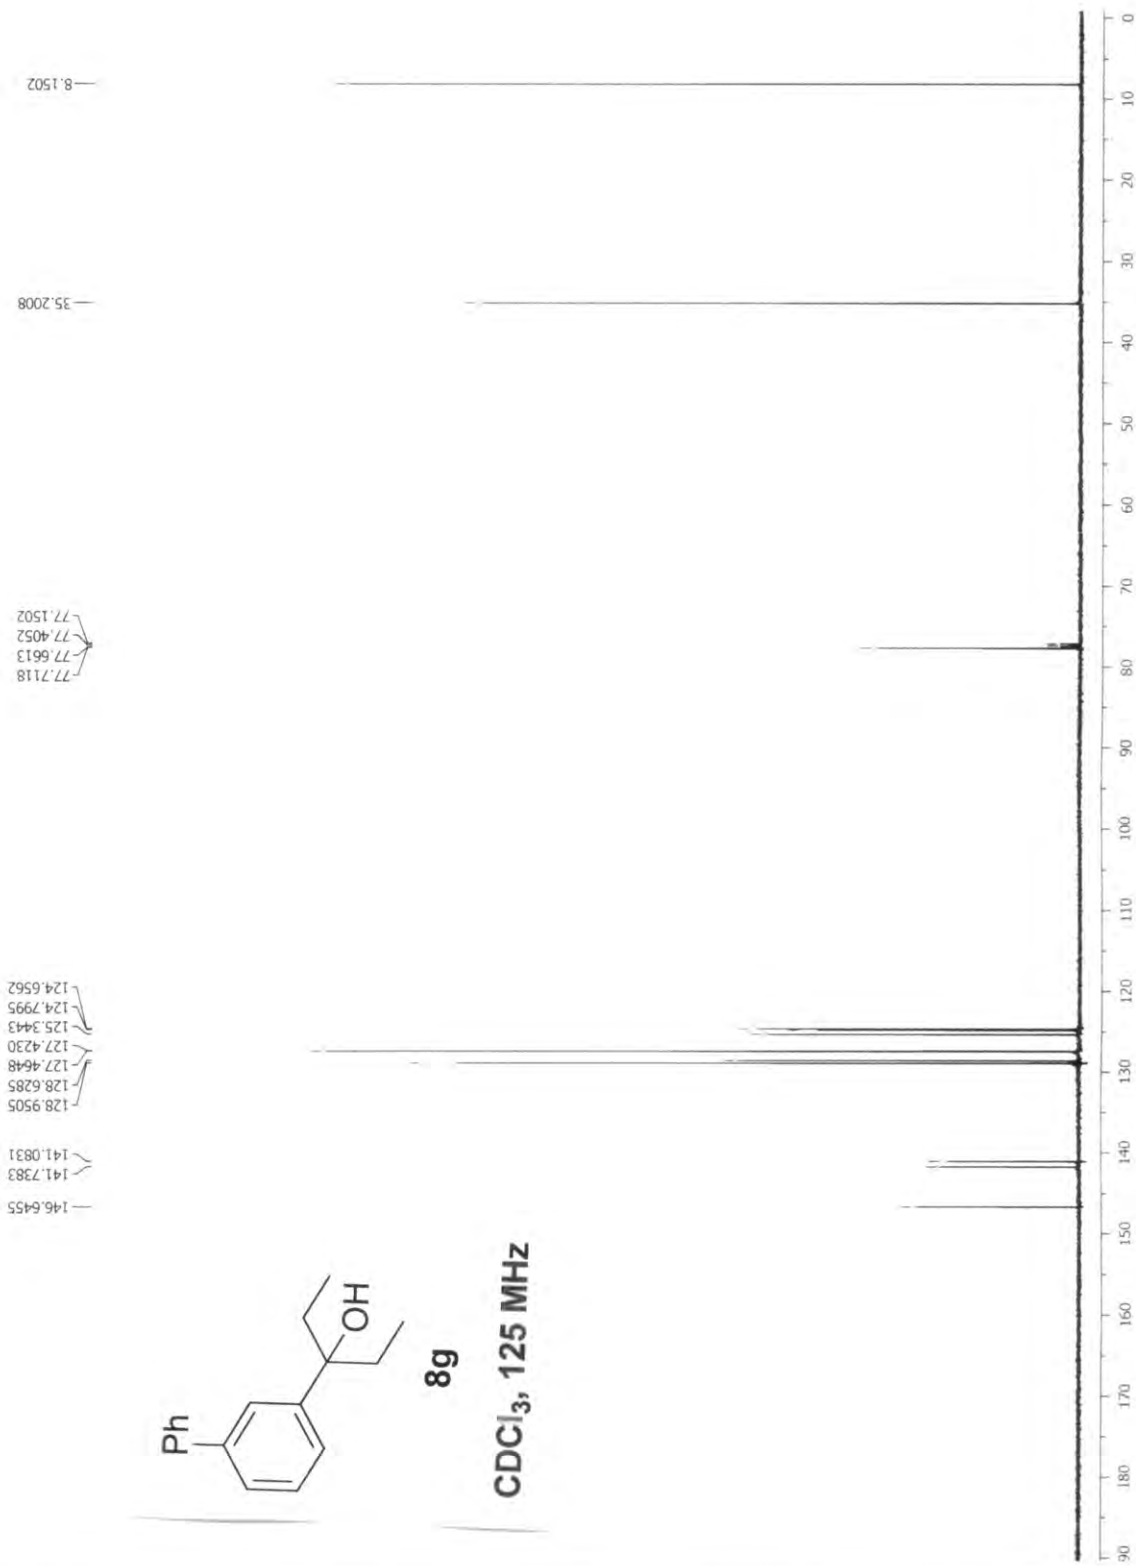

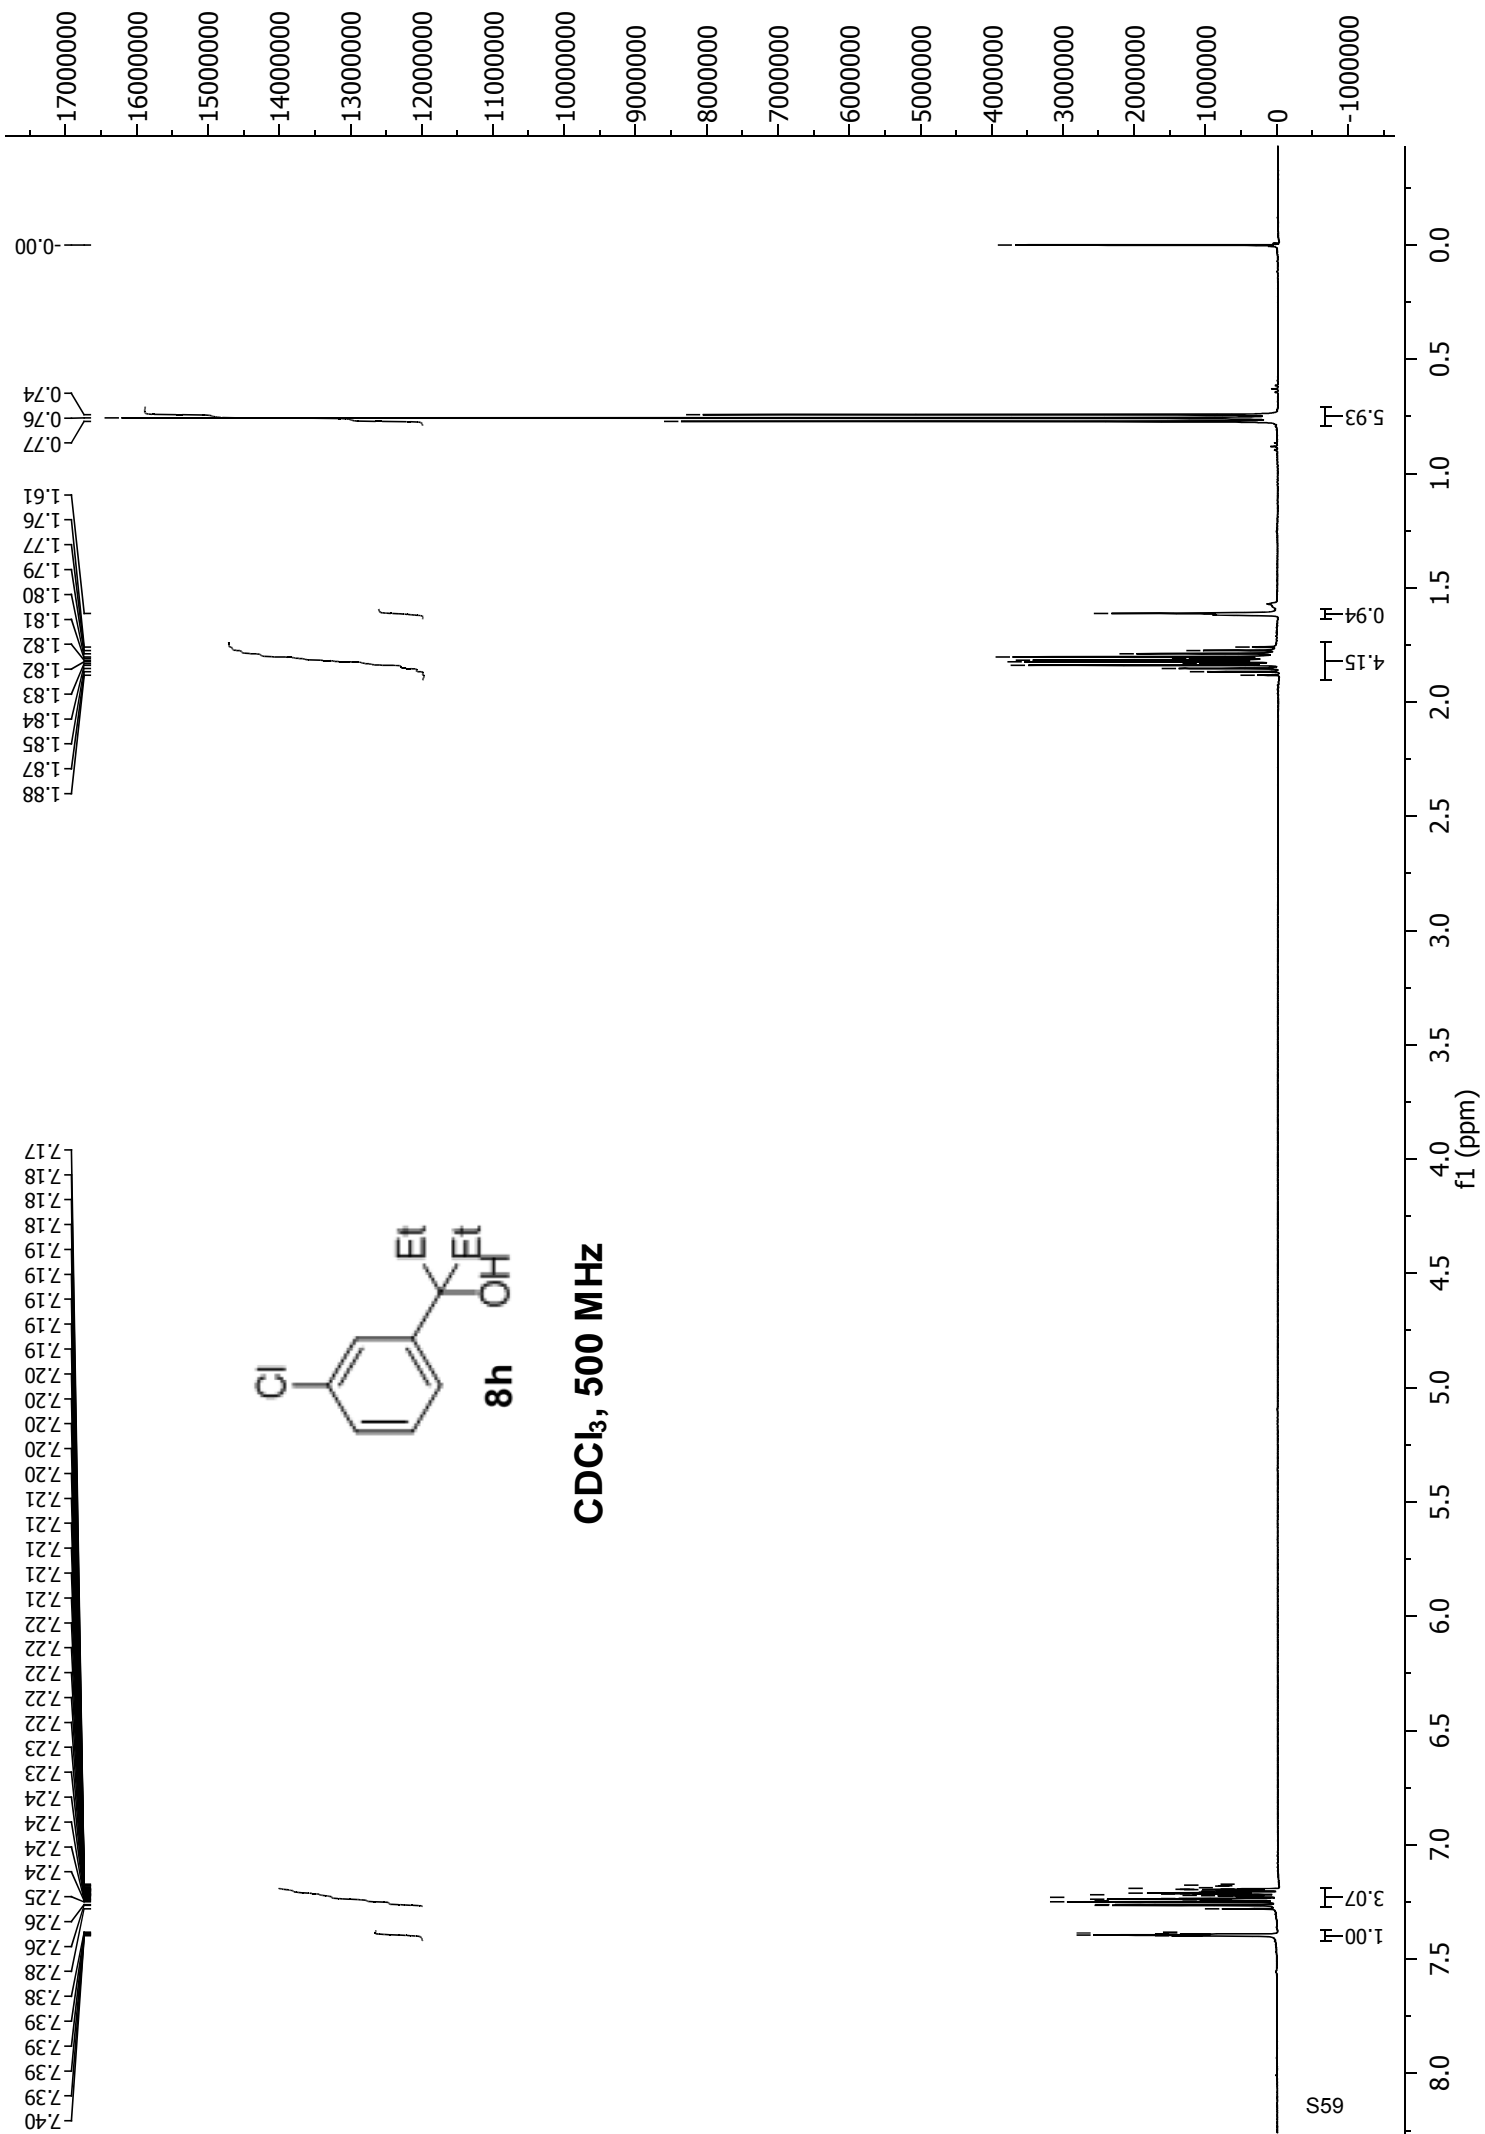



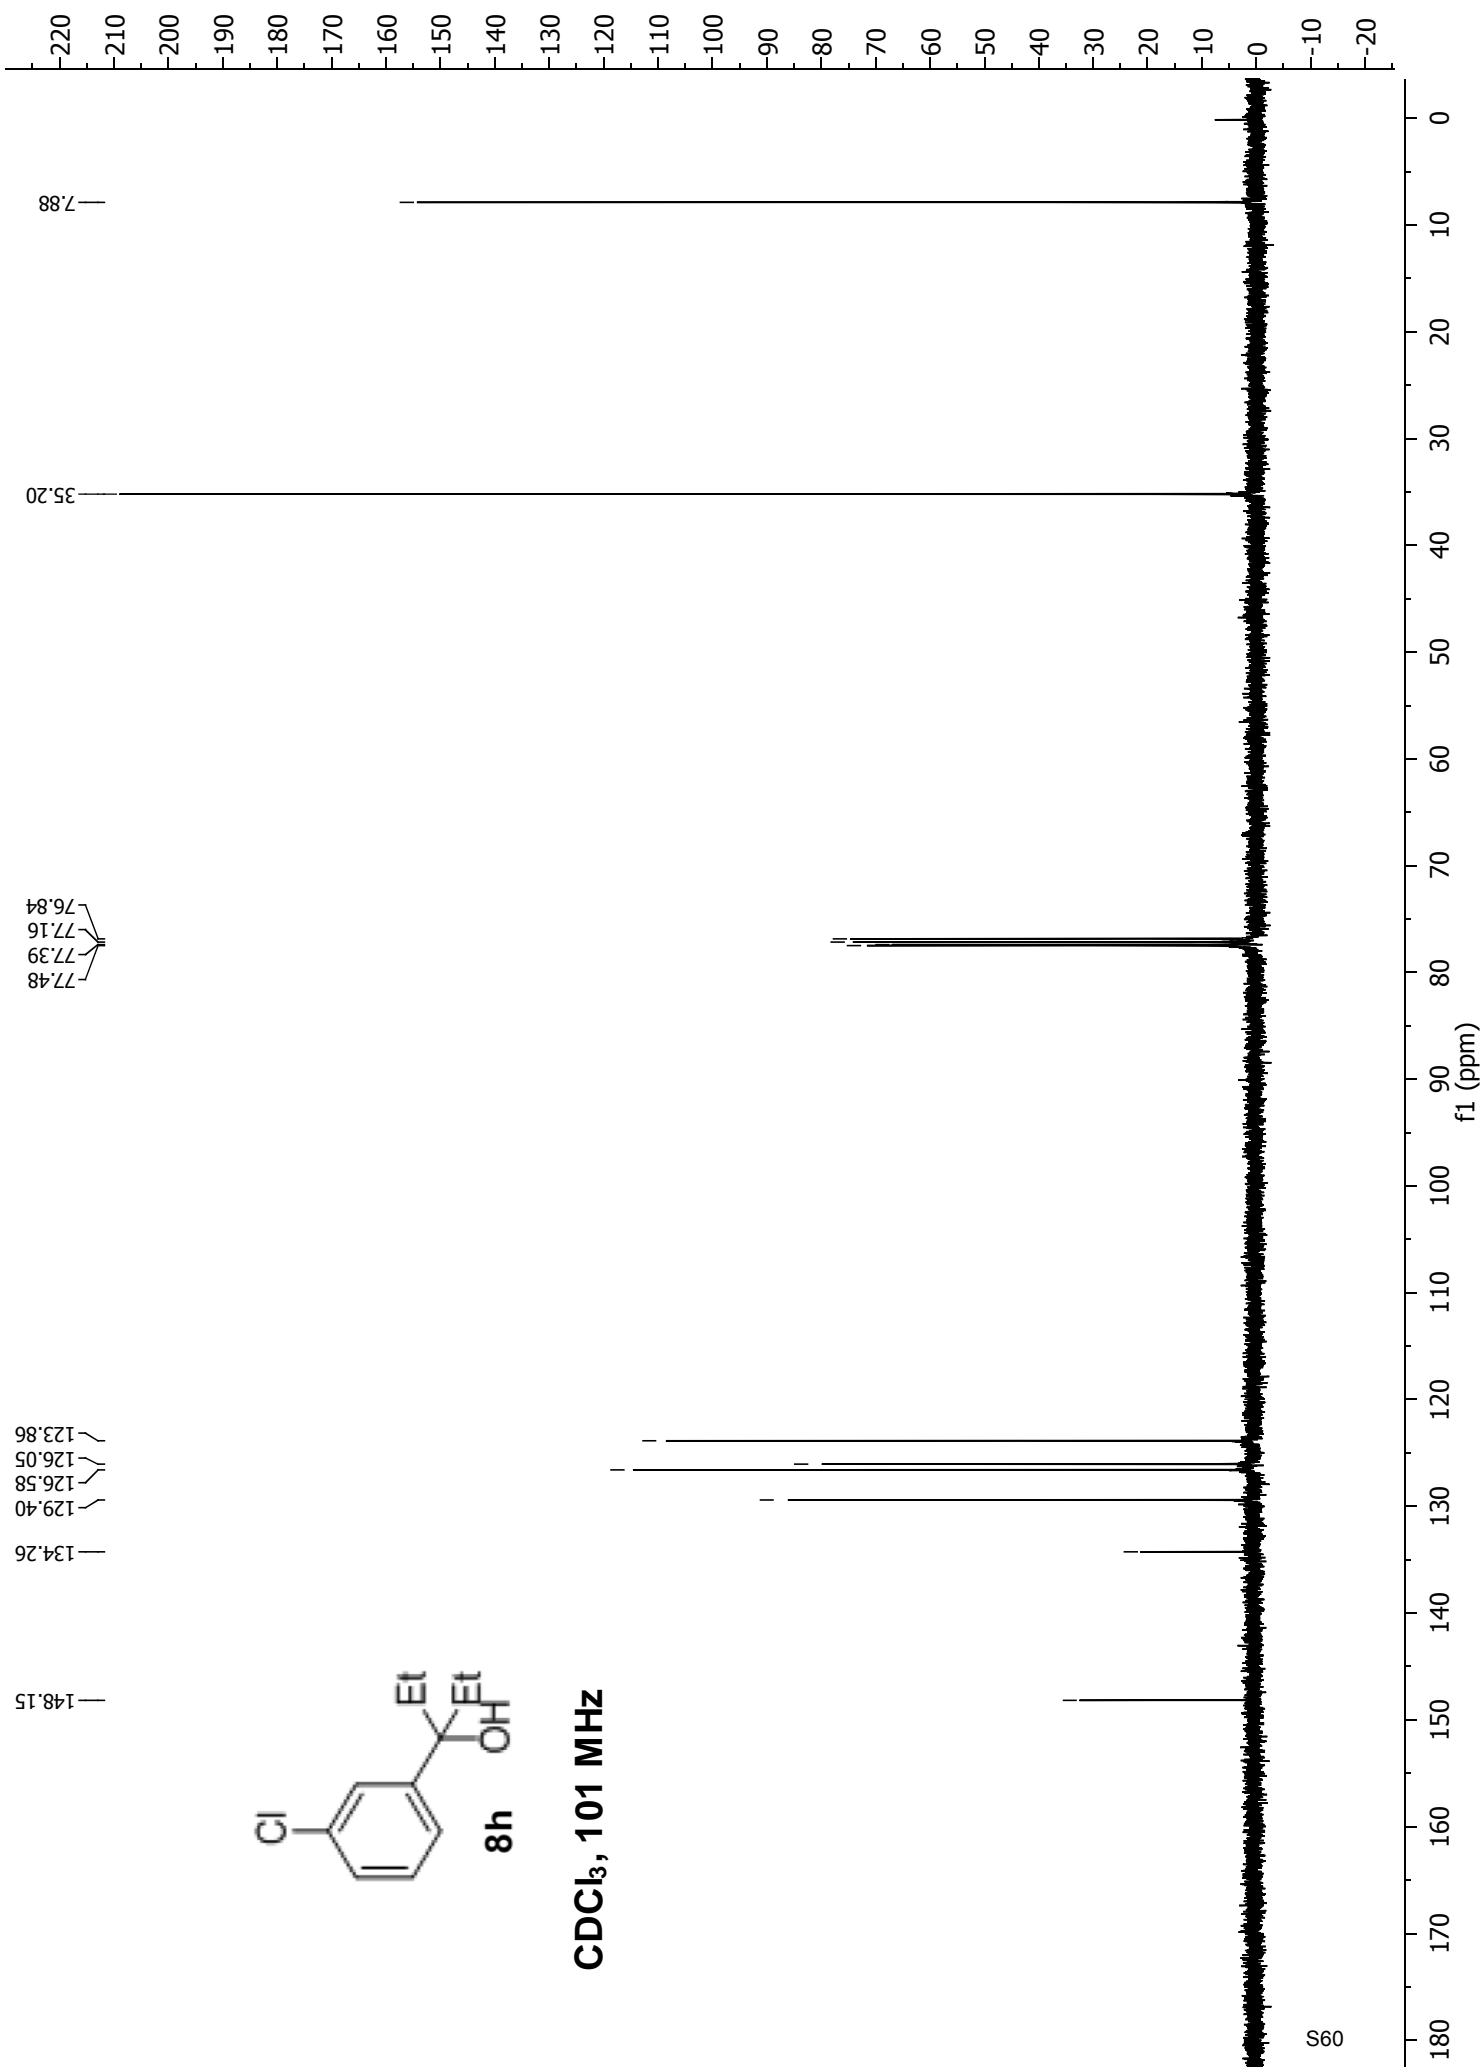

QHC-III-29-1\_20111004

PROTONRO CD2Cl2 /opt/topspin3.0/icon-data carrier-1 1

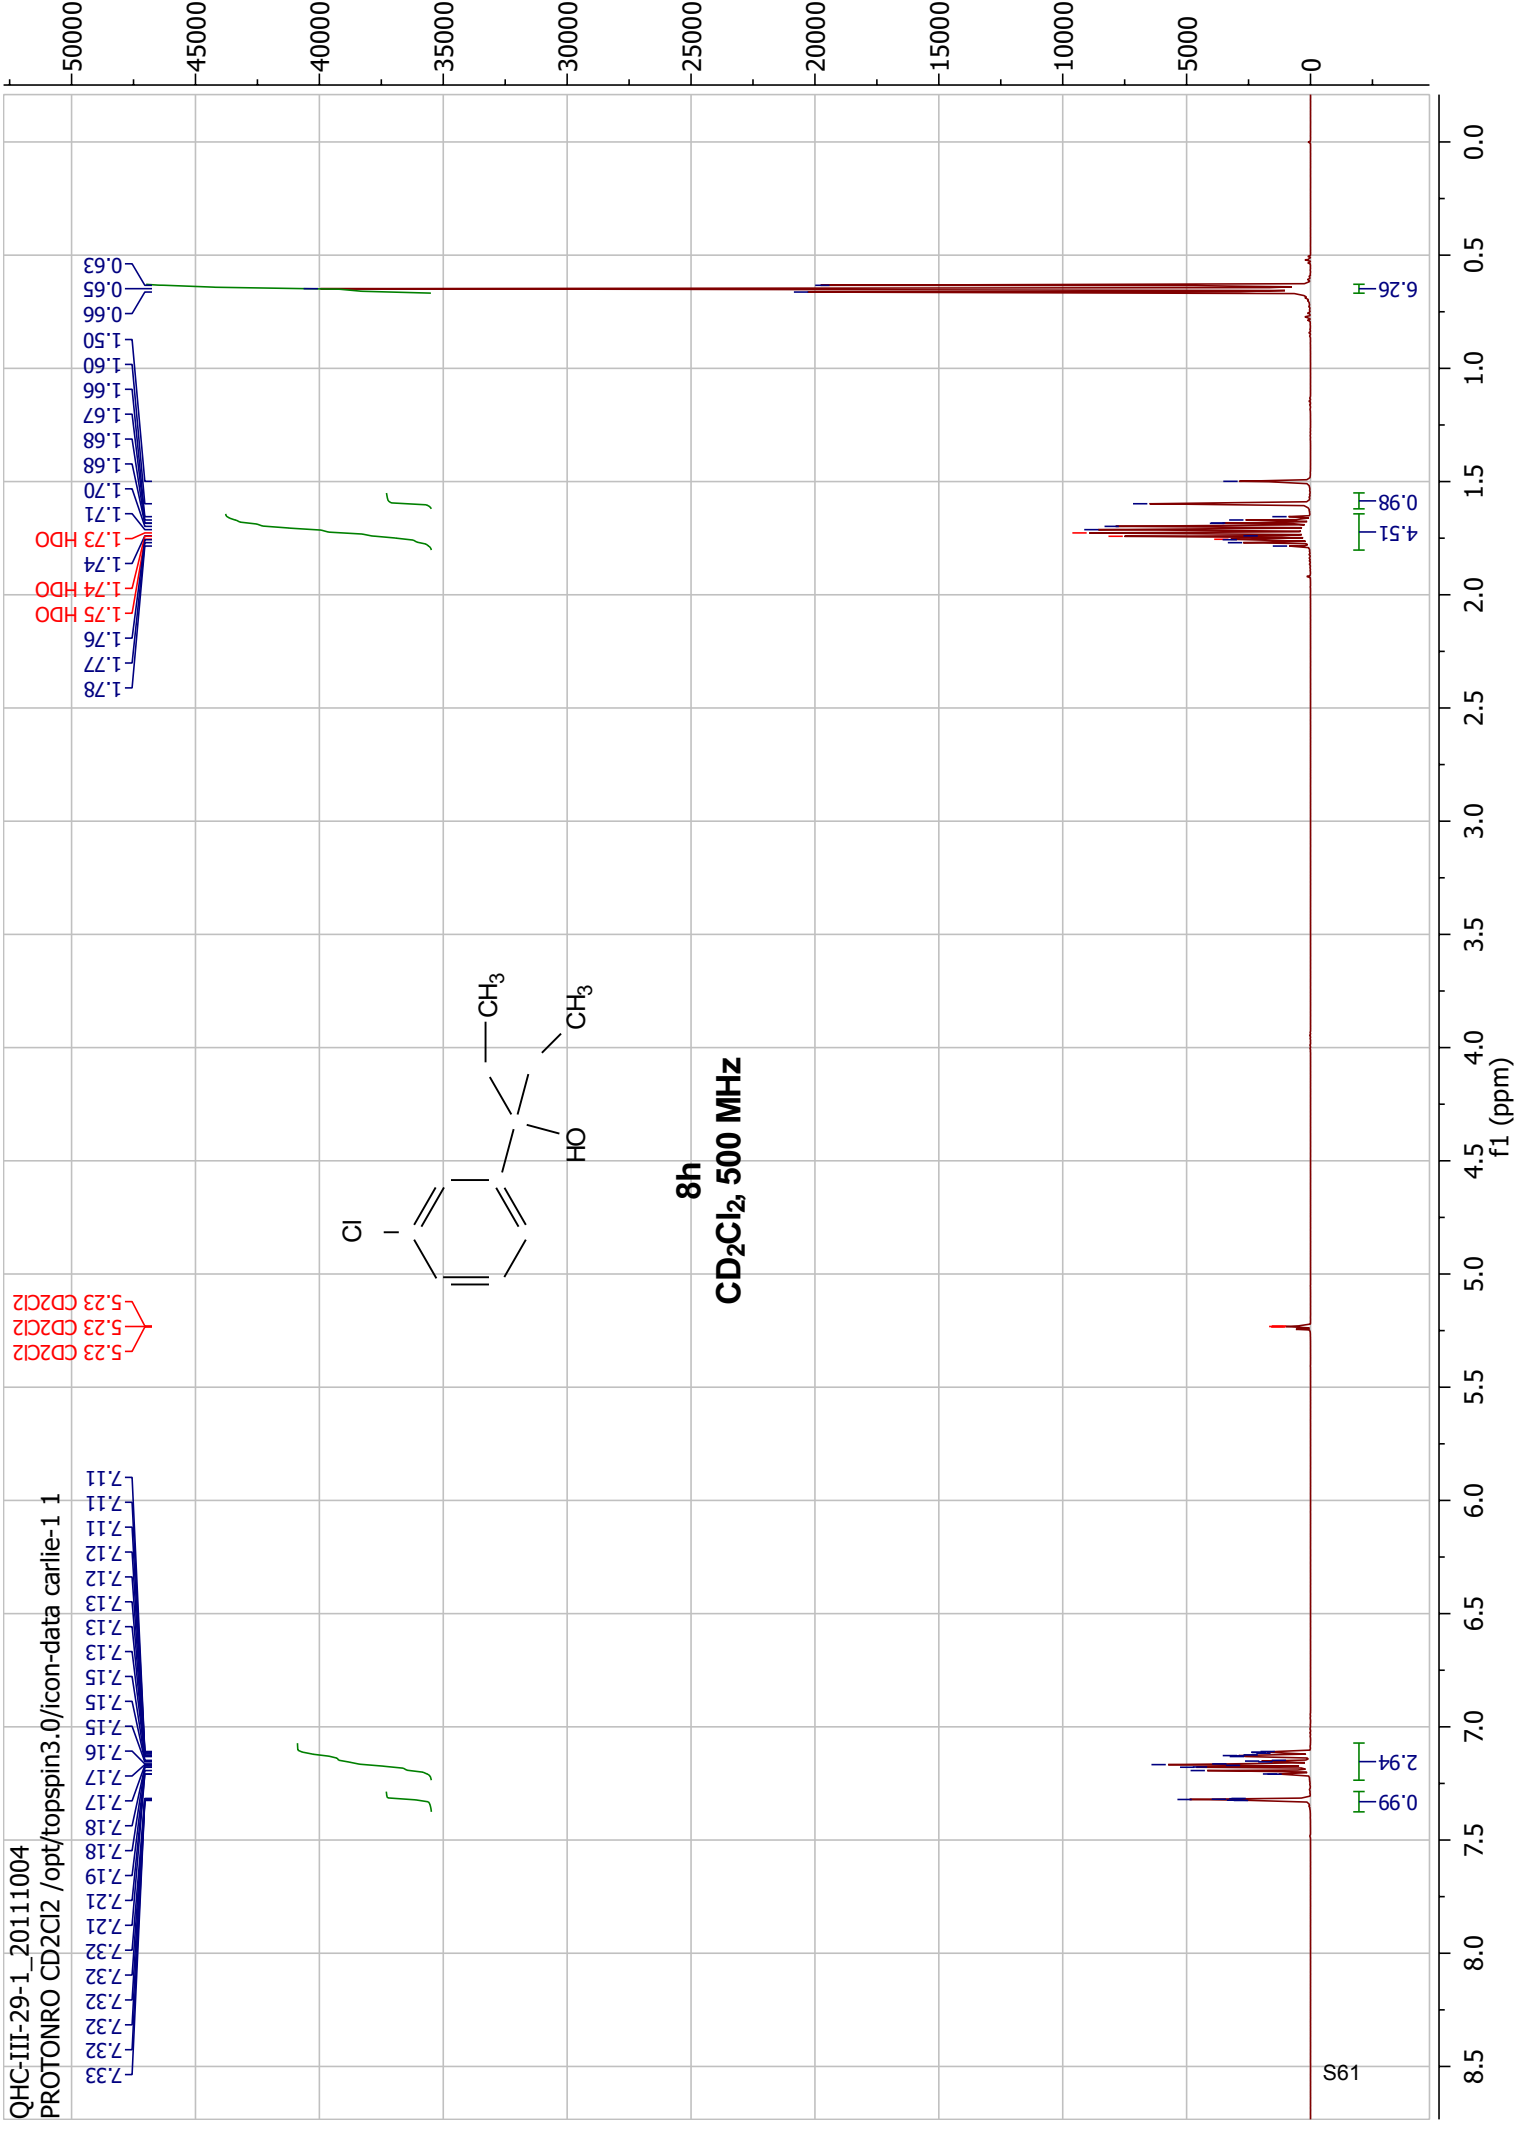

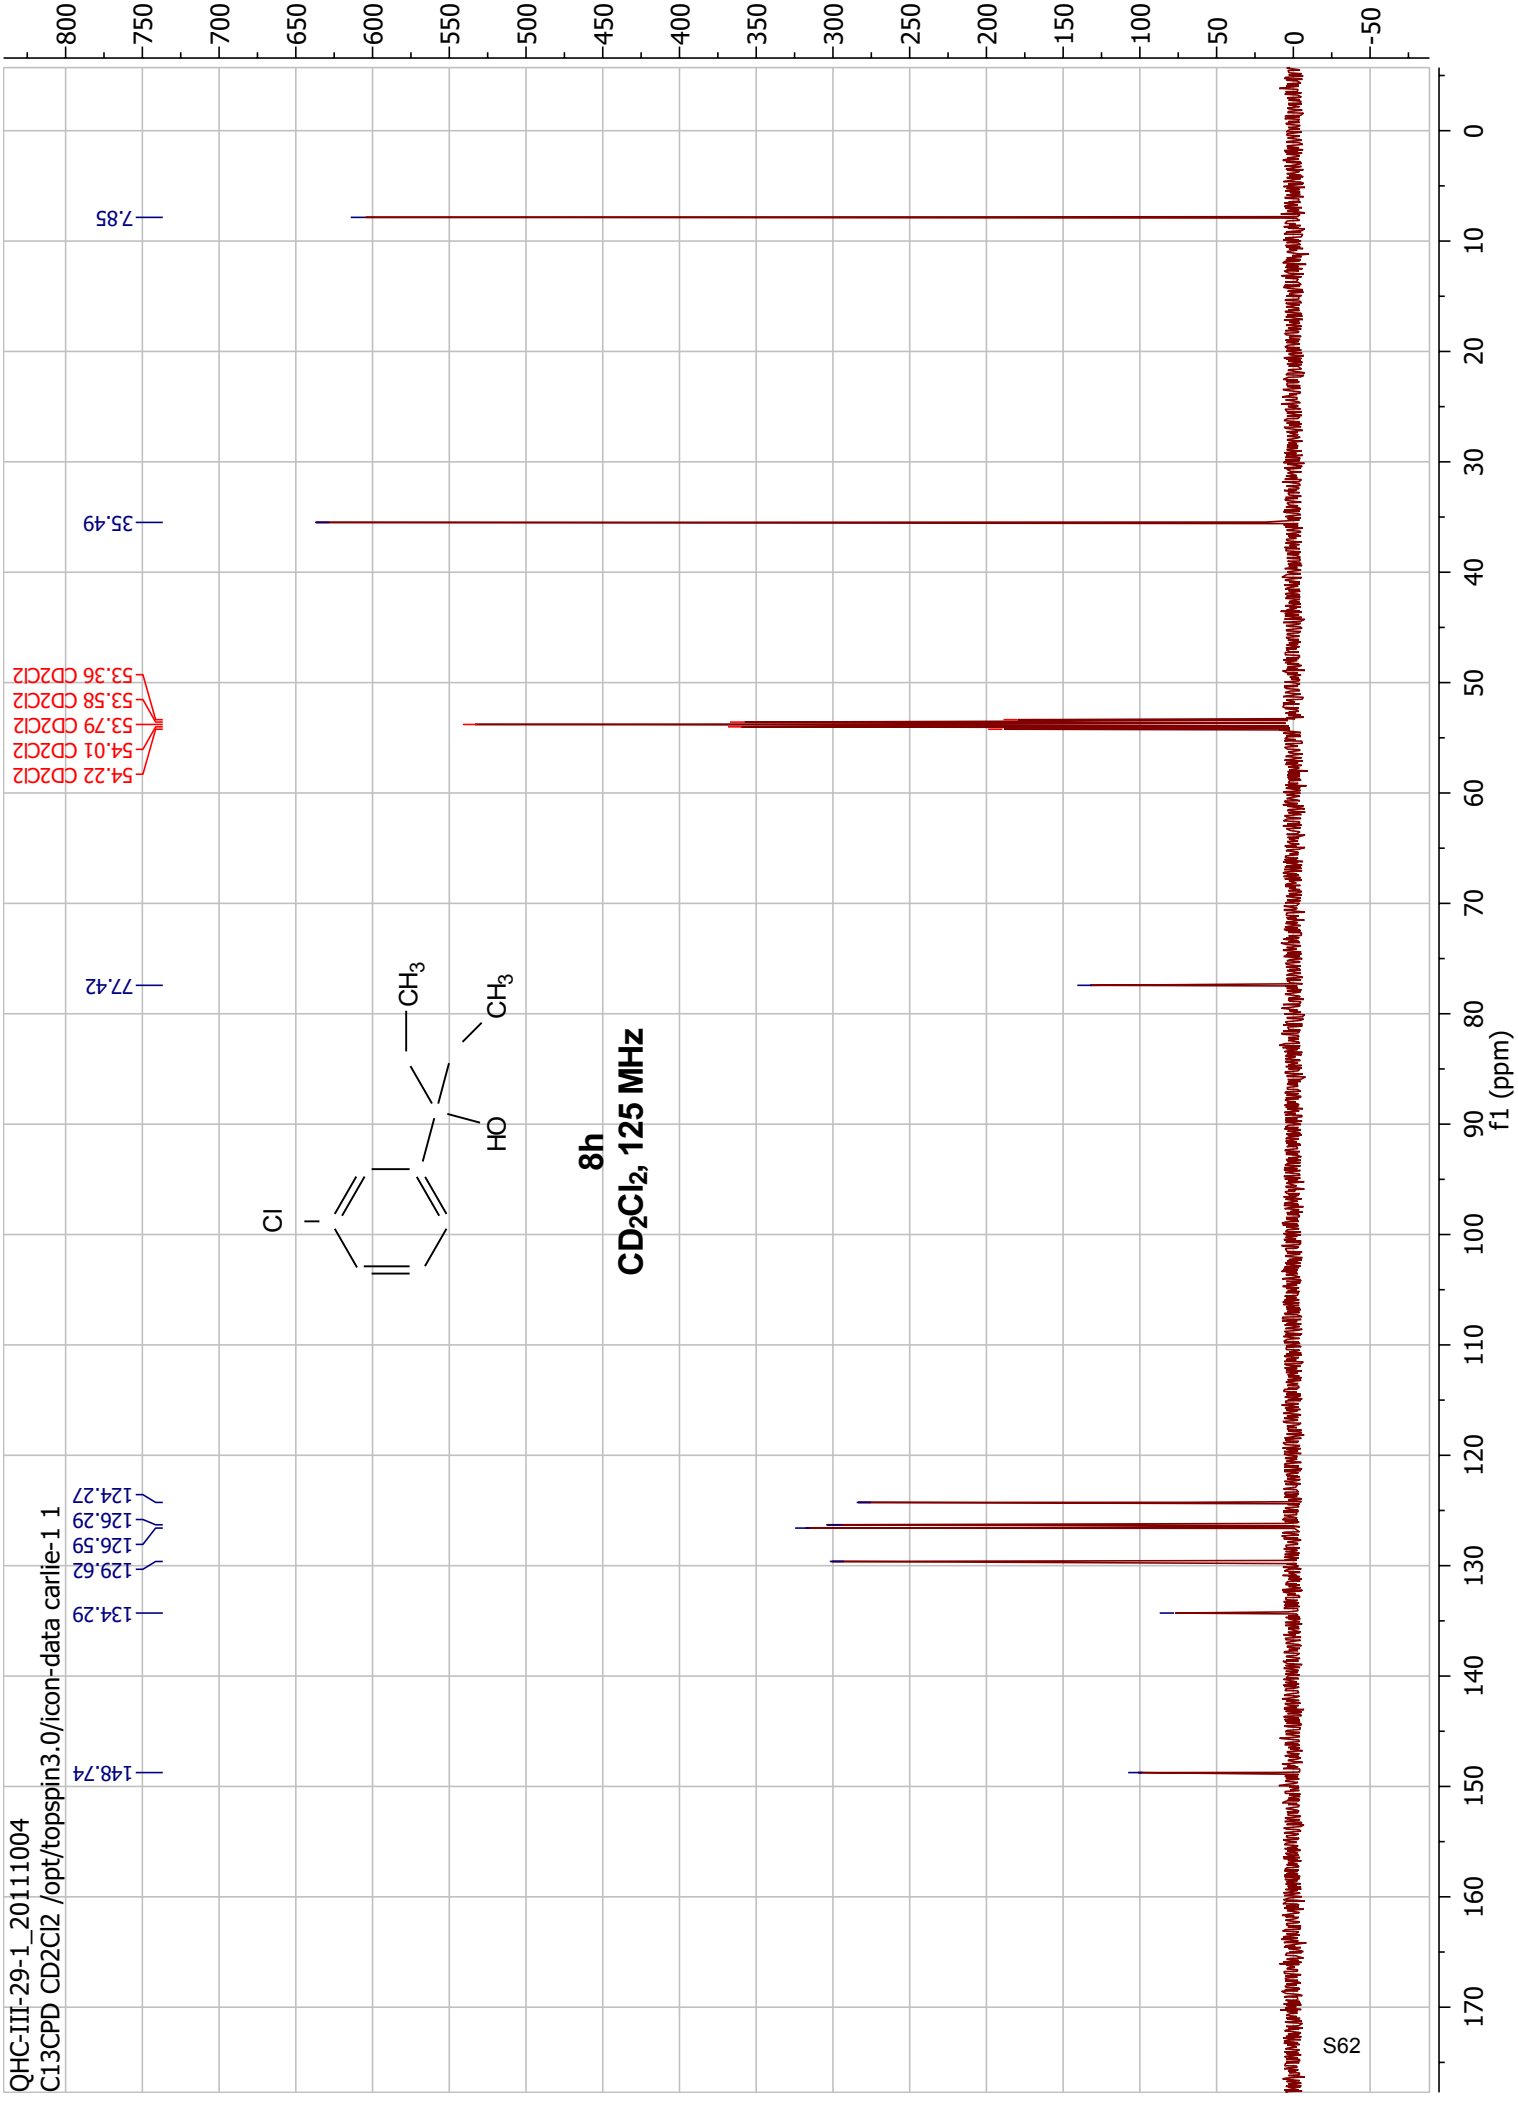

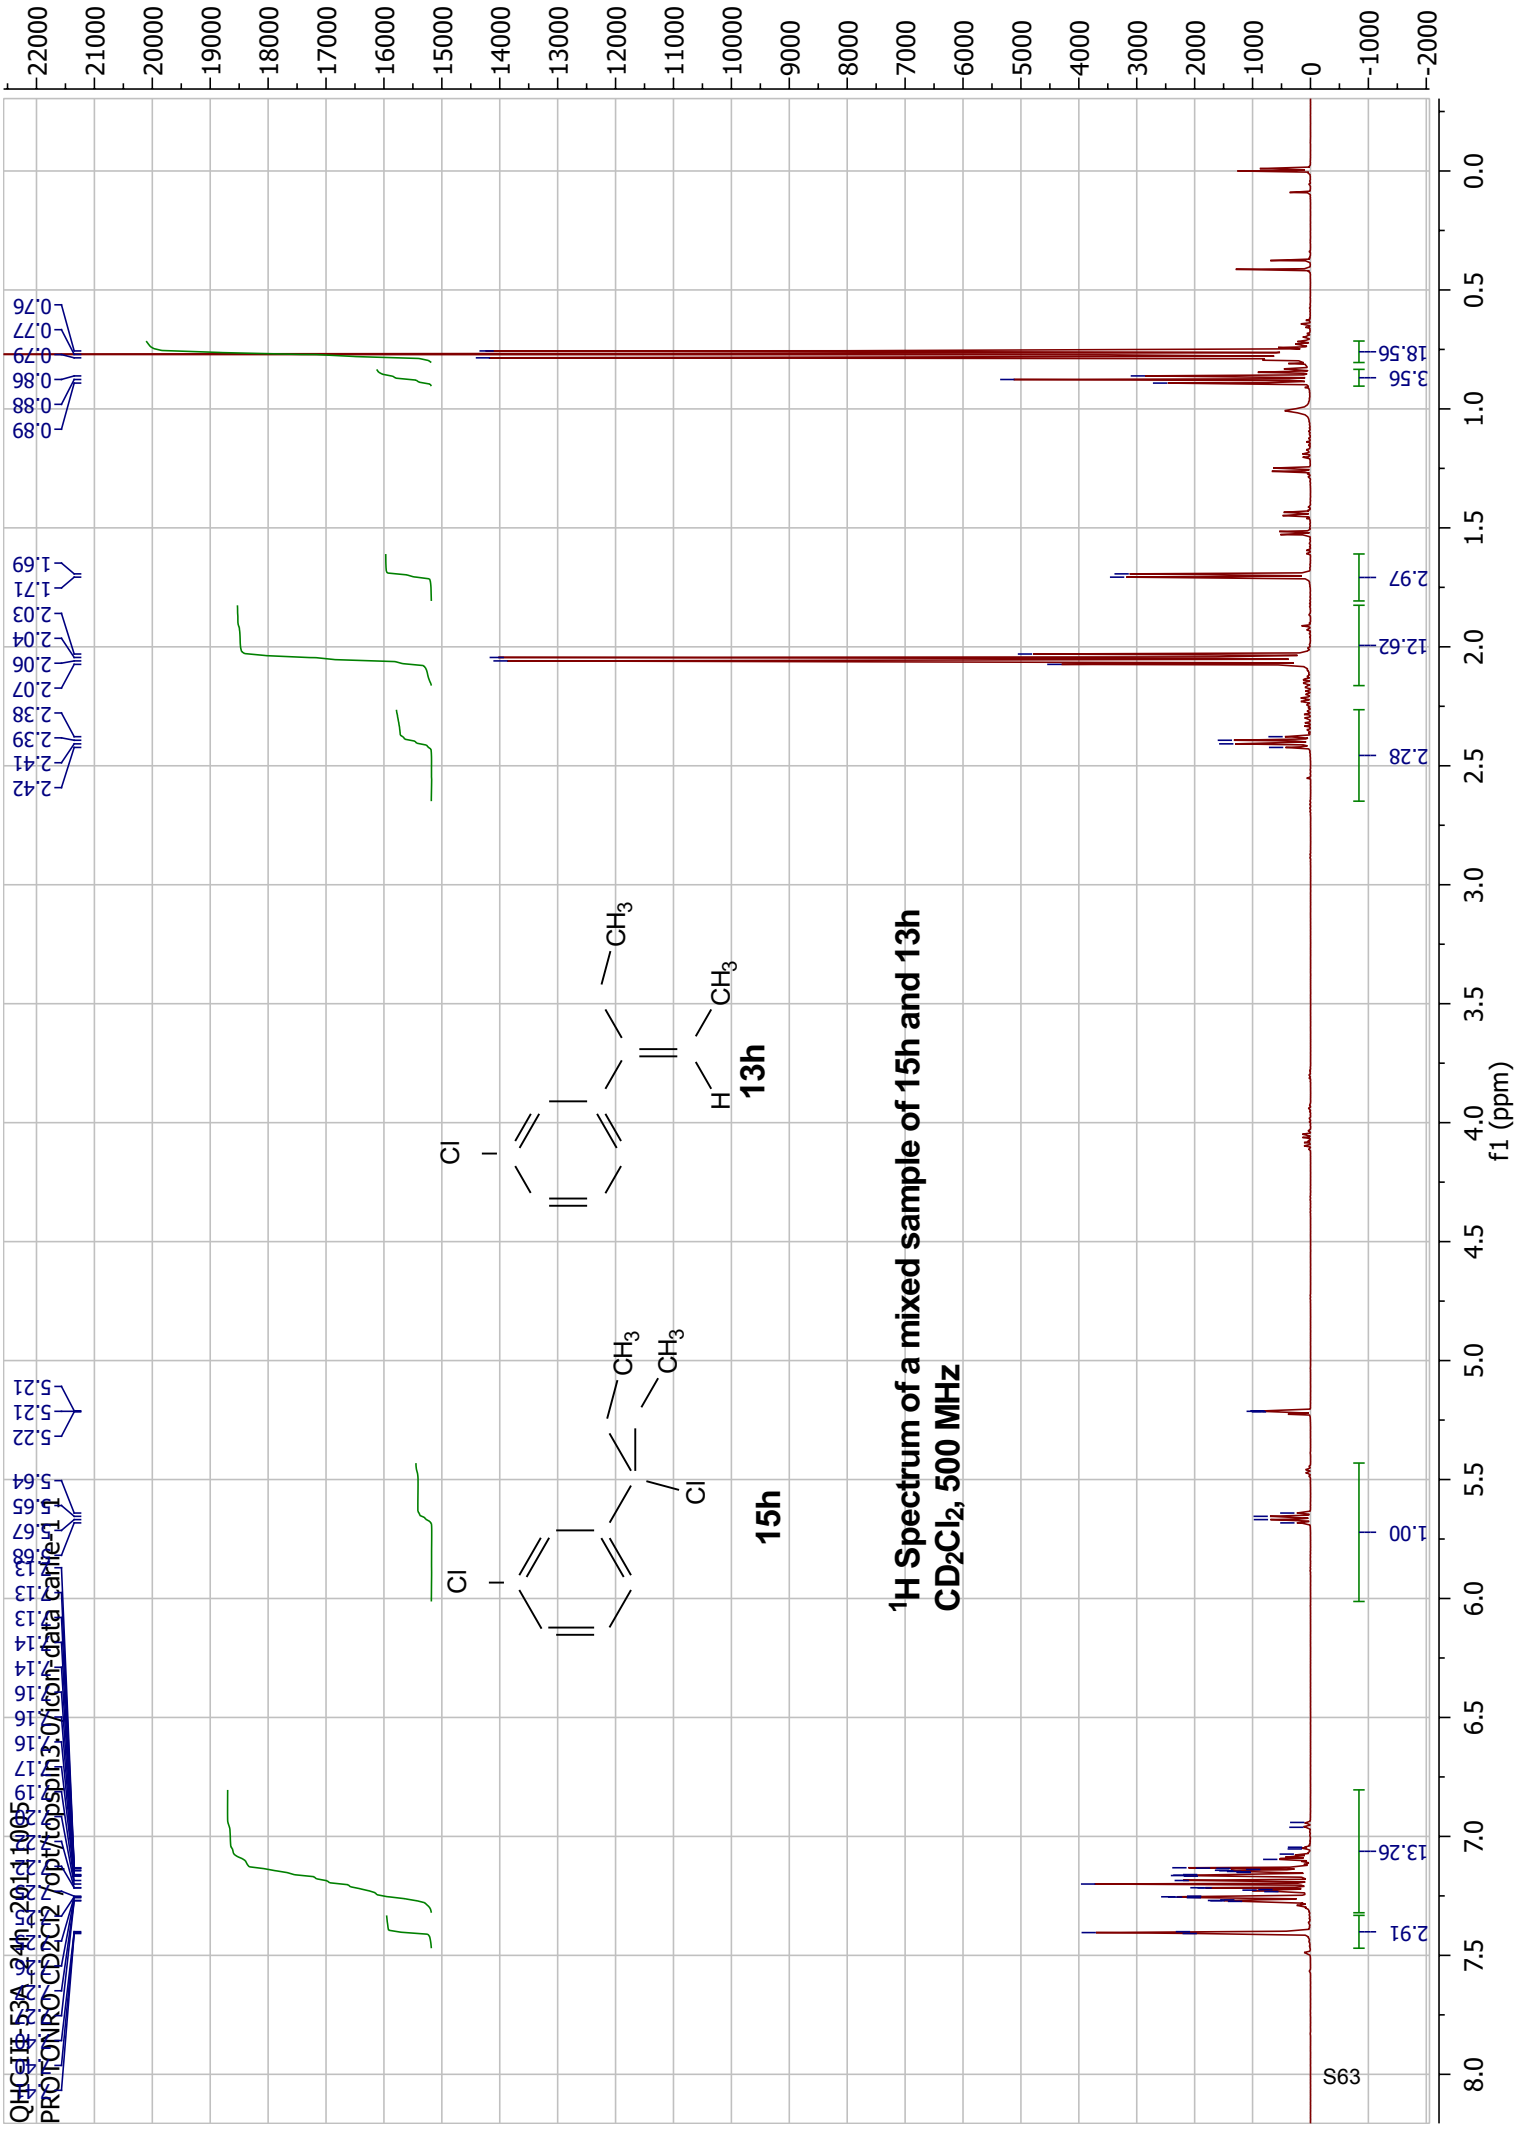

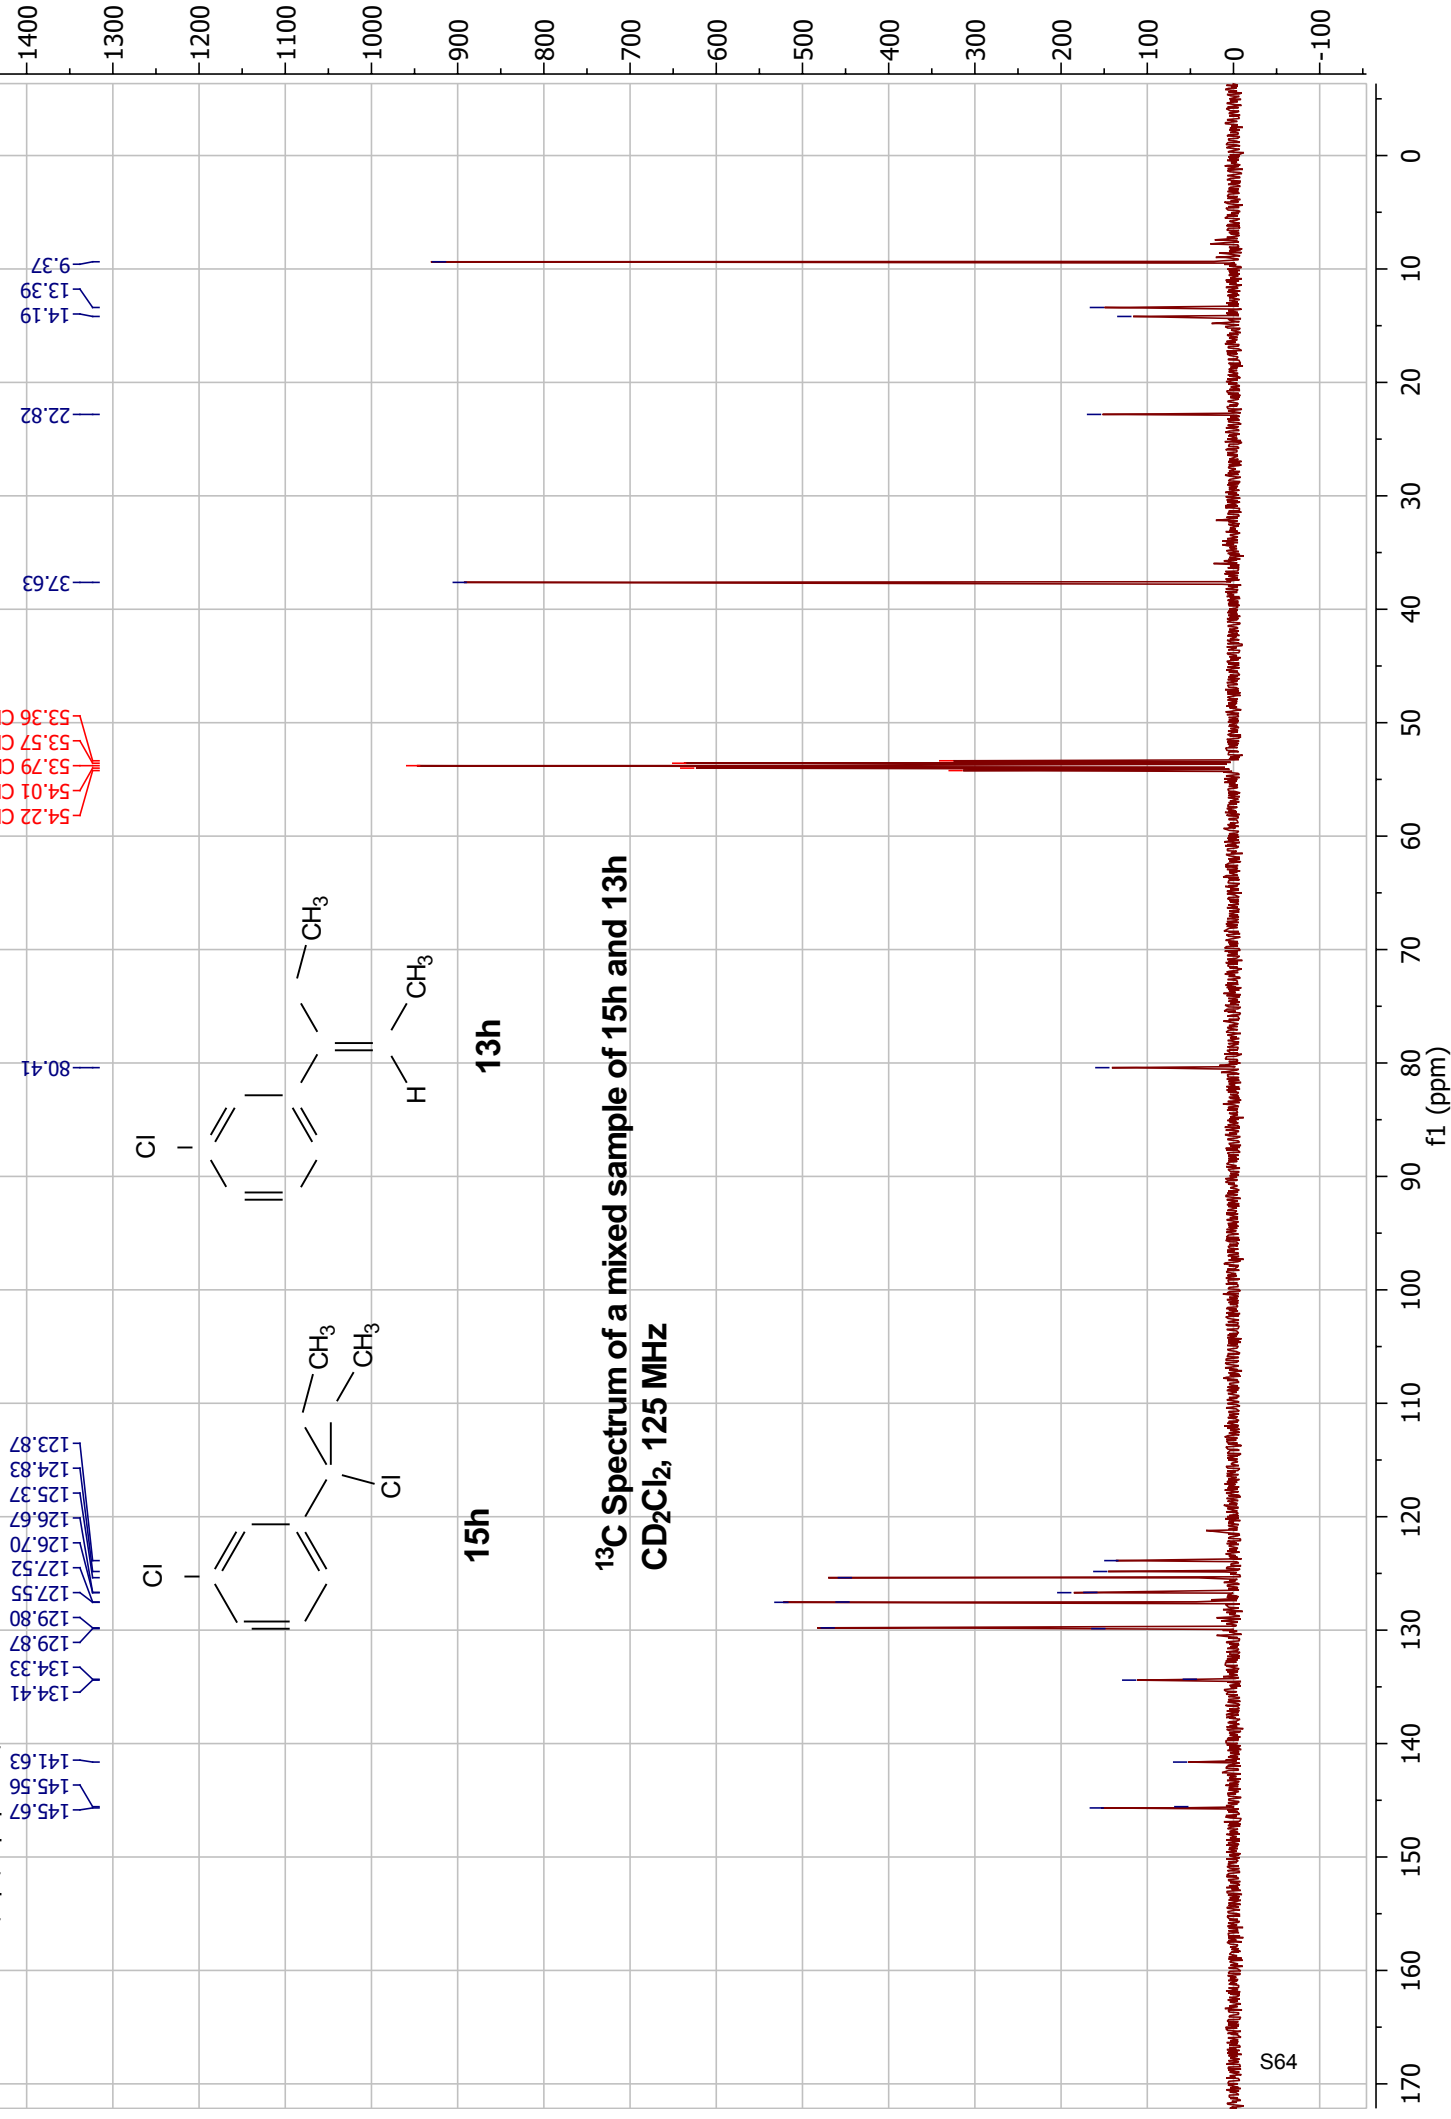

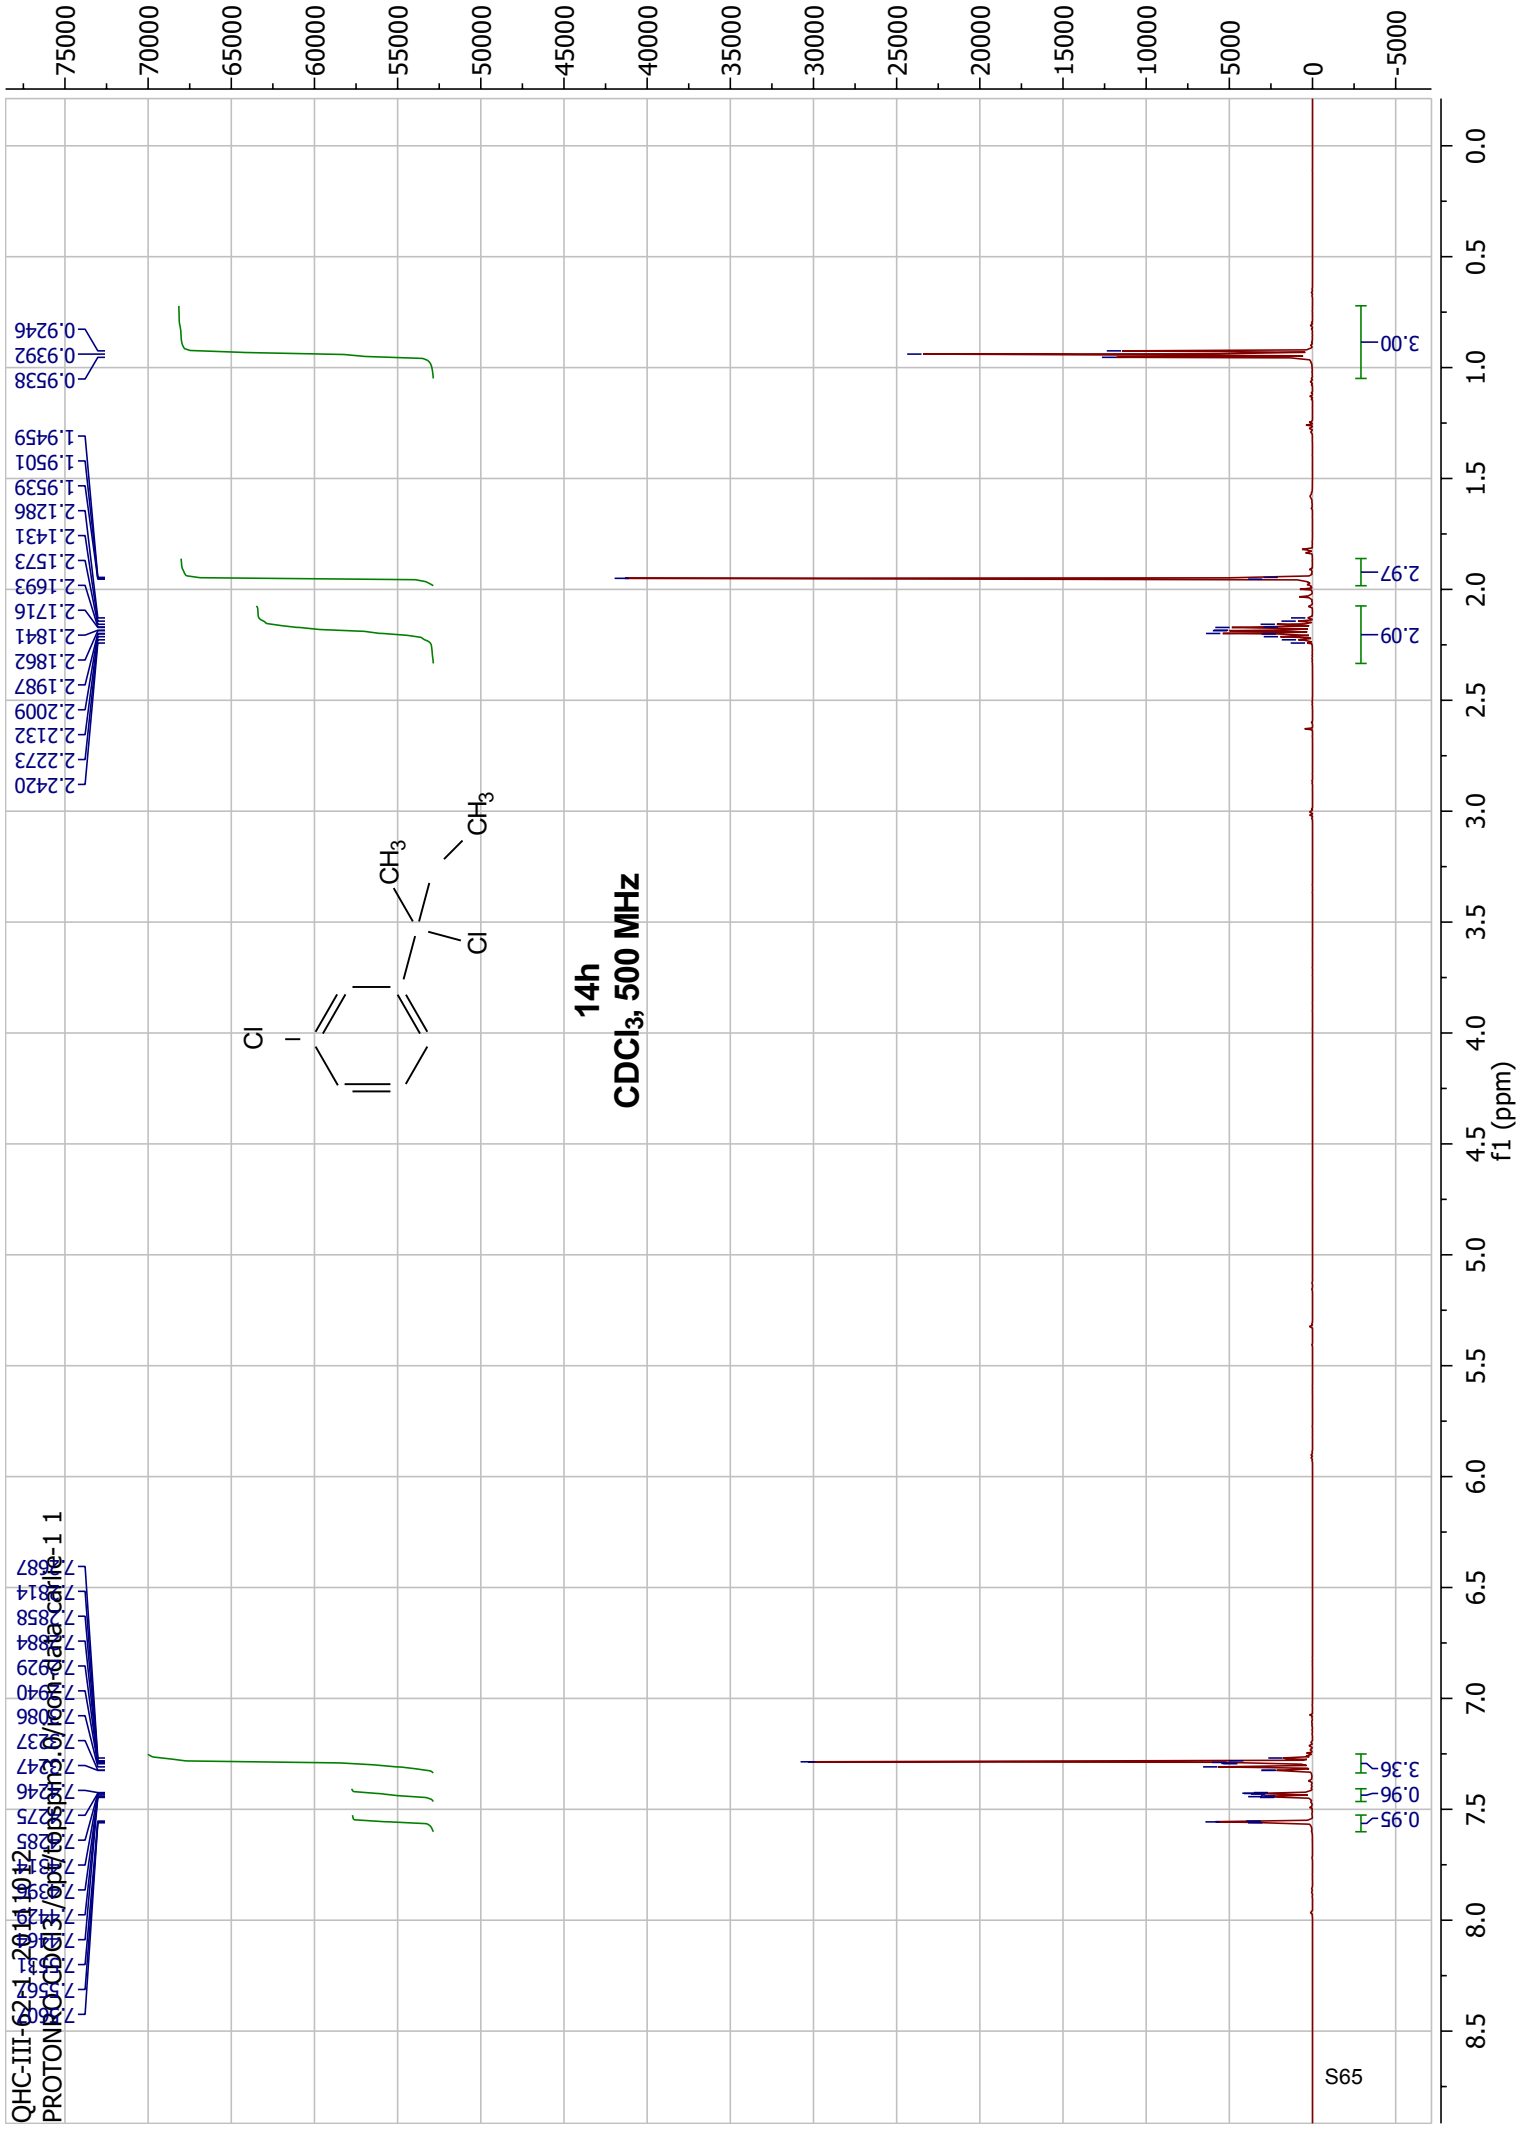

QHC-III-62-1\_20111012

C13CPD CDCl3 /opt/topspin3.0/icon-data carlie-1 1

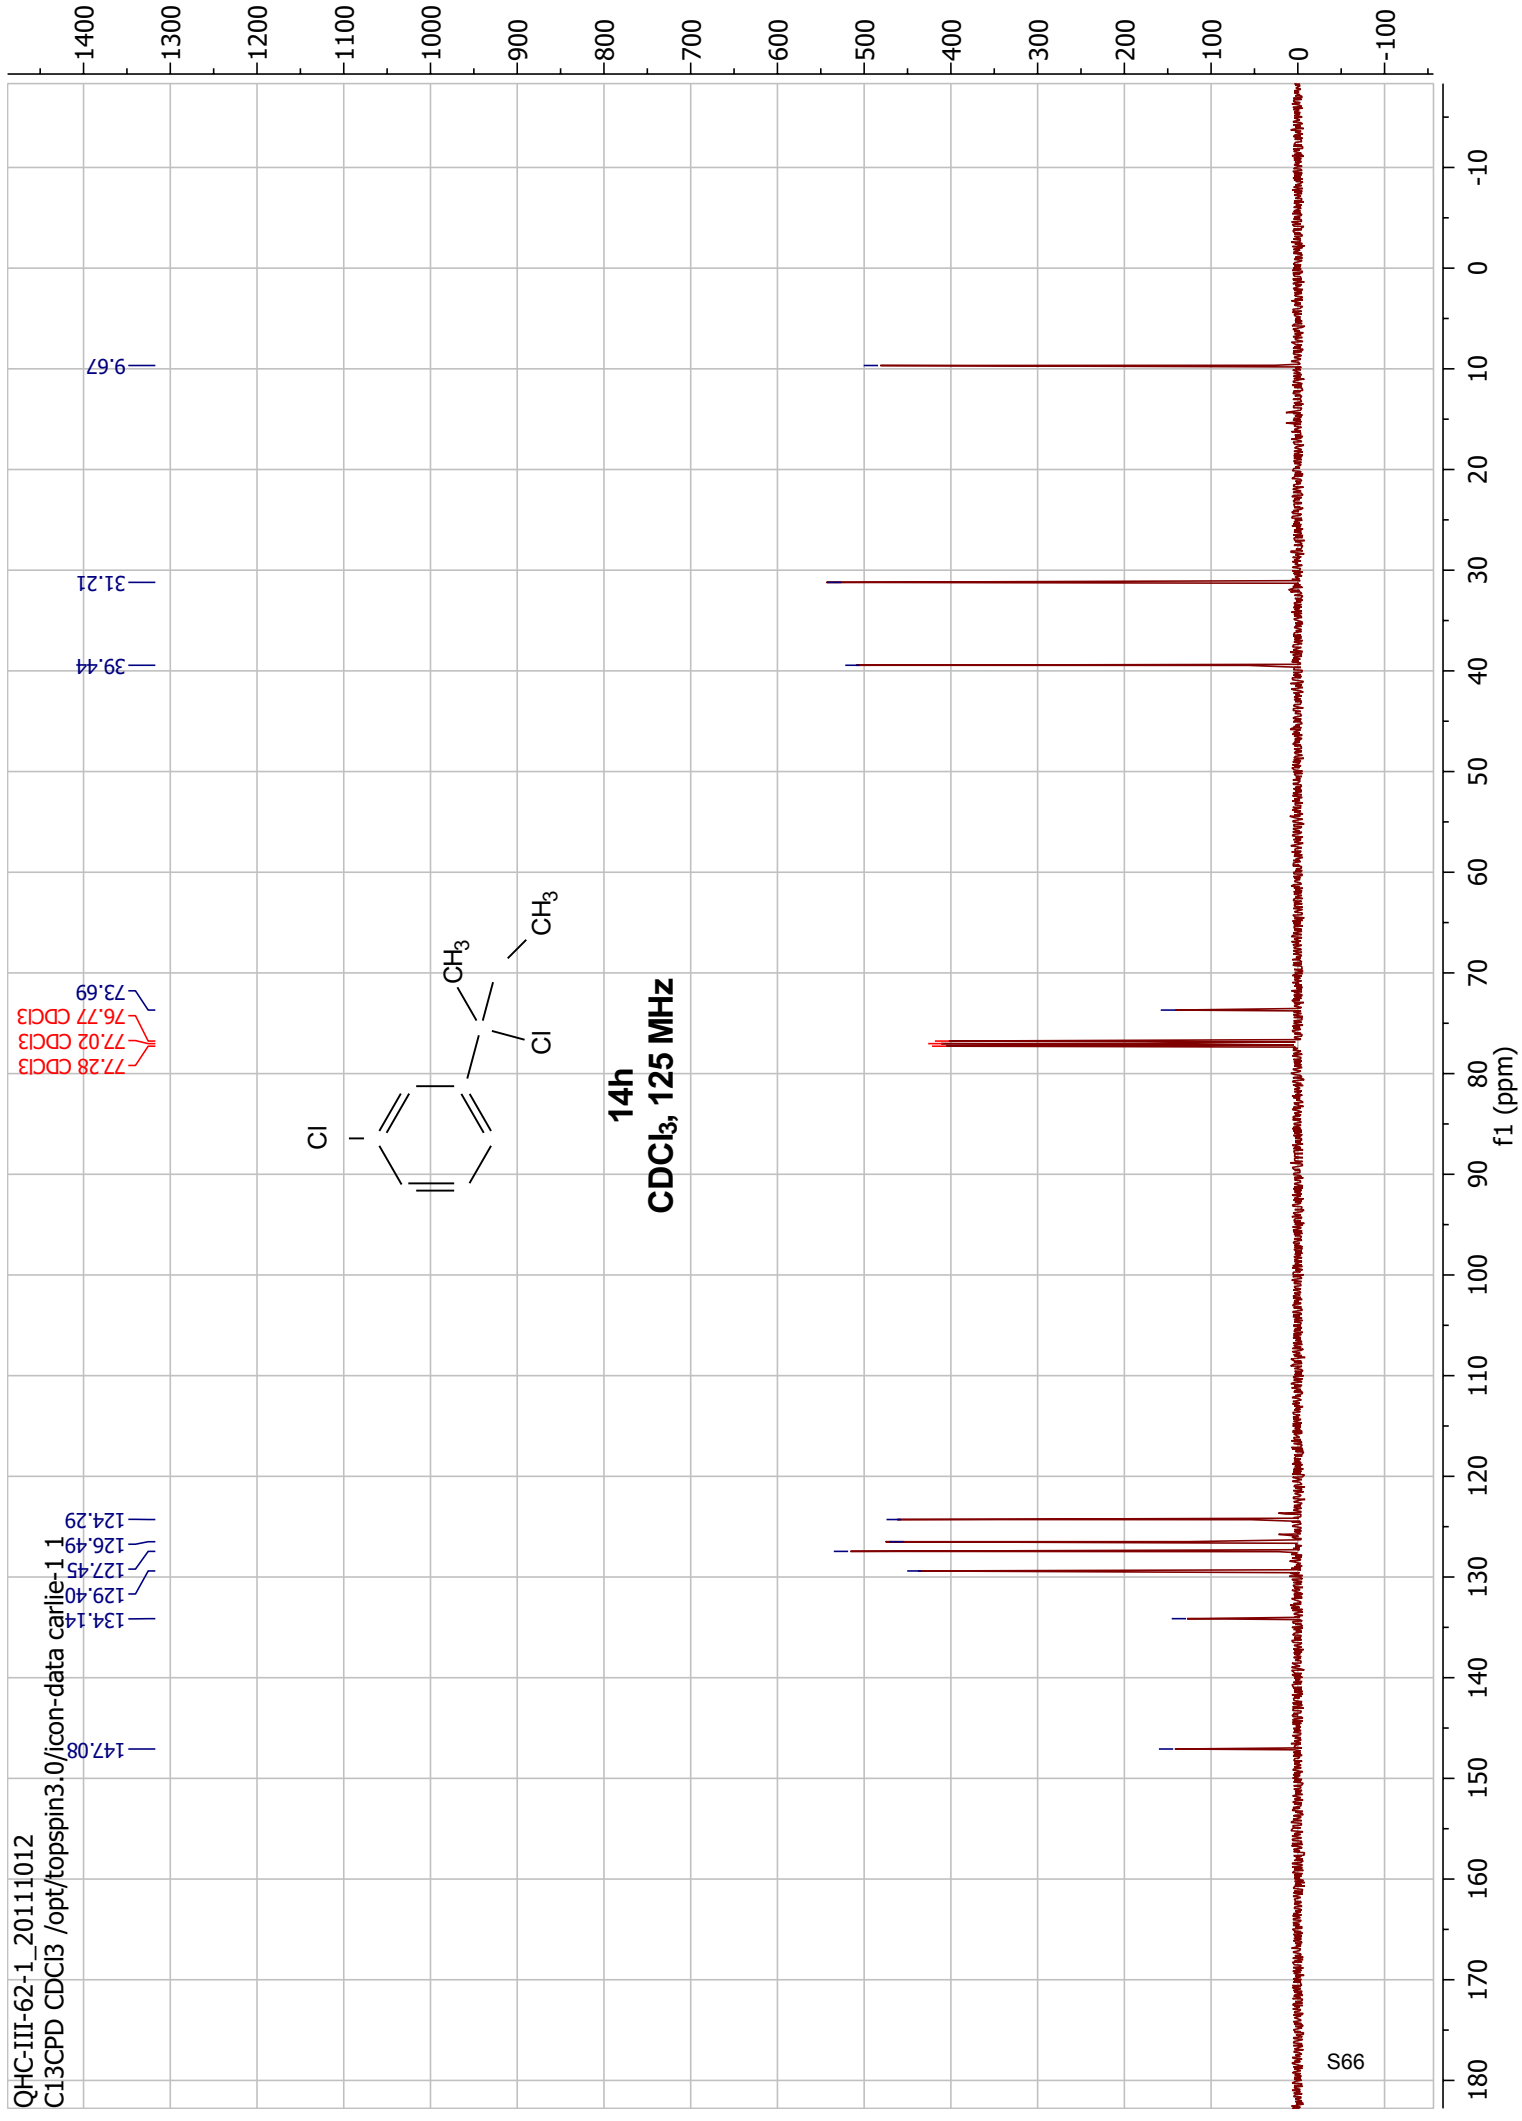

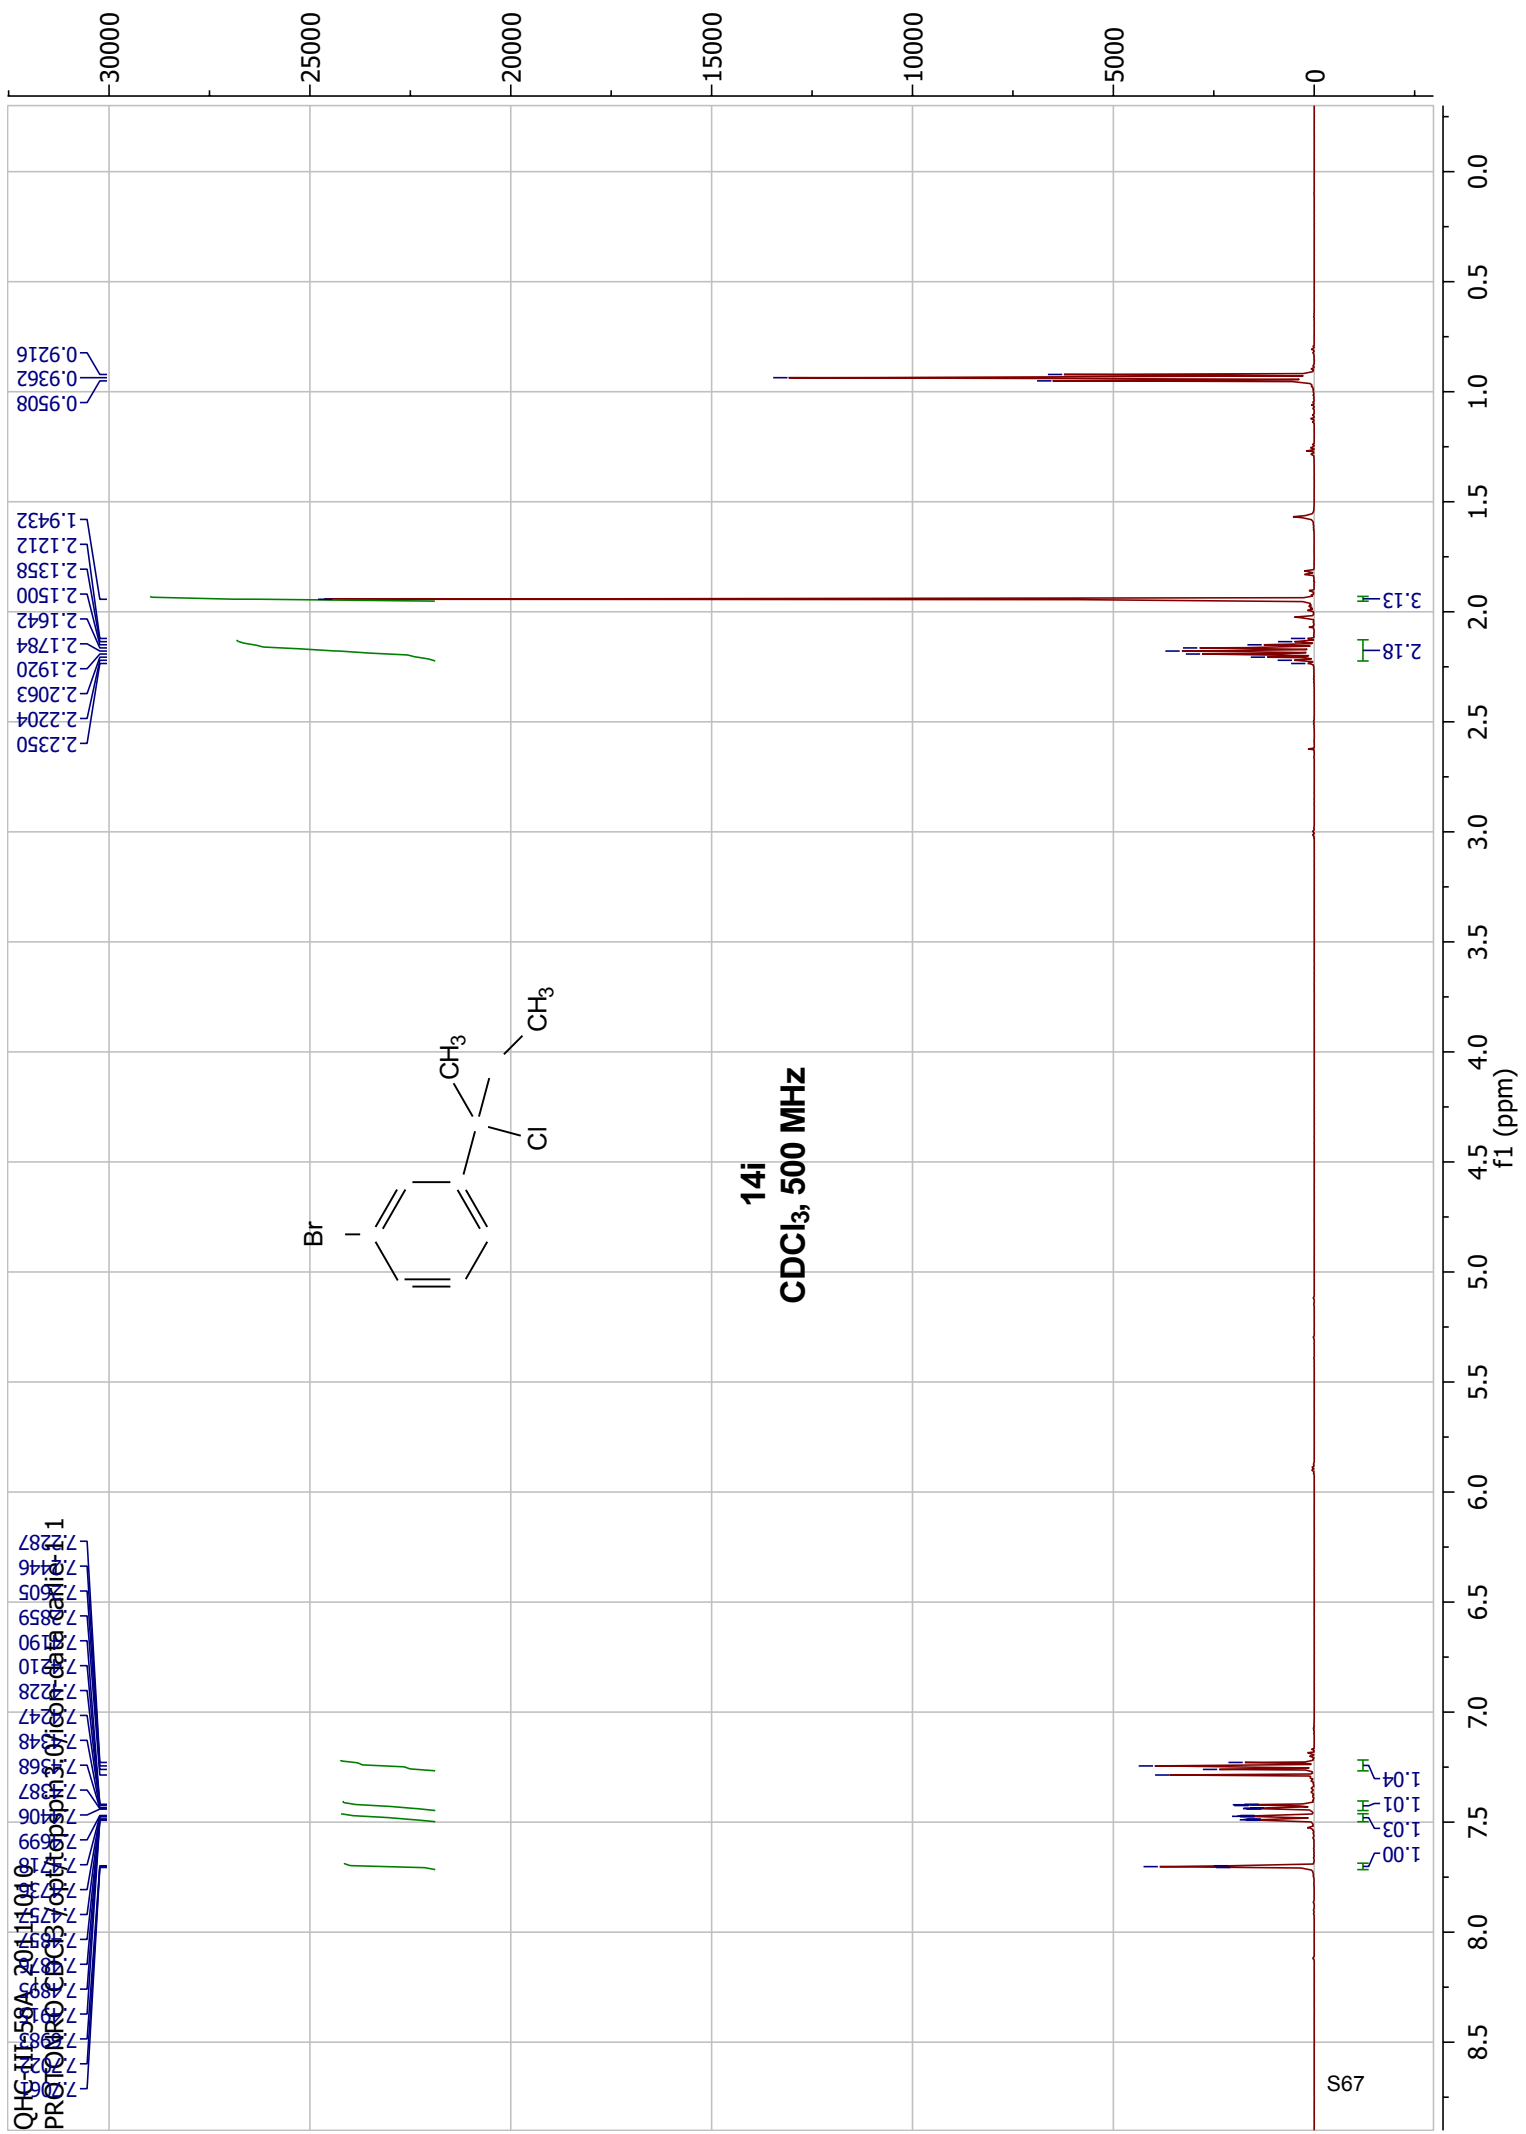



QHC-III-58A\_20111010

C13CPD CDCl3 /opt/topspin3.0/icon-data carlie-1 1

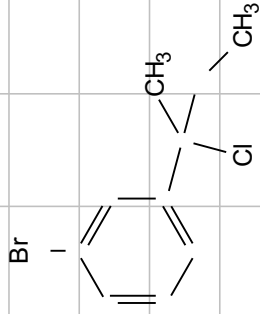

14j

CDCl<sub>3</sub>, 125 MHz

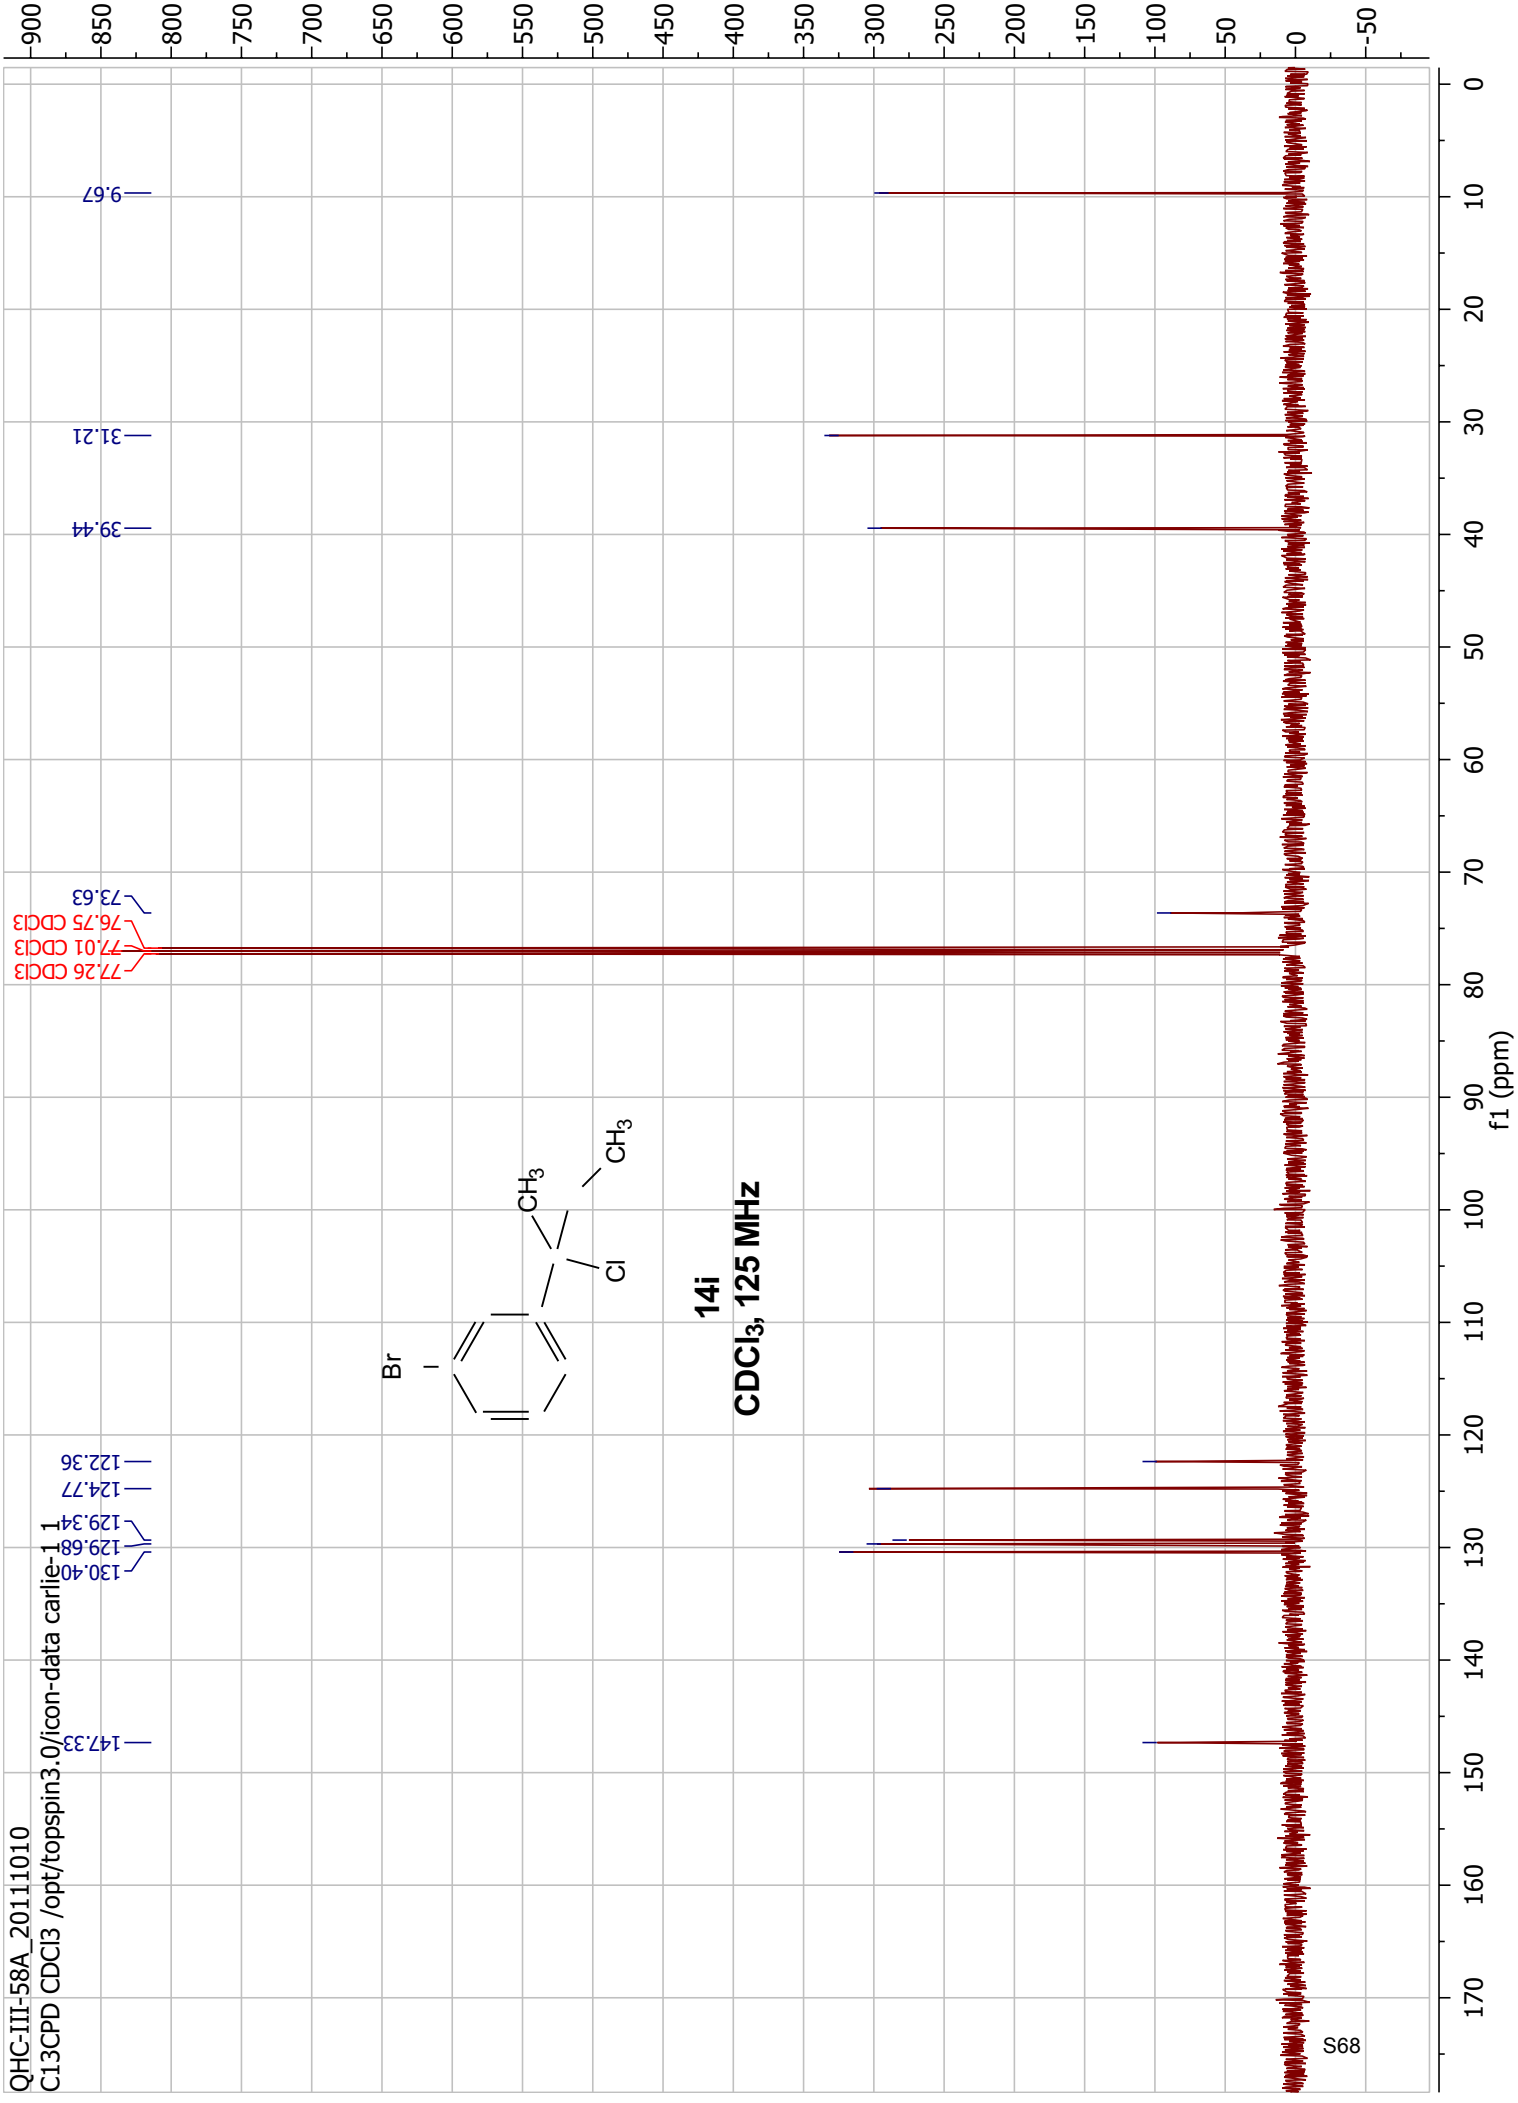

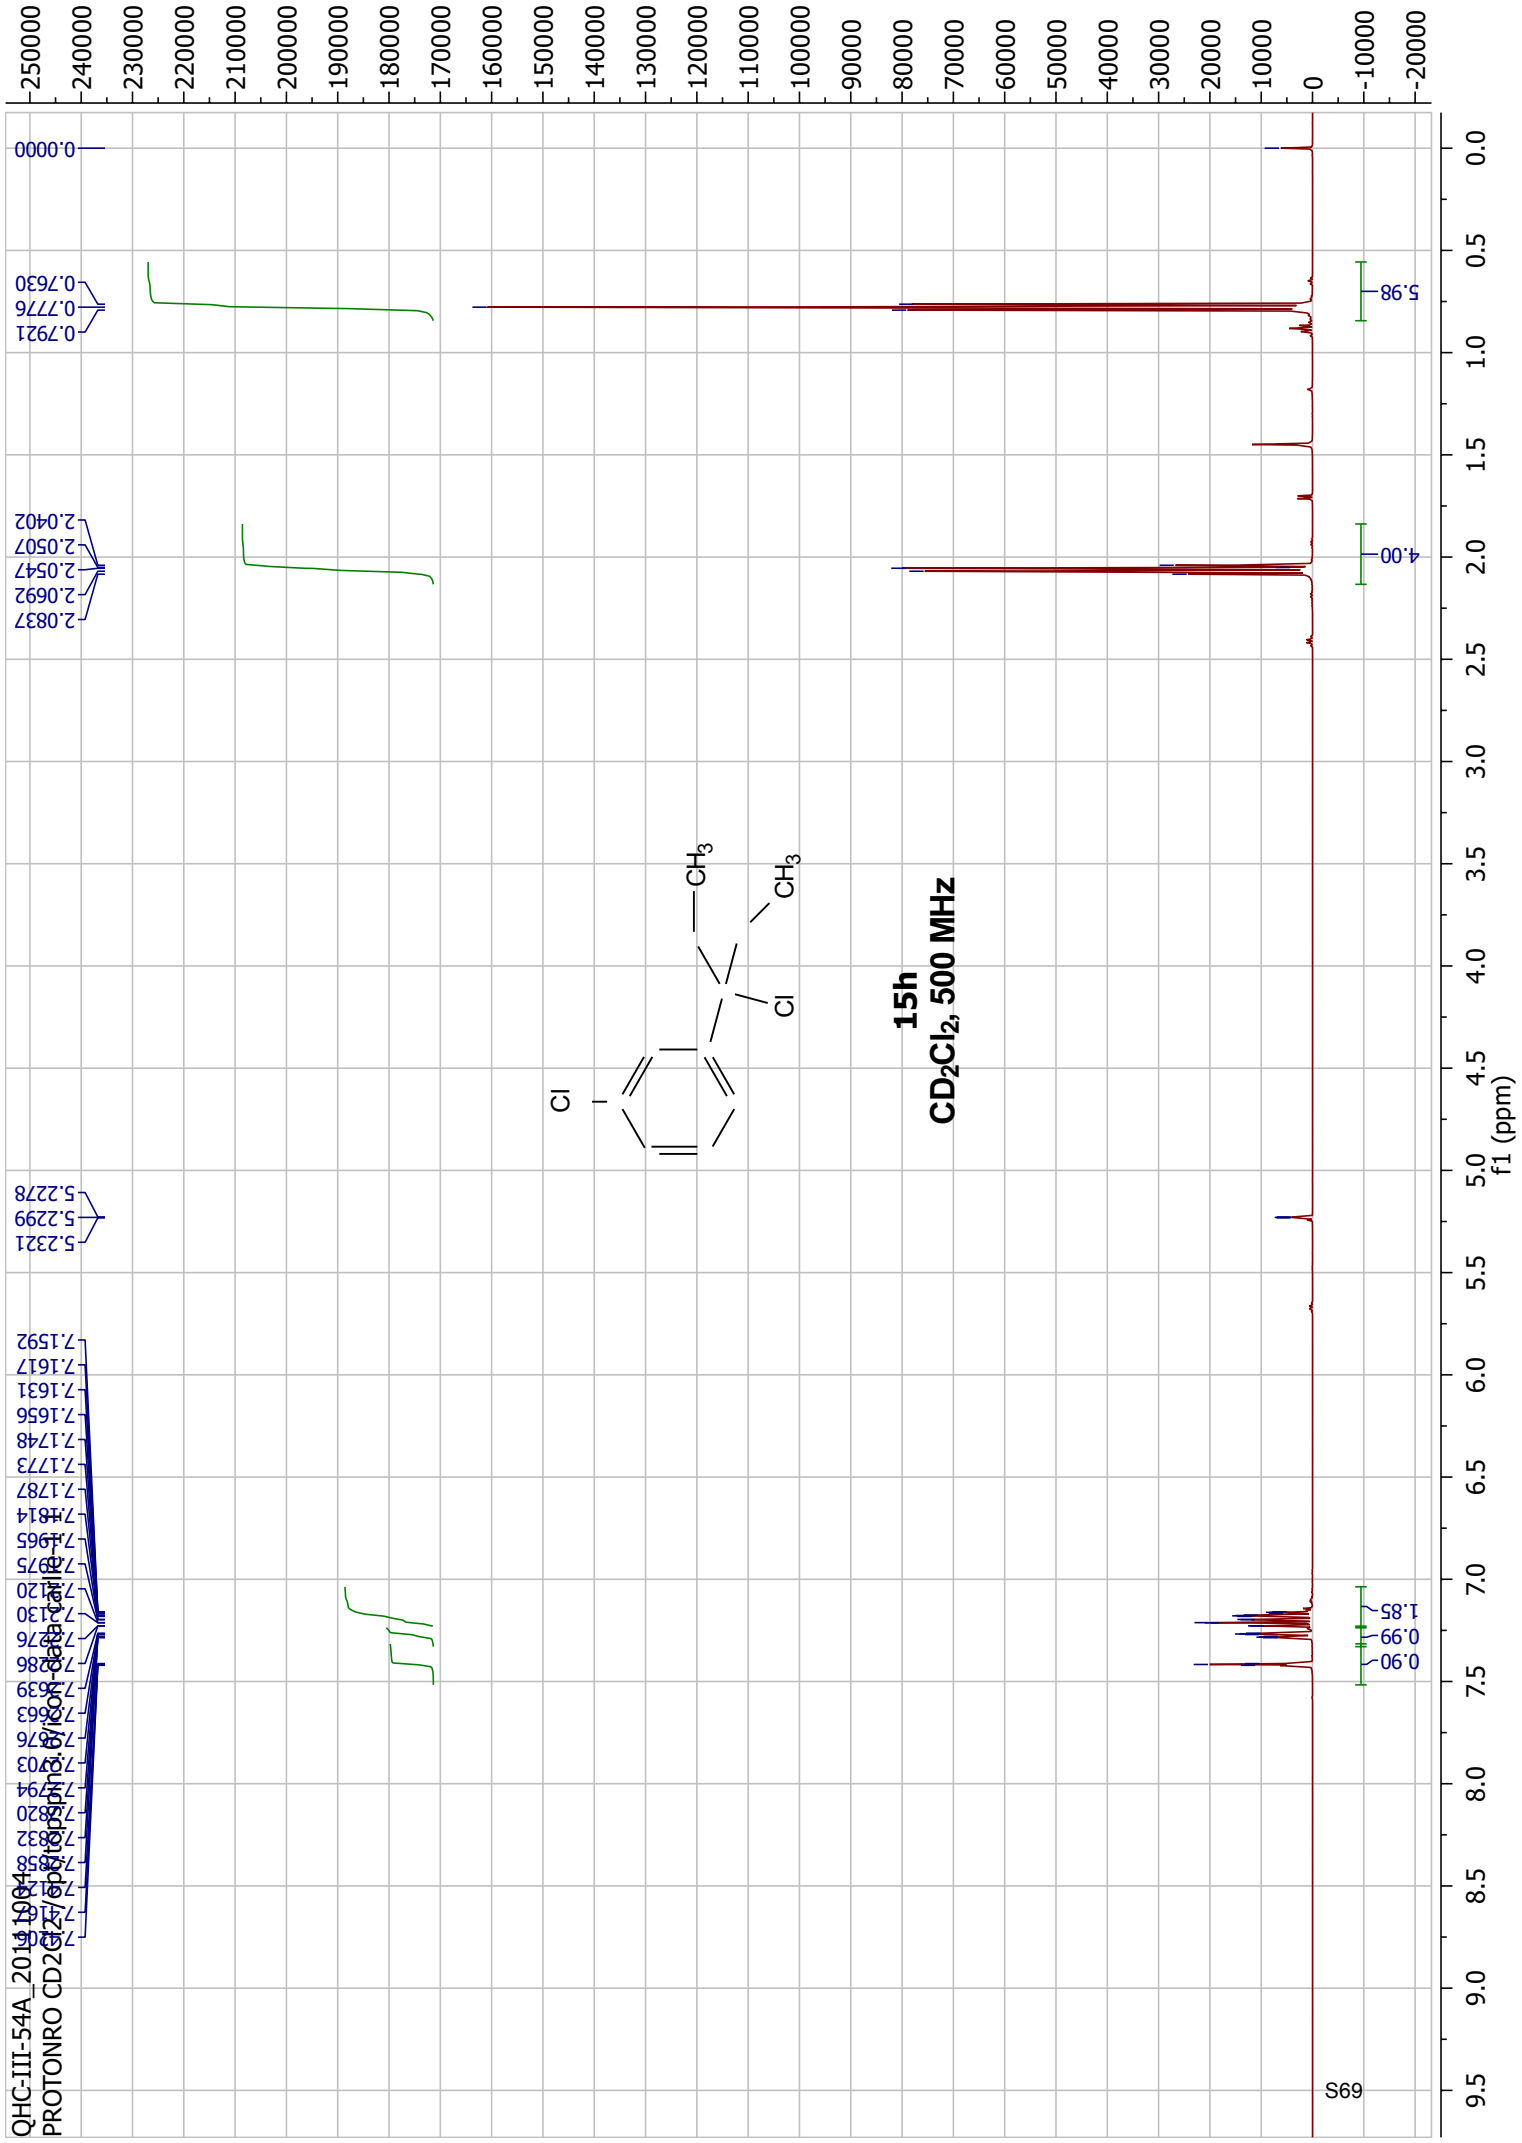

QHC-III-54A\_20111004

C13CPD CD2Cl2 /opt/topspin3.0/icon-data carlie-1 1

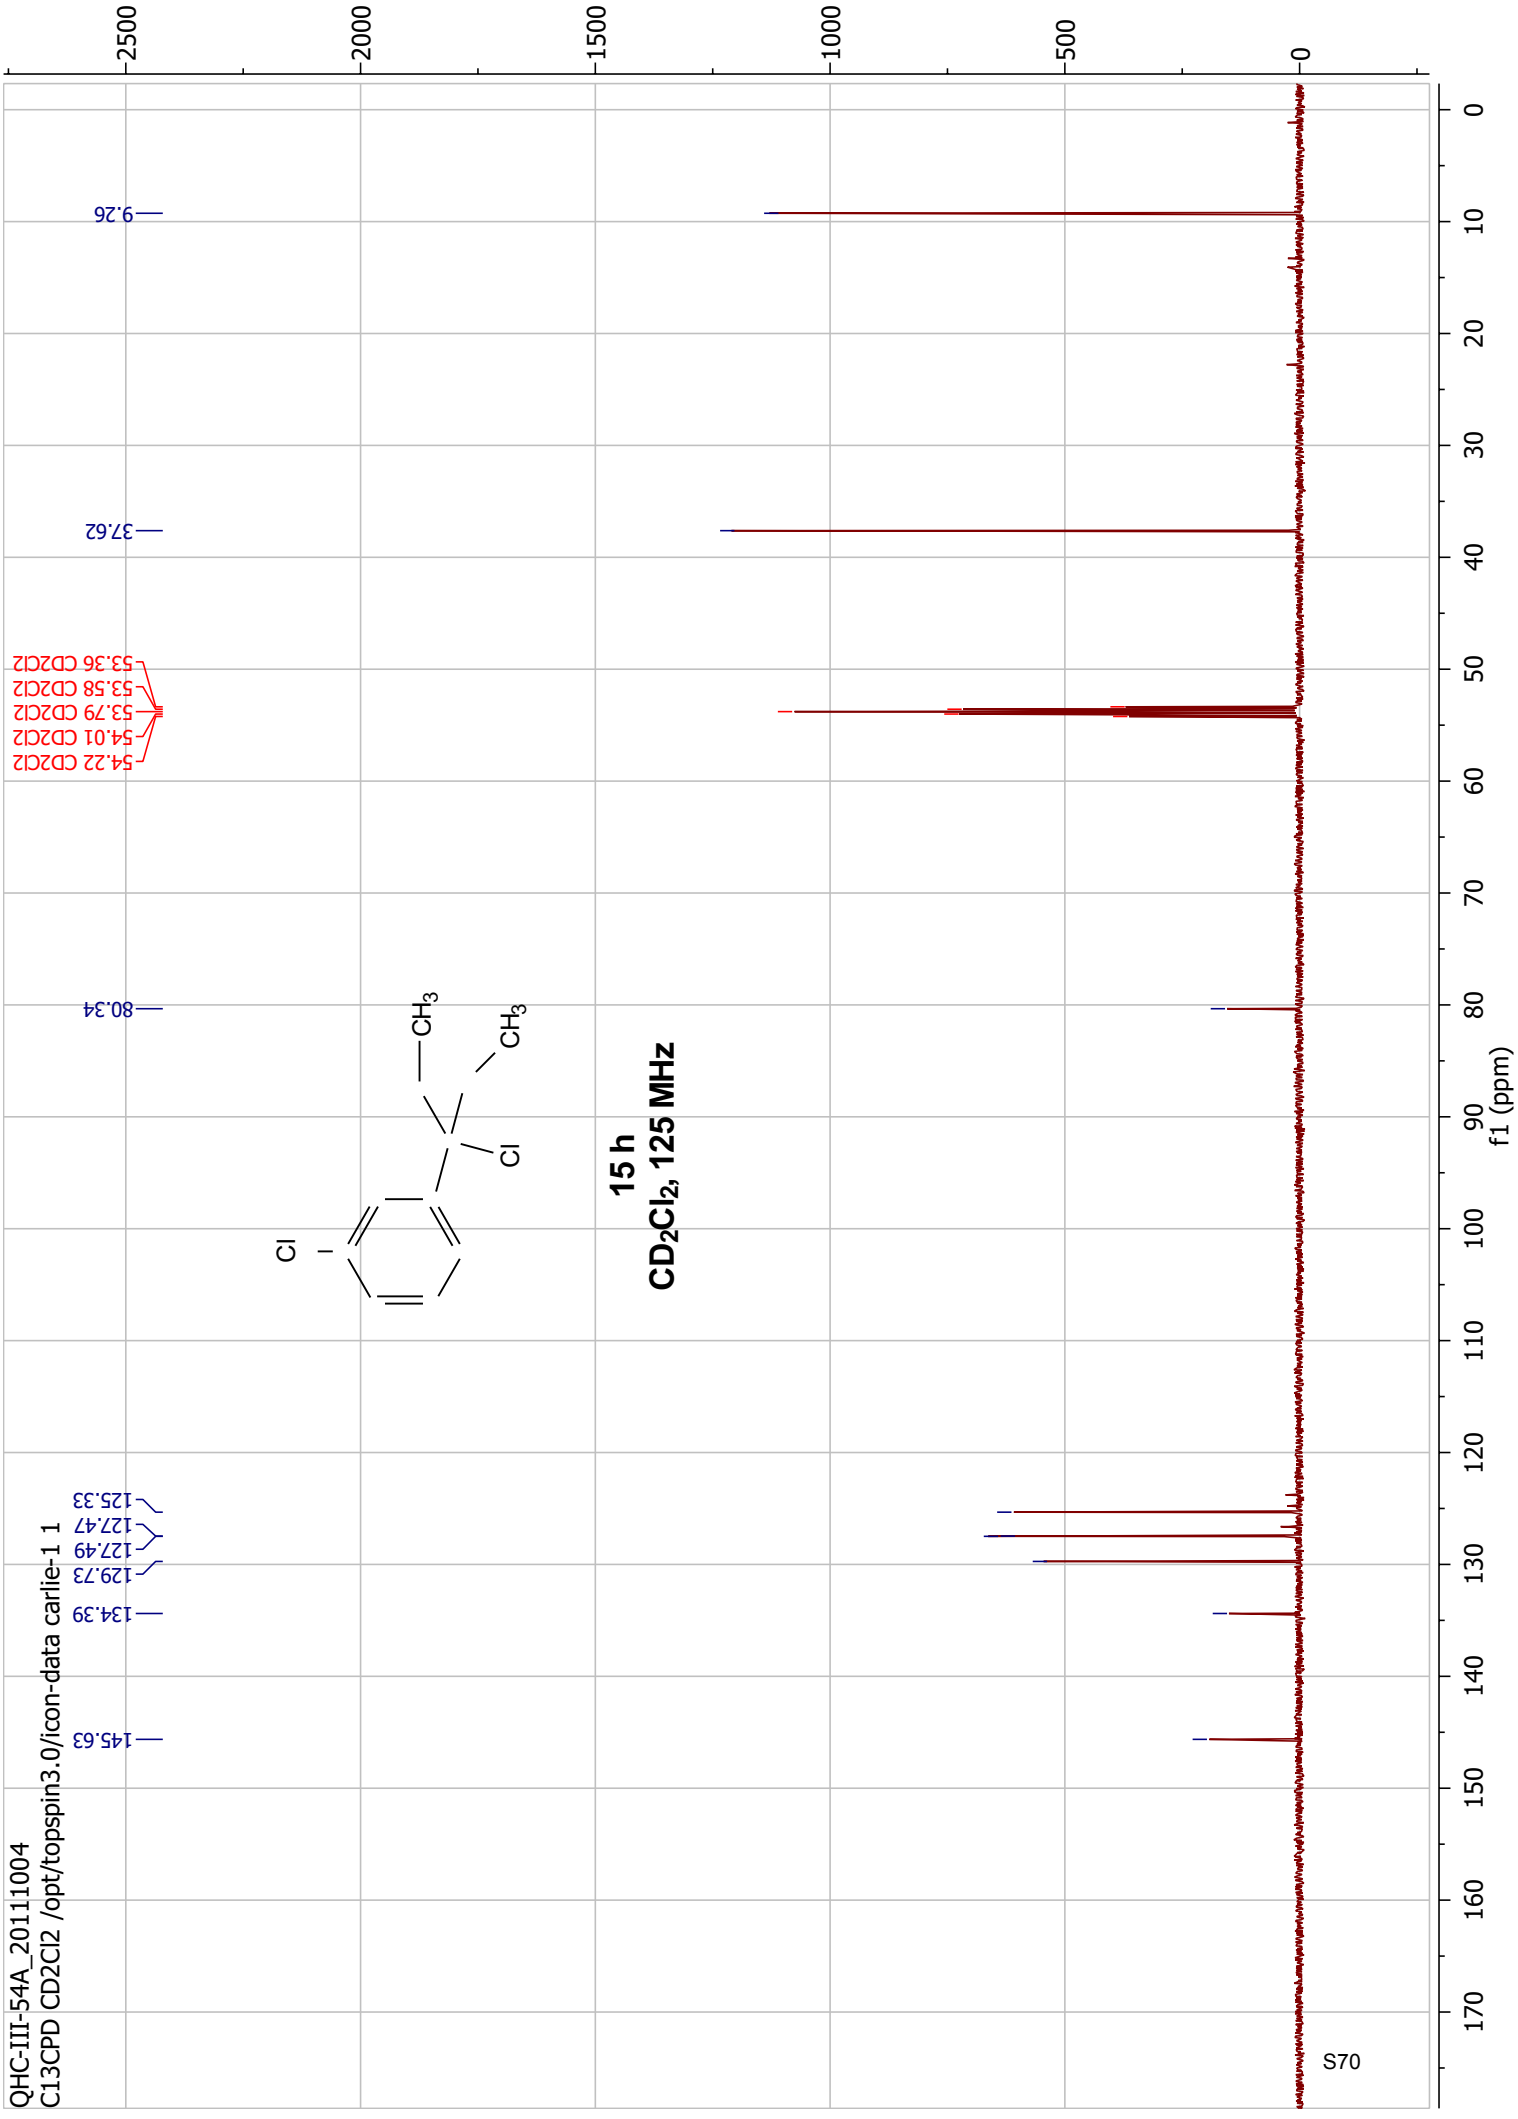

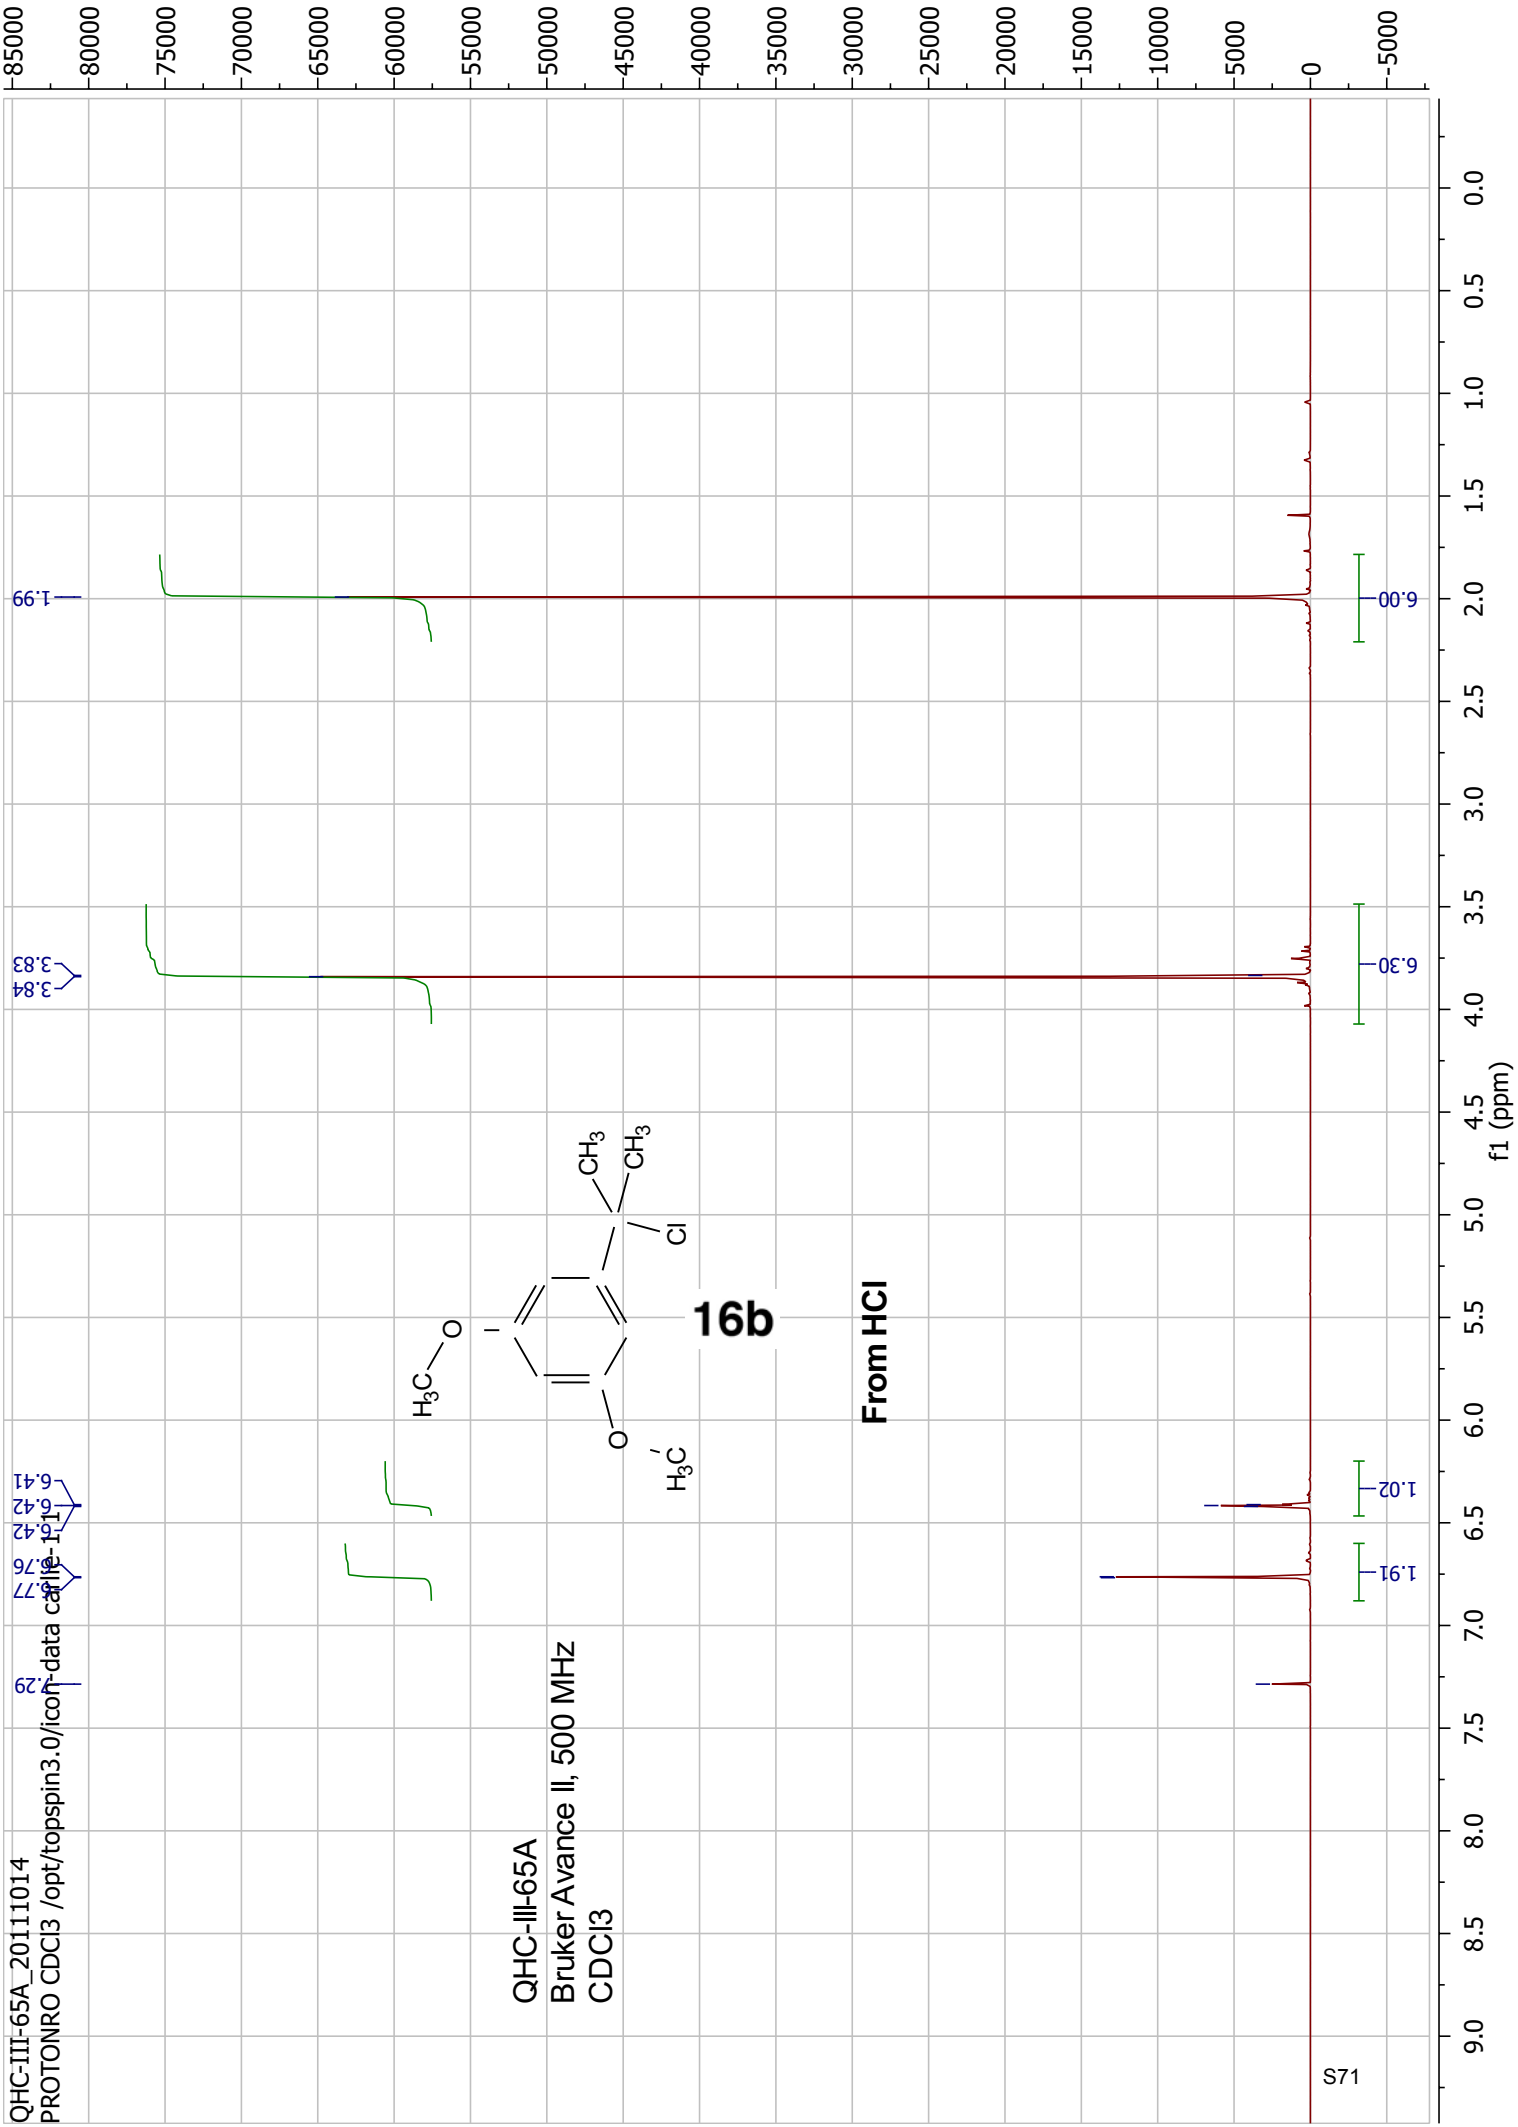

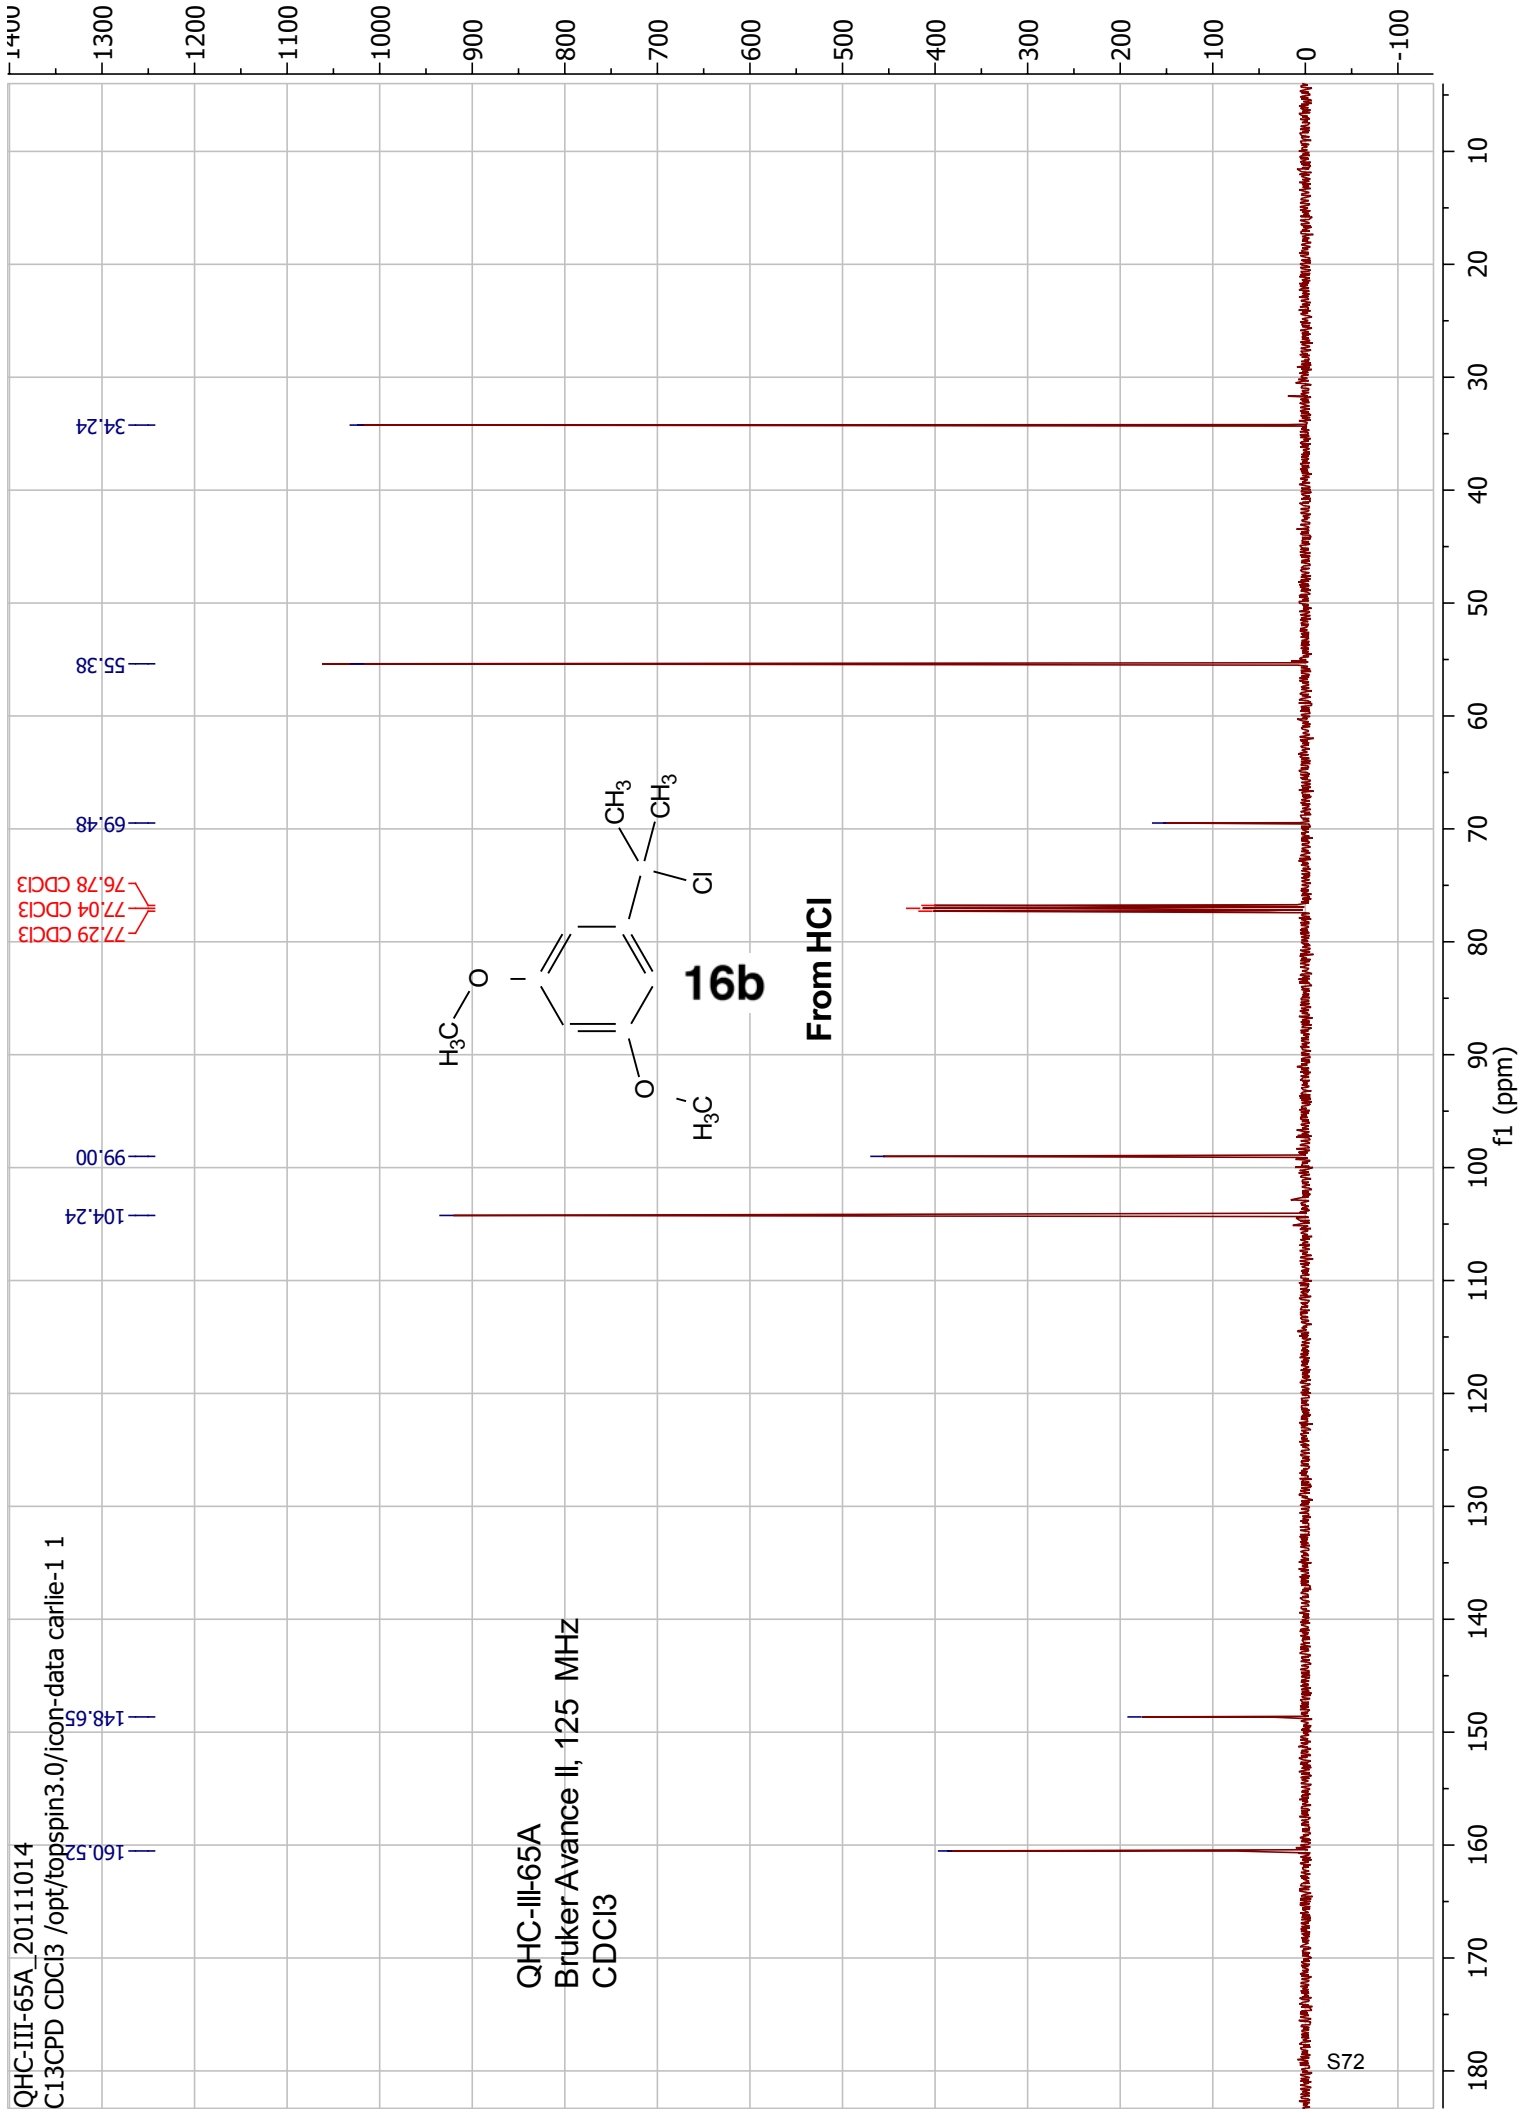

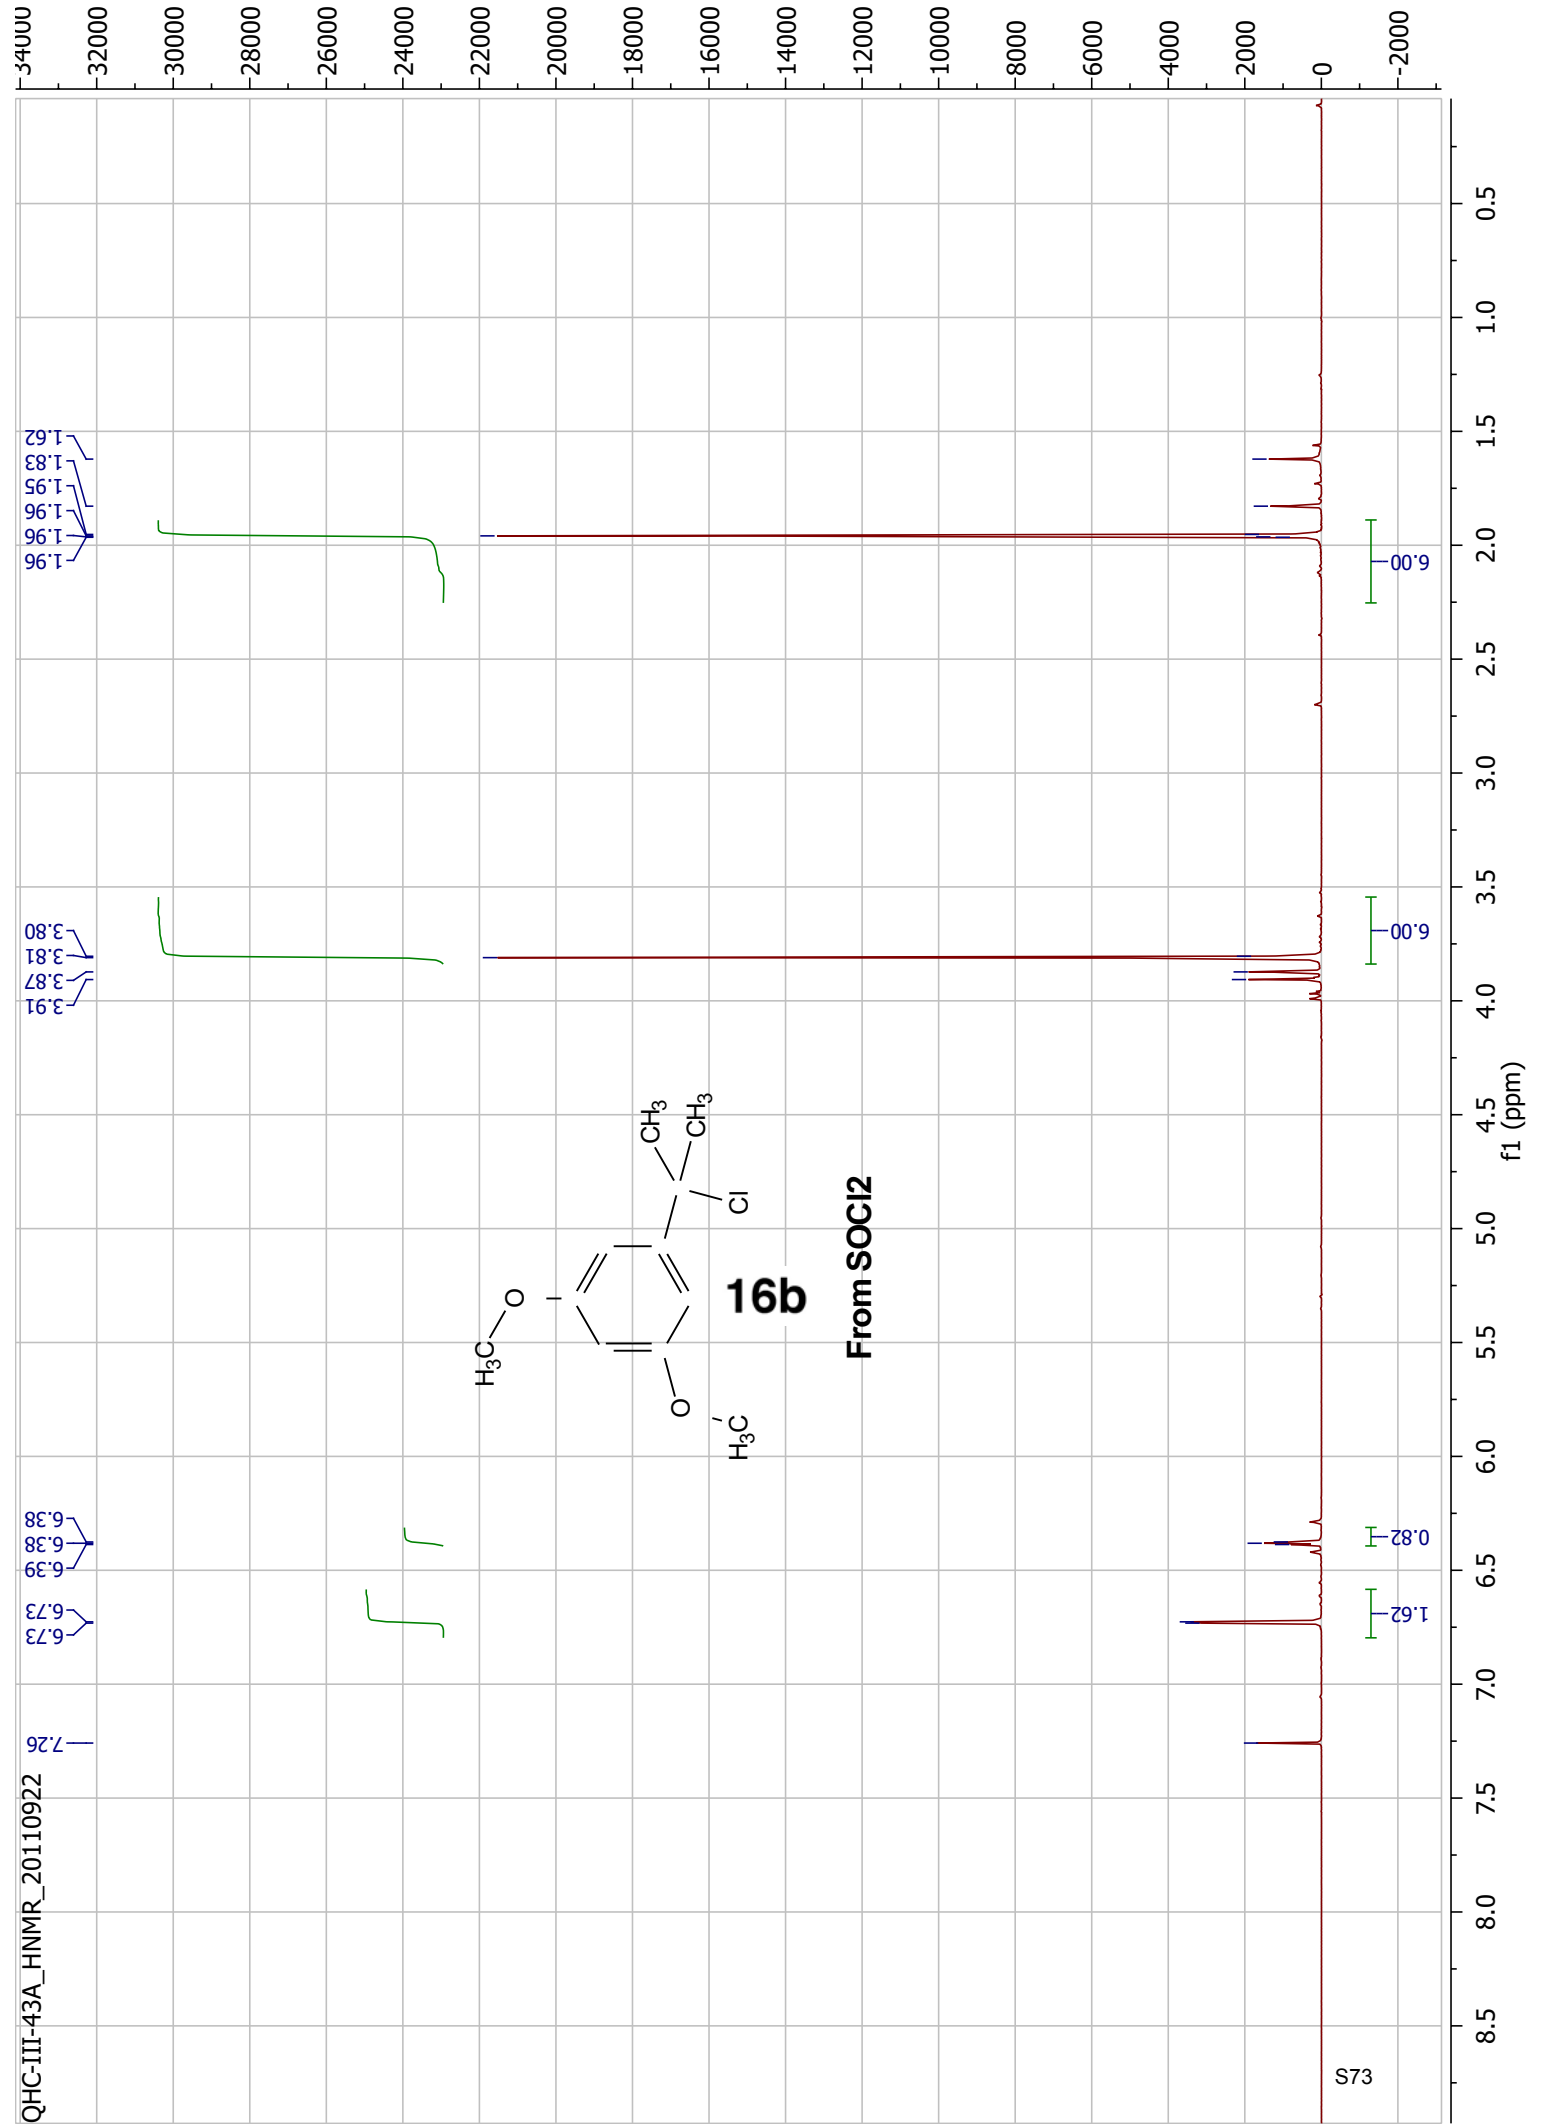

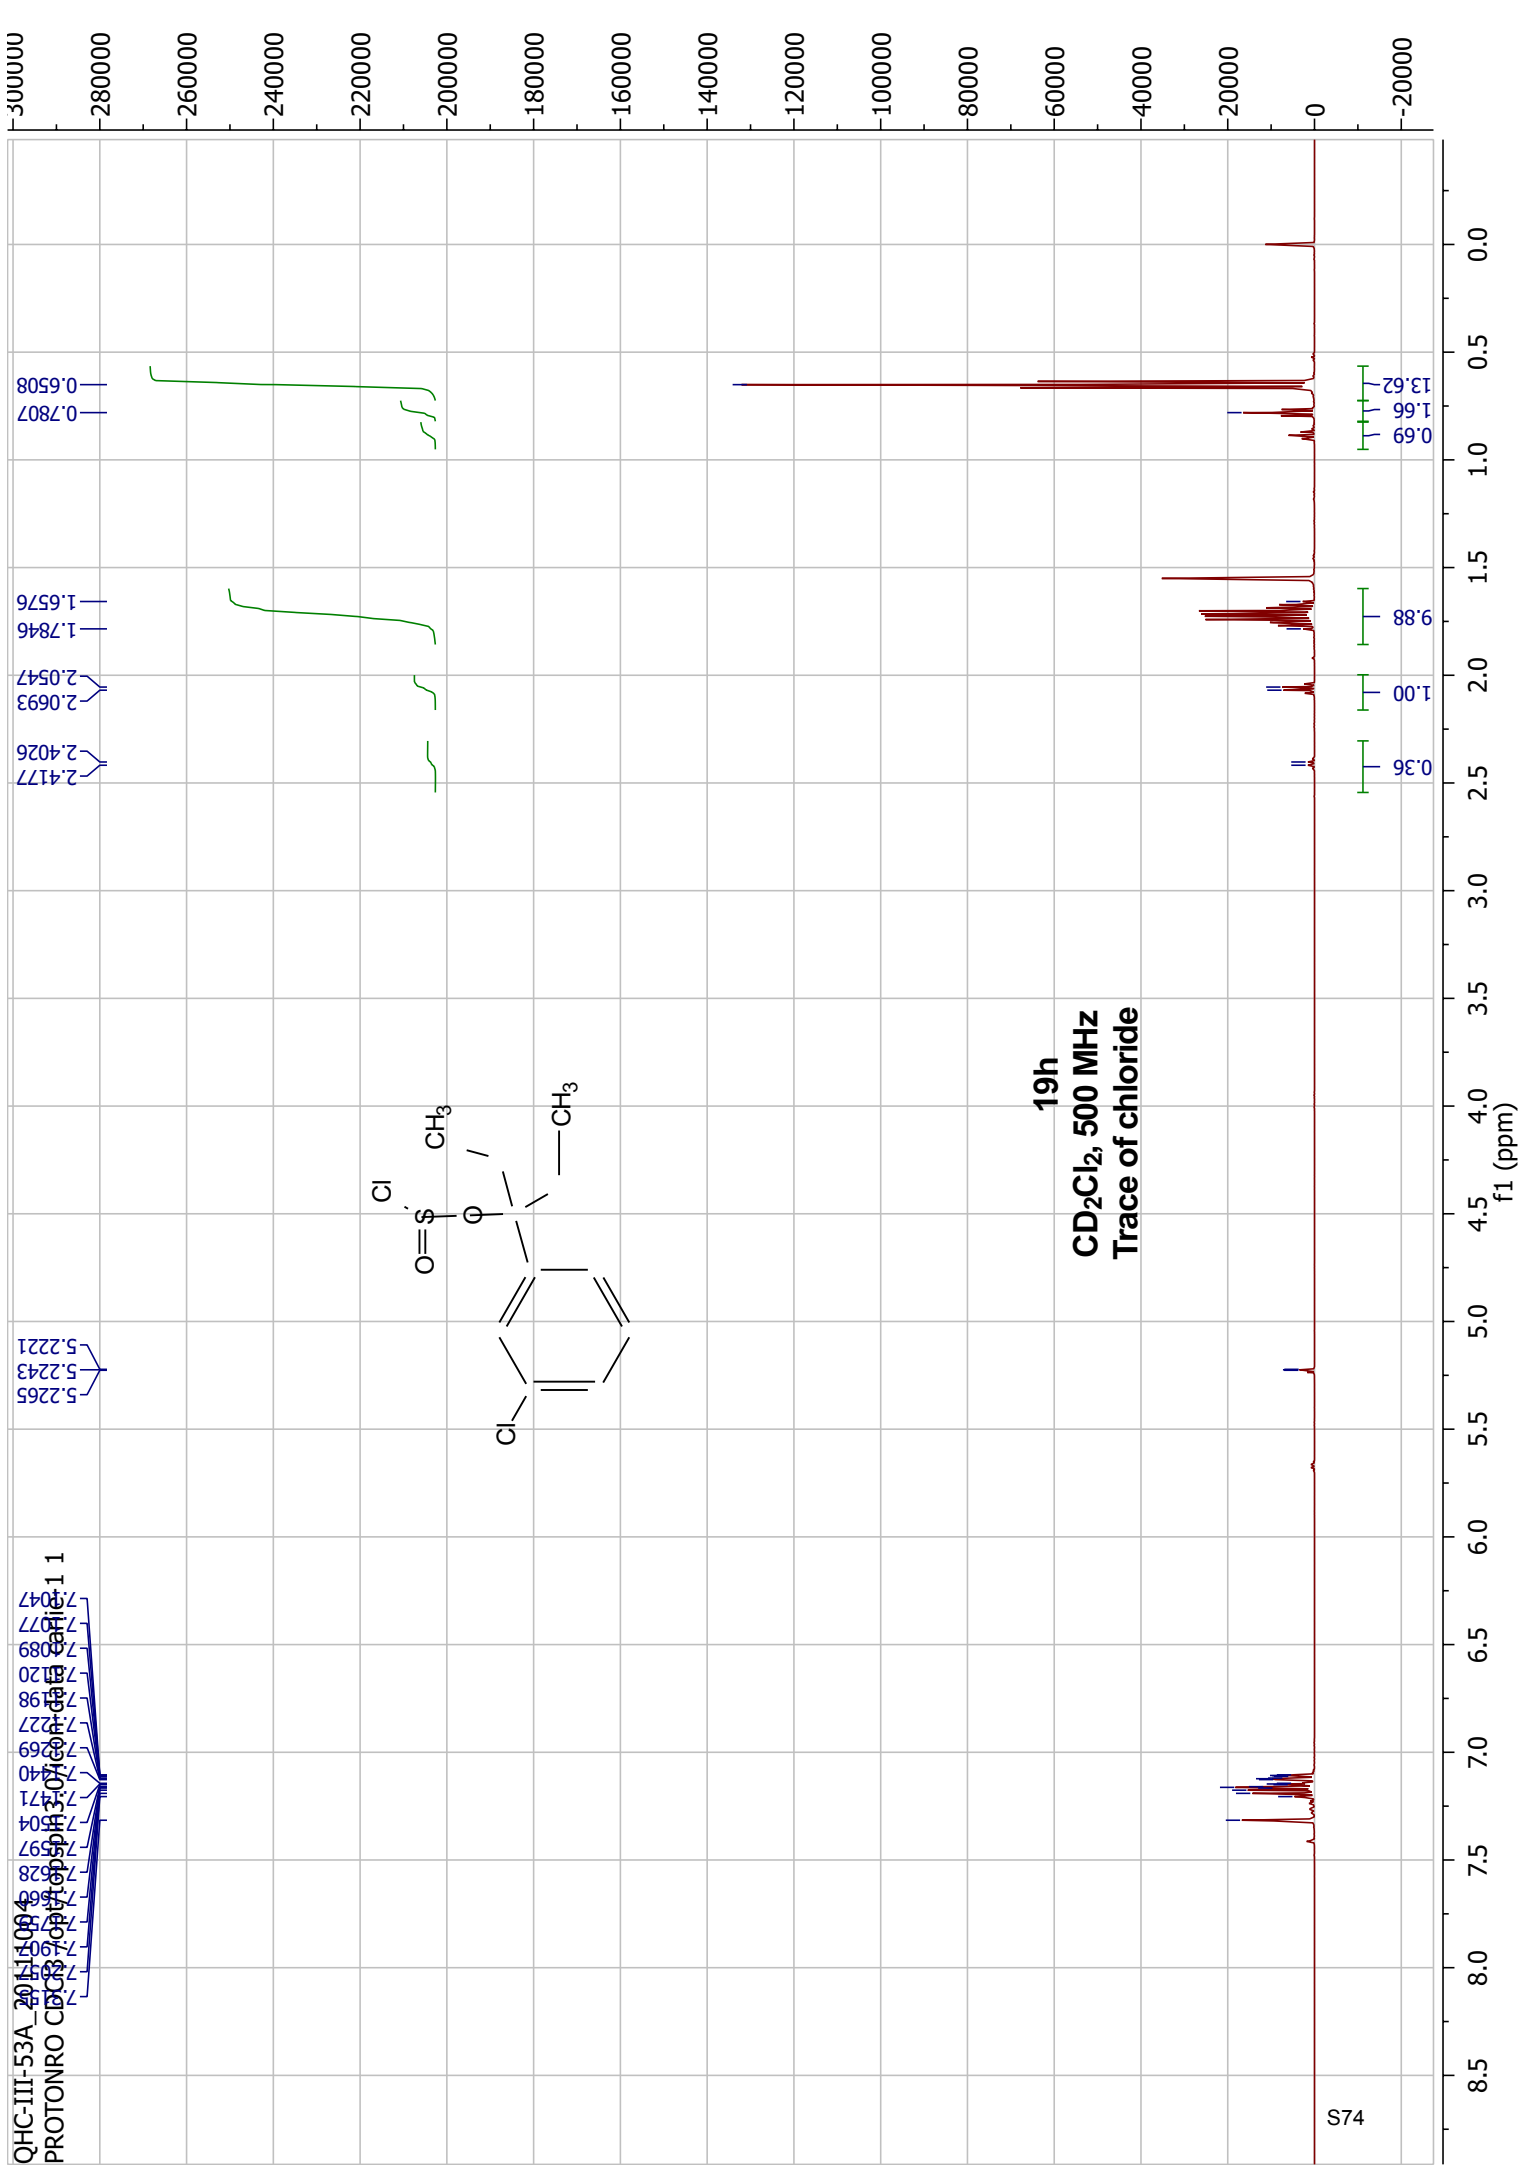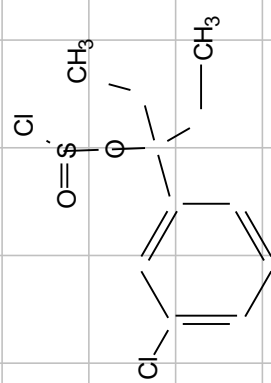

**19h**  
**CD<sub>2</sub>Cl<sub>2</sub>, 500 MHz**  
**Trace of chloride**

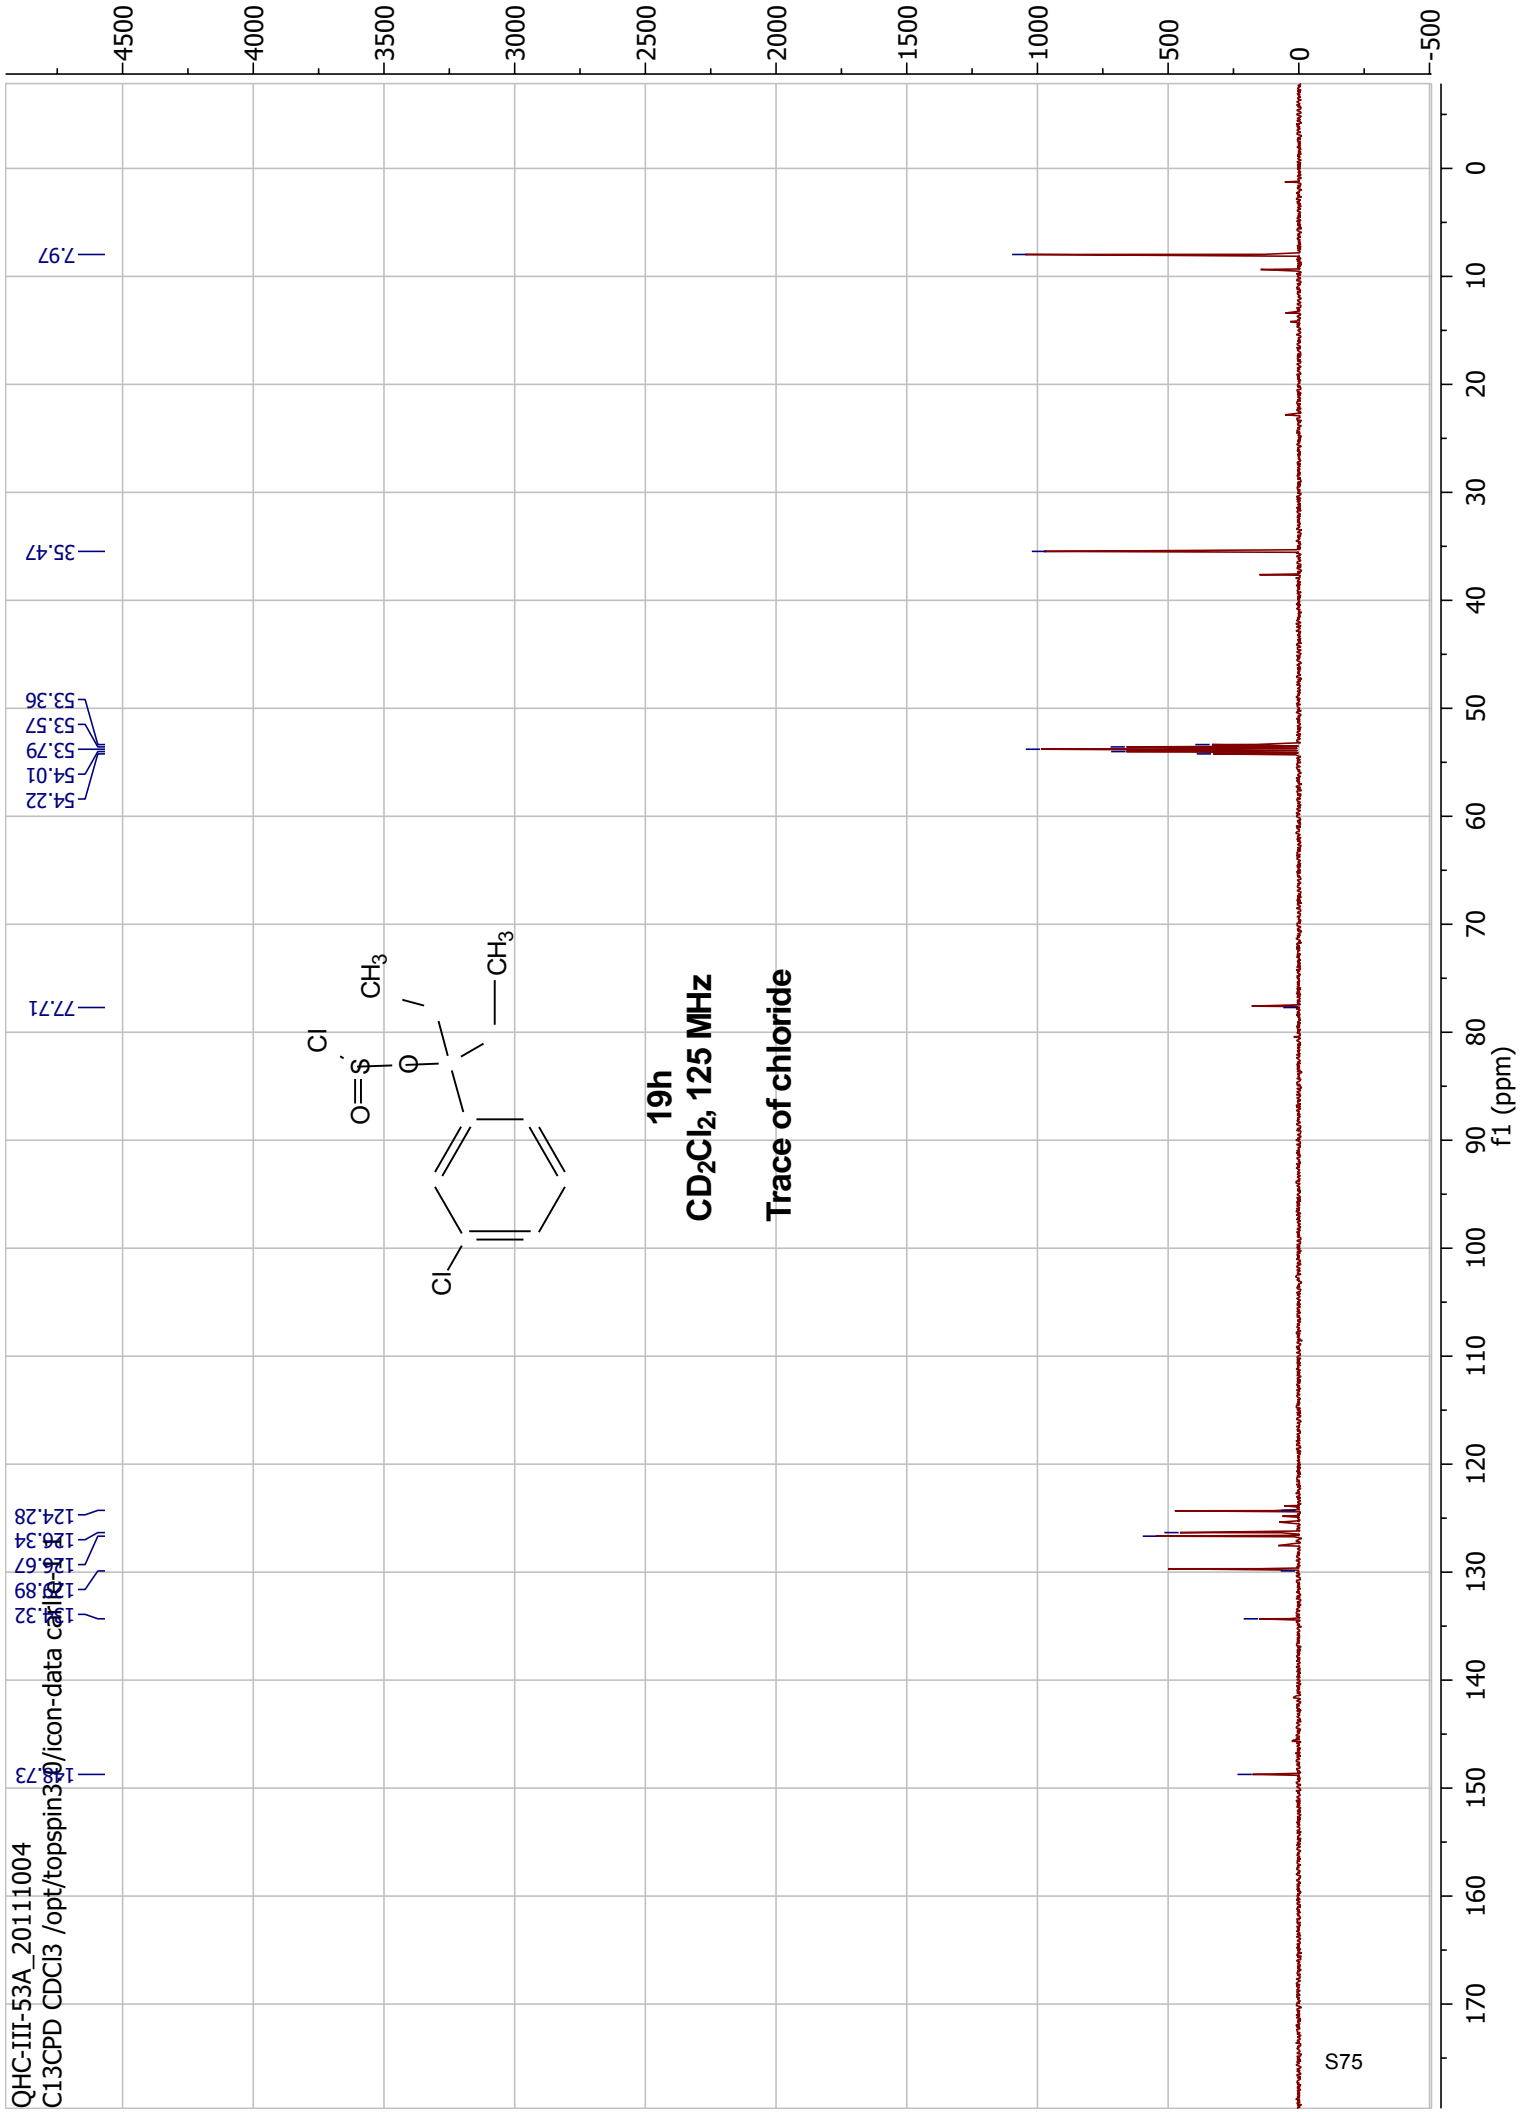



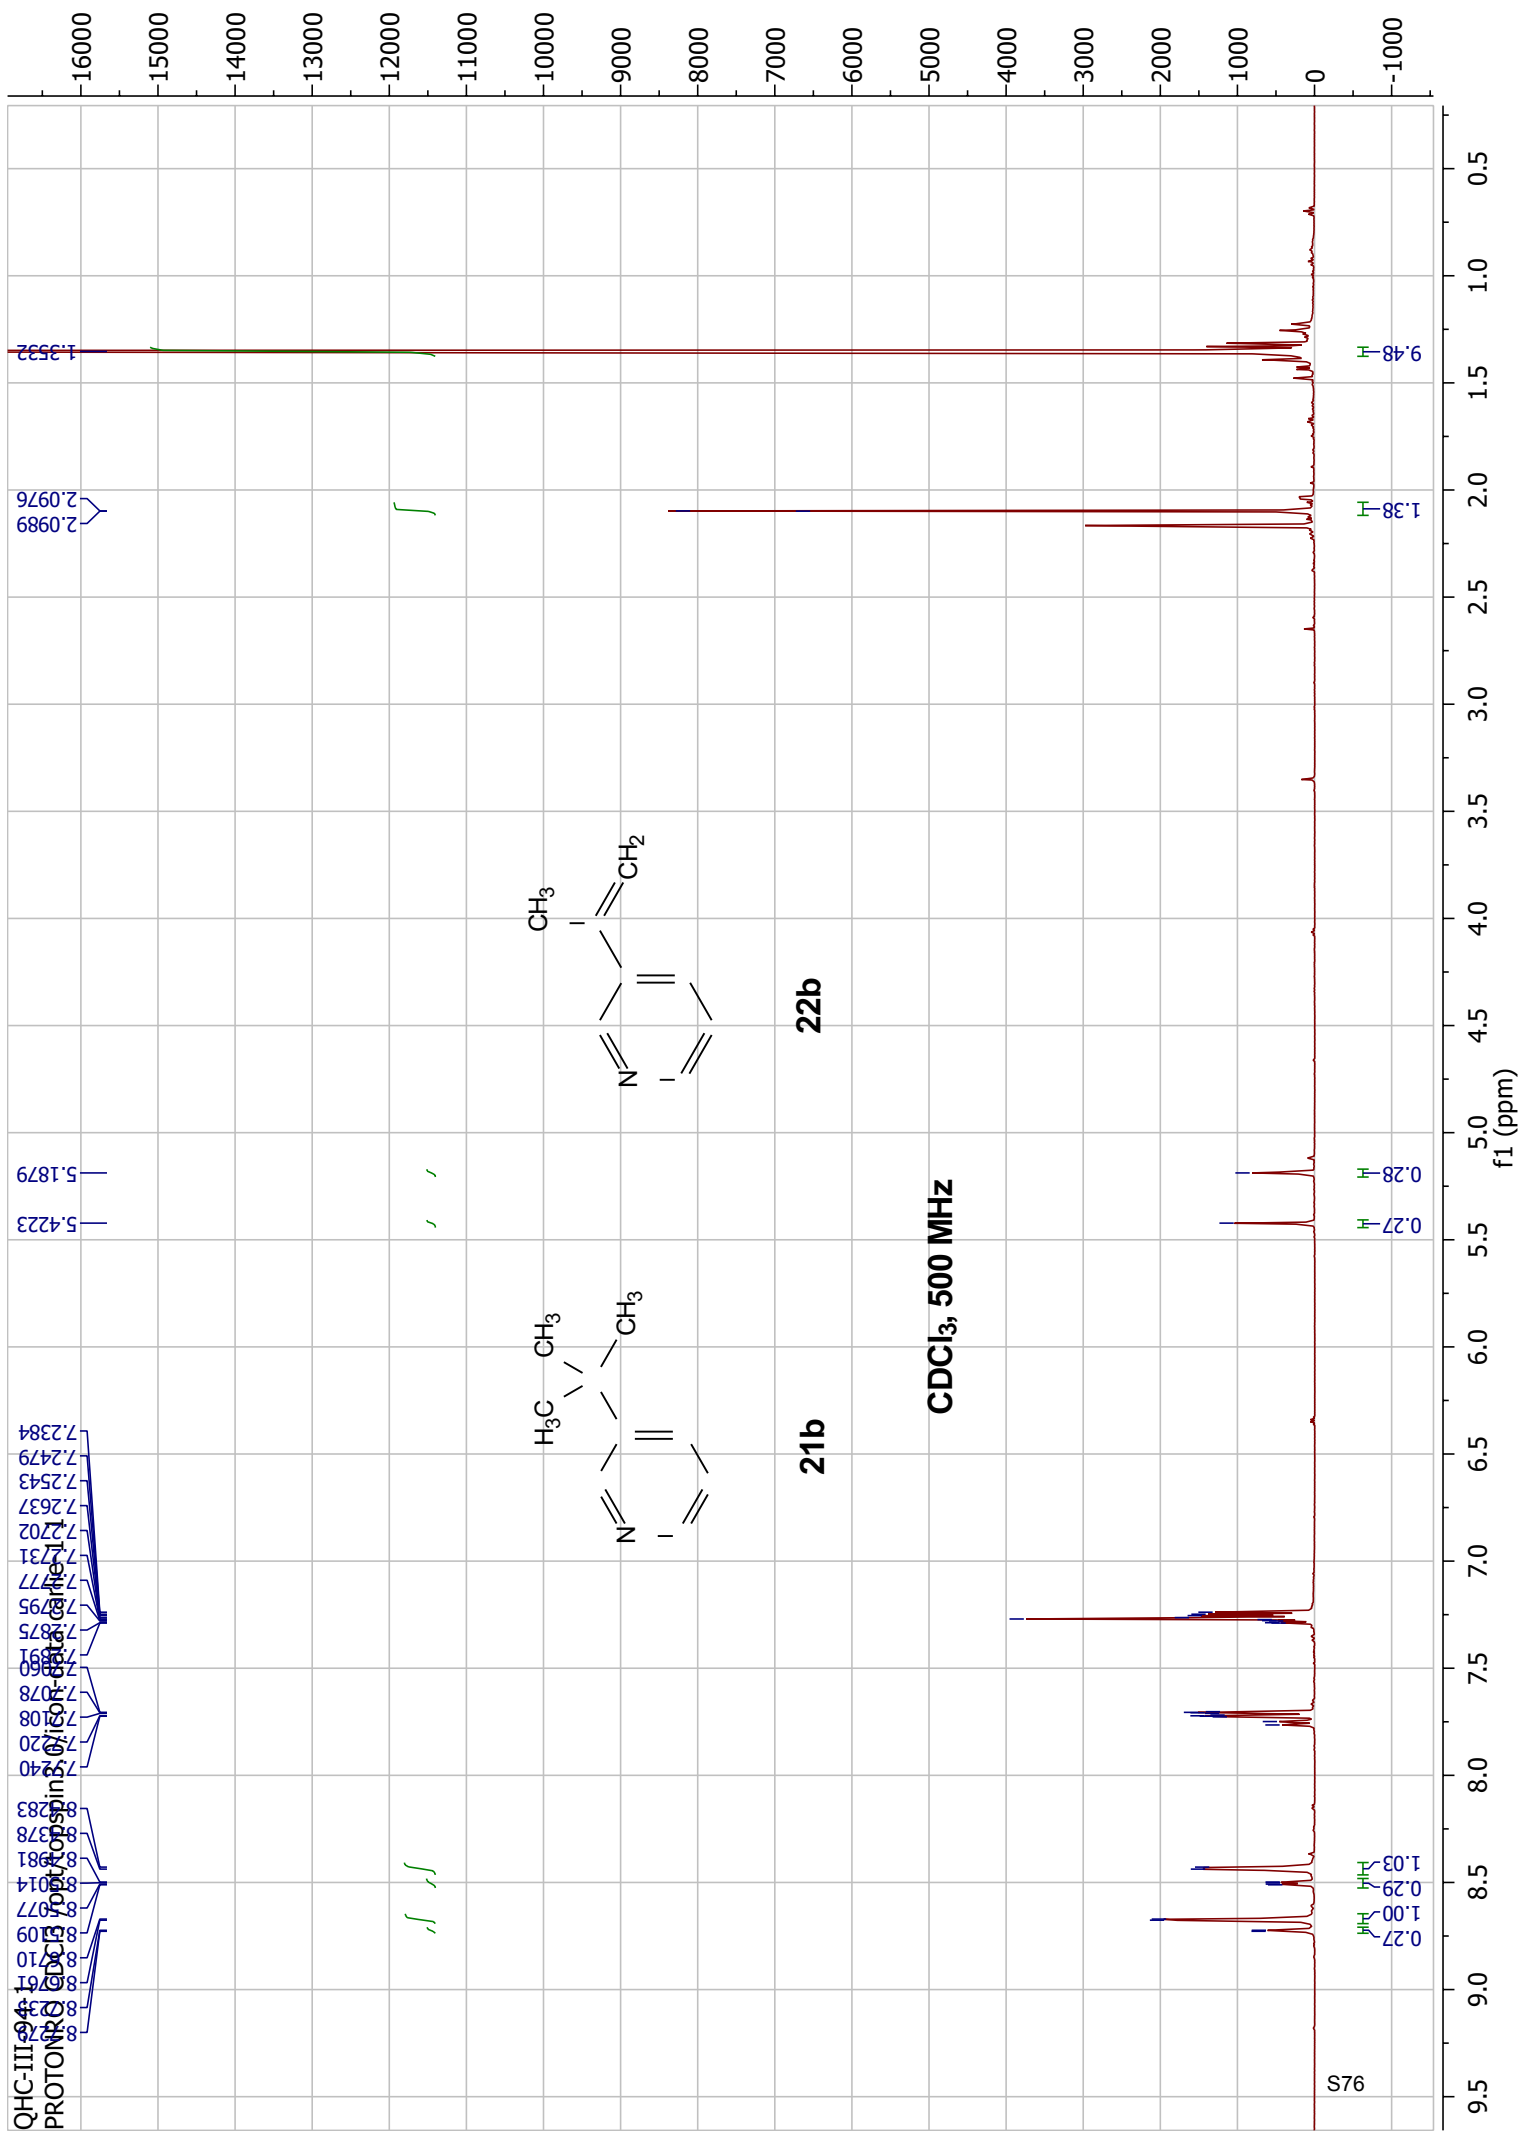

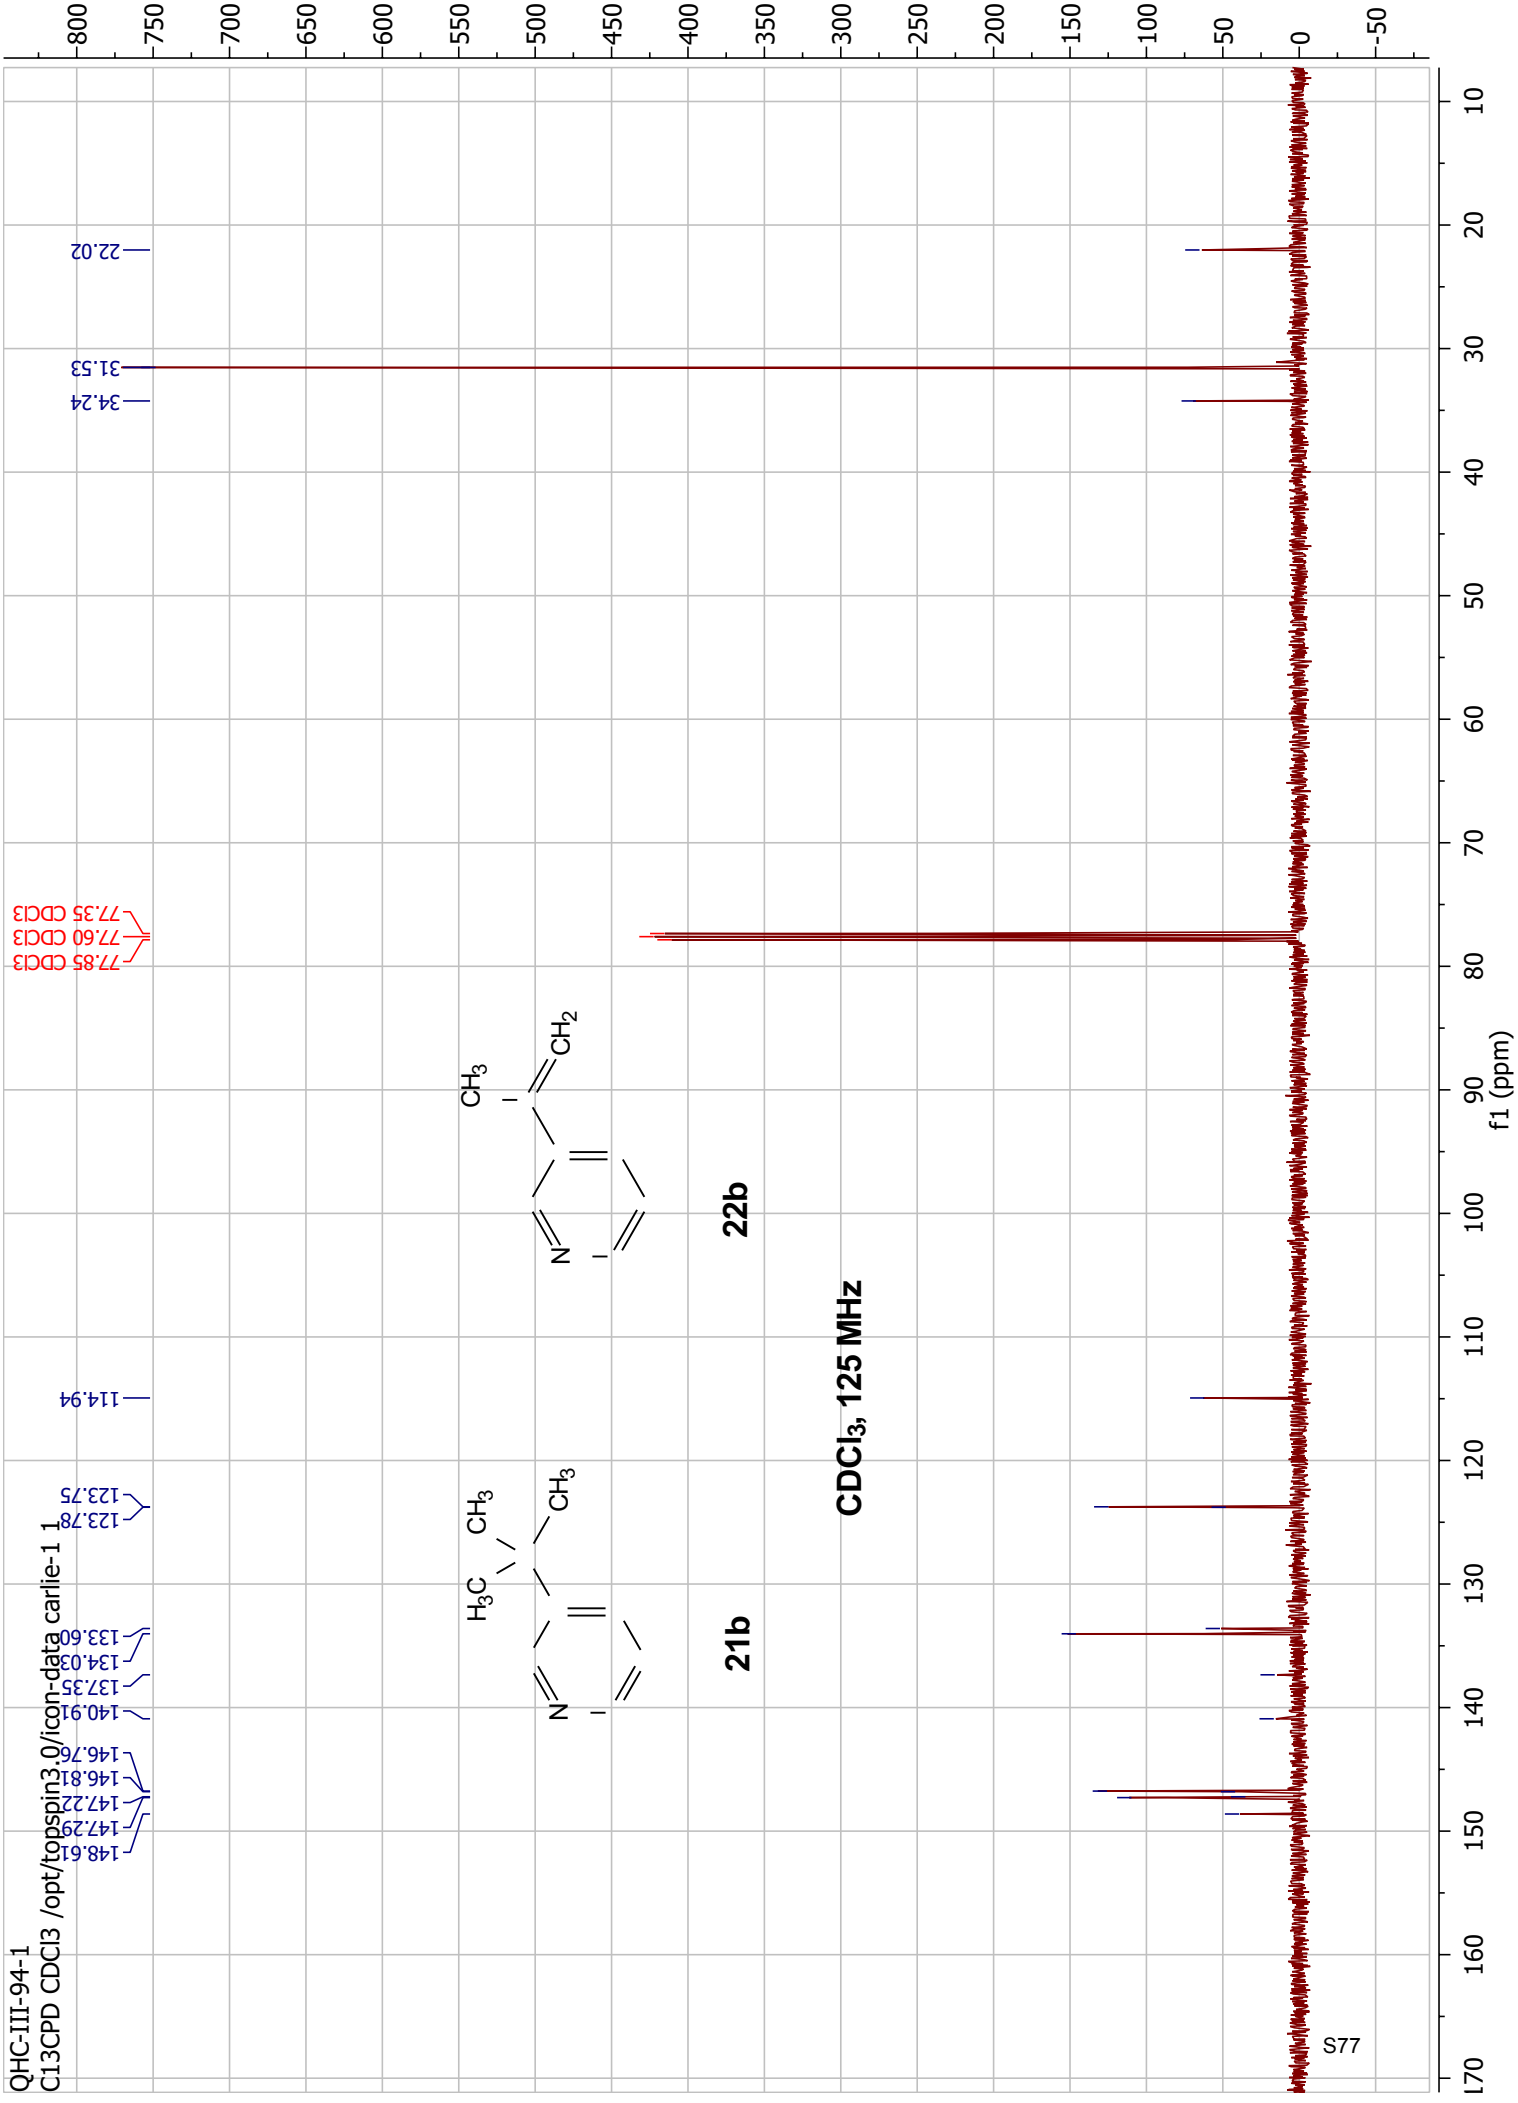

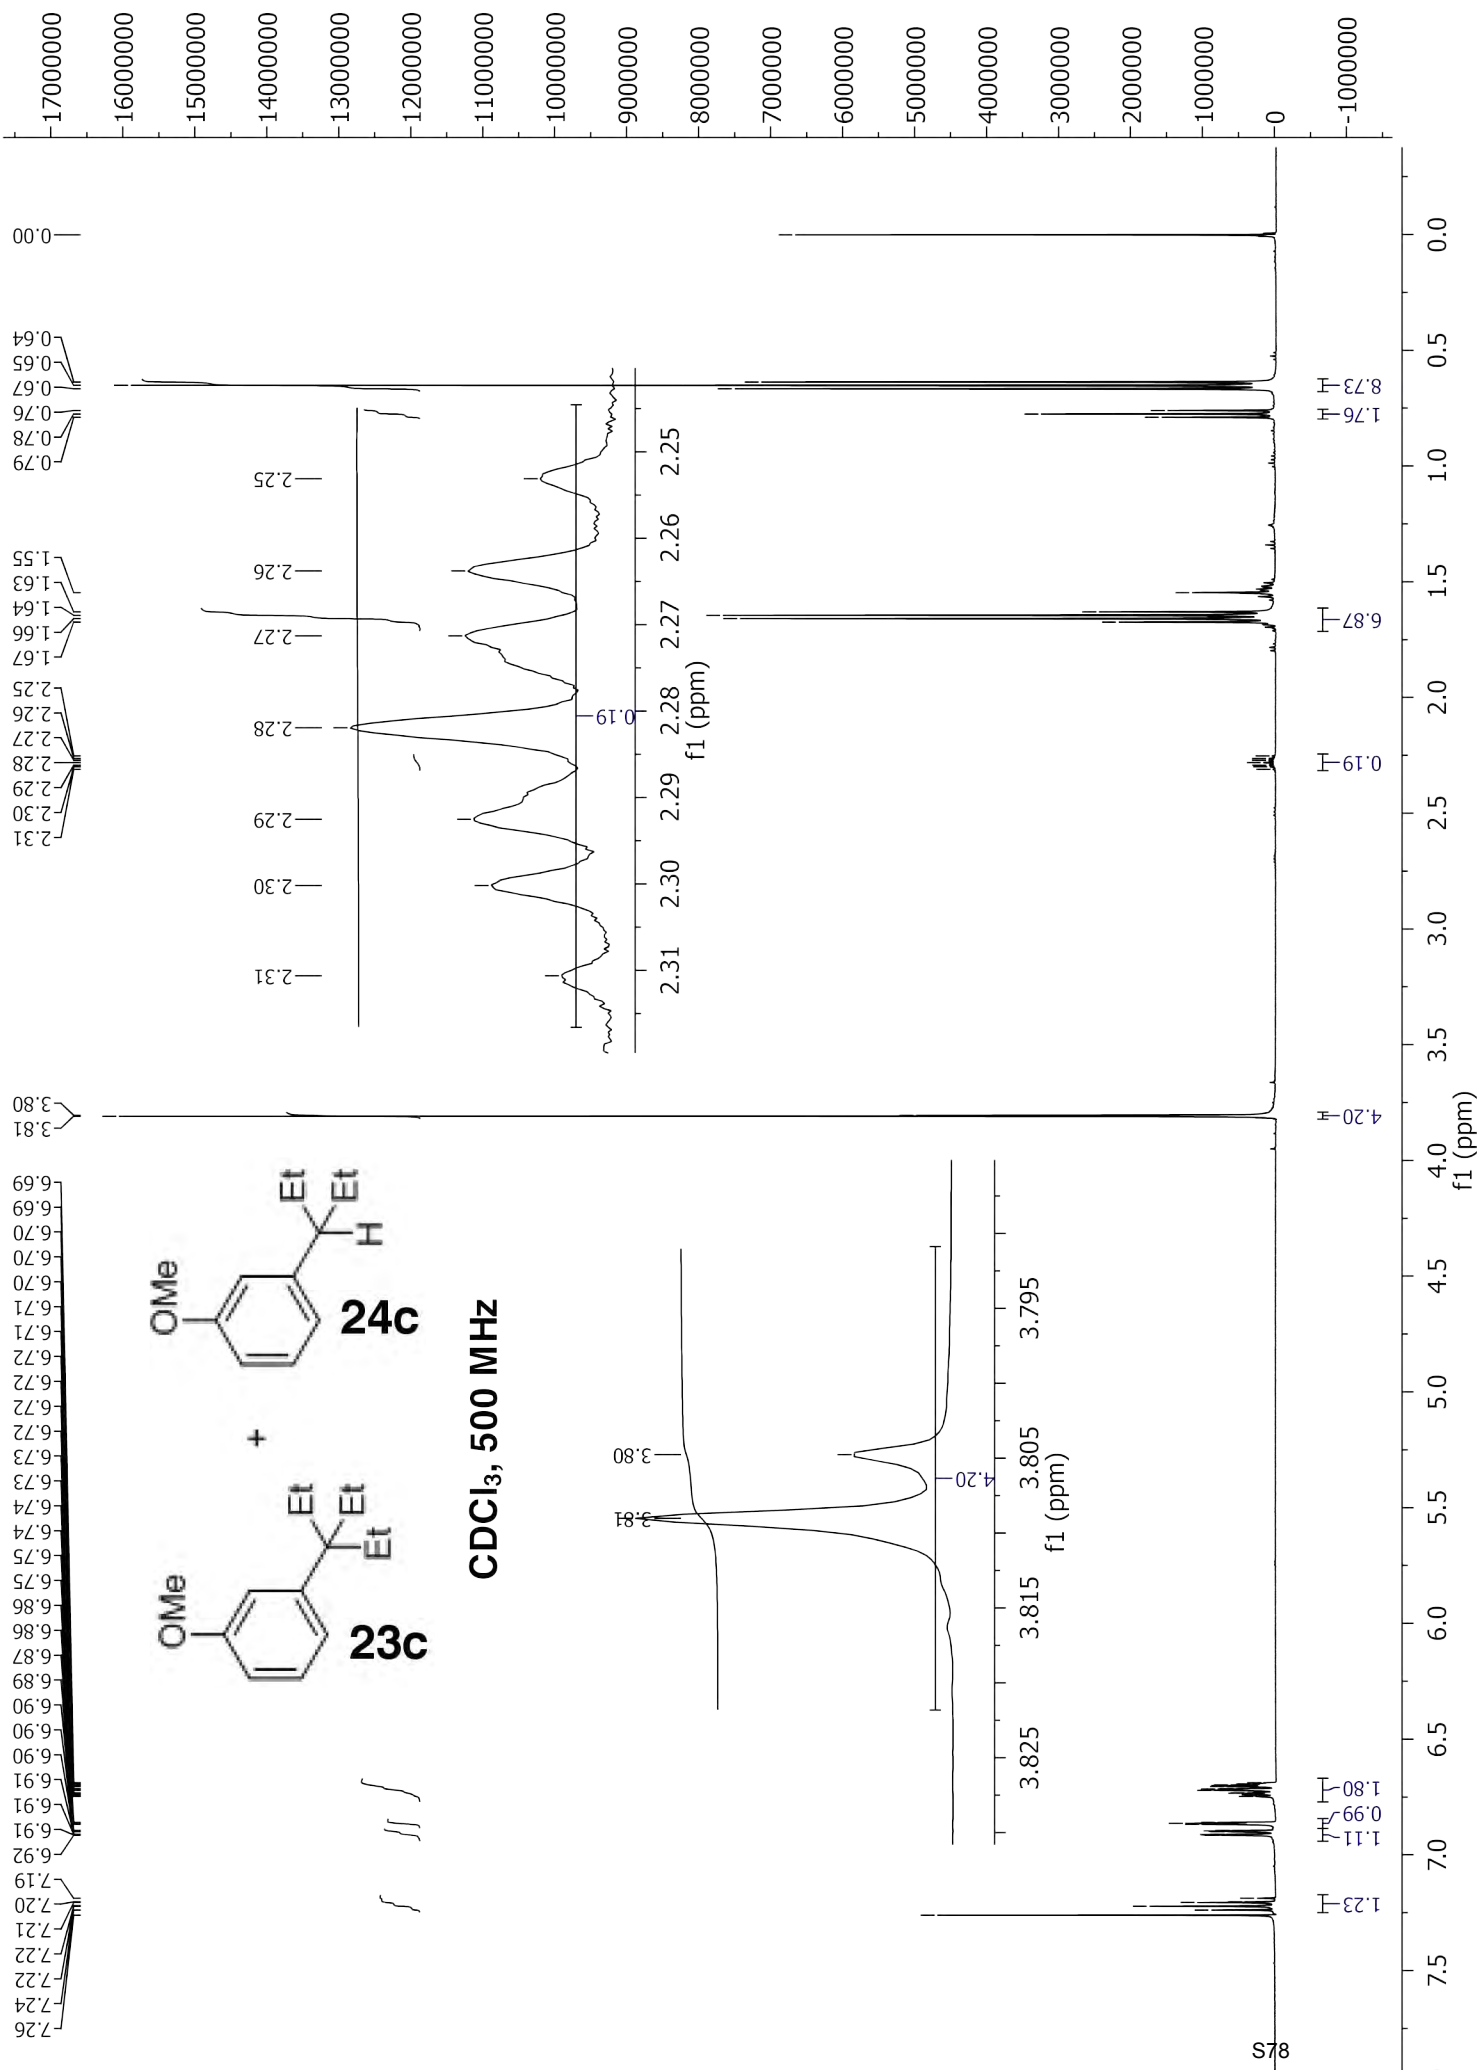

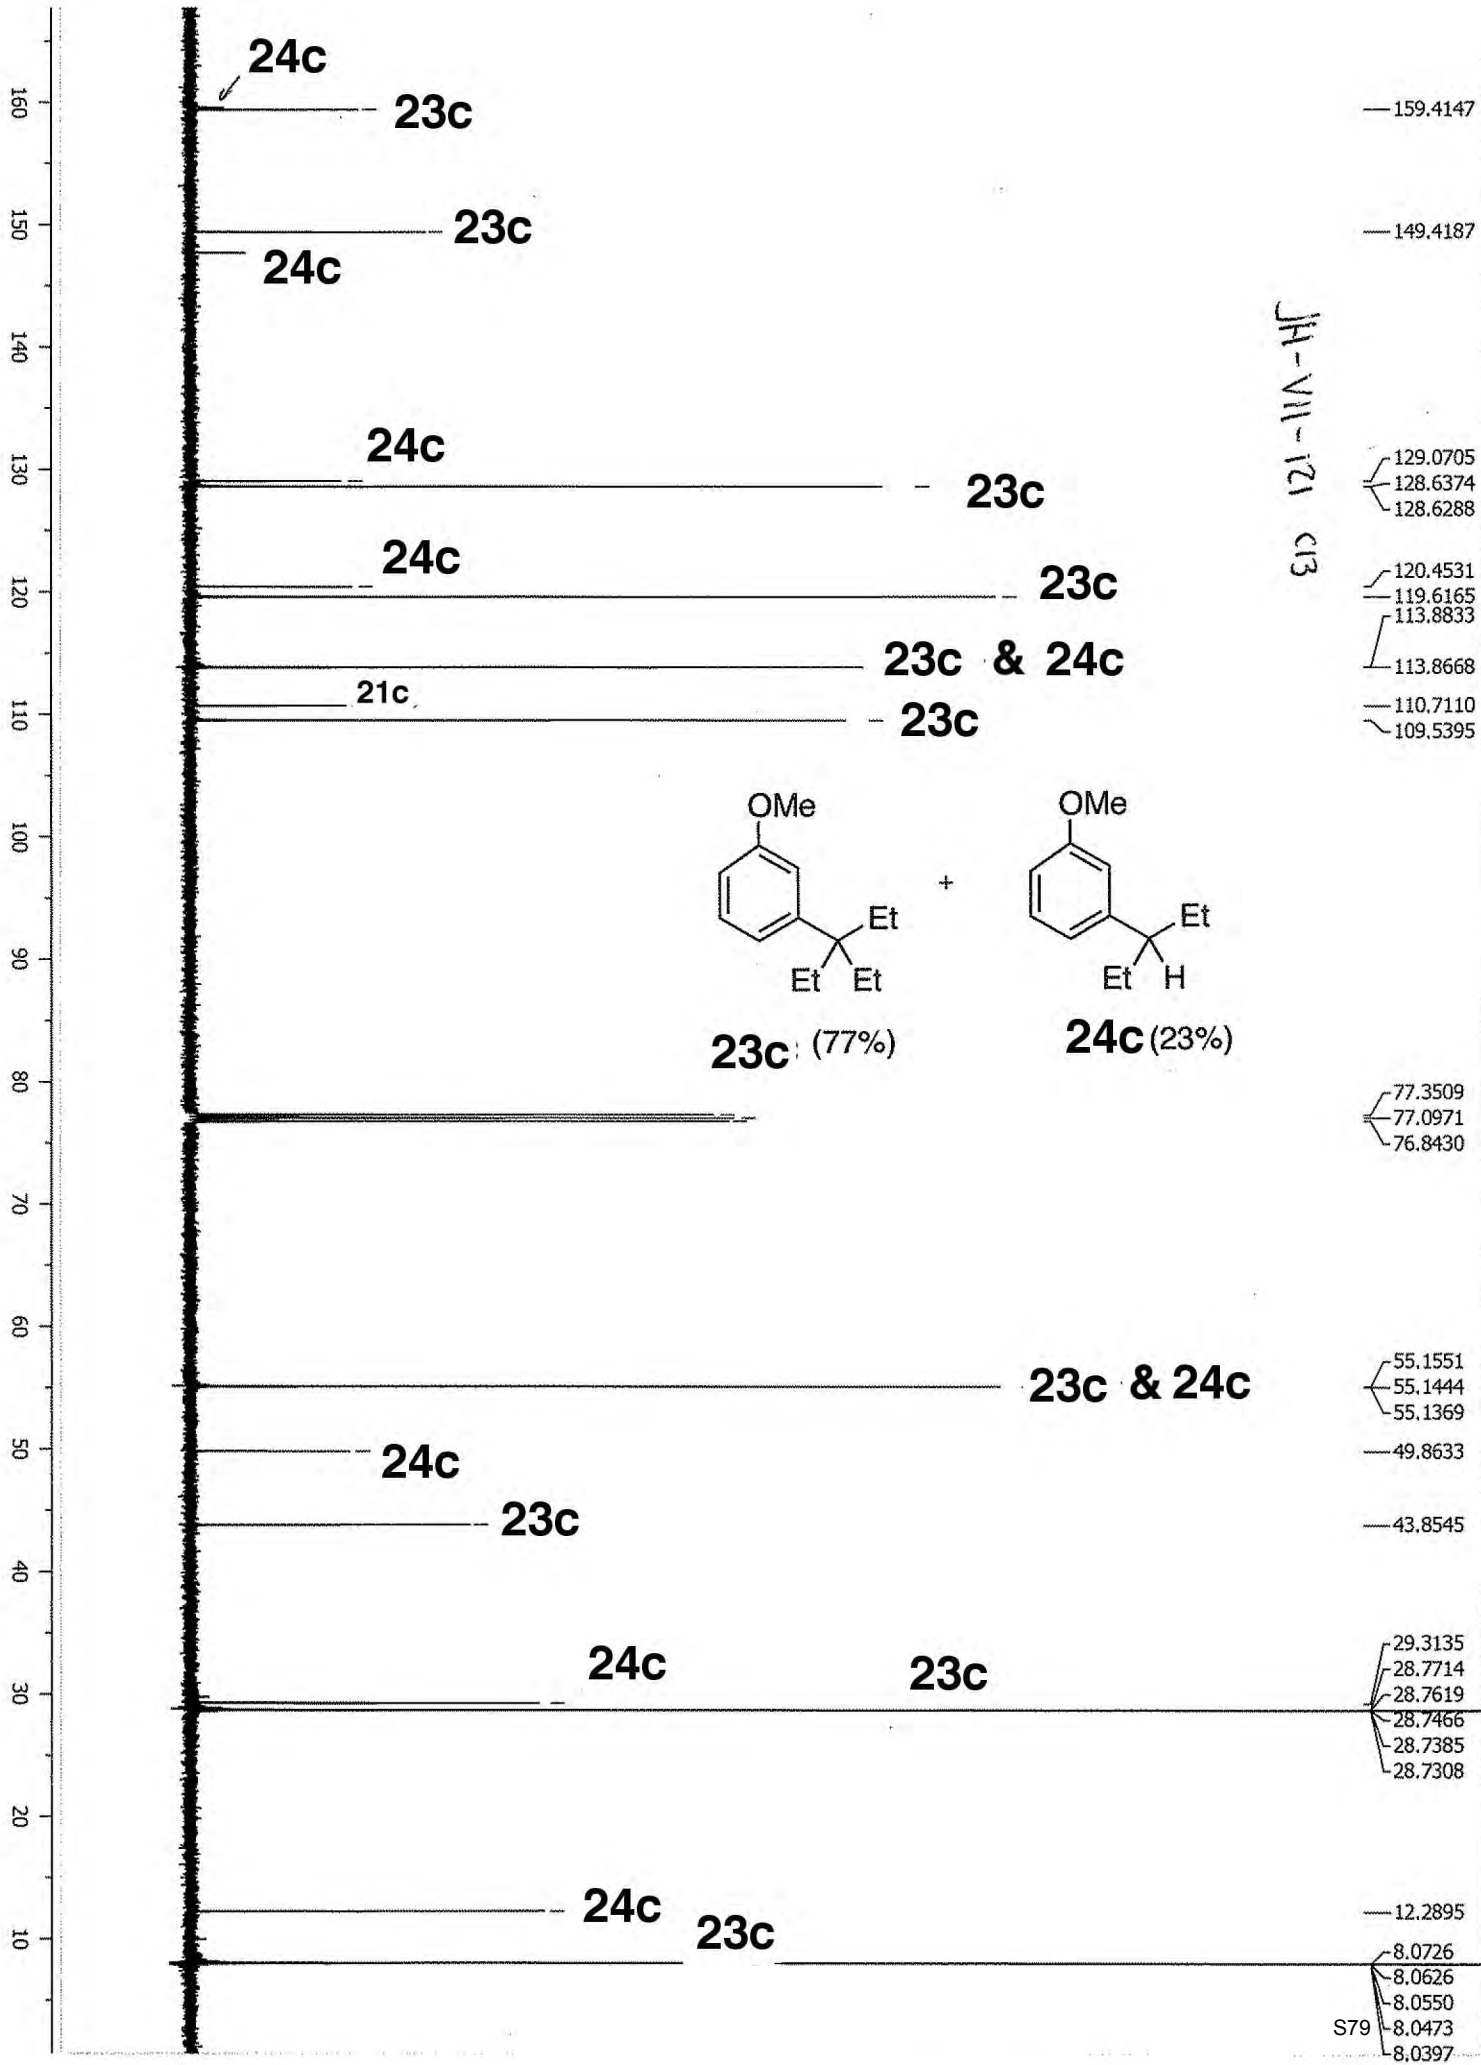

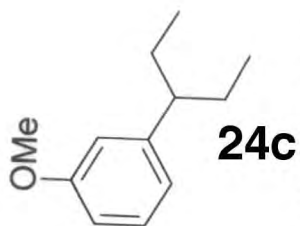

CDCl<sub>3</sub>, 500 MHz

0.8043  
 0.7895  
 0.7747  
 1.5197  
 1.5374  
 1.5497  
 1.5645  
 1.5827  
 1.6605  
 1.6846  
 2.2780  
 2.2873  
 2.2960  
 2.3060  
 2.3140

3.8077

6.7118  
 6.7290  
 6.7300  
 6.7321  
 6.7339  
 6.7449  
 6.7479  
 6.7498  
 6.7534  
 6.7594  
 7.1960  
 7.2120  
 7.2273

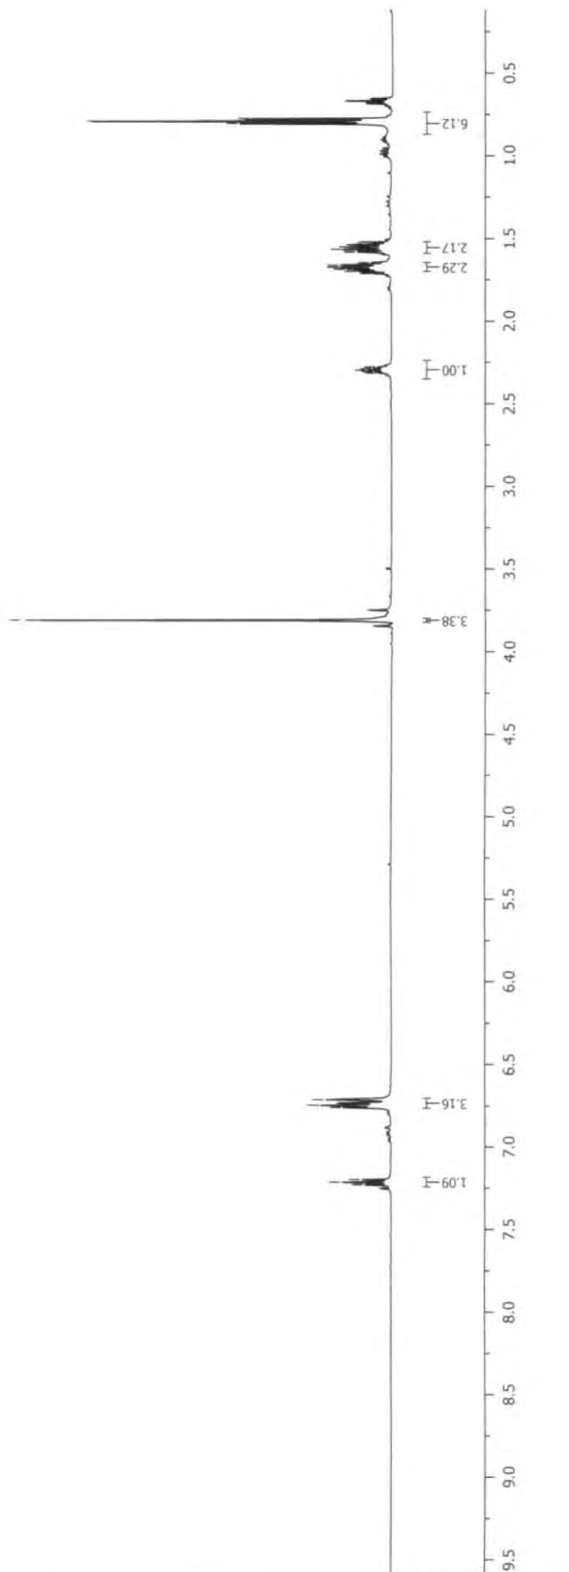

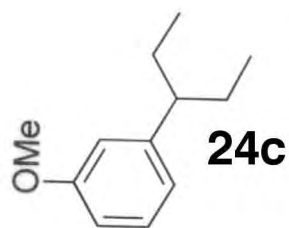

**CDCl<sub>3</sub>, 125 MHz**

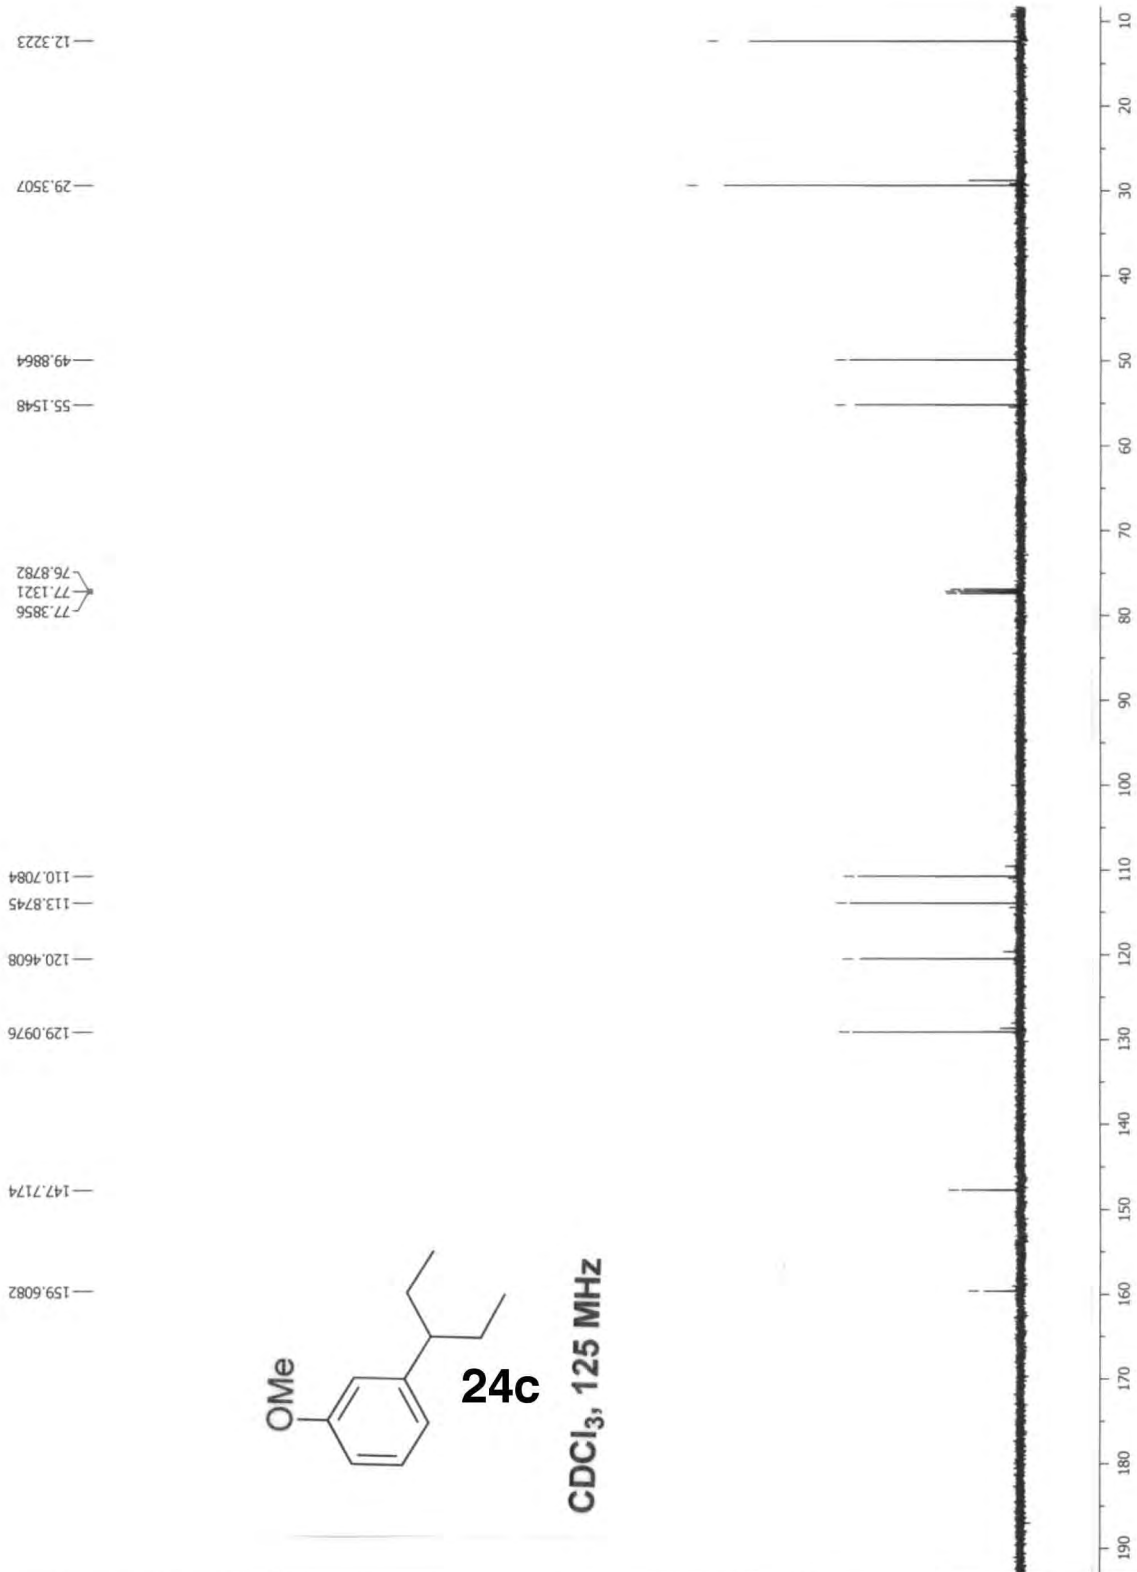

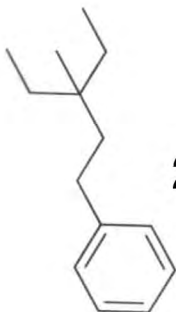

**26**

**CDCl<sub>3</sub>, 500 MHz**

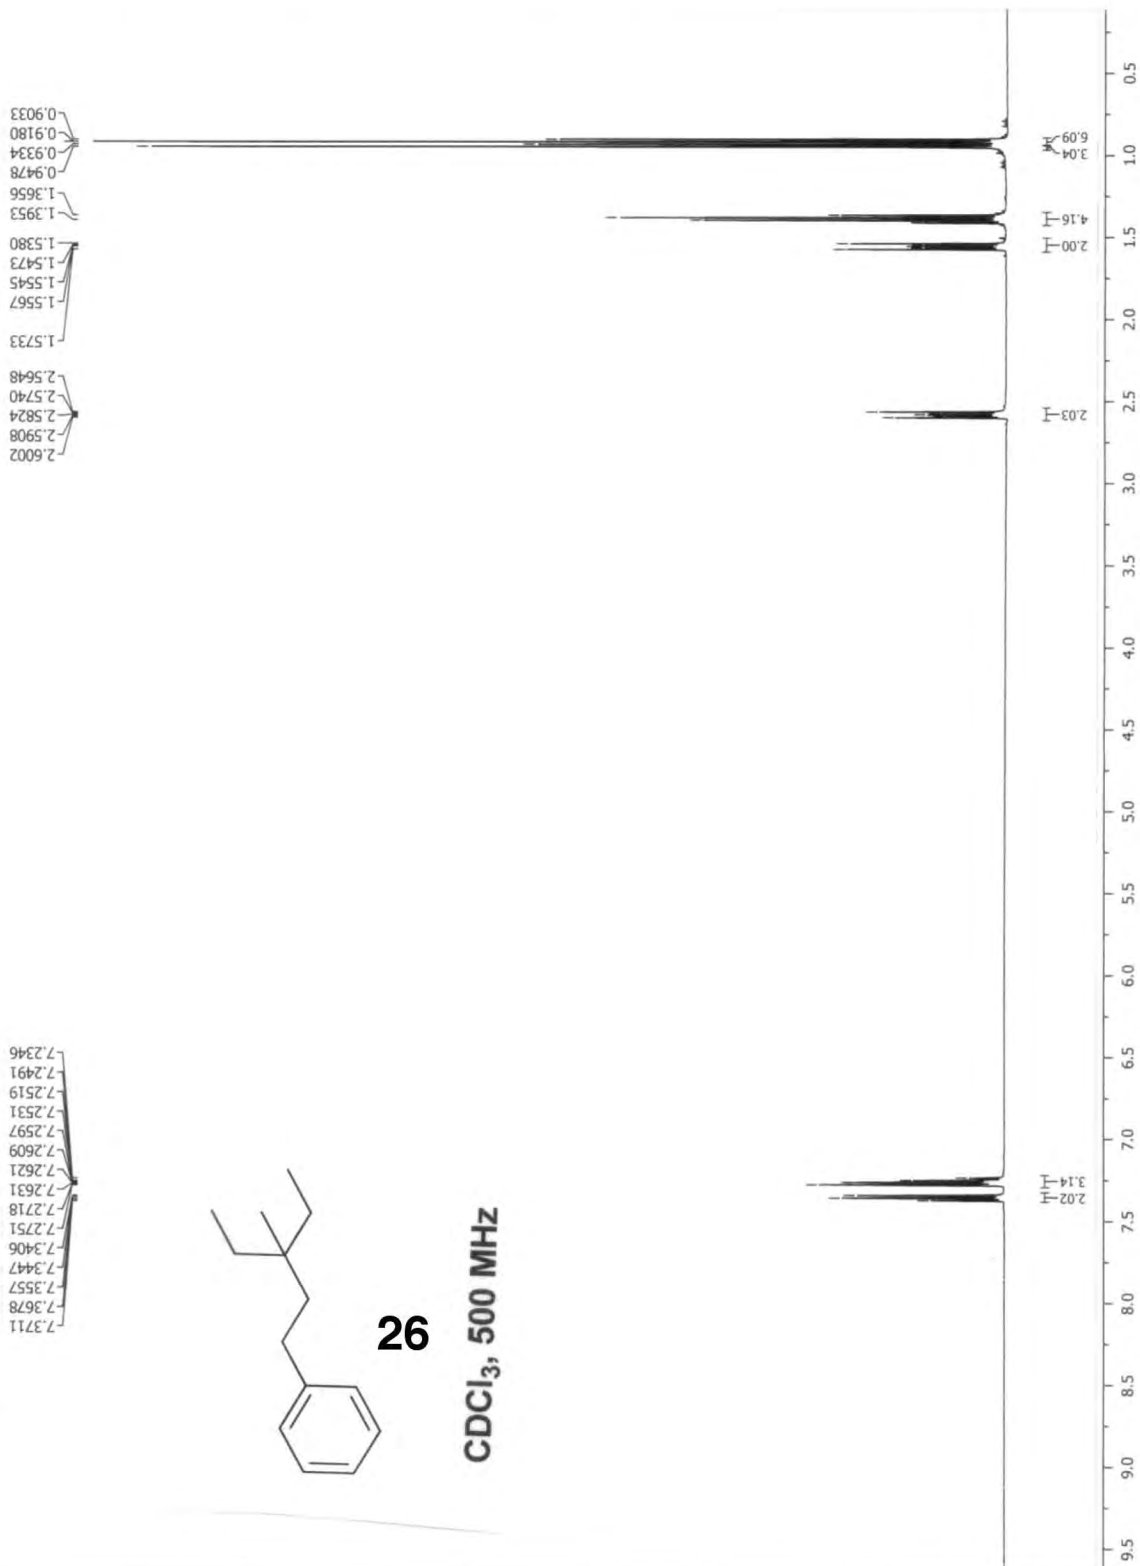

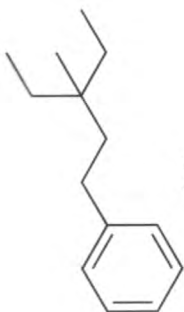

**26**

**CDCl<sub>3</sub>, 125 MHz**

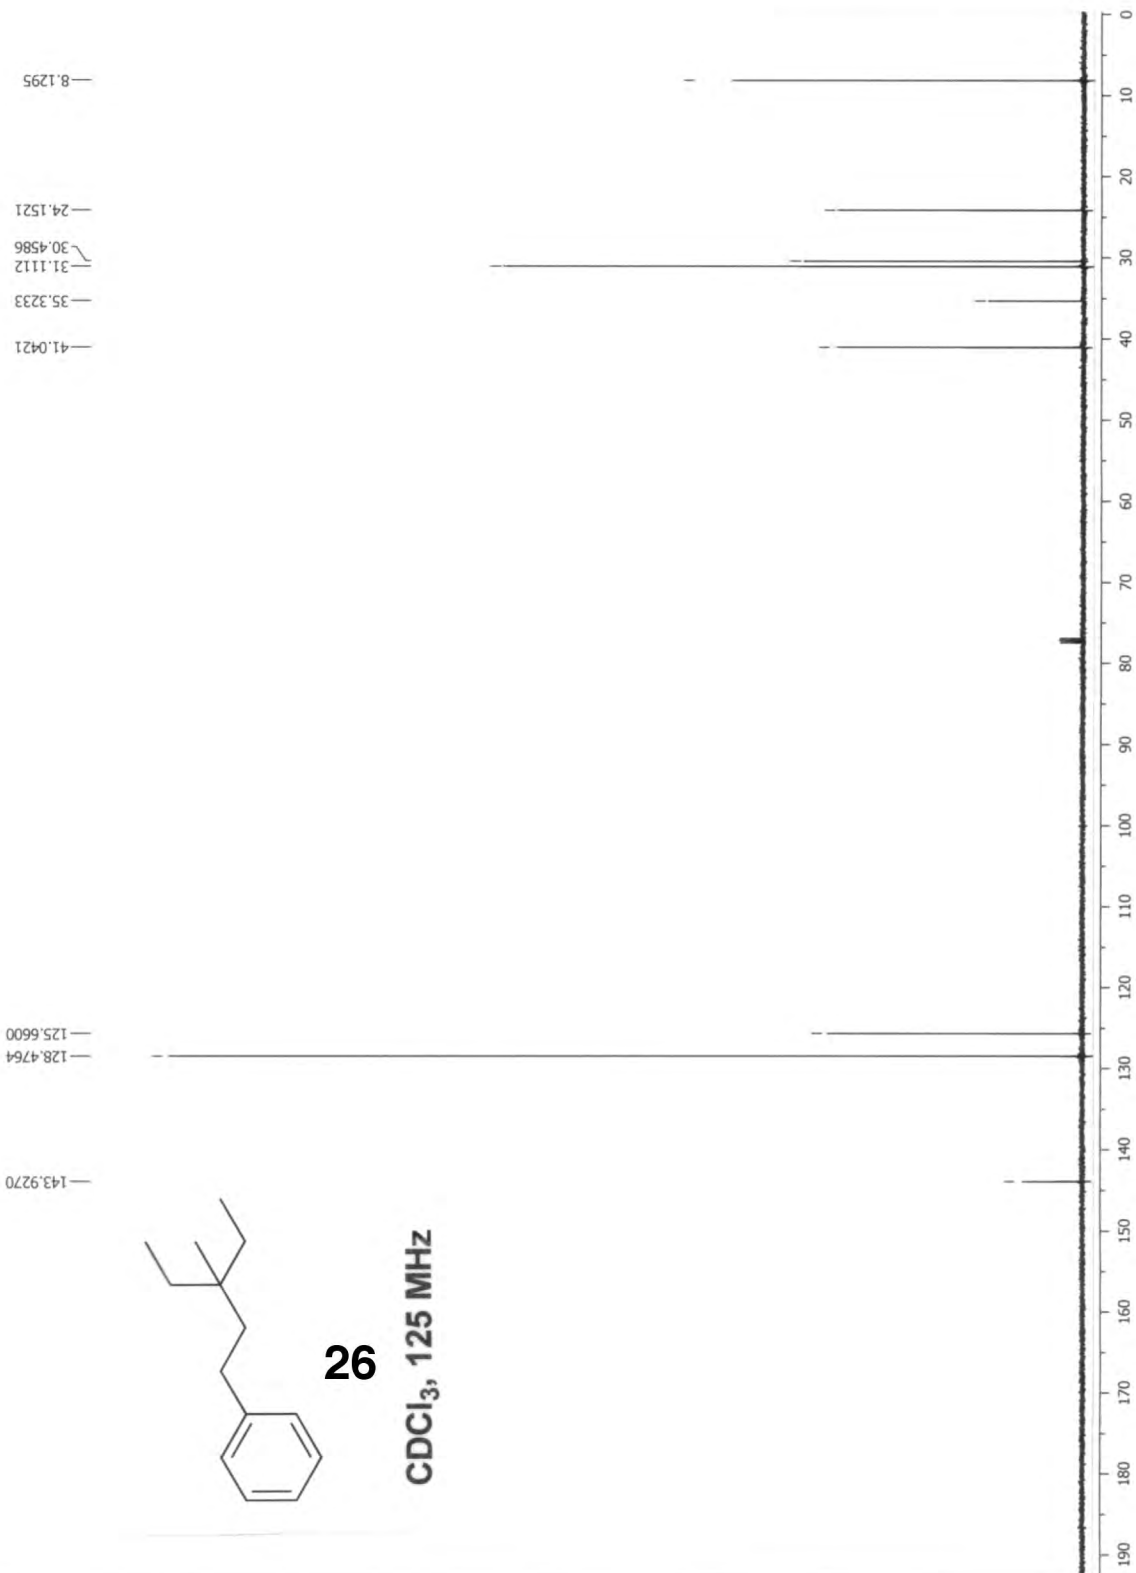

Supplement: NIHMS362742-supplement-2_si_002.pdf [file NIHMS362742-supplement-2_si_002.pdf]
